# Supplementary material for: Genome-Wide DNA Methylation Profile in Jejunum Reveals the Potential Genes Associated With Paratuberculosis in Dairy Cattle
Source: Front Genet. 2021 Oct 15;12:735147. doi: 10.3389/fgene.2021.735147 (PMC8554095; doi:10.3389/fgene.2021.735147)
Supplement: Supplementary file 1 [file Table2.XLSX]

## Sheet: CC vs. SC_DMRs
The information of DMRs among clinical and subclinical group
chr	start	end	idxStart	idxEnd	cluster	n	width	invdensity	areaStat	maxStat	meanDiff	group1.mean	group2.mean	tstat.sd	direction
10	21658921	21659808	13972323	13972389	167938	67	888	13.2537	-223.655	-1.86287	-0.127334	0.398836	0.52617	0.0509184	hypo
19	61524722	61526865	25207348	25207413	833643	66	2144	32.4848	-207.029	-1.92713	-0.132752	0.674271	0.807023	0.0463745	hypo
21	7996312	7996906	26293967	26294031	1033048	65	595	9.15385	-202.653	-1.83887	-0.178337	0.469699	0.648036	0.0577678	hypo
27	14874143	14875000	31469813	31469863	1302279	51	858	16.8235	178.428	4.01191	0.209645	0.697756	0.488111	0.05257	hyper
10	4005907	4006545	13713607	13713651	154221	45	639	14.2	170.796	4.91421	0.284751	0.526828	0.242077	0.069686	hyper
16	79255435	79256568	22229920	22229978	679338	59	1134	19.2203	164.535	3.40475	0.106063	0.853764	0.747701	0.0441139	hyper
11	106317870	106319124	16450254	16450313	329682	60	1255	20.9167	-163.243	-1.93953	-0.133441	0.540382	0.673823	0.0650648	hypo
22	54365503	54367517	27955868	27955929	1127396	62	2015	32.5	161.537	4.37495	0.106468	0.78943	0.682963	0.0453645	hyper
21	38445494	38446813	26726177	26726211	1057326	35	1320	37.7143	-157.518	-2.3338	-0.210561	0.516991	0.727552	0.0490208	hypo
24	31569491	31570814	29305593	29305647	1198363	55	1324	24.0727	-155.533	-1.84392	-0.120331	0.615258	0.735589	0.0478388	hypo
2	132964718	132965626	3470818	3470869	960459	52	909	17.4808	-153.241	-1.88157	-0.157193	0.585398	0.742591	0.0531986	hypo
1	139080675	139081391	1553951	1553984	137665	34	717	21.0882	153.006	4.89961	0.218101	0.724435	0.506334	0.0469294	hyper
21	12327858	12329565	26354163	26354199	1036770	37	1708	46.1622	152.641	4.67434	0.221841	0.752384	0.530543	0.0467233	hyper
4	119871895	119872528	6561090	6561127	1623990	38	634	16.6842	-146.52	-2.13171	-0.223563	0.327495	0.551058	0.0514623	hypo
17	72902765	72903672	23252589	23252640	740942	52	908	17.4615	-146.489	-1.98865	-0.132517	0.433121	0.565638	0.0501733	hypo
3	22716167	22716975	3819262	3819320	1424975	59	809	13.7119	143.845	2.70981	0.108361	0.330802	0.222442	0.0568759	hyper
12	86343019	86343613	17604292	17604351	404593	60	595	9.91667	-140.95	-1.85338	-0.102829	0.787444	0.890273	0.0461647	hypo
19	61227994	61228693	25199211	25199249	833521	39	700	17.9487	-139.391	-1.9007	-0.165654	0.691278	0.856932	0.0462719	hypo
22	41659886	41660573	27764560	27764598	1117770	39	688	17.641	-138.692	-1.98988	-0.146724	0.512516	0.65924	0.0475112	hypo
21	57796395	57796939	26959283	26959312	1075944	30	545	18.1667	-138.02	-1.98617	-0.291368	0.414345	0.705713	0.0561408	hypo
25	32072782	32074865	30345434	30345475	1242047	42	2084	49.619	137.703	4.07835	0.240589	0.693417	0.452828	0.0610826	hyper
7	107532865	107533141	10830390	10830424	1939020	35	277	7.91429	-136.785	-2.64931	-0.156733	0.653924	0.810657	0.0498203	hypo
28	41642568	41644112	32518754	32518805	1361771	52	1545	29.7115	-136.602	-1.8713	-0.113449	0.689768	0.803217	0.0492861	hypo
12	11336483	11337002	16582815	16582860	341168	46	520	11.3043	134.825	3.80637	0.226015	0.590257	0.364242	0.0731406	hyper
27	32197449	32198569	31725483	31725524	1316717	42	1121	26.6905	-133.988	-1.86319	-0.145781	0.512505	0.658286	0.0507164	hypo
19	61169967	61171130	25197669	25197717	833499	49	1164	23.7551	-133.786	-2.00447	-0.11391	0.628766	0.742676	0.0483584	hypo
14	81325421	81325930	20025351	20025399	537487	49	510	10.4082	132.528	3.3276	0.14099	0.724281	0.583291	0.0473415	hyper
18	6451923	6453103	23366841	23366887	745375	47	1181	25.1277	-132.506	-2.02675	-0.116877	0.520912	0.637789	0.0533141	hypo
10	17950887	17951592	13923001	13923039	165056	39	706	18.1026	-131.271	-1.9885	-0.120074	0.414631	0.534705	0.0464719	hypo
1	76201367	76202592	841621	841649	75827	29	1226	42.2759	-129.361	-1.92637	-0.212869	0.601318	0.814187	0.0500178	hypo
15	61844077	61845216	20803020	20803043	594104	24	1140	47.5	-129.34	-3.72843	-0.315348	0.444343	0.759691	0.0519751	hypo
10	7826720	7828190	13770658	13770698	157277	41	1471	35.878	129.185	3.97781	0.14819	0.759034	0.610844	0.0461758	hyper
19	39434465	39434890	24836287	24836322	819319	36	426	11.8333	128.985	4.58449	0.230798	0.434965	0.204167	0.0524588	hyper
16	79163995	79164721	22228435	22228483	679311	49	727	14.8367	-128.217	-1.88312	-0.10749	0.644897	0.752387	0.0460098	hypo
11	89968581	89969077	16198760	16198791	318975	32	497	15.5312	-127.11	-1.99816	-0.185639	0.596633	0.782272	0.0463352	hypo
6	94580071	94581063	9146614	9146661	1825085	48	993	20.6875	125.459	3.14121	0.134022	0.671083	0.537061	0.0476778	hyper
19	61483610	61484504	25206002	25206046	833628	45	895	19.8889	-125.254	-2.14923	-0.122868	0.680235	0.803103	0.0460403	hypo
13	73805340	73806742	18700719	18700749	462989	31	1403	45.2581	124.977	5.42238	0.237664	0.693309	0.455645	0.0544477	hyper
1	99206623	99206925	1109114	1109148	98226	35	303	8.65714	-124.953	-2.41841	-0.148522	0.131087	0.279609	0.0495767	hypo
23	51622840	51623387	28870462	28870508	1169644	47	548	11.6596	-124.599	-1.93216	-0.148893	0.320611	0.469504	0.0510232	hypo
26	16977516	16978777	30725873	30725916	1264023	44	1262	28.6818	-124.339	-1.8325	-0.182958	0.241442	0.4244	0.0535885	hypo
22	21625917	21627394	27489030	27489072	1100235	43	1478	34.3721	-124.246	-1.91388	-0.168393	0.509842	0.678235	0.0542947	hypo
24	17044667	17046277	29119815	29119854	1185107	40	1611	40.275	123.178	3.56865	0.188474	0.696731	0.508257	0.0540329	hyper
6	60488750	60489879	8774419	8774450	1790883	32	1130	35.3125	-122.48	-2.25919	-0.122647	0.414555	0.537202	0.0473557	hypo
19	53096755	53097553	25039829	25039868	829355	40	799	19.975	120.531	3.23106	0.136627	0.695381	0.558753	0.0486257	hyper
11	102193131	102194994	16392828	16392857	327505	30	1864	62.1333	120.035	5.28367	0.210177	0.625524	0.415347	0.0472079	hyper
19	8302964	8303570	24341562	24341597	797474	36	607	16.8611	-119.694	-1.84517	-0.156586	0.591554	0.74814	0.0510194	hypo
28	44073301	44074289	32560861	32560897	1363398	37	989	26.7297	-119.588	-1.9929	-0.177909	0.525403	0.703312	0.0592503	hypo
9	97490187	97491088	13526448	13526485	2135976	38	902	23.7368	-119.537	-1.92195	-0.164903	0.477953	0.642857	0.0537301	hypo
28	34109156	34110482	32418898	32418934	1355294	37	1327	35.8649	-119.284	-1.84211	-0.125582	0.55102	0.676603	0.0476477	hypo
25	37250948	37252151	30433817	30433867	1245127	51	1204	23.6078	-119.16	-1.83958	-0.142023	0.641543	0.783565	0.0565505	hypo
24	61504559	61505365	29821274	29821313	1219149	40	807	20.175	-118.946	-2.06915	-0.153985	0.596592	0.750577	0.0498629	hypo
28	30049041	30050511	32357387	32357425	1352153	39	1471	37.7179	118.926	4.57868	0.145444	0.650132	0.504688	0.0523809	hyper
16	2683250	2684594	21188642	21188682	614426	41	1345	32.8049	-118.369	-1.94874	-0.141896	0.642134	0.784031	0.0548601	hypo
13	74568097	74568977	18711033	18711062	463626	30	881	29.3667	117.687	5.36125	0.22683	0.711472	0.484642	0.0493137	hyper
11	103927994	103928487	16422724	16422768	328406	45	494	10.9778	115.783	3.02325	0.130052	0.725958	0.595906	0.0512422	hyper
11	4725647	4726412	15107032	15107074	242994	43	766	17.814	-115.527	-2.09769	-0.122979	0.615631	0.73861	0.0490745	hypo
18	58619699	58620483	24139050	24139085	784929	36	785	21.8056	115.268	4.1573	0.193961	0.792192	0.598231	0.0611114	hyper
19	62006231	62006698	25218343	25218366	833851	24	468	19.5	-114.822	-2.6867	-0.259597	0.37823	0.637827	0.0548922	hypo
20	69362422	69363444	26151374	26151418	1024518	45	1023	22.7333	-114.307	-1.97127	-0.101461	0.311852	0.413312	0.0482722	hypo
X	4328518	4329015	33359156	33359183	2144511	28	498	17.7857	114.214	4.57373	0.184404	0.697143	0.512739	0.0420447	hyper
13	75696324	75697226	18731223	18731263	464255	41	903	22.0244	-114.175	-1.85044	-0.113902	0.617108	0.731009	0.0463214	hypo
18	41845848	41846517	23883563	23883599	773228	37	670	18.1081	-114.081	-1.90009	-0.132384	0.540615	0.672999	0.0548923	hypo
11	44434145	44435807	15613811	15613856	278781	46	1663	36.1522	-114.016	-1.87611	-0.112528	0.767469	0.879997	0.049593	hypo
29	50437609	50438665	33300376	33300416	1404625	41	1057	25.7805	113.938	2.98815	0.155971	0.792814	0.636843	0.0556867	hyper
7	99622777	99624432	10720115	10720160	1932037	46	1656	36	-113.692	-1.87478	-0.13948	0.461931	0.601411	0.0508061	hypo
2	128628584	128629268	3394864	3394891	957876	28	685	24.4643	-113.486	-2.12886	-0.234439	0.439595	0.674034	0.0650424	hypo
8	111900462	111901385	12307980	12308022	2042968	43	924	21.4884	-113.302	-1.87901	-0.112525	0.672434	0.784959	0.0470928	hypo
10	7085037	7085942	13759301	13759328	156697	28	906	32.3571	-113.281	-2.72964	-0.258936	0.627192	0.886128	0.0600714	hypo
19	27995175	27996177	24655709	24655738	811425	30	1003	33.4333	-113.12	-1.92791	-0.159146	0.371401	0.530548	0.0501097	hypo
10	7379568	7380666	13763215	13763243	156969	29	1099	37.8966	-112.993	-2.11514	-0.141864	0.573113	0.714977	0.0445023	hypo
22	10454462	10455270	27321982	27322019	1091435	38	809	21.2895	-112.402	-1.85228	-0.155762	0.603887	0.75965	0.053599	hypo
2	30617688	30618042	2246208	2246240	863727	33	355	10.7576	-112.081	-2.43382	-0.204045	0.596888	0.800933	0.058511	hypo
7	57114422	57115564	10200021	10200056	1891799	36	1143	31.75	111.978	3.84134	0.176984	0.703675	0.526692	0.0477966	hyper
7	6808085	6808772	9583193	9583226	1847468	34	688	20.2353	-111.623	-2.0028	-0.152559	0.490185	0.642744	0.0488054	hypo
19	58811231	58812235	25144500	25144529	832343	30	1005	33.5	-111.586	-1.95957	-0.162951	0.567415	0.730366	0.0499193	hypo
7	47286143	47287459	10077546	10077578	1882671	33	1317	39.9091	-111.476	-1.86211	-0.180364	0.620434	0.800798	0.0500567	hypo
25	39473075	39473722	30479669	30479706	1246278	38	648	17.0526	111.382	3.42144	0.131544	0.790445	0.658901	0.0481185	hyper
29	45813246	45814170	33226360	33226403	1402219	44	925	21.0227	-111.365	-1.85134	-0.106188	0.341224	0.447412	0.0652394	hypo
7	17977796	17978664	9722904	9722940	1856521	37	869	23.4865	111.107	3.45336	0.151568	0.546169	0.394602	0.0516788	hyper
29	48379252	48379906	33274059	33274091	1403592	33	655	19.8485	110.962	4.47787	0.172757	0.773732	0.600975	0.0486345	hyper
10	10298593	10299835	13809815	13809843	159124	29	1243	42.8621	-110.821	-2.02112	-0.194906	0.56106	0.755966	0.0448697	hypo
1	139087307	139089104	1554060	1554096	137669	37	1798	48.5946	110.587	3.3946	0.135012	0.595749	0.460736	0.0444162	hyper
23	49313070	49313785	28815928	28815964	1168486	37	716	19.3514	109.585	3.68978	0.141388	0.784658	0.643269	0.0460227	hyper
16	20601597	20602104	21384809	21384845	631960	37	508	13.7297	109.139	3.25647	0.170954	0.503008	0.332054	0.0567961	hyper
29	49839475	49840237	33293622	33293658	1404344	37	763	20.6216	108.854	3.44505	0.118986	0.757892	0.638906	0.0513448	hyper
14	39368215	39369144	19473920	19473952	499592	33	930	28.1818	-108.167	-2.21723	-0.189216	0.565089	0.754305	0.0455307	hypo
11	99099219	99100499	16337485	16337521	325755	37	1281	34.6216	-108.139	-1.8383	-0.147762	0.424935	0.572697	0.051347	hypo
17	11245650	11247191	22409212	22409248	690002	37	1542	41.6757	108.132	3.98012	0.156128	0.663316	0.507188	0.0459654	hyper
15	66848647	66849826	20880296	20880331	598003	36	1180	32.7778	-107.88	-1.88041	-0.135476	0.504578	0.640054	0.0479859	hypo
16	50909585	50910735	21795205	21795243	657376	39	1151	29.5128	107.623	3.07818	0.113925	0.702117	0.588192	0.0450004	hyper
9	44146060	44147372	12851746	12851789	2086287	44	1313	29.8409	107.57	2.54063	0.158108	0.702407	0.544299	0.0540241	hyper
3	21087714	21088727	3797343	3797385	1423516	43	1014	23.5814	107.487	3.0013	0.137336	0.443533	0.306198	0.0549937	hyper
11	88899641	88900406	16181801	16181828	318200	28	766	27.3571	107.168	4.70714	0.166578	0.724534	0.557956	0.044775	hyper
22	53449086	53449832	27937222	27937263	1126901	42	747	17.7857	107.161	2.92789	0.130838	0.490508	0.35967	0.0527095	hyper
5	23974695	23975567	6850415	6850463	1647271	49	873	17.8163	106.738	2.32501	0.140231	0.511987	0.371756	0.0625868	hyper
19	58693645	58694585	25141797	25141834	832291	38	941	24.7632	-106.564	-1.82652	-0.146592	0.408296	0.554888	0.0462645	hypo
18	58495787	58497277	24136825	24136865	784850	41	1491	36.3659	106.388	2.88946	0.113796	0.743568	0.629772	0.0514179	hyper
5	68538777	68539657	7385538	7385567	1689009	30	881	29.3667	-106.279	-1.91665	-0.179023	0.732098	0.911121	0.049343	hypo
19	6829788	6830785	24315167	24315199	796540	33	998	30.2424	-106.08	-1.82692	-0.139283	0.379027	0.518311	0.0532401	hypo
11	81871940	81872831	16075224	16075254	313040	31	892	28.7742	-105.928	-2.61312	-0.164341	0.513318	0.67766	0.045554	hypo
15	44230416	44231335	20602765	20602804	577748	40	920	23	-105.53	-1.82918	-0.11665	0.571201	0.687851	0.0549455	hypo
17	31654075	31654855	22646456	22646498	709524	43	781	18.1628	-105.503	-1.84384	-0.109378	0.58813	0.697507	0.045897	hypo
29	49761963	49762556	33292105	33292136	1404304	32	594	18.5625	-105.479	-2.27817	-0.190798	0.569598	0.760396	0.0681658	hypo
18	9459896	9461268	23422529	23422573	747212	45	1373	30.5111	105.382	2.54371	0.136601	0.777579	0.640977	0.0543889	hyper
8	110642026	110642888	12281945	12281993	2042293	49	863	17.6122	105.033	2.5881	0.127739	0.504505	0.376767	0.0514164	hyper
3	118715221	118715938	5010096	5010131	1513153	36	718	19.9444	104.985	3.49296	0.128587	0.753654	0.625067	0.0484078	hyper
10	83134197	83134811	14710918	14710958	224532	41	615	15	-104.859	-1.87949	-0.147898	0.528534	0.676432	0.0531418	hypo
9	88130662	88131338	13367479	13367502	2129300	24	677	28.2083	-104.708	-2.23877	-0.198786	0.43091	0.629695	0.0472193	hypo
4	10733269	10733985	5172815	5172839	1523780	25	717	28.68	-104.634	-2.9234	-0.207894	0.521524	0.729418	0.0541052	hypo
19	55902491	55903368	25090938	25090976	830858	39	878	22.5128	-104.015	-1.98451	-0.164621	0.541004	0.705625	0.0575756	hypo
25	32892449	32893400	30360856	30360889	1242508	34	952	28	103.607	3.65927	0.176584	0.740311	0.563727	0.0469511	hyper
7	98048159	98048873	10703324	10703355	1930450	32	715	22.3438	-103.224	-2.24851	-0.117931	0.358277	0.476209	0.0473855	hypo
4	74349193	74349553	5926240	5926267	1586135	28	361	12.8929	-103.221	-2.34199	-0.140622	0.424355	0.564977	0.0580392	hypo
9	53107725	53109553	12946960	12946983	2095608	24	1829	76.2083	102.737	4.92555	0.262666	0.699897	0.437231	0.0591608	hyper
12	22841857	22843281	16773179	16773222	349406	44	1425	32.3864	-102.62	-2.04439	-0.129651	0.553885	0.683536	0.0519062	hypo
X	133274186	133274794	34656763	34656794	2264260	32	609	19.0312	-102.459	-2.02538	-0.124927	0.46338	0.588307	0.0440454	hypo
19	54387224	54387702	25063251	25063282	830051	32	479	14.9688	-102.417	-1.83547	-0.137331	0.546224	0.683555	0.0621419	hypo
22	6948716	6949715	27269209	27269250	1088716	42	1000	23.8095	102.369	3.48594	0.138313	0.506843	0.36853	0.0473676	hyper
16	80529336	80529912	22250452	22250493	679986	42	577	13.7381	-102.14	-1.98315	-0.119013	0.755371	0.874385	0.0538638	hypo
26	45889485	45890510	31153488	31153511	1286668	24	1026	42.75	101.761	4.50727	0.261618	0.711343	0.449725	0.0526802	hyper
22	57993427	57993951	28024677	28024702	1129492	26	525	20.1923	-101.646	-1.92372	-0.18344	0.422138	0.605578	0.0552011	hypo
29	48386337	48386693	33274218	33274245	1403597	28	357	12.75	101.548	4.50012	0.195794	0.493668	0.297873	0.0507539	hyper
12	85661955	85663089	17588484	17588526	404232	43	1135	26.3953	-101.207	-1.85463	-0.136085	0.386648	0.522733	0.0575486	hypo
22	6356475	6357718	27257610	27257633	1088391	24	1244	51.8333	-100.74	-2.15466	-0.209697	0.536951	0.746648	0.0509491	hypo
22	11393800	11394594	27338359	27338392	1092039	34	795	23.3824	-100.132	-2.16034	-0.136345	0.382842	0.519187	0.0500009	hypo
13	80911637	80912349	18844749	18844782	466804	34	713	20.9706	-100.012	-1.897	-0.114228	0.427518	0.541745	0.0447887	hypo
11	102935610	102936983	16408062	16408098	327885	37	1374	37.1351	99.9807	4.35378	0.12671	0.731229	0.604519	0.0486559	hyper
3	85837238	85838105	4530717	4530744	1487423	28	868	31	99.9713	4.20578	0.20284	0.698232	0.495392	0.0530659	hyper
11	47514579	47515064	15658087	15658120	281201	34	486	14.2941	-99.8703	-2.21746	-0.103481	0.82345	0.926931	0.0446955	hypo
20	10598563	10599153	25419389	25419430	969882	42	591	14.0714	-99.5254	-2.16974	-0.10617	0.430415	0.536585	0.0576345	hypo
11	82486548	82487525	16084643	16084676	313495	34	978	28.7647	99.4576	3.50458	0.166645	0.832047	0.665402	0.0487147	hyper
10	101825516	101826249	14999698	14999731	239029	34	734	21.5882	-99.4395	-1.85648	-0.233809	0.328294	0.562103	0.0809299	hypo
1	81824630	81825727	910926	910957	81104	32	1098	34.3125	-99.4314	-1.88279	-0.143428	0.578704	0.722131	0.0448221	hypo
11	79243294	79244415	16041355	16041394	310693	40	1122	28.05	-99.406	-1.92331	-0.102039	0.613822	0.715861	0.0462821	hypo
16	12427941	12428547	21296893	21296924	623713	32	607	18.9688	-98.9465	-2.08008	-0.154237	0.349269	0.503506	0.0476452	hypo
11	25564210	25565132	15393846	15393866	260823	21	923	43.9524	98.782	6.05568	0.210758	0.736343	0.525585	0.0464346	hyper
9	96230774	96231472	13499354	13499390	2135309	37	699	18.8919	-98.4474	-1.95031	-0.123354	0.623593	0.746947	0.052957	hypo
17	53275143	53276673	22922882	22922924	728706	43	1531	35.6047	98.2062	2.81137	0.165788	0.733644	0.567856	0.0706332	hyper
23	50075024	50076007	28834651	28834693	1168835	43	984	22.8837	98.1405	2.50607	0.114403	0.723286	0.608883	0.0474698	hyper
24	50176238	50177032	29604161	29604188	1211957	28	795	28.3929	98.0973	4.316	0.120995	0.755623	0.634629	0.0456926	hyper
16	78170534	78171090	22206078	22206121	678780	44	557	12.6591	-98.0745	-1.84513	-0.1619	0.439071	0.600971	0.0643146	hypo
6	61163361	61164469	8784572	8784598	1791444	27	1109	41.0741	-97.9516	-2.02485	-0.205174	0.595723	0.800897	0.0524834	hypo
12	33418314	33419796	16938760	16938795	357585	36	1483	41.1944	97.8078	3.05103	0.149703	0.728727	0.579024	0.0475512	hyper
26	11027223	11028186	30647030	30647055	1258855	26	964	37.0769	-97.7213	-2.83279	-0.180694	0.430007	0.610702	0.0466926	hypo
5	118555715	118556371	8076963	8076999	1730135	37	657	17.7568	-97.616	-1.8575	-0.115272	0.450047	0.565319	0.0502046	hypo
11	99446416	99446969	16342905	16342942	325945	38	554	14.5789	97.4566	2.75205	0.161835	0.257331	0.0954964	0.0543424	hyper
19	13718260	13718915	24426833	24426871	801657	39	656	16.8205	97.3089	2.64284	0.137729	0.776161	0.638432	0.0465384	hyper
17	21404619	21405504	22549377	22549415	698789	39	886	22.7179	97.2366	3.24307	0.174911	0.705838	0.530927	0.0652869	hyper
8	110931920	110932515	12288689	12288729	2042442	41	596	14.5366	-96.7314	-1.84425	-0.106731	0.686747	0.793479	0.0469426	hypo
10	9343665	9344632	13795623	13795656	158436	34	968	28.4706	96.7076	3.29324	0.136326	0.837674	0.701348	0.0442272	hyper
13	81353830	81354674	18856086	18856133	466972	48	845	17.6042	96.6331	2.1662	0.105091	0.76647	0.661379	0.0581974	hyper
28	9578203	9580001	32108455	32108487	1332906	33	1799	54.5152	-96.4072	-1.88928	-0.127084	0.444496	0.571581	0.0587504	hypo
5	108454515	108455056	7900265	7900298	1724152	34	542	15.9412	-96.3345	-2.09309	-0.129087	0.543235	0.672322	0.0550722	hypo
4	118005852	118006594	6524509	6524537	1622906	29	743	25.6207	-96.2711	-1.85449	-0.171684	0.584487	0.756171	0.0521674	hypo
22	6735922	6737317	27264644	27264676	1088610	33	1396	42.303	96.2657	3.66269	0.206653	0.759187	0.552535	0.0657403	hyper
8	107058322	107059658	12220463	12220499	2039702	37	1337	36.1351	-96.1124	-1.83147	-0.124807	0.124519	0.249325	0.058604	hypo
21	34621351	34622474	26683769	26683794	1053496	26	1124	43.2308	96.0658	5.42018	0.231872	0.84286	0.610988	0.0503718	hyper
26	31203023	31203354	30908371	30908413	1276540	43	332	7.72093	-95.9938	-1.85529	-0.113827	0.286955	0.400782	0.0491891	hypo
7	83542723	83543260	10521466	10521502	1916811	37	538	14.5405	95.8746	2.74099	0.20578	0.708907	0.503127	0.0799545	hyper
7	6114364	6115346	9570464	9570503	1847067	40	983	24.575	95.7638	2.59094	0.137278	0.792316	0.655038	0.0499066	hyper
3	111254091	111255071	4871592	4871619	1508812	28	981	35.0357	-95.6452	-1.85794	-0.198416	0.415639	0.614055	0.0607562	hypo
18	63522237	63523252	24208720	24208761	788176	42	1016	24.1905	-95.2839	-1.83327	-0.159775	0.464598	0.624374	0.0641606	hypo
20	6912993	6913829	25362035	25362066	967014	32	837	26.1562	95.1611	3.51724	0.152423	0.813047	0.660625	0.0518175	hyper
19	62424437	62424970	25227169	25227207	834093	39	534	13.6923	-95.1184	-1.89168	-0.119996	0.629149	0.749145	0.0509008	hypo
18	33686531	33687019	23766009	23766040	766718	32	489	15.2812	-94.7309	-1.84864	-0.118816	0.605161	0.723976	0.0472632	hypo
15	41940675	41941321	20571459	20571490	575759	32	647	20.2188	-94.4877	-2.03886	-0.160699	0.359589	0.520288	0.0485974	hypo
27	33424894	33425578	31748598	31748627	1317408	30	685	22.8333	94.3824	3.6722	0.149035	0.71259	0.563556	0.047841	hyper
16	2617077	2618265	21187484	21187523	614388	40	1189	29.725	94.322	2.87305	0.102054	0.685882	0.583828	0.0535919	hyper
12	11602906	11603515	16587625	16587658	341359	34	610	17.9412	94.2705	2.98047	0.156677	0.678518	0.521841	0.0593626	hyper
24	61460746	61461334	29820022	29820059	1219135	38	589	15.5	-94.1788	-1.83309	-0.129172	0.574995	0.704167	0.0512305	hypo
27	21691194	21692312	31569028	31569062	1308075	35	1119	31.9714	-94.1734	-2.11488	-0.14036	0.498419	0.638779	0.0550736	hypo
17	59557083	59558060	23021840	23021872	733264	33	978	29.6364	-94.1245	-1.91994	-0.137354	0.439831	0.577185	0.0586447	hypo
10	101089339	101089862	14981181	14981219	238737	39	524	13.4359	94.0896	2.65427	0.121993	0.880828	0.758835	0.0532275	hyper
16	4452906	4454276	21219264	21219301	615545	38	1371	36.0789	-93.9528	-1.97669	-0.120355	0.412542	0.532896	0.0510528	hypo
5	65003723	65004151	7338104	7338137	1685893	34	429	12.6176	-93.8546	-2.70538	-0.114539	0.744642	0.859181	0.0523261	hypo
9	35172397	35173623	12739221	12739247	2077760	27	1227	45.4444	-93.7854	-2.80805	-0.234826	0.40452	0.639346	0.0540202	hypo
22	47663470	47665067	27853662	27853696	1122640	35	1598	45.6571	93.6924	3.27015	0.147421	0.85302	0.7056	0.050619	hyper
3	115284910	115285875	4942518	4942547	1511310	30	966	32.2	93.6019	3.50668	0.182076	0.849895	0.667819	0.0536494	hyper
17	47788071	47789704	22832474	22832511	724899	38	1634	43	93.5933	3.35862	0.248238	0.669854	0.421616	0.0776759	hyper
9	72968210	72968903	13171941	13171967	2115531	27	694	25.7037	-93.4641	-2.03891	-0.139543	0.40606	0.545604	0.0446927	hypo
11	10442899	10444030	15201867	15201905	246909	39	1132	29.0256	93.4612	2.61002	0.197658	0.635791	0.438134	0.0725682	hyper
11	6604882	6605475	15141641	15141681	244072	41	594	14.4878	93.4593	2.59167	0.107707	0.861544	0.753837	0.0447397	hyper
25	36620665	36621705	30423223	30423247	1244702	25	1041	41.64	-92.8664	-1.86887	-0.126571	0.381225	0.507796	0.0537401	hypo
19	14194592	14195398	24436126	24436158	801951	33	807	24.4545	-92.8216	-2.06846	-0.124749	0.583991	0.70874	0.0510536	hypo
4	10033884	10034891	5161978	5162008	1523261	31	1008	32.5161	-92.5748	-1.91306	-0.171566	0.245551	0.417117	0.0686798	hypo
20	66053630	66054566	26088362	26088387	1022578	26	937	36.0385	-92.5224	-2.01278	-0.161211	0.605675	0.766886	0.0486602	hypo
9	38287470	38288071	12772472	12772487	2080997	16	602	37.625	92.5095	7.16967	0.270945	0.831793	0.560847	0.0468621	hyper
16	4300852	4302319	21216390	21216421	615456	32	1468	45.875	92.393	5.5491	0.153802	0.718574	0.564772	0.0496204	hyper
28	33751137	33752030	32413127	32413156	1355076	30	894	29.8	-92.3802	-2.13583	-0.146045	0.456521	0.602565	0.0469985	hypo
12	67521626	67522328	17304748	17304777	391853	30	703	23.4333	-92.0607	-1.88844	-0.112265	0.61794	0.730206	0.0500946	hypo
12	4759292	4760052	16511425	16511445	334734	21	761	36.2381	91.9806	4.5322	0.241728	0.658935	0.417207	0.0472659	hyper
26	41803406	41804364	31076773	31076802	1284398	30	959	31.9667	91.9569	3.59623	0.212875	0.929293	0.716418	0.0466436	hyper
16	29737296	29738646	21510889	21510923	639828	35	1351	38.6	91.8254	3.4714	0.14775	0.626655	0.478905	0.0497263	hyper
14	77388490	77389494	19961126	19961153	534378	28	1005	35.8929	-91.8127	-1.95196	-0.177618	0.480512	0.65813	0.0495846	hypo
10	101902737	101903625	15001427	15001462	239068	36	889	24.6944	91.8104	3.32728	0.126519	0.667657	0.541138	0.0551211	hyper
13	35677318	35678082	18131716	18131749	434537	34	765	22.5	-91.6877	-2.07385	-0.139289	0.488428	0.627717	0.0542256	hypo
25	3604786	3605251	29888155	29888173	1221867	19	466	24.5263	91.6859	5.74362	0.256351	0.671831	0.41548	0.0559627	hyper
17	46245576	46246499	22808308	22808340	723752	33	924	28	-91.5877	-2.05067	-0.142952	0.419721	0.562673	0.0475023	hypo
22	59961424	59961992	28060065	28060095	1130543	31	569	18.3548	-91.45	-1.82651	-0.113132	0.453149	0.566281	0.0450572	hypo
13	73064765	73065791	18688778	18688795	462512	18	1027	57.0556	-91.2294	-4.42216	-0.253036	0.579082	0.832118	0.0452057	hypo
12	10674977	10675944	16571012	16571037	340733	26	968	37.2308	-91.1985	-1.93144	-0.170614	0.669339	0.839953	0.0488336	hypo
5	66675126	66675800	7359299	7359334	1687438	36	675	18.75	-91.1136	-2.04393	-0.154971	0.236675	0.391646	0.0621324	hypo
8	26560394	26561306	11222719	11222750	1965406	32	913	28.5312	-90.9887	-2.10424	-0.140522	0.667961	0.808483	0.0460914	hypo
3	89093836	89094709	4573228	4573268	1490354	41	874	21.3171	-90.8601	-1.89975	-0.102325	0.750862	0.853187	0.0545947	hypo
9	97148860	97150521	13519568	13519599	2135778	32	1662	51.9375	90.8118	3.39161	0.177699	0.708426	0.530726	0.050039	hyper
27	14943694	14944568	31471493	31471520	1302301	28	875	31.25	-90.7364	-2.16863	-0.158117	0.410721	0.568838	0.054619	hypo
9	101897267	101898140	13611507	13611543	2138809	37	874	23.6216	90.67	2.90159	0.138917	0.662581	0.523664	0.0521335	hyper
20	32815740	32816119	25691834	25691865	991228	32	380	11.875	90.652	3.08861	0.143257	0.794593	0.651336	0.04703	hyper
4	4270186	4271207	5078791	5078819	1518745	29	1022	35.2414	90.5158	3.6133	0.213675	0.639854	0.426179	0.0616432	hyper
1	68653526	68654889	745268	745309	68971	42	1364	32.4762	90.4807	2.37262	0.114002	0.785288	0.671286	0.0444099	hyper
X	43130871	43131909	33698153	33698193	2175073	41	1039	25.3415	-90.2918	-1.89323	-0.16688	0.569682	0.736562	0.0417813	hypo
19	60783489	60784529	25188473	25188497	833333	25	1041	41.64	-90.2052	-1.88758	-0.189446	0.47898	0.668426	0.0517154	hypo
11	89327692	89328675	16188575	16188594	318505	20	984	49.2	90.1008	5.81257	0.254292	0.712999	0.458707	0.0517302	hyper
22	3451163	3452624	27211406	27211436	1086192	31	1462	47.1613	90.0842	3.45634	0.119447	0.673232	0.553785	0.0479257	hyper
13	13207838	13209062	17802790	17802820	416086	31	1225	39.5161	-90.0419	-2.01439	-0.145015	0.678492	0.823506	0.0483662	hypo
12	3898972	3899653	16503861	16503888	333820	28	682	24.3571	-90.0167	-2.01851	-0.125003	0.64855	0.773553	0.0468242	hypo
6	24444111	24445041	8382805	8382831	1754733	27	931	34.4815	-89.9907	-2.21649	-0.138475	0.5623	0.700775	0.0483856	hypo
5	21894873	21896578	6820579	6820610	1645523	32	1706	53.3125	-89.8215	-1.84987	-0.162815	0.494957	0.657771	0.0532763	hypo
4	46935872	46936534	5600314	5600335	1559543	22	663	30.1364	89.7398	4.88337	0.213903	0.604329	0.390426	0.0480077	hyper
27	33921054	33921880	31756933	31756960	1317672	28	827	29.5357	-89.5454	-1.87474	-0.154879	0.416808	0.571687	0.0488303	hypo
9	97022296	97023051	13516707	13516737	2135725	31	756	24.3871	89.5002	3.39441	0.114725	0.794741	0.680015	0.0491211	hyper
10	100097192	100097919	14959451	14959485	238221	35	728	20.8	89.3634	3.1946	0.125675	0.677728	0.552053	0.0469819	hyper
12	17105347	17106955	16682187	16682215	345147	29	1609	55.4828	-89.2283	-2.67211	-0.141717	0.58185	0.723567	0.0500751	hypo
X	50723570	50724420	33770258	33770296	2182898	39	851	21.8205	89.2064	2.69157	0.122707	0.396647	0.27394	0.051671	hyper
21	4800396	4801742	26250231	26250264	1030370	34	1347	39.6176	-89.1267	-2.36422	-0.12622	0.600564	0.726784	0.0454492	hypo
13	18549332	18550062	17885495	17885527	420280	33	731	22.1515	-89.1073	-1.85565	-0.108819	0.524336	0.633155	0.0523338	hypo
16	33695060	33695695	21567297	21567323	643164	27	636	23.5556	-88.9896	-1.87761	-0.150604	0.617859	0.768463	0.0491605	hypo
10	58134808	58135973	14388505	14388542	201696	38	1166	30.6842	88.6134	2.50669	0.12815	0.68097	0.552819	0.0458779	hyper
27	19576761	19577830	31542394	31542419	1306095	26	1070	41.1538	-88.4959	-1.86867	-0.165973	0.479499	0.645472	0.0509607	hypo
7	65590229	65590651	10306421	10306444	1899472	24	423	17.625	-88.4399	-2.74008	-0.156804	0.467105	0.623908	0.0452679	hypo
20	22843326	22844162	25576175	25576207	981330	33	837	25.3636	-88.3034	-2.26584	-0.12114	0.265594	0.386733	0.0455142	hypo
1	23206455	23207411	274564	274588	22011	25	957	38.28	88.2799	4.32569	0.133805	0.700625	0.56682	0.0443028	hyper
6	97178942	97180117	9180705	9180729	1827406	25	1176	47.04	-88.2425	-3.00461	-0.235054	0.437825	0.672879	0.0577448	hypo
6	91668290	91668803	9108847	9108875	1822406	29	514	17.7241	-88.2104	-1.97407	-0.142372	0.0969384	0.239311	0.0594947	hypo
5	74897531	74898440	7473531	7473555	1694198	25	910	36.4	-88.1025	-2.3346	-0.19007	0.470443	0.660513	0.0451654	hypo
13	44279394	44279943	18267155	18267190	440609	36	550	15.2778	-88.0033	-1.86648	-0.114551	0.494473	0.609024	0.057926	hypo
17	52134953	52135576	22902592	22902613	727959	22	624	28.3636	87.964	5.31029	0.206108	0.702393	0.496285	0.0464263	hyper
16	2613882	2614933	21187414	21187445	614386	32	1052	32.875	-87.8592	-2.28002	-0.163746	0.492877	0.656624	0.0514786	hypo
13	40411318	40411971	18209234	18209263	437791	30	654	21.8	-87.858	-1.88436	-0.110173	0.322109	0.432282	0.0444168	hypo
10	7056842	7057414	13758817	13758842	156674	26	573	22.0385	87.6714	4.01942	0.157335	0.639835	0.4825	0.0486068	hyper
1	81784073	81784884	910455	910480	81063	26	812	31.2308	-87.6336	-2.61825	-0.16288	0.618801	0.781682	0.0515599	hypo
5	2657878	2658444	6596625	6596654	1626491	30	567	18.9	-87.594	-2.3303	-0.148859	0.254541	0.4034	0.0573961	hypo
1	28558582	28559812	328260	328288	27613	29	1231	42.4483	87.4116	3.44047	0.152164	0.659312	0.507148	0.0540577	hyper
7	29697084	29698022	9875422	9875450	1866602	29	939	32.3793	-87.354	-1.87053	-0.129958	0.580421	0.710379	0.045659	hypo
11	7349372	7350440	15153679	15153705	244549	27	1069	39.5926	-87.3397	-2.02006	-0.136054	0.66338	0.799434	0.0453267	hypo
X	133509587	133510187	34662336	34662362	2264356	27	601	22.2593	-87.2287	-1.97223	-0.138749	0.628521	0.76727	0.050042	hypo
14	3555860	3556219	18950363	18950400	470325	38	360	9.47368	-87.131	-1.84438	-0.128613	0.634492	0.763105	0.0539065	hypo
3	7179278	7179918	3618968	3618988	1411618	21	641	30.5238	-87.1275	-2.97818	-0.180785	0.604822	0.785607	0.052412	hypo
21	66809514	66810733	27113210	27113249	1081698	40	1220	30.5	-87.0486	-1.83638	-0.134182	0.638457	0.772638	0.0570257	hypo
1	41370715	41372244	445273	445298	41407	26	1530	58.8462	86.9115	3.64526	0.175507	0.592866	0.417358	0.0443857	hyper
8	111262532	111263081	12294831	12294866	2042632	36	550	15.2778	-86.7065	-2.05465	-0.125592	0.40955	0.535142	0.0516057	hypo
15	33921322	33922945	20463710	20463740	568891	31	1624	52.3871	86.6794	3.92552	0.158654	0.824417	0.665763	0.049227	hyper
17	50819323	50819961	22879249	22879276	727180	28	639	22.8214	86.6195	3.53556	0.220355	0.927166	0.70681	0.0715055	hyper
4	115986896	115987629	6481670	6481710	1621883	41	734	17.9024	-86.5755	-1.86856	-0.108101	0.601732	0.709833	0.0561231	hypo
4	115823039	115823505	6478324	6478350	1621803	27	467	17.2963	-86.461	-2.44455	-0.143978	0.504945	0.648923	0.0448292	hypo
3	17848086	17849328	3753925	3753951	1420705	27	1243	46.037	86.4537	3.63227	0.143902	0.550521	0.406619	0.0469122	hyper
16	80357253	80357927	22248743	22248778	679891	36	675	18.75	86.4007	2.73575	0.114428	0.64141	0.526982	0.043975	hyper
28	24406883	24407467	32278442	32278467	1347470	26	585	22.5	86.3306	4.77111	0.149005	0.636801	0.487796	0.0456259	hyper
13	81349961	81350620	18855992	18856019	466971	28	660	23.5714	-86.2667	-1.90947	-0.149904	0.631289	0.781193	0.0447707	hypo
3	120660719	120661526	5034978	5035014	1514303	37	808	21.8378	86.1921	2.67749	0.11846	0.769268	0.650808	0.0537662	hyper
1	119182170	119183195	1326501	1326534	118357	34	1026	30.1765	85.9969	3.05348	0.14622	0.660257	0.514037	0.0545703	hyper
11	11421704	11422426	15216011	15216036	247707	26	723	27.8077	85.8567	4.26389	0.202716	0.739268	0.536553	0.058394	hyper
11	860238	860997	15040782	15040814	240440	33	760	23.0303	85.7613	3.24893	0.173247	0.68389	0.510644	0.0617765	hyper
3	8042673	8044320	3632321	3632356	1412258	36	1648	45.7778	-85.756	-1.87097	-0.11171	0.559474	0.671185	0.044706	hypo
26	22247634	22248300	30800237	30800272	1268356	36	667	18.5278	-85.7532	-1.82927	-0.128929	0.64624	0.775169	0.0491187	hypo
17	17891142	17891668	22508520	22508557	695442	38	527	13.8684	-85.633	-1.84296	-0.128452	0.455774	0.584226	0.0691735	hypo
5	108441737	108443121	7900095	7900125	1724142	31	1385	44.6774	-85.621	-1.88618	-0.107617	0.595342	0.70296	0.0458496	hypo
10	9212634	9213077	13793832	13793849	158314	18	444	24.6667	-85.603	-4.55232	-0.30486	0.609765	0.914625	0.0537181	hypo
28	14219362	14220400	32161189	32161220	1337437	32	1039	32.4688	-85.5962	-1.9959	-0.119803	0.450701	0.570504	0.0481042	hypo
10	16482218	16483105	13901278	13901300	163984	23	888	38.6087	85.4836	4.18203	0.215966	0.83471	0.618745	0.0530842	hyper
5	44723423	44724680	7100522	7100547	1666437	26	1258	48.3846	85.3482	4.3494	0.143682	0.671319	0.527637	0.0513018	hyper
1	14065055	14065792	182889	182916	12360	28	738	26.3571	85.3263	3.99755	0.186785	0.802985	0.6162	0.0476823	hyper
X	134708236	134709385	34689927	34689957	2264824	31	1150	37.0968	-85.2961	-2.02058	-0.145266	0.446771	0.592036	0.0544516	hypo
12	15496837	15497539	16654892	16654918	344010	27	703	26.037	-85.2605	-1.88761	-0.170501	0.591925	0.762425	0.0552926	hypo
9	34713890	34715507	12734490	12734514	2077273	25	1618	64.72	85.1737	4.04183	0.190986	0.749223	0.558237	0.0443295	hyper
20	17571870	17572813	25507706	25507739	976445	34	944	27.7647	-85.1722	-1.8799	-0.110026	0.629247	0.739273	0.0482438	hypo
1	22002132	22002979	260899	260929	20790	31	848	27.3548	-85.1354	-1.9809	-0.159371	0.30534	0.464711	0.0565063	hypo
6	111022684	111023513	9375193	9375222	1838798	30	830	27.6667	-85.0585	-1.93809	-0.112954	0.665745	0.778699	0.0492713	hypo
22	37470231	37471083	27701818	27701851	1114354	34	853	25.0882	85.032	3.11736	0.164888	0.848906	0.684018	0.0623131	hyper
12	18536012	18536843	16702197	16702224	346361	28	832	29.7143	85.0105	3.52648	0.126369	0.749882	0.623513	0.0472367	hyper
9	100374687	100375311	13577460	13577487	2138035	28	625	22.3214	-84.8617	-1.96027	-0.126327	0.51957	0.645898	0.0483204	hypo
4	59979257	59979895	5745394	5745419	1572725	26	639	24.5769	-84.8193	-1.82697	-0.139818	0.200813	0.340631	0.0518068	hypo
11	4663224	4663713	15105580	15105610	242963	31	490	15.8065	-84.7238	-2.0375	-0.154585	0.330907	0.485492	0.0491857	hypo
16	27813598	27813745	21483302	21483344	638264	43	148	3.44186	-84.694	-1.82725	-0.173528	0.294223	0.467751	0.0942878	hypo
12	83256607	83257029	17534568	17534599	402979	32	423	13.2188	-84.6119	-1.95185	-0.111119	0.534614	0.645733	0.045206	hypo
5	19366216	19367775	6789983	6790012	1643073	30	1560	52	84.595	3.29841	0.139081	0.805889	0.666809	0.0465367	hyper
4	81391666	81392750	6014262	6014290	1592445	29	1085	37.4138	-84.5168	-2.23164	-0.153778	0.622494	0.776272	0.046972	hypo
9	60017353	60018321	13014420	13014452	2102942	33	969	29.3636	84.4674	2.80129	0.119548	0.534636	0.415089	0.0475739	hyper
8	38597822	38598260	11354409	11354438	1977472	30	439	14.6333	-84.3825	-2.13173	-0.118235	0.731264	0.849499	0.0505437	hypo
5	49140838	49141754	7159510	7159541	1670400	32	917	28.6562	84.2499	3.44468	0.10969	0.766887	0.657196	0.0459094	hyper
3	84491824	84492388	4514374	4514412	1486126	39	565	14.4872	-84.1207	-1.93056	-0.127787	0.560045	0.687832	0.0573038	hypo
18	56328565	56329474	24105297	24105327	783321	31	910	29.3548	84.1141	3.39082	0.13455	0.57945	0.4449	0.0552551	hyper
13	17458917	17459616	17867347	17867379	419464	33	700	21.2121	84.0704	2.73065	0.137574	0.684724	0.54715	0.0463056	hyper
6	116615103	116615647	9469186	9469222	1841952	37	545	14.7297	84.032	2.42137	0.137354	0.672245	0.534891	0.0630556	hyper
11	105676492	105676715	16444027	16444052	329381	26	224	8.61538	83.978	3.54089	0.165161	0.719483	0.554322	0.0537438	hyper
10	3625095	3625795	13708435	13708458	153915	24	701	29.2083	83.958	4.2124	0.269876	0.754595	0.484719	0.059843	hyper
23	30033219	30033913	28484062	28484095	1154821	34	695	20.4412	83.9491	2.88025	0.188366	0.494542	0.306176	0.0714788	hyper
7	86036003	86037936	10545810	10545844	1919431	35	1934	55.2571	83.9017	2.75545	0.121495	0.704594	0.583099	0.0462767	hyper
14	55644108	55645212	19657716	19657737	515556	22	1105	50.2273	83.5363	4.16601	0.202769	0.642074	0.439305	0.0577442	hyper
11	104175867	104176481	16425253	16425272	328525	20	615	30.75	83.4874	5.28706	0.317439	0.706847	0.389407	0.0591701	hyper
5	43316587	43317620	7083633	7083652	1665177	20	1034	51.7	-83.1659	-2.55234	-0.136494	0.718071	0.854565	0.0454594	hypo
5	54353690	54354491	7216156	7216182	1675673	27	802	29.7037	-83.1584	-2.16014	-0.150241	0.171924	0.322165	0.0593729	hypo
19	37905600	37906030	24814792	24814827	818100	36	431	11.9722	-83.1219	-1.83969	-0.170722	0.273381	0.444103	0.0660096	hypo
5	21875634	21876313	6820291	6820315	1645508	25	680	27.2	-83.0208	-2.17496	-0.181439	0.441505	0.622944	0.0507161	hypo
23	30073233	30073529	28484793	28484822	1154850	30	297	9.9	82.8175	3.15968	0.131948	0.295082	0.163134	0.0469359	hyper
22	6801033	6801897	27266169	27266203	1088638	35	865	24.7143	82.7609	2.77125	0.151693	0.764063	0.612369	0.0524695	hyper
28	8625267	8626327	32093880	32093899	1332196	20	1061	53.05	-82.7385	-2.14258	-0.190022	0.512349	0.70237	0.0472346	hypo
2	94263336	94263961	2941198	2941230	928039	33	626	18.9697	-82.6668	-1.87327	-0.101259	0.582058	0.683316	0.0445642	hypo
29	37468256	37468889	33111456	33111483	1395953	28	634	22.6429	-82.6043	-1.92013	-0.156472	0.405324	0.561796	0.0615055	hypo
19	22446492	22447140	24570984	24571010	807502	27	649	24.037	82.5562	3.40596	0.157675	0.693637	0.535962	0.0481676	hyper
22	5651799	5652903	27245980	27246010	1087867	31	1105	35.6452	-82.5364	-1.83881	-0.145688	0.664751	0.810439	0.0559834	hypo
29	48200234	48200910	33271132	33271151	1403509	20	677	33.85	-82.3362	-2.38726	-0.155877	0.422867	0.578744	0.0488748	hypo
26	49340322	49341064	31226780	31226818	1288452	39	743	19.0513	82.3325	2.23564	0.104368	0.848196	0.743828	0.0469958	hyper
21	68806679	68806854	27151111	27151144	1082741	34	176	5.17647	-82.2587	-2.05059	-0.132277	0.397713	0.529991	0.0474531	hypo
12	16594772	16595259	16674795	16674818	344697	24	488	20.3333	-82.2459	-2.15528	-0.159979	0.567874	0.727854	0.0486205	hypo
10	80398937	80399541	14667437	14667461	222615	25	605	24.2	-82.1632	-2.41513	-0.164743	0.533846	0.698588	0.0509563	hypo
20	56603286	56603991	25950505	25950532	1014925	28	706	25.2143	-82.1322	-2.52538	-0.142777	0.303639	0.446416	0.0581568	hypo
1	69144529	69145119	751554	751577	69431	24	591	24.625	82.1021	6.62345	0.233739	0.866715	0.632976	0.0515163	hyper
27	8979110	8980491	31390439	31390466	1297080	28	1382	49.3571	-82.0589	-1.85102	-0.112955	0.604786	0.717741	0.0458015	hypo
4	20673710	20674247	5299089	5299116	1533107	28	538	19.2143	-82.0114	-2.06131	-0.129466	0.56184	0.691306	0.0531371	hypo
1	36673425	36674228	401526	401555	36376	30	804	26.8	-82.0045	-2.09572	-0.118742	0.445707	0.564449	0.0464523	hypo
4	119719844	119720110	6557952	6557988	1623882	37	267	7.21622	-81.9401	-2.01764	-0.120442	0.499986	0.620429	0.0531107	hypo
10	100118300	100118614	14959809	14959836	238236	28	315	11.25	-81.9148	-1.90387	-0.150293	0.607061	0.757354	0.0461585	hypo
26	46605431	46606528	31167552	31167576	1287049	25	1098	43.92	-81.9108	-2.02541	-0.139431	0.649701	0.789132	0.0478969	hypo
7	62720089	62721092	10272163	10272192	1896776	30	1004	33.4667	-81.9058	-1.82983	-0.101518	0.329899	0.431418	0.0450066	hypo
11	89056595	89057267	16184547	16184574	318300	28	673	24.0357	-81.9047	-2.09329	-0.146515	0.447436	0.593951	0.0498549	hypo
17	66859198	66859665	23158613	23158644	737450	32	468	14.625	-81.9033	-2.21318	-0.113562	0.565613	0.679175	0.0480647	hypo
12	17941387	17942581	16693048	16693085	345884	38	1195	31.4474	-81.8813	-1.88879	-0.102383	0.305774	0.408157	0.0513082	hypo
19	59466562	59467140	25159867	25159896	832645	30	579	19.3	-81.8781	-1.90618	-0.154837	0.509669	0.664506	0.0545887	hypo
5	98190555	98191467	7752785	7752807	1716376	23	913	39.6957	-81.8271	-2.20116	-0.174489	0.446058	0.620547	0.0486801	hypo
24	21919013	21919624	29180638	29180664	1189561	27	612	22.6667	-81.6964	-2.18164	-0.162973	0.610322	0.773295	0.0512534	hypo
18	64744036	64745300	24232175	24232206	788829	32	1265	39.5312	81.663	3.81882	0.139455	0.550388	0.410933	0.0562083	hyper
23	12231287	12232309	28246224	28246245	1140905	22	1023	46.5	-81.6275	-2.5276	-0.190202	0.685274	0.875476	0.046281	hypo
11	21089155	21089579	15337577	15337610	256652	34	425	12.5	81.6123	2.56265	0.128591	0.610545	0.481953	0.0478279	hyper
23	41661308	41662098	28659929	28659957	1164240	29	791	27.2759	-81.6087	-1.88332	-0.148335	0.36392	0.512255	0.049647	hypo
10	99742987	99743915	14952464	14952501	238029	38	929	24.4474	81.5284	2.50953	0.116003	0.634275	0.518272	0.0472231	hyper
17	68208963	68209593	23180321	23180351	738436	31	631	20.3548	81.5082	2.97617	0.121713	0.624472	0.502759	0.0524978	hyper
11	101856072	101856875	16385337	16385358	327347	22	804	36.5455	-81.4732	-1.96234	-0.20294	0.462781	0.665721	0.0566082	hypo
13	18659318	18659935	17887540	17887567	420356	28	618	22.0714	81.4577	3.27637	0.141433	0.78134	0.639908	0.0443006	hyper
1	79194841	79195475	875234	875257	78806	24	635	26.4583	-81.4375	-2.7501	-0.153055	0.381009	0.534063	0.0487564	hypo
23	40130875	40131582	28631361	28631394	1163297	34	708	20.8235	-81.2701	-1.99738	-0.109842	0.622921	0.732763	0.0513192	hypo
3	37444483	37445947	4008696	4008726	1438219	31	1465	47.2581	81.2358	2.87903	0.105316	0.713457	0.608142	0.044525	hyper
X	125693248	125694115	34555235	34555263	2257939	29	868	29.931	81.2219	3.61993	0.10851	0.737928	0.629418	0.039838	hyper
19	59784810	59785470	25167165	25167191	832806	27	661	24.4815	-81.1437	-1.83015	-0.127635	0.480112	0.607747	0.0483042	hypo
23	43917317	43918357	28704381	28704410	1165485	30	1041	34.7	81.0918	3.0917	0.15871	0.788432	0.629722	0.0524038	hyper
9	101301529	101302332	13597772	13597803	2138526	32	804	25.125	81.0519	3.31037	0.113459	0.723475	0.610016	0.0461509	hyper
15	40143368	40144221	20545397	20545425	574366	29	854	29.4483	-81.01	-2.03219	-0.143156	0.288983	0.432139	0.0494864	hypo
10	97223210	97224044	14916767	14916790	235877	24	835	34.7917	80.9765	4.2413	0.179468	0.510315	0.330847	0.0496515	hyper
11	10237766	10238130	15198669	15198697	246766	29	365	12.5862	-80.9225	-1.84538	-0.133557	0.156642	0.290198	0.0488345	hypo
10	16966959	16967722	13908858	13908887	164312	30	764	25.4667	-80.9139	-1.85792	-0.118963	0.481032	0.599995	0.0533374	hypo
5	19467669	19468828	6791754	6791779	1643146	26	1160	44.6154	-80.8366	-1.97352	-0.164588	0.566843	0.731431	0.0504091	hypo
X	134433534	134434026	34683429	34683459	2264711	31	493	15.9032	80.8119	3.10053	0.163734	0.773599	0.609865	0.058876	hyper
9	39146688	39147515	12785047	12785084	2081722	38	828	21.7895	-80.7914	-1.83977	-0.121503	0.432947	0.55445	0.0744142	hypo
14	3927983	3929386	18956558	18956592	470563	35	1404	40.1143	80.7697	2.74378	0.122298	0.655054	0.532756	0.0461841	hyper
7	91643657	91644300	10616622	10616638	1924705	17	644	37.8824	-80.7548	-4.46539	-0.296471	0.4328	0.729271	0.0512148	hypo
5	97110471	97110822	7735161	7735194	1715588	34	352	10.3529	-80.628	-1.83863	-0.100108	0.534127	0.634235	0.0515678	hypo
29	47393990	47394667	33255642	33255665	1403072	24	678	28.25	-80.6204	-2.02938	-0.169604	0.366308	0.535911	0.0551359	hypo
18	7121814	7122606	23381742	23381767	745695	26	793	30.5	-80.4686	-2.60246	-0.142549	0.392296	0.534846	0.0479096	hypo
8	111040419	111041023	12290854	12290876	2042493	23	605	26.3043	-80.4673	-2.30609	-0.191438	0.478004	0.669442	0.0554734	hypo
24	57697619	57698136	29737786	29737810	1217068	25	518	20.72	80.4435	4.25589	0.161369	0.683006	0.521637	0.0471594	hyper
X	135595905	135596664	34709891	34709922	2265161	32	760	23.75	-80.2672	-1.94476	-0.109709	0.547353	0.657062	0.0452931	hypo
5	100498280	100499036	7775988	7776018	1718613	31	757	24.4194	-80.219	-1.89933	-0.128595	0.0830211	0.211616	0.0568414	hypo
13	80644754	80645140	18837459	18837490	466726	32	387	12.0938	80.1677	2.62613	0.148739	0.704005	0.555267	0.0528539	hyper
1	73854213	73854689	814929	814944	73495	16	477	29.8125	-79.9102	-4.10109	-0.338215	0.557879	0.896094	0.0494461	hypo
4	10037188	10037564	5162066	5162096	1523261	31	377	12.1613	-79.8802	-1.98784	-0.118687	0.443859	0.562546	0.0573276	hypo
23	45543750	45544315	28737213	28737250	1166400	38	566	14.8947	-79.8404	-1.8433	-0.141017	0.385687	0.526704	0.0611897	hypo
X	138897454	138897991	34781831	34781855	2266625	25	538	21.52	-79.8265	-2.11709	-0.130422	0.705639	0.836061	0.0457111	hypo
26	40478789	40479362	31053791	31053816	1283522	26	574	22.0769	79.7487	3.81106	0.16763	0.493239	0.325609	0.0591588	hyper
16	50044031	50044439	21784734	21784761	656757	28	409	14.6071	-79.7057	-1.89412	-0.147953	0.371938	0.519891	0.0553472	hypo
3	9024809	9025230	3644047	3644072	1413100	26	422	16.2308	79.5329	3.8192	0.131265	0.501477	0.370212	0.0450359	hyper
20	15019313	15020419	25478859	25478890	973852	32	1107	34.5938	-79.5206	-2.20136	-0.104274	0.554393	0.658667	0.0464492	hypo
18	43041139	43042510	23903156	23903186	774070	31	1372	44.2581	79.452	2.76784	0.151173	0.74102	0.589848	0.0485521	hyper
24	58783203	58783695	29763491	29763520	1217543	30	493	16.4333	79.421	3.03957	0.146839	0.697013	0.550174	0.0548336	hyper
4	69559157	69559995	5872397	5872424	1581357	28	839	29.9643	-79.3844	-1.9095	-0.135508	0.43905	0.574558	0.0483307	hypo
7	94380911	94381467	10653458	10653483	1927198	26	557	21.4231	-79.3792	-2.66384	-0.143288	0.689516	0.832804	0.0511739	hypo
4	119692488	119693115	6557595	6557624	1623858	30	628	20.9333	79.3528	3.05994	0.113711	0.697119	0.583408	0.0478279	hyper
19	51475149	51475709	25014425	25014448	828287	24	561	23.375	-79.3359	-2.41703	-0.162622	0.452193	0.614816	0.0529593	hypo
29	48265996	48266496	33271888	33271911	1403537	24	501	20.875	-79.2931	-2.29599	-0.143757	0.573251	0.717008	0.0481852	hypo
4	116753080	116753523	6498486	6498515	1622235	30	444	14.8	-79.2714	-1.8614	-0.110374	0.701054	0.811429	0.0506645	hypo
27	14080107	14080814	31453255	31453282	1301869	28	708	25.2857	-79.2418	-1.83227	-0.128374	0.507023	0.635397	0.0463708	hypo
23	16038759	16039614	28305526	28305553	1143602	28	856	30.5714	79.2355	3.54385	0.149681	0.807325	0.657644	0.0509416	hyper
16	41287767	41288452	21656018	21656050	650624	33	686	20.7879	-79.235	-1.95477	-0.12698	0.429402	0.556382	0.0540388	hypo
4	107653301	107654152	6357758	6357782	1615503	25	852	34.08	-79.2273	-1.88745	-0.124153	0.356974	0.481128	0.051782	hypo
21	25195600	25195926	26552648	26552671	1046182	24	327	13.625	-79.2208	-2.85958	-0.15615	0.516216	0.672366	0.0473124	hypo
8	107080274	107081055	12220817	12220846	2039717	30	782	26.0667	-79.1857	-1.86596	-0.11577	0.355436	0.471206	0.0496148	hypo
12	18046440	18046944	16694701	16694730	345964	30	505	16.8333	79.1243	3.30471	0.103827	0.604448	0.500621	0.0467658	hyper
3	115109279	115109986	4938466	4938497	1511224	32	708	22.125	-79.1139	-1.83957	-0.100453	0.760892	0.861345	0.0436257	hypo
23	51462459	51463050	28867087	28867117	1169556	31	592	19.0968	-79.1057	-1.87929	-0.1368	0.635236	0.772036	0.0578699	hypo
28	31665113	31666108	32380213	32380238	1353544	26	996	38.3077	-79.0726	-1.96031	-0.123508	0.526787	0.650296	0.0479959	hypo
16	20366113	20367262	21380983	21381012	631789	30	1150	38.3333	-79.0669	-1.96945	-0.154514	0.615912	0.770426	0.0557095	hypo
9	102063047	102063412	13615008	13615029	2138911	22	366	16.6364	79.0492	4.87741	0.164953	0.596388	0.431435	0.0478768	hyper
26	45896835	45897806	31153602	31153626	1286675	25	972	38.88	78.9717	4.28839	0.192869	0.622949	0.43008	0.0538266	hyper
22	17816915	17817732	27439773	27439796	1096772	24	818	34.0833	-78.9695	-2.07832	-0.137303	0.468191	0.605493	0.0504822	hypo
12	19079934	19080805	16710319	16710341	346825	23	872	37.913	78.8637	4.32151	0.220693	0.640039	0.419345	0.0540642	hyper
22	60644510	60645496	28070126	28070158	1130904	33	987	29.9091	-78.8523	-1.97062	-0.139985	0.507954	0.647939	0.0629795	hypo
6	104678187	104679594	9289586	9289623	1833367	38	1408	37.0526	-78.8251	-1.894	-0.109233	0.797838	0.907072	0.0476148	hypo
9	103372641	103372988	13642622	13642653	2139627	32	348	10.875	78.8063	2.85656	0.110837	0.862763	0.751926	0.0443051	hyper
11	88608980	88609551	16176565	16176594	318056	30	572	19.0667	-78.7376	-1.83782	-0.138693	0.45436	0.593053	0.0546188	hypo
5	48270551	48271154	7147223	7147250	1669634	28	604	21.5714	-78.6941	-1.99956	-0.1184	0.453944	0.572345	0.0563276	hypo
29	29557724	29558348	32978511	32978543	1390845	33	625	18.9394	78.6218	2.626	0.11516	0.844112	0.728952	0.0547607	hyper
22	47556811	47558083	27851810	27851829	1122555	20	1273	63.65	78.6178	4.57653	0.203472	0.686019	0.482546	0.0459313	hyper
19	7754305	7755511	24330443	24330473	797182	31	1207	38.9355	78.5646	3.07438	0.14364	0.869316	0.725676	0.0460403	hyper
3	25312501	25314052	3852081	3852101	1427418	21	1552	73.9048	78.5348	5.32864	0.282897	0.880332	0.597435	0.0592632	hyper
12	47913177	47914265	17094828	17094853	371907	26	1089	41.8846	-78.4997	-2.71303	-0.146724	0.416965	0.563689	0.048785	hypo
11	102157396	102157876	16392070	16392089	327481	20	481	24.05	78.464	5.66762	0.194711	0.842102	0.647392	0.0458922	hyper
10	5144877	5145846	13731407	13731426	155117	20	970	48.5	78.4594	4.45331	0.223983	0.484007	0.260024	0.0509144	hyper
8	44078263	44079375	11422562	11422587	1982647	26	1113	42.8077	-78.4513	-2.11314	-0.152903	0.433966	0.586869	0.0483197	hypo
29	31801887	31803297	33014458	33014480	1392394	23	1411	61.3478	-78.4285	-1.91951	-0.237618	0.500556	0.738174	0.0652295	hypo
5	45041209	45042551	7104547	7104579	1666729	33	1343	40.697	78.3954	3.07282	0.117764	0.931824	0.81406	0.0494965	hyper
19	61162325	61163214	25197436	25197465	833497	30	890	29.6667	78.38	3.11599	0.165047	0.922682	0.757636	0.0585934	hyper
24	3147527	3148715	28947121	28947149	1172123	29	1189	41	-78.3566	-1.86382	-0.133065	0.646338	0.779403	0.0489648	hypo
20	16837948	16839565	25498069	25498098	975777	30	1618	53.9333	78.3231	3.15219	0.134621	0.766263	0.631642	0.04553	hyper
24	30249430	30250328	29285909	29285939	1197266	31	899	29	-78.2868	-1.85792	-0.110516	0.646868	0.757384	0.0482892	hypo
21	14821958	14823699	26394475	26394513	1038577	39	1742	44.6667	78.2741	2.23634	0.110795	0.742911	0.632116	0.0493463	hyper
29	47271785	47272511	33253604	33253635	1403003	32	727	22.7188	78.2168	2.77988	0.132583	0.782885	0.650302	0.0521916	hyper
19	50443099	50443795	25000239	25000267	827637	29	697	24.0345	78.158	3.20726	0.121572	0.767196	0.645624	0.0488379	hyper
23	8764409	8764998	28190358	28190388	1138431	31	590	19.0323	78.1418	3.06574	0.147048	0.802244	0.655197	0.0470878	hyper
21	53783983	53785116	26902153	26902170	1072686	18	1134	63	-78.1225	-4.17836	-0.280819	0.311611	0.592429	0.0489205	hypo
22	12862369	12863602	27361899	27361923	1093078	25	1234	49.36	-78.1169	-1.94927	-0.135373	0.595219	0.730593	0.0550982	hypo
16	33944031	33944727	21570255	21570281	643421	27	697	25.8148	-78.097	-1.84875	-0.118486	0.623875	0.742361	0.0447874	hypo
13	18711231	18711990	17888360	17888396	420400	37	760	20.5405	78.0754	2.22785	0.13796	0.835599	0.697639	0.0446163	hyper
11	20956344	20957010	15335676	15335699	256560	24	667	27.7917	78.0327	3.65271	0.182552	0.600298	0.417746	0.0508363	hyper
16	26017544	26018652	21455658	21455687	636871	30	1109	36.9667	-78.0257	-1.88754	-0.115728	0.563945	0.679672	0.056822	hypo
10	6372653	6373303	13749150	13749182	156066	33	651	19.7273	-77.9729	-2.05241	-0.111227	0.380473	0.491701	0.0460355	hypo
4	114416868	114417582	6450975	6451003	1620954	29	715	24.6552	77.9694	3.26887	0.138611	0.592132	0.453521	0.0521613	hyper
21	47444558	47445329	26834774	26834804	1066104	31	772	24.9032	77.9628	3.23952	0.158838	0.784163	0.625325	0.0451343	hyper
9	97798885	97799671	13532479	13532512	2136166	34	787	23.1471	-77.9291	-2.03844	-0.14996	0.624857	0.774817	0.0791078	hypo
4	89129526	89130720	6100326	6100359	1600188	34	1195	35.1471	77.9274	2.79621	0.125627	0.867996	0.742369	0.0538543	hyper
13	76209703	76210376	18741762	18741791	464546	30	674	22.4667	-77.8715	-1.90612	-0.12001	0.495905	0.615915	0.0453733	hypo
24	58269435	58270107	29751480	29751504	1217314	25	673	26.92	-77.7738	-1.85103	-0.128319	0.347749	0.476067	0.0481284	hypo
22	40108598	40109113	27742168	27742189	1116453	22	516	23.4545	-77.6125	-1.93807	-0.229903	0.264206	0.494108	0.0719791	hypo
4	20929793	20931082	5302447	5302468	1533340	22	1290	58.6364	-77.4644	-1.91939	-0.142692	0.519729	0.662421	0.0552845	hypo
6	101566056	101567291	9241444	9241470	1831177	27	1236	45.7778	-77.4345	-1.97946	-0.172641	0.576969	0.749609	0.0461347	hypo
11	104862684	104863587	16434035	16434053	328910	19	904	47.5789	-77.1956	-2.13511	-0.202546	0.380048	0.582593	0.0523028	hypo
20	10365712	10366230	25415941	25415956	969681	16	519	32.4375	77.0475	7.25605	0.265071	0.825802	0.560731	0.0503021	hyper
20	56600920	56601636	25950450	25950478	1014923	29	717	24.7241	-77.032	-1.8483	-0.128825	0.649208	0.778033	0.0605532	hypo
10	84406508	84406844	14730787	14730810	225461	24	337	14.0417	-77.0246	-1.90933	-0.125364	0.125528	0.250892	0.0455565	hypo
10	5986321	5986816	13744144	13744159	155715	16	496	31	-76.985	-2.62104	-0.290876	0.503539	0.794415	0.0526083	hypo
20	20525300	20526080	25546300	25546337	979175	38	781	20.5526	-76.9783	-1.83916	-0.118153	0.659711	0.777864	0.0554425	hypo
20	7230482	7231697	25367108	25367133	967226	26	1216	46.7692	-76.7662	-2.03596	-0.139934	0.611936	0.75187	0.0461624	hypo
13	4001526	4002561	17668655	17668687	408563	33	1036	31.3939	-76.7099	-1.83944	-0.129906	0.443818	0.573724	0.0663335	hypo
3	110420045	110420872	4860179	4860208	1508118	30	828	27.6	-76.6736	-2.07587	-0.12371	0.460576	0.584286	0.0492908	hypo
13	71651437	71652226	18664911	18664933	461615	23	790	34.3478	-76.6432	-2.04209	-0.150212	0.569133	0.719345	0.0518682	hypo
18	60439670	60440749	24167104	24167132	786211	29	1080	37.2414	76.5369	3.29145	0.135771	0.728395	0.592624	0.0480009	hyper
8	104113916	104114380	12172495	12172524	2037630	30	465	15.5	76.4178	2.77286	0.245935	0.531052	0.285116	0.0993199	hyper
21	16472882	16473387	26422451	26422480	1039667	30	506	16.8667	76.4023	2.81491	0.115257	0.847371	0.732114	0.0458412	hyper
10	67269336	67269956	14497973	14497995	210493	23	621	27	-76.3675	-1.90139	-0.138476	0.436044	0.57452	0.0492851	hypo
10	25078801	25079474	13996102	13996129	170035	28	674	24.0714	76.3626	2.8409	0.181498	0.659779	0.478281	0.0568187	hyper
7	109452406	109453137	10867906	10867934	1940285	29	732	25.2414	76.3542	3.32273	0.110555	0.773874	0.663319	0.0520243	hyper
2	79641916	79643559	2775391	2775418	913542	28	1644	58.7143	76.3076	4.13962	0.11993	0.659508	0.539578	0.0440452	hyper
27	1267974	1268293	31281490	31281500	1290583	11	320	29.0909	76.2938	7.71301	0.379154	0.779802	0.400648	0.0485037	hyper
16	64831050	64831445	21985288	21985312	668974	25	396	15.84	-76.2661	-1.85591	-0.142463	0.397382	0.539846	0.0464326	hypo
22	28106408	28107519	27566511	27566539	1106510	29	1112	38.3448	-76.2388	-1.83984	-0.109488	0.493612	0.603101	0.04505	hypo
21	52541789	52543281	26890193	26890223	1071392	31	1493	48.1613	76.211	2.86044	0.145372	0.659036	0.513663	0.0522818	hyper
14	27967952	27969315	19324431	19324449	489084	19	1364	71.7895	76.1171	5.00768	0.297421	0.638829	0.341408	0.0648143	hyper
6	61099318	61100276	8783644	8783661	1791398	18	959	53.2778	76.1133	5.04524	0.195434	0.635582	0.440148	0.0492794	hyper
13	75503791	75504575	18727151	18727180	464178	30	785	26.1667	76.1132	3.02421	0.120483	0.652677	0.532194	0.0442323	hyper
14	54799616	54800486	19647839	19647863	514758	25	871	34.84	-76.0771	-2.18519	-0.118591	0.546543	0.665134	0.0505787	hypo
13	66675718	66676736	18586052	18586084	458174	33	1019	30.8788	-76.0376	-1.83365	-0.142186	0.811543	0.953729	0.0448049	hypo
23	20851824	20853160	28380950	28380975	1147076	26	1337	51.4231	-76.019	-1.89025	-0.167168	0.599215	0.766382	0.0537863	hypo
10	48932835	48933574	14277910	14277938	192944	29	740	25.5172	-75.9079	-1.88498	-0.110749	0.616845	0.727594	0.0468246	hypo
3	118474506	118475272	5005385	5005411	1513006	27	767	28.4074	75.8755	3.45422	0.131089	0.906559	0.77547	0.0509424	hyper
5	230517	231220	6565582	6565617	1624161	36	704	19.5556	-75.8674	-1.83463	-0.112207	0.632654	0.744862	0.0449092	hypo
22	60428949	60429581	28066969	28067002	1130787	34	633	18.6176	75.8295	2.47101	0.108553	0.552794	0.444242	0.0449801	hyper
28	3592440	3593329	32016095	32016117	1328332	23	890	38.6957	-75.8281	-1.93596	-0.123493	0.287799	0.411293	0.0482556	hypo
5	42840665	42841659	7077807	7077826	1664735	20	995	49.75	-75.7917	-2.34019	-0.207902	0.533932	0.741835	0.0508058	hypo
29	5882928	5883797	32671403	32671430	1369781	28	870	31.0714	-75.7545	-1.90208	-0.131341	0.574513	0.705854	0.0487158	hypo
10	100198612	100198866	14961465	14961490	238290	26	255	9.80769	-75.7152	-1.87234	-0.14384	0.638247	0.782086	0.0520585	hypo
18	27593017	27593567	23698907	23698940	760533	34	551	16.2059	-75.598	-1.95924	-0.100519	0.562051	0.662571	0.0562495	hypo
2	77522529	77523147	2756203	2756230	911337	28	619	22.1071	-75.5812	-1.94268	-0.128385	0.416997	0.545382	0.0504557	hypo
18	40977926	40978585	23869955	23869986	772616	32	660	20.625	-75.5751	-1.83579	-0.117373	0.534431	0.651804	0.0522917	hypo
10	892343	893545	13673202	13673231	151504	30	1203	40.1	75.5722	2.97705	0.122479	0.674038	0.55156	0.0461765	hyper
6	62562257	62563012	8800117	8800134	1792847	18	756	42	75.514	4.62142	0.164328	0.662711	0.498384	0.0477456	hyper
2	77695216	77696472	2757702	2757727	911522	26	1257	48.3462	75.4479	3.58997	0.157784	0.601313	0.443529	0.0454705	hyper
2	18618355	18619053	2085084	2085109	852789	26	699	26.8846	75.4378	3.45114	0.152	0.777165	0.625164	0.044699	hyper
1	78985585	78986578	872020	872044	78647	25	994	39.76	-75.3448	-1.99825	-0.148117	0.765031	0.913148	0.0439277	hypo
11	103279471	103279962	16413976	16413999	328060	24	492	20.5	-75.2759	-1.83112	-0.146036	0.674056	0.820092	0.0455607	hypo
9	85816400	85816823	13332180	13332205	2127587	26	424	16.3077	-75.2254	-1.98494	-0.13685	0.611387	0.748237	0.0500057	hypo
18	62576110	62577750	24197712	24197738	787592	27	1641	60.7778	-75.1201	-1.99961	-0.1339	0.400994	0.534894	0.0658193	hypo
19	50687262	50687764	25003609	25003637	827812	29	503	17.3448	-75.0992	-2.05427	-0.139362	0.690226	0.829588	0.0502263	hypo
13	71536122	71536634	18663029	18663052	461539	24	513	21.375	-75.0779	-2.22107	-0.174082	0.661336	0.835418	0.0467001	hypo
19	5174642	5175962	24294566	24294594	795032	29	1321	45.5517	75.0361	3.19091	0.233427	0.934674	0.701247	0.0465573	hyper
13	70159030	70159540	18641060	18641088	460596	29	511	17.6207	-75.0223	-2.04092	-0.123865	0.626587	0.750452	0.0504907	hypo
14	71405994	71406527	19878891	19878911	528997	21	534	25.4286	-75.0164	-2.53318	-0.148996	0.550454	0.699449	0.0482302	hypo
3	19759760	19760698	3778386	3778419	1422387	34	939	27.6176	-74.9954	-1.91369	-0.14091	0.354175	0.495085	0.0611349	hypo
2	96266720	96267295	2969743	2969766	929781	24	576	24	-74.9811	-1.86724	-0.151492	0.622306	0.773798	0.0490915	hypo
11	104675936	104676407	16431670	16431704	328804	35	472	13.4857	-74.9538	-2.00504	-0.111973	0.639038	0.751011	0.046084	hypo
12	11372829	11373208	16583468	16583488	341193	21	380	18.0952	-74.9477	-2.55838	-0.182585	0.548503	0.731088	0.0555563	hypo
11	83181954	83182727	16095528	16095552	313943	25	774	30.96	74.9177	3.63753	0.290983	0.930391	0.639408	0.0635799	hyper
22	53334088	53334490	27934748	27934774	1126848	27	403	14.9259	-74.9143	-1.84568	-0.175624	0.526306	0.701931	0.0597875	hypo
23	51426793	51427507	28866043	28866067	1169537	25	715	28.6	-74.8195	-1.88287	-0.139302	0.699996	0.839299	0.0474186	hypo
29	4728304	4729603	32657562	32657595	1368690	34	1300	38.2353	74.8061	2.46598	0.125999	0.859131	0.733132	0.0504116	hyper
12	26866107	26866989	16830075	16830100	352902	26	883	33.9615	74.7934	3.73988	0.160058	0.797935	0.637877	0.046468	hyper
13	79578226	79578671	18812214	18812244	466243	31	446	14.3871	-74.7609	-1.96985	-0.103593	0.537413	0.641006	0.0468528	hypo
8	1129731	1130358	10902207	10902237	1942118	31	628	20.2581	-74.7446	-1.98717	-0.10702	0.453833	0.560854	0.0471848	hypo
28	15892700	15893334	32183721	32183752	1338932	32	635	19.8438	74.7234	2.51452	0.117155	0.776474	0.659319	0.046957	hyper
3	84619626	84619967	4516763	4516796	1486205	34	342	10.0588	-74.6951	-1.949	-0.100614	0.609899	0.710513	0.0615458	hypo
13	17494446	17495051	17868135	17868158	419481	24	606	25.25	-74.6894	-2.17464	-0.164078	0.515397	0.679475	0.0548754	hypo
27	40339611	40339880	31874083	31874111	1321737	29	270	9.31034	-74.6842	-2.04819	-0.104042	0.458911	0.562953	0.0454033	hypo
19	17660220	17660774	24493997	24494035	804168	39	555	14.2308	74.6698	2.06504	0.133028	0.704228	0.5712	0.0502926	hyper
22	48661038	48661473	27867941	27867961	1123385	21	436	20.7619	-74.6672	-3.04926	-0.13413	0.545148	0.679279	0.0466607	hypo
13	79315202	79315836	18805816	18805849	466121	34	635	18.6765	74.6538	2.4429	0.126708	0.711965	0.585257	0.0544061	hyper
15	77527345	77527846	21028972	21029001	606960	30	502	16.7333	-74.6243	-2.14955	-0.125743	0.538596	0.664339	0.0513794	hypo
16	31750424	31751337	21539362	21539388	641523	27	914	33.8519	-74.5732	-1.82685	-0.103111	0.673262	0.776373	0.0462013	hypo
22	53463233	53463669	27937490	27937511	1126909	22	437	19.8636	74.5696	3.69812	0.179227	0.745556	0.566329	0.0488314	hyper
23	40610908	40611384	28639892	28639926	1163624	35	477	13.6286	74.5618	2.1941	0.133461	0.787091	0.65363	0.057126	hyper
26	37879259	37879757	31011113	31011141	1281634	29	499	17.2069	-74.5412	-2.24326	-0.129404	0.56162	0.691024	0.0527161	hypo
11	97156270	97156956	16304890	16304918	324528	29	687	23.6897	74.5139	2.70511	0.135045	0.72547	0.590425	0.0618803	hyper
5	33705018	33706547	6982675	6982695	1655398	21	1530	72.8571	74.4233	3.92473	0.157499	0.784623	0.627124	0.0512381	hyper
10	1142546	1143125	13677478	13677510	151673	33	580	17.5758	74.4134	2.82163	0.138361	0.797629	0.659268	0.0491372	hyper
19	22356565	22357186	24569264	24569289	807458	26	622	23.9231	74.4131	3.34437	0.182936	0.680294	0.497358	0.0583002	hyper
5	115880950	115882260	8029790	8029814	1728657	25	1311	52.44	-74.4077	-2.13298	-0.202588	0.586158	0.788746	0.0628533	hypo
12	74412443	74412914	17371756	17371780	397202	25	472	18.88	-74.38	-2.00769	-0.134011	0.286406	0.420417	0.0573717	hypo
23	41560613	41561325	28657668	28657692	1164195	25	713	28.52	-74.3699	-1.82841	-0.169548	0.611018	0.780565	0.0569355	hypo
7	107416708	107417370	10828627	10828656	1938918	30	663	22.1	74.3567	2.72623	0.124235	0.893493	0.769259	0.0507506	hyper
5	110061966	110062743	7927866	7927888	1725137	23	778	33.8261	-74.3094	-1.95919	-0.182882	0.29953	0.482412	0.0565001	hypo
24	33303206	33303896	29335782	29335807	1199531	26	691	26.5769	74.2061	3.48686	0.135174	0.665744	0.53057	0.0464931	hyper
19	22964836	22965498	24579568	24579599	807843	32	663	20.7188	-74.1796	-1.86643	-0.107241	0.504627	0.611867	0.0554278	hypo
20	13096513	13097332	25454286	25454315	972048	30	820	27.3333	74.1733	2.63385	0.119341	0.745834	0.626493	0.0610029	hyper
22	50505887	50506481	27892080	27892105	1124862	26	595	22.8846	-74.1102	-1.93053	-0.160356	0.729563	0.889919	0.0483683	hypo
8	103690680	103691404	12165396	12165424	2037354	29	725	25	74.095	3.02983	0.149579	0.768364	0.618785	0.0489219	hyper
8	109700324	109701121	12260946	12260974	2041799	29	798	27.5172	74.0883	2.82691	0.107404	0.688238	0.580834	0.0479326	hyper
7	3408650	3409617	9527828	9527855	1845365	28	968	34.5714	74.0627	3.056	0.164419	0.624631	0.460212	0.0571232	hyper
X	8277148	8277720	33402172	33402204	2148266	33	573	17.3636	74.018	2.45083	0.116844	0.344286	0.227443	0.050895	hyper
2	124340015	124340280	3326602	3326623	954888	22	266	12.0909	-73.9465	-1.98691	-0.177027	0.611455	0.788481	0.0507621	hypo
3	3246413	3247115	3572056	3572079	1407937	24	703	29.2917	73.9446	3.64877	0.230707	0.848523	0.617816	0.0616553	hyper
10	5553684	5554556	13737552	13737576	155406	25	873	34.92	-73.9438	-1.92066	-0.146482	0.591885	0.738367	0.0475776	hypo
10	26447178	26447808	14013494	14013525	171289	32	631	19.7188	-73.9307	-1.92199	-0.117156	0.207825	0.324981	0.0763087	hypo
5	32321259	32321831	6964801	6964831	1654192	31	573	18.4839	-73.919	-1.90494	-0.111751	0.499726	0.611478	0.0515481	hypo
16	79145586	79146401	22227929	22227958	679305	30	816	27.2	73.8735	2.95798	0.127283	0.706865	0.579582	0.0578251	hyper
2	110446050	110446914	3135307	3135330	943371	24	865	36.0417	-73.7794	-1.84033	-0.113108	0.399275	0.512384	0.0443646	hypo
19	40575285	40575719	24851834	24851864	820279	31	435	14.0323	-73.7743	-1.83702	-0.14377	0.178937	0.322707	0.0593718	hypo
16	52317037	52318444	21814762	21814800	658325	39	1408	36.1026	73.7376	2.0223	0.118025	0.783408	0.665382	0.0528561	hyper
18	56311045	56312012	24104874	24104906	783316	33	968	29.3333	-73.7347	-2.0143	-0.128882	0.504081	0.632963	0.056617	hypo
4	72350718	72351601	5907417	5907440	1583977	24	884	36.8333	73.6733	3.2752	0.149217	0.576709	0.427492	0.0463025	hyper
14	81134713	81135540	20020849	20020882	537383	34	828	24.3529	-73.6257	-1.89763	-0.130899	0.358913	0.489812	0.0530801	hypo
9	21943277	21944352	12576749	12576771	2065109	23	1076	46.7826	73.6003	4.24841	0.170216	0.732827	0.562611	0.0446888	hyper
13	74635324	74636032	18712238	18712260	463659	23	709	30.8261	-73.5969	-2.05107	-0.157173	0.531815	0.688988	0.0562248	hypo
4	118524435	118525153	6536229	6536258	1623177	30	719	23.9667	73.4628	2.56414	0.129923	0.616452	0.486528	0.0477362	hyper
6	68070411	68071574	8859974	8860002	1798509	29	1164	40.1379	-73.4461	-1.87364	-0.112716	0.518818	0.631534	0.0451447	hypo
24	60280510	60280868	29793009	29793032	1218503	24	359	14.9583	-73.4414	-2.06137	-0.124522	0.565409	0.689931	0.0462811	hypo
28	3460411	3461645	32014501	32014528	1328202	28	1235	44.1071	73.433	2.78288	0.168223	0.712366	0.544143	0.0458719	hyper
28	44968318	44968766	32577129	32577163	1363991	35	449	12.8286	-73.4027	-1.82694	-0.11314	0.497124	0.610264	0.0503377	hypo
9	102255086	102255581	13619008	13619030	2139020	23	496	21.5652	-73.3297	-1.88322	-0.160017	0.496634	0.65665	0.0621573	hypo
25	14339578	14340492	30074213	30074240	1228666	28	915	32.6786	73.3028	3.03411	0.185896	0.532102	0.346206	0.0667529	hyper
13	27824530	27825572	18015584	18015603	428262	20	1043	52.15	73.2517	4.45161	0.218845	0.771955	0.55311	0.0499761	hyper
7	83135712	83136555	10516019	10516047	1916444	29	844	29.1034	73.1964	2.68193	0.130757	0.854649	0.723892	0.0470932	hyper
12	16527912	16528348	16673423	16673450	344668	28	437	15.6071	73.191	2.90557	0.197949	0.676324	0.478375	0.0618062	hyper
22	6965997	6966938	27269613	27269640	1088723	28	942	33.6429	-73.1811	-2.09683	-0.170579	0.706091	0.87667	0.0626325	hypo
14	1018818	1019114	18911776	18911803	468787	28	297	10.6071	73.1786	3.14386	0.1536	0.743161	0.58956	0.0514825	hyper
4	59506220	59507556	5739570	5739600	1572285	31	1337	43.129	73.0731	2.79079	0.122932	0.817871	0.694939	0.0467959	hyper
10	1932197	1933282	13688339	13688357	152333	19	1086	57.1579	73.0023	4.35575	0.231155	0.68282	0.451665	0.0449488	hyper
16	77083861	77084742	22183527	22183555	678144	29	882	30.4138	-73.0003	-1.95201	-0.110254	0.688886	0.799141	0.052004	hypo
4	115154476	115154918	6466149	6466178	1621391	30	443	14.7667	-72.9865	-1.9358	-0.165204	0.542647	0.70785	0.0600342	hypo
15	76251030	76251287	21005007	21005025	606178	19	258	13.5789	-72.9505	-3.22783	-0.161258	0.365867	0.527125	0.0476564	hypo
25	14454005	14454526	30076513	30076538	1228716	26	522	20.0769	-72.9129	-2.04999	-0.14948	0.473412	0.622893	0.0471571	hypo
19	18403350	18403999	24506931	24506957	804663	27	650	24.0741	-72.8451	-1.90764	-0.112256	0.583851	0.696107	0.0488352	hypo
2	132188750	132189149	3457553	3457581	960031	29	400	13.7931	-72.8311	-1.82657	-0.106088	0.340839	0.446927	0.0488705	hypo
10	7418221	7418979	13763766	13763783	157005	18	759	42.1667	-72.8278	-2.20875	-0.248643	0.426741	0.675385	0.0469884	hypo
1	144675399	144676785	1636224	1636253	141820	30	1387	46.2333	72.8125	3.47949	0.124663	0.653766	0.529103	0.0496487	hyper
10	102706492	102707341	15017379	15017407	239484	29	850	29.3103	-72.7835	-1.92409	-0.103968	0.758419	0.862387	0.0563974	hypo
13	35993365	35993665	18136584	18136614	434762	31	301	9.70968	-72.7206	-1.8367	-0.122905	0.154387	0.277292	0.052054	hypo
10	100866903	100867478	14975524	14975549	238646	26	576	22.1538	72.7057	3.15225	0.131045	0.767423	0.636378	0.0443878	hyper
5	98334382	98334977	7755039	7755066	1716487	28	596	21.2857	72.6916	3.10809	0.128616	0.69534	0.566725	0.0537328	hyper
X	5115803	5116478	33369517	33369543	2145059	27	676	25.037	-72.6084	-1.83862	-0.114615	0.27808	0.392696	0.0473008	hypo
3	15561445	15561994	3722082	3722113	1418937	32	550	17.1875	-72.5924	-2.00463	-0.128304	0.470347	0.598652	0.0652485	hypo
5	25953777	25954373	6878875	6878906	1648935	32	597	18.6562	72.5491	2.53629	0.153657	0.642976	0.489319	0.0556633	hyper
23	25980894	25981886	28443961	28443988	1151614	28	993	35.4643	-72.3855	-1.85356	-0.138879	0.553679	0.692558	0.0504673	hypo
X	30123428	30123695	33559804	33559826	2162955	23	268	11.6522	72.369	3.19	0.165622	0.786043	0.620421	0.0512159	hyper
22	6531707	6532795	27260750	27260776	1088497	27	1089	40.3333	-72.2934	-2.08713	-0.131466	0.615324	0.74679	0.0529074	hypo
23	52278909	52279217	28883928	28883947	1170015	20	309	15.45	72.2757	4.2677	0.195285	0.671118	0.475833	0.0498687	hyper
29	49841684	49842393	33293680	33293705	1404346	26	710	27.3077	72.2745	3.54344	0.105367	0.562676	0.45731	0.0521019	hyper
23	42469562	42470040	28676142	28676165	1164652	24	479	19.9583	-72.2381	-2.12066	-0.107409	0.321674	0.429084	0.0476928	hypo
17	20641575	20641932	22542671	22542684	698000	14	358	25.5714	72.2223	5.39534	0.335916	0.731564	0.395648	0.0471811	hyper
6	36978423	36979026	8519048	8519078	1767377	31	604	19.4839	72.2214	2.5578	0.15527	0.837235	0.681964	0.0563383	hyper
13	23781589	23782538	17957881	17957909	424869	29	950	32.7586	72.1775	2.98866	0.134668	0.606908	0.47224	0.0525433	hyper
13	83015062	83015923	18892735	18892756	467859	22	862	39.1818	-72.1634	-2.10113	-0.153687	0.53337	0.687057	0.0456926	hypo
27	36845145	36845626	31802534	31802565	1319780	32	482	15.0625	-72.1163	-1.87303	-0.102565	0.580478	0.683043	0.0496127	hypo
23	50330098	50330707	28840526	28840560	1168957	35	610	17.4286	72.0425	2.33791	0.121496	0.767246	0.64575	0.0559798	hyper
18	52015806	52016743	24032682	24032715	780743	34	938	27.5882	72.0353	2.38033	0.113331	0.780979	0.667648	0.052627	hyper
10	100197822	100198109	14961445	14961464	238289	20	288	14.4	-72.0317	-2.41754	-0.17899	0.558355	0.737346	0.0520585	hypo
28	2912153	2912478	32008296	32008313	1327701	18	326	18.1111	72.0249	5.47643	0.220089	0.714347	0.494258	0.0532672	hyper
4	4212869	4213396	5078121	5078148	1518690	28	528	18.8571	-71.9591	-2.13213	-0.113071	0.373527	0.486598	0.0485289	hypo
7	21062205	21062881	9767404	9767431	1858580	28	677	24.1786	71.9509	2.70234	0.122554	0.566243	0.443689	0.0552551	hyper
8	64418492	64419100	11662094	11662121	2002040	28	609	21.75	-71.9411	-1.93584	-0.140064	0.339891	0.479955	0.0617305	hypo
13	38722668	38723455	18179196	18179215	436797	20	788	39.4	71.9385	4.10613	0.207538	0.694496	0.486959	0.0476258	hyper
3	23265829	23266851	3826523	3826550	1425494	28	1023	36.5357	-71.9288	-2.02728	-0.126396	0.54084	0.667236	0.0459026	hypo
24	17434110	17435995	29123497	29123529	1185534	33	1886	57.1515	71.9123	2.43325	0.164491	0.822525	0.658034	0.0527414	hyper
X	90317088	90317488	34163286	34163302	2223200	17	401	23.5882	71.893	4.69302	0.196361	0.571954	0.375593	0.0397302	hyper
5	109337717	109338392	7916802	7916829	1724667	28	676	24.1429	-71.8901	-1.82717	-0.111888	0.638792	0.750679	0.0447022	hypo
23	16144410	16145067	28307459	28307494	1143659	36	658	18.2778	71.8524	2.20907	0.11646	0.517465	0.401005	0.0482974	hyper
26	21998238	21998986	30797095	30797124	1268139	30	749	24.9667	-71.8325	-1.85227	-0.112811	0.692512	0.805323	0.0518654	hypo
9	103540220	103540897	13646081	13646114	2139733	34	678	19.9412	-71.8123	-1.84009	-0.115705	0.504481	0.620186	0.0453753	hypo
8	76846848	76848447	11820036	11820068	2013154	33	1600	48.4848	-71.8024	-1.84511	-0.167902	0.703194	0.871096	0.0555145	hypo
9	89945234	89945925	13395001	13395029	2130795	29	692	23.8621	-71.6671	-1.93301	-0.119802	0.311884	0.431686	0.0465199	hypo
25	39063416	39063901	30470811	30470839	1246082	29	486	16.7586	-71.6582	-1.86121	-0.104252	0.468875	0.573127	0.0465849	hypo
X	42702354	42703403	33694079	33694104	2174641	26	1050	40.3846	-71.6518	-2.15774	-0.105184	0.433959	0.539143	0.0482452	hypo
7	109011970	109012528	10858079	10858105	1940036	27	559	20.7037	-71.651	-1.93478	-0.109441	0.62818	0.737621	0.048251	hypo
9	38384198	38385029	12773749	12773783	2081092	35	832	23.7714	71.6489	2.2324	0.154026	0.629161	0.475135	0.0611015	hyper
17	70509708	70510532	23221027	23221051	739756	25	825	33	-71.6425	-2.17644	-0.122306	0.478279	0.600584	0.0473437	hypo
1	117957744	117958233	1310261	1310286	117223	26	490	18.8462	-71.642	-2.44617	-0.134936	0.740595	0.875531	0.0457227	hypo
15	21580784	21581355	20273392	20273421	559784	30	572	19.0667	-71.5976	-1.88771	-0.12555	0.55996	0.68551	0.0646369	hypo
21	30297623	30298207	26625249	26625264	1050148	16	585	36.5625	-71.5934	-2.23883	-0.261458	0.580532	0.841989	0.0480119	hypo
4	113723063	113723733	6438519	6438540	1620608	22	671	30.5	71.4962	3.68414	0.15901	0.617194	0.458184	0.0544035	hyper
29	7458666	7459393	32691800	32691827	1371232	28	728	26	71.4271	2.87017	0.219307	0.79983	0.580523	0.0561746	hyper
15	62810083	62811135	20815975	20815993	594980	19	1053	55.4211	71.4244	4.87395	0.181424	0.805545	0.624121	0.0478145	hyper
1	118836960	118837939	1321937	1321966	118036	30	980	32.6667	71.3629	3.12703	0.107551	0.336266	0.228715	0.0536701	hyper
12	84096975	84097455	17550970	17550993	403501	24	481	20.0417	-71.3505	-2.05155	-0.121169	0.523176	0.644345	0.0457269	hypo
20	70360647	70361342	26172063	26172092	1025083	30	696	23.2	-71.3311	-1.84914	-0.113948	0.584664	0.698612	0.0502765	hypo
19	7402071	7403670	24323869	24323902	796971	34	1600	47.0588	71.3095	2.57034	0.147862	0.753298	0.605435	0.054686	hyper
11	63597037	63598083	15830653	15830685	297193	33	1047	31.7273	71.2858	2.36807	0.136064	0.661607	0.525543	0.0455686	hyper
10	86467274	86468334	14761479	14761506	227092	28	1061	37.8929	-71.2289	-1.84206	-0.115082	0.502249	0.617331	0.0461186	hypo
13	54962979	54963353	18401104	18401129	449961	26	375	14.4231	-71.2184	-2.0764	-0.123912	0.694814	0.818726	0.0473767	hypo
13	61785588	61786237	18512029	18512054	454598	26	650	25	-71.1947	-1.91625	-0.137472	0.501063	0.638535	0.0488484	hypo
14	76099714	76100544	19938381	19938407	533508	27	831	30.7778	-71.173	-1.98209	-0.103967	0.503681	0.607648	0.0518423	hypo
12	75741887	75743313	17398146	17398162	397954	17	1427	83.9412	-71.1482	-1.83614	-0.247958	0.543126	0.791084	0.0534199	hypo
18	48412235	48413117	23976654	23976682	778429	29	883	30.4483	-71.0957	-1.93594	-0.126888	0.39227	0.519157	0.0492035	hypo
27	42766359	42766946	31926545	31926570	1323035	26	588	22.6154	-70.9795	-1.97166	-0.136425	0.657649	0.794074	0.0533968	hypo
1	70568583	70568793	770663	770673	70663	11	211	19.1818	-70.9686	-6.29032	-0.165206	0.32045	0.485656	0.0462139	hypo
14	23209631	23210215	19254511	19254536	485202	26	585	22.5	-70.8504	-1.89743	-0.135103	0.521101	0.656205	0.050761	hypo
X	138814452	138815095	34779886	34779912	2266598	27	644	23.8519	-70.815	-1.97918	-0.13393	0.576894	0.710824	0.0481763	hypo
1	107926230	107926887	1194766	1194798	107346	33	658	19.9394	70.814	2.42901	0.132672	0.80184	0.669168	0.0464635	hyper
20	17161422	17162262	25502487	25502509	976066	23	841	36.5652	70.7588	3.91265	0.143006	0.67686	0.533853	0.046315	hyper
19	20409898	20411056	24538563	24538586	806056	24	1159	48.2917	-70.7025	-1.85647	-0.206588	0.562015	0.768603	0.0604487	hypo
9	19055270	19056137	12541273	12541298	2062338	26	868	33.3846	-70.6842	-1.8362	-0.107792	0.535938	0.64373	0.0452614	hypo
11	45567290	45568227	15630595	15630622	279660	28	938	33.5	70.6755	3.09718	0.156789	0.558771	0.401982	0.054487	hyper
7	10051425	10051841	9618277	9618308	1850435	32	417	13.0312	-70.6608	-1.90806	-0.134885	0.55528	0.690165	0.0468001	hypo
9	50621556	50622525	12919060	12919084	2093095	25	970	38.8	70.6584	3.84989	0.136813	0.601701	0.464888	0.0486453	hyper
25	17292265	17292929	30119638	30119662	1230907	25	665	26.6	-70.6419	-2.18392	-0.141431	0.318365	0.459796	0.0525153	hypo
27	1272694	1273377	31281605	31281625	1290586	21	684	32.5714	70.6156	4.70425	0.195124	0.833392	0.638268	0.0466665	hyper
25	37820730	37821586	30445631	30445656	1245428	26	857	32.9615	70.5673	2.97399	0.169937	0.765323	0.595385	0.0562773	hyper
17	5382290	5383139	22323450	22323465	685263	16	850	53.125	-70.5415	-3.6851	-0.289961	0.412447	0.702408	0.0542005	hypo
22	37317940	37318757	27699041	27699069	1114268	29	818	28.2069	70.5177	3.06591	0.125283	0.651111	0.525828	0.0500532	hyper
X	49933058	49933754	33762093	33762119	2182151	27	697	25.8148	70.4122	2.9657	0.202037	0.541188	0.339151	0.0707124	hyper
3	4434884	4435854	3589792	3589818	1408890	27	971	35.963	70.3875	2.83565	0.142209	0.691194	0.548986	0.0522774	hyper
23	25309397	25310317	28437228	28437258	1151103	31	921	29.7097	70.2938	2.65104	0.141986	0.763436	0.62145	0.0478277	hyper
X	133568945	133569689	34663953	34663981	2264374	29	745	25.6897	70.2795	2.74911	0.136068	0.826679	0.690611	0.0457381	hyper
13	81123643	81124192	18850314	18850339	466878	26	550	21.1538	-70.2585	-2.02032	-0.101919	0.290924	0.392843	0.0487709	hypo
19	13021183	13021633	24413850	24413867	801212	18	451	25.0556	-70.2427	-2.023	-0.18429	0.341247	0.525538	0.049254	hypo
17	52423466	52423743	22907967	22907987	728142	21	278	13.2381	70.1507	3.61911	0.172142	0.772173	0.600031	0.0535534	hyper
20	40997651	40998336	25795173	25795196	998879	24	686	28.5833	-70.1381	-1.98727	-0.177511	0.284275	0.461785	0.0527375	hypo
21	24724352	24725179	26545787	26545813	1045790	27	828	30.6667	-70.1283	-1.84087	-0.138193	0.417897	0.556089	0.0531225	hypo
4	102613248	102613905	6282486	6282508	1611716	23	658	28.6087	-70.1185	-1.91468	-0.129914	0.103807	0.233721	0.0457941	hypo
18	53797368	53797749	24061289	24061315	781859	27	382	14.1481	70.0973	2.75807	0.16464	0.708702	0.544061	0.0501665	hyper
9	59331924	59332986	13004718	13004743	2102353	26	1063	40.8846	-70.0945	-1.8991	-0.117631	0.390798	0.508429	0.0511074	hypo
9	76164174	76164958	13213698	13213713	2118466	16	785	49.0625	-70.0768	-1.90747	-0.237353	0.510658	0.748011	0.0504832	hypo
6	111013636	111014512	9375034	9375060	1838792	27	877	32.4815	70.0626	2.87331	0.197597	0.643412	0.445815	0.056845	hyper
11	41917574	41919122	15583314	15583335	276475	22	1549	70.4091	-70.0411	-1.85964	-0.180554	0.472504	0.653057	0.0468776	hypo
X	32967494	32968232	33593992	33594013	2165560	22	739	33.5909	-70.0334	-2.71909	-0.118545	0.573183	0.691728	0.0461583	hypo
8	1190764	1191433	10903485	10903503	1942150	19	670	35.2632	70.0251	4.0686	0.23483	0.849287	0.614457	0.0476056	hyper
1	86812811	86813704	969152	969171	85948	20	894	44.7	69.9839	3.82839	0.162524	0.650669	0.488145	0.058061	hyper
8	100555655	100556320	12115573	12115599	2034996	27	666	24.6667	-69.9809	-1.83093	-0.114701	0.449815	0.564515	0.0454185	hypo
1	77026279	77026994	849932	849957	76709	26	716	27.5385	69.9688	2.94336	0.169103	0.61231	0.443206	0.0442172	hyper
10	9715037	9715733	13801878	13801910	158696	33	697	21.1212	69.9289	2.28827	0.101443	0.900836	0.799394	0.0460523	hyper
12	51062232	51063356	17133642	17133669	374928	28	1125	40.1786	69.9181	2.90992	0.114027	0.69472	0.580693	0.0571815	hyper
13	81758302	81758949	18866072	18866100	467150	29	648	22.3448	69.869	2.56329	0.144555	0.74698	0.602424	0.0522382	hyper
11	105163207	105163752	16436679	16436710	329067	32	546	17.0625	-69.832	-1.89488	-0.113118	0.539318	0.652436	0.049756	hypo
19	58510651	58511377	25137556	25137583	832207	28	727	25.9643	69.8211	3.09306	0.117117	0.479572	0.362454	0.0539569	hyper
8	112919647	112920121	12328370	12328393	2043543	24	475	19.7917	-69.7558	-2.08916	-0.138514	0.209217	0.347731	0.0581692	hypo
19	61518039	61518547	25207121	25207147	833640	27	509	18.8519	-69.739	-1.97512	-0.140314	0.577283	0.717598	0.0604477	hypo
11	84846946	84847874	16114385	16114400	315521	16	929	58.0625	69.7184	4.81575	0.293848	0.699307	0.405458	0.0534847	hyper
12	16216200	16216907	16667773	16667799	344486	27	708	26.2222	-69.7148	-1.86369	-0.116722	0.756035	0.872757	0.0458001	hypo
20	58695265	58695800	25981803	25981824	1016564	22	536	24.3636	-69.7056	-1.9039	-0.158042	0.596924	0.754966	0.0556325	hypo
16	45481660	45481986	21721164	21721186	653619	23	327	14.2174	-69.6618	-2.46692	-0.133321	0.559363	0.692684	0.0482772	hypo
9	103934510	103935128	13652580	13652607	2139974	28	619	22.1071	-69.6446	-1.85098	-0.107934	0.50259	0.610524	0.0539644	hypo
20	70045902	70046339	26165219	26165252	1024923	34	438	12.8824	-69.6113	-1.85565	-0.115678	0.194656	0.310334	0.0511199	hypo
1	148195875	148196819	1687915	1687940	144402	26	945	36.3462	-69.6076	-1.96679	-0.124817	0.528495	0.653312	0.0503575	hypo
10	4212174	4212812	13716896	13716918	154383	23	639	27.7826	-69.532	-1.85439	-0.178933	0.49621	0.675143	0.0555414	hypo
9	87416482	87417809	13356140	13356166	2128800	27	1328	49.1852	69.5206	2.92033	0.141995	0.808791	0.666796	0.0478514	hyper
X	135740251	135740733	34712982	34713009	2265226	28	483	17.25	-69.4382	-1.82975	-0.120408	0.576761	0.697169	0.0515483	hypo
6	115994221	115995022	9457987	9458003	1841657	17	802	47.1765	69.4011	5.46854	0.251673	0.834849	0.583176	0.053407	hyper
16	60065958	60066809	21915975	21916000	665095	26	852	32.7692	-69.3923	-1.95092	-0.119332	0.664627	0.78396	0.0479464	hypo
17	59359221	59360427	23018595	23018624	733130	30	1207	40.2333	69.3676	3.0432	0.122754	0.663391	0.540637	0.046562	hyper
1	82819801	82820424	924020	924041	81973	22	624	28.3636	-69.3172	-1.988	-0.121301	0.721147	0.842448	0.0476241	hypo
9	9132165	9132696	12418381	12418397	2053159	17	532	31.2941	-69.3081	-3.46469	-0.246254	0.482214	0.728468	0.0562919	hypo
3	117136610	117137287	4980943	4980966	1512227	24	678	28.25	-69.2778	-1.91379	-0.113277	0.67559	0.788867	0.0444657	hypo
27	7158188	7159150	31365513	31365538	1295445	26	963	37.0385	-69.2605	-1.94615	-0.169282	0.591412	0.760694	0.0522515	hypo
11	87112588	87113487	16150055	16150071	317125	17	900	52.9412	69.243	5.09929	0.199489	0.744509	0.54502	0.047232	hyper
11	61840621	61841247	15807999	15808026	295540	28	627	22.3929	-69.2345	-1.83631	-0.114611	0.489157	0.603768	0.0518745	hypo
21	68300177	68300772	27143254	27143282	1082490	29	596	20.5517	-69.1724	-1.82843	-0.162755	0.32071	0.483465	0.0596825	hypo
18	7030200	7030718	23379970	23379993	745635	24	519	21.625	-69.152	-2.1407	-0.138396	0.515376	0.653771	0.0480791	hypo
25	42291131	42291700	30527390	30527412	1247804	23	570	24.7826	69.1516	3.30848	0.126671	0.661396	0.534725	0.0536999	hyper
3	58494139	58494591	4235426	4235449	1459604	24	453	18.875	-69.1129	-2.04042	-0.143578	0.388913	0.532491	0.0493376	hypo
23	24407770	24408761	28422829	28422852	1150437	24	992	41.3333	69.1027	3.88444	0.192606	0.632894	0.440288	0.0477636	hyper
2	122270274	122270977	3298103	3298124	953281	22	704	32	-69.0916	-2.18247	-0.147445	0.439378	0.586823	0.0488742	hypo
10	88847293	88847614	14802337	14802357	228603	21	322	15.3333	69.0868	3.70323	0.164871	0.622383	0.457512	0.0480609	hyper
27	43915481	43916034	31947648	31947678	1323770	31	554	17.871	69.0255	2.44994	0.109861	0.743846	0.633985	0.0481269	hyper
4	104470459	104471081	6313850	6313882	1612961	33	623	18.8788	69.0168	2.30228	0.10036	0.729369	0.629008	0.0466751	hyper
4	111740773	111741606	6409023	6409048	1619240	26	834	32.0769	-68.9756	-1.8736	-0.116298	0.574801	0.691099	0.0470387	hypo
16	79700336	79701184	22237679	22237708	679551	30	849	28.3	68.9499	2.70047	0.127043	0.586736	0.459692	0.0542042	hyper
29	47258476	47258964	33253385	33253410	1402995	26	489	18.8077	-68.9348	-1.83031	-0.117759	0.467837	0.585596	0.0536329	hypo
9	80159406	80160221	13258025	13258040	2122469	16	816	51	68.9344	5.95324	0.222888	0.753834	0.530946	0.0477026	hyper
4	89763516	89764735	6105742	6105765	1600833	24	1220	50.8333	-68.9331	-1.86746	-0.179532	0.396435	0.575968	0.0596966	hypo
12	25177845	25178429	16806110	16806133	351445	24	585	24.375	-68.924	-1.84768	-0.148576	0.614061	0.762637	0.0521794	hypo
4	111402362	111403366	6403072	6403095	1619016	24	1005	41.875	68.908	3.43393	0.144511	0.637547	0.493036	0.0468963	hyper
12	87002616	87003239	17613870	17613899	404916	30	624	20.8	-68.8645	-1.9801	-0.102816	0.651132	0.753947	0.0463071	hypo
19	58536792	58538039	25138162	25138184	832217	23	1248	54.2609	-68.8513	-1.85017	-0.216926	0.421773	0.638699	0.0549575	hypo
13	25959772	25960185	17991664	17991690	426557	27	414	15.3333	-68.8397	-1.90582	-0.116245	0.273052	0.389298	0.0509106	hypo
2	126372422	126373079	3358079	3358099	956392	21	658	31.3333	68.8176	3.77077	0.17387	0.64854	0.47467	0.0516921	hyper
26	45622222	45622996	31148270	31148296	1286534	27	775	28.7037	68.809	3.10032	0.119403	0.541094	0.42169	0.0467693	hyper
22	14511967	14512827	27390073	27390099	1094204	27	861	31.8889	68.7727	3.16907	0.166562	0.757517	0.590954	0.0530794	hyper
15	14911736	14913220	20200229	20200257	553186	29	1485	51.2069	68.7698	2.6185	0.155137	0.809258	0.654121	0.053646	hyper
1	152339437	152340123	1762782	1762808	146987	27	687	25.4444	-68.7359	-1.88153	-0.149573	0.277959	0.427532	0.0504055	hypo
12	14926623	14927292	16644779	16644801	343643	23	670	29.1304	-68.6908	-2.2411	-0.164248	0.66843	0.832678	0.0571168	hypo
26	7885383	7886255	30603333	30603360	1256056	28	873	31.1786	68.6585	2.96545	0.145338	0.826801	0.681463	0.048882	hyper
24	44294551	44295273	29510288	29510311	1207752	24	723	30.125	-68.6316	-1.94222	-0.125573	0.490559	0.616132	0.050583	hypo
11	106777773	106778313	16457487	16457510	329931	24	541	22.5417	-68.5921	-2.24863	-0.123181	0.494064	0.617245	0.044876	hypo
8	62546922	62547921	11635098	11635122	2000565	25	1000	40	68.5768	3.87026	0.145851	0.774735	0.628884	0.0447144	hyper
15	21937633	21938488	20278188	20278212	560089	25	856	34.24	68.5684	3.61423	0.15675	0.904079	0.747329	0.0463702	hyper
4	10906050	10906729	5175314	5175339	1523933	26	680	26.1538	-68.5565	-1.83062	-0.124203	0.546301	0.670504	0.0454374	hypo
23	42505256	42505611	28676850	28676873	1164676	24	356	14.8333	-68.5377	-1.86028	-0.118349	0.551535	0.669884	0.046589	hypo
2	4843339	4843850	1926989	1927013	839179	25	512	20.48	-68.5221	-1.97789	-0.143563	0.499875	0.643439	0.0536799	hypo
13	71529624	71530788	18662944	18662966	461535	23	1165	50.6522	-68.5088	-2.01596	-0.161265	0.507287	0.668552	0.0487766	hypo
19	51851148	51852050	25019779	25019802	828529	24	903	37.625	68.4769	3.30383	0.140497	0.797027	0.65653	0.0462575	hyper
19	44941452	44942374	24914259	24914278	823616	20	923	46.15	-68.4626	-2.5011	-0.156372	0.253193	0.409565	0.0506541	hypo
X	138890558	138891049	34781651	34781672	2266622	22	492	22.3636	-68.4466	-2.25193	-0.11857	0.587813	0.706383	0.0419731	hypo
3	1005188	1005586	3544842	3544863	1405909	22	399	18.1364	68.4019	4.0657	0.14429	0.402953	0.258662	0.0445563	hyper
17	66193772	66194472	23145185	23145204	737132	20	701	35.05	-68.3983	-1.82812	-0.182867	0.366038	0.548905	0.0499416	hypo
11	44324766	44325376	15612249	15612271	278701	23	611	26.5652	-68.3792	-2.07662	-0.127633	0.521183	0.648815	0.0514505	hypo
8	9550896	9551380	11015131	11015160	1949292	30	485	16.1667	-68.2586	-1.85719	-0.124693	0.282122	0.406815	0.0547287	hypo
23	44767624	44768098	28720515	28720543	1166002	29	475	16.3793	-68.2353	-1.87253	-0.112465	0.523144	0.635608	0.053467	hypo
16	80792488	80792993	22254371	22254392	680137	22	506	23	68.1205	3.26586	0.138544	0.719452	0.580908	0.0455816	hyper
23	43796387	43797146	28702476	28702502	1165382	27	760	28.1481	-68.1188	-2.04976	-0.143135	0.435355	0.57849	0.0524206	hypo
6	70781580	70782103	8897720	8897745	1800796	26	524	20.1538	68.0904	3.17234	0.11076	0.689269	0.578509	0.0494092	hyper
19	59668979	59669708	25164494	25164518	832748	25	730	29.2	-68.0302	-1.97433	-0.125762	0.439911	0.565672	0.0480349	hypo
29	43846837	43847453	33194506	33194532	1401063	27	617	22.8519	-68.0158	-1.86904	-0.119906	0.722409	0.842315	0.0523953	hypo
27	5891171	5892043	31347183	31347210	1294522	28	873	31.1786	68.0155	2.77927	0.173754	0.765808	0.592054	0.0566774	hyper
19	57302337	57303003	25113824	25113851	831597	28	667	23.8214	68.0083	2.75742	0.118531	0.721979	0.603449	0.0464322	hyper
20	3898004	3898726	25310589	25310615	965035	27	723	26.7778	-67.9969	-1.93572	-0.129181	0.659251	0.788432	0.0499973	hypo
13	74848008	74848436	18715414	18715445	463791	32	429	13.4062	-67.9681	-1.84936	-0.108181	0.761076	0.869257	0.0447379	hypo
11	89033624	89034091	16184140	16184161	318283	22	468	21.2727	-67.9612	-2.2057	-0.161173	0.389987	0.55116	0.0532628	hypo
1	139013573	139014287	1553225	1553251	137601	27	715	26.4815	67.9523	2.72281	0.11604	0.78017	0.66413	0.0487039	hyper
24	38828137	38828685	29419070	29419097	1203963	28	549	19.6071	-67.9298	-1.89337	-0.1197	0.507266	0.626966	0.0483921	hypo
5	27709878	27711089	6904200	6904227	1650268	28	1212	43.2857	-67.9152	-1.93184	-0.10825	0.604724	0.712974	0.050353	hypo
18	8366212	8366961	23404741	23404762	746474	22	750	34.0909	67.9087	3.72092	0.182761	0.692769	0.510009	0.056814	hyper
1	77034067	77034660	850034	850052	76716	19	594	31.2632	67.8843	3.87785	0.218774	0.835297	0.616522	0.0439435	hyper
16	73885065	73885790	22125806	22125834	675970	29	726	25.0345	-67.8791	-1.89386	-0.147476	0.425801	0.573277	0.0659343	hypo
18	61564944	61565614	24183103	24183130	786991	28	671	23.9643	67.8661	3.0195	0.138891	0.624401	0.48551	0.051253	hyper
22	6680300	6680913	27263576	27263598	1088578	23	614	26.6957	67.7684	4.25032	0.188617	0.594142	0.405525	0.0562491	hyper
20	5906119	5906669	25345865	25345887	966277	23	551	23.9565	67.7201	4.29269	0.141891	0.588188	0.446297	0.0477174	hyper
15	77675997	77676498	21032014	21032043	607045	30	502	16.7333	-67.6892	-2.00496	-0.127201	0.477946	0.605147	0.0549524	hypo
17	50601146	50601961	22875481	22875506	727062	26	816	31.3846	67.6781	3.20716	0.149339	0.7272	0.577861	0.0463344	hyper
18	7548653	7549433	23389538	23389565	745974	28	781	27.8929	-67.6148	-1.90103	-0.147009	0.729745	0.876754	0.0524512	hypo
1	81471586	81472782	905871	905893	80786	23	1197	52.0435	-67.6023	-1.86591	-0.11635	0.647951	0.764301	0.0442768	hypo
29	47407271	47407827	33255867	33255893	1403077	27	557	20.6296	-67.5967	-1.84428	-0.145003	0.508827	0.65383	0.0551784	hypo
13	41199954	41200456	18222568	18222597	438324	30	503	16.7667	-67.5505	-1.87929	-0.113504	0.565803	0.679307	0.050373	hypo
11	73430170	73430939	15963470	15963498	305705	29	770	26.5517	67.5289	2.91796	0.11919	0.782646	0.663456	0.0481999	hyper
4	90457707	90458102	6112098	6112109	1601591	12	396	33	-67.5202	-5.28719	-0.249105	0.340108	0.589213	0.044778	hypo
10	9257630	9258470	13794394	13794412	158357	19	841	44.2632	67.4971	4.56481	0.201622	0.930225	0.728602	0.046139	hyper
X	135146716	135147560	34699267	34699294	2265001	28	845	30.1786	67.4672	3.05264	0.117584	0.701066	0.583482	0.0404991	hyper
23	31434493	31434963	28503882	28503911	1155956	30	471	15.7	-67.4657	-1.8702	-0.111783	0.0775157	0.189298	0.0567265	hypo
11	58650961	58651935	15773764	15773791	292273	28	975	34.8214	67.4068	2.8194	0.136341	0.765335	0.628994	0.0452936	hyper
8	110661679	110662658	12282393	12282418	2042301	26	980	37.6923	-67.4047	-1.8464	-0.151391	0.5422	0.693591	0.0544621	hypo
19	54632520	54633093	25067706	25067734	830175	29	574	19.7931	67.4043	2.70873	0.137741	0.464953	0.327212	0.0588524	hyper
6	59295176	59295519	8756415	8756438	1789927	24	344	14.3333	-67.4001	-2.07964	-0.206796	0.559869	0.766665	0.0591478	hypo
21	68965751	68966139	27153727	27153757	1082821	31	389	12.5484	-67.3706	-1.85951	-0.1296	0.574048	0.703649	0.0478178	hypo
X	32976655	32977902	33594117	33594144	2165565	28	1248	44.5714	67.3555	2.74371	0.120217	0.662347	0.54213	0.0433596	hyper
8	10282085	10282996	11027609	11027631	1949841	23	912	39.6522	67.3182	3.64105	0.150057	0.586826	0.436768	0.0512399	hyper
19	17531704	17532332	24491724	24491742	804085	19	629	33.1053	-67.3099	-2.94839	-0.165765	0.698121	0.863886	0.0478604	hypo
X	15765813	15766543	33481388	33481410	2155710	23	731	31.7826	67.2788	3.0738	0.148892	0.386053	0.237161	0.0544092	hyper
4	74944704	74945230	5934720	5934740	1586599	21	527	25.0952	-67.2741	-1.86481	-0.135132	0.424173	0.559306	0.0461228	hypo
12	81457331	81457935	17497164	17497178	401985	15	605	40.3333	67.2679	4.86942	0.27687	0.73623	0.45936	0.0570169	hyper
23	36625323	36626098	28576015	28576041	1160626	27	776	28.7407	-67.2425	-1.96351	-0.116234	0.397823	0.514058	0.0524608	hypo
11	21044873	21045795	15336873	15336895	256623	23	923	40.1304	-67.1989	-2.11235	-0.130629	0.500049	0.630677	0.0497934	hypo
16	57862254	57862715	21886865	21886895	663133	31	462	14.9032	67.1681	2.36592	0.114385	0.720668	0.606282	0.0508568	hyper
5	108802250	108802805	7906396	7906421	1724371	26	556	21.3846	67.1588	3.35597	0.118921	0.768958	0.650037	0.0485382	hyper
23	31249476	31249919	28500720	28500746	1155835	27	444	16.4444	67.1501	2.59964	0.153887	0.478483	0.324596	0.0563769	hyper
X	18677709	18678158	33519537	33519556	2158169	20	450	22.5	-67.1226	-2.91291	-0.152315	0.37473	0.527045	0.0460258	hypo
10	25872413	25873657	14005850	14005872	170792	23	1245	54.1304	67.1026	3.25894	0.169308	0.669244	0.499936	0.0497713	hyper
14	47757892	47758761	19579377	19579404	507471	28	870	31.0714	67.079	2.6067	0.131549	0.651545	0.519996	0.0507625	hyper
1	139175198	139177022	1555020	1555048	137757	29	1825	62.931	-67.0521	-2.10138	-0.10783	0.573847	0.681677	0.0448769	hypo
22	55129881	55130554	27969035	27969065	1127835	31	674	21.7419	67.0518	2.3284	0.11855	0.748916	0.630366	0.0491605	hyper
1	108808411	108808994	1204695	1204721	108186	27	584	21.6296	-67.0188	-2.16401	-0.139394	0.595797	0.735191	0.0542566	hypo
5	10284002	10284621	6692711	6692734	1633776	24	620	25.8333	-67.0141	-1.98719	-0.14708	0.310908	0.457988	0.0502355	hypo
1	157161062	157161363	1853503	1853530	150127	28	302	10.7857	-66.9714	-2.1213	-0.121704	0.282045	0.403748	0.0496847	hypo
19	54383857	54385094	25063193	25063217	830048	25	1238	49.52	66.9688	3.22382	0.206027	0.711466	0.505439	0.0552563	hyper
9	19946499	19947117	12554329	12554346	2063095	18	619	34.3889	-66.9662	-3.19973	-0.148056	0.646911	0.794966	0.044718	hypo
16	74694416	74695227	22138695	22138716	676577	22	812	36.9091	66.9595	3.8286	0.19875	0.771914	0.573164	0.0490732	hyper
1	152179761	152180210	1759906	1759937	146887	32	450	14.0625	-66.9488	-1.86261	-0.136281	0.58756	0.723841	0.0572223	hypo
13	35537099	35537997	18129591	18129613	434439	23	899	39.087	66.9096	3.57744	0.148932	0.769536	0.620604	0.0524405	hyper
27	40292085	40292510	31872666	31872695	1321726	30	426	14.2	-66.8638	-1.85736	-0.145507	0.575484	0.720991	0.0633657	hypo
13	71686001	71686955	18665467	18665486	461639	20	955	47.75	66.8563	3.91247	0.189069	0.644689	0.45562	0.0474899	hyper
7	29108013	29108762	9867500	9867523	1866075	24	750	31.25	66.8286	3.36612	0.129564	0.747803	0.618239	0.0481665	hyper
20	23143237	23143936	25580152	25580174	981607	23	700	30.4348	66.7651	3.46635	0.167968	0.941773	0.773804	0.0529659	hyper
9	103269013	103269650	13640664	13640681	2139571	18	638	35.4444	-66.764	-2.29232	-0.158754	0.576752	0.735506	0.0449088	hypo
14	66571464	66572492	19805540	19805558	525132	19	1029	54.1579	66.7452	4.38893	0.176404	0.729142	0.552738	0.0465935	hyper
5	112682008	112682327	7972147	7972163	1726784	17	320	18.8235	-66.7314	-3.2226	-0.206567	0.376203	0.58277	0.0527023	hypo
24	7055758	7056676	29011151	29011176	1175108	26	919	35.3462	-66.7189	-1.88196	-0.132768	0.562003	0.694771	0.0512478	hypo
X	136281153	136282266	34725282	34725305	2265450	24	1114	46.4167	66.7053	3.65426	0.12322	0.751447	0.628227	0.0453457	hyper
9	21502138	21502588	12571484	12571510	2064680	27	451	16.7037	-66.6681	-1.95486	-0.163162	0.40567	0.568833	0.0699254	hypo
24	786151	786752	28899137	28899156	1170779	20	602	30.1	66.6382	3.81702	0.202499	0.689991	0.487492	0.0585073	hyper
25	26990660	26991984	30263047	30263076	1238378	30	1325	44.1667	66.611	2.68828	0.125368	0.731781	0.606412	0.0463814	hyper
3	27872531	27873427	3889515	3889538	1429391	24	897	37.375	66.5725	3.11602	0.12771	0.633835	0.506125	0.0436257	hyper
27	26471341	26471778	31638254	31638279	1312109	26	438	16.8462	-66.5321	-1.82853	-0.135917	0.429323	0.56524	0.0558767	hypo
21	67517451	67517833	27128578	27128600	1082063	23	383	16.6522	66.5154	3.21795	0.176467	0.654663	0.478196	0.0558031	hyper
6	45567335	45568637	8617271	8617294	1775812	24	1303	54.2917	66.5144	3.4486	0.146179	0.561736	0.415557	0.0471469	hyper
19	42510116	42510276	24878957	24878978	821834	22	161	7.31818	-66.5114	-2.44144	-0.205002	0.554898	0.7599	0.0643365	hypo
29	49782466	49782864	33292451	33292473	1404315	23	399	17.3478	66.4667	3.11414	0.138278	0.633636	0.495358	0.0481831	hyper
28	18477855	18478560	32216805	32216823	1341248	19	706	37.1579	66.4608	4.01609	0.212479	0.790847	0.578368	0.0524727	hyper
16	3825984	3826529	21208333	21208355	615134	23	546	23.7391	-66.4491	-2.02531	-0.138642	0.541649	0.680291	0.0451159	hypo
9	91184667	91185255	13410037	13410059	2131946	23	589	25.6087	-66.3638	-1.92077	-0.110602	0.52711	0.637712	0.0582192	hypo
1	88089077	88089697	984029	984042	87165	14	621	44.3571	-66.3608	-3.94536	-0.215695	0.474625	0.69032	0.0499329	hypo
17	6023219	6023649	22334330	22334355	685667	26	431	16.5769	66.3448	2.76914	0.1584	0.728792	0.570392	0.0507773	hyper
8	112112071	112112710	12311605	12311629	2043077	25	640	25.6	66.3382	3.39528	0.131497	0.685254	0.553757	0.0482977	hyper
17	44707593	44708126	22785946	22785964	722653	19	534	28.1053	66.3103	4.01451	0.189026	0.534269	0.345243	0.0510762	hyper
8	25072534	25073186	11204224	11204248	1964016	25	653	26.12	-66.3037	-1.97664	-0.174533	0.564616	0.739149	0.0651401	hypo
8	53493871	53494442	11529213	11529235	1991965	23	572	24.8696	66.2257	3.15217	0.17176	0.704405	0.532645	0.0459101	hyper
20	10105028	10105384	25411836	25411851	969487	16	357	22.3125	66.2233	5.32244	0.187977	0.570805	0.382827	0.0492958	hyper
4	30620186	30621355	5414053	5414076	1543103	24	1170	48.75	-66.2197	-1.89812	-0.186963	0.424293	0.611255	0.0600462	hypo
25	37561798	37562790	30440492	30440526	1245297	35	993	28.3714	66.2114	2.1061	0.128074	0.529752	0.401679	0.052451	hyper
26	8311123	8311640	30609168	30609202	1256448	35	518	14.8	-66.1689	-1.831	-0.129921	0.229266	0.359186	0.070794	hypo
25	21102512	21102959	30168820	30168844	1234300	25	448	17.92	-66.1656	-2.09902	-0.133363	0.512994	0.646357	0.0508651	hypo
25	42028025	42028449	30523399	30523413	1247647	15	425	28.3333	-66.129	-2.10055	-0.217959	0.54112	0.759079	0.0545633	hypo
23	42846206	42846604	28683931	28683956	1164841	26	399	15.3462	-66.1233	-2.15872	-0.129401	0.465925	0.595326	0.0477206	hypo
17	19220748	19221543	22528378	22528399	696488	22	796	36.1818	-66.0804	-2.42758	-0.10747	0.635814	0.743285	0.0547708	hypo
18	16688269	16688918	23536437	23536463	752137	27	650	24.0741	-66.0702	-2.08369	-0.13108	0.458329	0.589409	0.0635599	hypo
27	40429013	40429429	31876427	31876456	1321776	30	417	13.9	66.0685	2.57612	0.121212	0.728399	0.607187	0.049373	hyper
21	36462741	36463443	26706841	26706866	1055156	26	703	27.0385	-66.0522	-1.85987	-0.169617	0.434885	0.604501	0.0600436	hypo
1	126183865	126184759	1399527	1399551	125560	25	895	35.8	-65.9958	-1.95718	-0.12767	0.675435	0.803105	0.0439323	hypo
18	18726077	18726811	23567185	23567206	753650	22	735	33.4091	-65.9736	-2.21261	-0.144459	0.604409	0.748867	0.050316	hypo
24	47487972	47488858	29558290	29558318	1210205	29	887	30.5862	-65.9597	-1.85352	-0.140551	0.556621	0.697172	0.0533872	hypo
12	85319056	85319605	17580893	17580916	404036	24	550	22.9167	-65.9541	-2.05003	-0.161912	0.465943	0.627855	0.0651994	hypo
13	16112839	16113537	17842671	17842691	418661	21	699	33.2857	65.908	3.87554	0.161872	0.685212	0.523341	0.045787	hyper
27	24437044	24437673	31604911	31604938	1310648	28	630	22.5	-65.9007	-1.82856	-0.137203	0.562414	0.699617	0.0604374	hypo
7	47490115	47490816	10080842	10080867	1882816	26	702	27	65.8807	3.05236	0.120249	0.761249	0.641	0.0509803	hyper
29	47105903	47106399	33250485	33250503	1402922	19	497	26.1579	65.8731	3.71271	0.174726	0.466805	0.292078	0.0534529	hyper
1	154065847	154066619	1796645	1796673	148020	29	773	26.6552	65.856	2.64758	0.153931	0.686176	0.532245	0.0624507	hyper
19	59523795	59524347	25161440	25161470	832667	31	553	17.8387	65.8442	2.31461	0.141715	0.742577	0.600862	0.0464208	hyper
29	7637211	7637836	32694696	32694723	1371364	28	626	22.3571	-65.8441	-1.92119	-0.1529	0.451655	0.604555	0.0724891	hypo
27	33541269	33541873	31750924	31750949	1317495	26	605	23.2692	65.8391	2.93752	0.115886	0.646988	0.531102	0.0458497	hyper
1	142828164	142828800	1607063	1607087	140641	25	637	25.48	-65.8314	-1.86467	-0.123502	0.64962	0.773122	0.0460686	hypo
5	33709171	33709758	6982723	6982733	1655401	11	588	53.4545	-65.7894	-4.69259	-0.303319	0.360737	0.664056	0.0492389	hypo
13	9396957	9397957	17739219	17739243	413429	25	1001	40.04	-65.7719	-1.83853	-0.104317	0.535961	0.640278	0.0515037	hypo
2	131409070	131409787	3443890	3443911	959514	22	718	32.6364	-65.7675	-2.28568	-0.142712	0.72689	0.869602	0.0471417	hypo
28	15874796	15875808	32183379	32183406	1338919	28	1013	36.1786	-65.7457	-1.92791	-0.111249	0.542217	0.653466	0.0475536	hypo
13	18762423	18762989	17889123	17889138	420441	16	567	35.4375	65.7337	5.09751	0.206441	0.894885	0.688444	0.0443513	hyper
19	39483839	39484408	24837117	24837138	819351	22	570	25.9091	65.7284	3.25437	0.200087	0.466499	0.266412	0.0589086	hyper
9	43791146	43791991	12846652	12846683	2085974	32	846	26.4375	65.6887	2.17219	0.135589	0.674133	0.538544	0.0489445	hyper
28	37306933	37307516	32461712	32461731	1357988	20	584	29.2	-65.6783	-2.36813	-0.15939	0.517011	0.676401	0.0558888	hypo
2	72774847	72775574	2709587	2709604	906435	18	728	40.4444	-65.6522	-2.27933	-0.168006	0.596448	0.764454	0.0449492	hypo
29	47939517	47940230	33265736	33265763	1403379	28	714	25.5	65.6259	2.89414	0.175132	0.703173	0.528041	0.0536478	hyper
17	63134290	63134995	23082921	23082944	735583	24	706	29.4167	65.6006	3.00394	0.163426	0.703504	0.540079	0.0567223	hyper
11	79110730	79111687	16039199	16039220	310600	22	958	43.5455	-65.5814	-2.03292	-0.102778	0.561812	0.664591	0.0497168	hypo
22	42147737	42148533	27771695	27771719	1118179	25	797	31.88	65.5738	3.1615	0.149483	0.604501	0.455017	0.0480944	hyper
9	60723655	60724125	13026071	13026090	2103478	20	471	23.55	65.5196	3.45774	0.177411	0.833175	0.655764	0.0493093	hyper
1	69095372	69096280	750842	750861	69380	20	909	45.45	65.5138	4.05486	0.203464	0.745644	0.54218	0.049118	hyper
18	59119611	59120030	24146370	24146389	785278	20	420	21	-65.4143	-2.45422	-0.147656	0.657994	0.80565	0.0468527	hypo
17	11150162	11151092	22407970	22407995	689911	26	931	35.8077	65.4116	2.83376	0.127388	0.601956	0.474568	0.060907	hyper
24	2673065	2673701	28937821	28937845	1171827	25	637	25.48	-65.4052	-1.92224	-0.102216	0.675864	0.778081	0.0465864	hypo
13	31414360	31415159	18068640	18068664	431123	25	800	32	-65.4025	-2.06185	-0.116201	0.350585	0.466786	0.055067	hypo
22	45515468	45515765	27819850	27819871	1121022	22	298	13.5455	-65.383	-2.48734	-0.131322	0.586158	0.71748	0.0479062	hypo
16	1453914	1454783	21168877	21168901	613553	25	870	34.8	-65.358	-1.8413	-0.121449	0.523738	0.645186	0.0471557	hypo
23	7741583	7742221	28174245	28174275	1137752	31	639	20.6129	65.3129	2.21939	0.114898	0.645097	0.530198	0.0542102	hyper
12	18784668	18785581	16705689	16705711	346577	23	914	39.7391	65.3067	3.17199	0.151586	0.818922	0.667336	0.0566476	hyper
15	25715454	25716094	20336803	20336828	562911	26	641	24.6538	-65.3061	-1.94214	-0.118669	0.581297	0.699966	0.0539699	hypo
24	59549920	59550665	29777251	29777280	1218076	30	746	24.8667	-65.2749	-1.9241	-0.110224	0.532838	0.643062	0.0690925	hypo
24	16626057	16626346	29115914	29115935	1184650	22	290	13.1818	-65.2743	-2.90946	-0.150365	0.502532	0.652897	0.0514989	hypo
12	31806502	31806984	16909563	16909588	356581	26	483	18.5769	65.2589	2.73117	0.150992	0.617896	0.466904	0.0538344	hyper
16	4308057	4308611	21216534	21216552	615460	19	555	29.2105	-65.2523	-2.2551	-0.155099	0.595345	0.750443	0.0456941	hypo
X	99652809	99653465	34253755	34253776	2232618	22	657	29.8636	-65.213	-2.79063	-0.107484	0.601882	0.709366	0.0409781	hypo
12	75514328	75514634	17393360	17393385	397840	26	307	11.8077	-65.2072	-1.91638	-0.136272	0.510009	0.646281	0.0537499	hypo
3	7861017	7861534	3629614	3629626	1412128	13	518	39.8462	65.1759	5.66482	0.249649	0.600294	0.350645	0.0467625	hyper
3	30649970	30650508	3926261	3926282	1431845	22	539	24.5	65.1461	3.25964	0.158351	0.611467	0.453116	0.0475753	hyper
16	52693324	52694011	21820764	21820785	658558	22	688	31.2727	65.1368	3.69328	0.159438	0.67771	0.518272	0.0497187	hyper
10	69144681	69145445	14523099	14523117	212171	19	765	40.2632	-65.1358	-2.19121	-0.156968	0.459309	0.616277	0.0570911	hypo
4	61099461	61100368	5760432	5760456	1573718	25	908	36.32	-65.104	-1.96046	-0.114849	0.517159	0.632009	0.0537746	hypo
9	61063137	61063768	13031252	13031283	2103752	32	632	19.75	-65.039	-1.837	-0.10737	0.270825	0.378195	0.0567878	hypo
25	12876984	12877679	30048092	30048116	1227745	25	696	27.84	-65.0062	-1.85144	-0.125259	0.45783	0.583089	0.0550429	hypo
10	80661267	80661774	14671777	14671799	222787	23	508	22.087	64.9868	3.15742	0.144883	0.810539	0.665656	0.0477514	hyper
8	111089989	111090224	12291830	12291853	2042521	24	236	9.83333	64.9813	3.25033	0.137712	0.44626	0.308548	0.0535142	hyper
17	19676095	19677043	22533611	22533642	696958	32	949	29.6562	64.9536	2.19721	0.146311	0.763557	0.617246	0.0464879	hyper
19	28336286	28337051	24661752	24661776	811611	25	766	30.64	64.9486	2.943	0.138353	0.624533	0.48618	0.0480439	hyper
16	4245755	4246390	21215547	21215571	615424	25	636	25.44	-64.9343	-1.90928	-0.127132	0.574985	0.702116	0.0567702	hypo
11	48541673	48542792	15672088	15672112	282072	25	1120	44.8	-64.9209	-2.09338	-0.161206	0.507079	0.668285	0.0596316	hypo
26	44241194	44241799	31121090	31121113	1285748	24	606	25.25	-64.8554	-1.92705	-0.168537	0.500196	0.668732	0.0604282	hypo
2	115408376	115409164	3199598	3199623	947859	26	789	30.3462	-64.8273	-2.03029	-0.108954	0.565582	0.674536	0.0470696	hypo
29	31685603	31686319	33012557	33012583	1392302	27	717	26.5556	64.8058	2.67634	0.196349	0.58426	0.38791	0.0589906	hyper
6	56940891	56941221	8723544	8723565	1787872	22	331	15.0455	-64.7912	-1.92215	-0.140683	0.162565	0.303247	0.048081	hypo
X	136163816	136164299	34722583	34722608	2265403	26	484	18.6154	64.7706	2.67041	0.114305	0.63111	0.516806	0.0449884	hyper
3	110903445	110904520	4866668	4866697	1508546	30	1076	35.8667	64.756	2.2924	0.13631	0.769832	0.633522	0.0480059	hyper
13	51374380	51375263	18357630	18357654	447040	25	884	35.36	-64.7026	-1.84839	-0.107026	0.805068	0.912094	0.0446765	hypo
27	42513846	42514176	31920738	31920763	1322912	26	331	12.7308	-64.6894	-1.86013	-0.10727	0.592933	0.700203	0.0490264	hypo
14	81707905	81708651	20034283	20034302	537695	20	747	37.35	64.6784	3.88926	0.19563	0.817608	0.621979	0.056584	hyper
15	70716411	70717287	20922429	20922452	601964	24	877	36.5417	-64.6619	-1.91452	-0.130884	0.557033	0.687916	0.0496242	hypo
24	11366217	11367023	29065976	29065995	1179118	20	807	40.35	64.6377	3.56401	0.177556	0.663516	0.485961	0.0483391	hyper
X	67905800	67906265	33941740	33941763	2200473	24	466	19.4167	64.6226	3.01924	0.139854	0.473271	0.333417	0.0463766	hyper
19	5899559	5900347	24304663	24304687	795649	25	789	31.56	-64.6138	-1.9117	-0.117041	0.651529	0.76857	0.0460446	hypo
22	56683754	56684131	28000562	28000582	1128671	21	378	18	-64.6072	-1.84592	-0.148485	0.558797	0.707282	0.0487559	hypo
14	15430892	15431510	19138196	19138226	478996	31	619	19.9677	64.5843	2.23585	0.107982	0.593984	0.486002	0.0462938	hyper
13	74667497	74668246	18712704	18712727	463679	24	750	31.25	-64.5501	-2.37124	-0.123916	0.588417	0.712333	0.0452222	hypo
4	116432747	116433370	6491292	6491318	1622085	27	624	23.1111	-64.53	-1.84774	-0.105825	0.526353	0.632178	0.0503993	hypo
29	36319623	36320190	33093006	33093029	1395196	24	568	23.6667	64.4533	3.02002	0.14946	0.860577	0.711118	0.0489981	hyper
2	85353993	85354975	2831671	2831696	919534	26	983	37.8077	-64.4528	-1.83344	-0.100258	0.540645	0.640903	0.044334	hypo
9	20112074	20112270	12556782	12556797	2063226	16	197	12.3125	-64.436	-3.7544	-0.20108	0.504484	0.705563	0.0446087	hypo
12	19187073	19187527	16712514	16712535	346877	22	455	20.6818	64.4348	3.52371	0.145521	0.555667	0.410146	0.0479275	hyper
9	60560945	60561647	13023219	13023237	2103370	19	703	37	64.4205	4.36515	0.15268	0.724021	0.571341	0.0444064	hyper
20	37824336	37825038	25755459	25755479	995949	21	703	33.4762	64.4172	4.53028	0.15781	0.674505	0.516695	0.0538376	hyper
23	3297758	3298459	28108064	28108085	1134165	22	702	31.9091	64.4097	3.40177	0.129688	0.650337	0.520649	0.0468063	hyper
17	9548892	9549544	22383444	22383460	688724	17	653	38.4118	-64.3927	-2.23582	-0.180926	0.519541	0.700467	0.0527204	hypo
4	13358789	13359236	5210238	5210264	1526107	27	448	16.5926	64.3542	2.63859	0.113534	0.733513	0.619979	0.0450345	hyper
22	28174695	28175296	27567843	27567869	1106555	27	602	22.2963	64.3406	2.66866	0.127417	0.640025	0.512608	0.0473398	hyper
3	43033635	43033883	4062368	4062391	1444132	24	249	10.375	-64.3346	-1.9812	-0.107304	0.578684	0.685988	0.0545893	hypo
2	63094649	63095933	2603091	2603113	896798	23	1285	55.8696	64.3152	3.33988	0.183055	0.81644	0.633384	0.0559276	hyper
13	14233423	14234336	17816245	17816264	417007	20	914	45.7	-64.3139	-1.85668	-0.207737	0.461578	0.669315	0.0505342	hypo
21	20884074	20884821	26485860	26485882	1043011	23	748	32.5217	-64.2855	-2.06479	-0.12045	0.358982	0.479432	0.0496453	hypo
6	29895786	29896588	8444171	8444197	1760151	27	803	29.7407	-64.273	-1.84482	-0.119163	0.539906	0.659069	0.0484017	hypo
15	76542318	76542829	21010236	21010259	606351	24	512	21.3333	64.2716	3.05225	0.155894	0.659488	0.503594	0.0463054	hyper
4	82381482	82382407	6026190	6026220	1593366	31	926	29.871	64.2567	2.31065	0.103977	0.738337	0.63436	0.0475088	hyper
25	35349614	35350423	30404445	30404466	1243857	22	810	36.8182	64.2337	3.64522	0.140409	0.678863	0.538453	0.0505694	hyper
21	21640686	21641451	26497852	26497876	1043521	25	766	30.64	-64.2311	-1.84406	-0.116566	0.622881	0.739447	0.0473636	hypo
14	74263347	74264581	19915503	19915530	531709	28	1235	44.1071	-64.2035	-1.85651	-0.107571	0.528716	0.636287	0.0473423	hypo
19	54718582	54719140	25069307	25069330	830226	24	559	23.2917	-64.2026	-1.89114	-0.122313	0.728109	0.850421	0.0477817	hypo
27	37281391	37281905	31811782	31811805	1320020	24	515	21.4583	-64.1962	-1.88397	-0.128274	0.58246	0.710734	0.045371	hypo
4	95837274	95838072	6186201	6186223	1606031	23	799	34.7391	-64.1909	-2.01143	-0.122447	0.500488	0.622935	0.0521404	hypo
2	95466788	95467497	2958518	2958543	929105	26	710	27.3077	-64.1734	-1.88451	-0.121258	0.411924	0.533182	0.0561517	hypo
24	48065477	48065951	29568152	29568173	1210554	22	475	21.5909	-64.143	-2.07991	-0.110616	0.162939	0.273555	0.0478413	hypo
7	19928223	19929017	9752433	9752449	1857771	17	795	46.7647	64.1173	4.48987	0.18197	0.767358	0.585388	0.0515932	hyper
1	67513399	67514473	730282	730303	68010	22	1075	48.8636	-64.1061	-2.40849	-0.124639	0.688605	0.813244	0.0512845	hypo
7	30282516	30283296	9882148	9882164	1867169	17	781	45.9412	64.0632	4.24458	0.24824	0.778938	0.530699	0.0557584	hyper
2	50730906	50732187	2474104	2474128	883913	25	1282	51.28	64.0616	2.81005	0.135255	0.731089	0.595834	0.0445534	hyper
12	14916293	14917303	16644650	16644675	343633	26	1011	38.8846	-64.0142	-2.02933	-0.204109	0.579776	0.783885	0.0495188	hypo
24	61480515	61481056	29820642	29820666	1219140	25	542	21.68	-64.0069	-1.90411	-0.11778	0.575618	0.693398	0.0458126	hypo
17	10243586	10243939	22395152	22395171	689218	20	354	17.7	63.9932	3.517	0.164653	0.851697	0.687044	0.0478866	hyper
12	49007117	49008122	17109084	17109109	372939	26	1006	38.6923	-63.991	-1.98061	-0.109028	0.659789	0.768817	0.0458547	hypo
12	48945669	48946195	17108165	17108187	372888	23	527	22.913	-63.9527	-2.56709	-0.175741	0.537814	0.713555	0.0550799	hypo
16	4316384	4316800	21216697	21216711	615466	15	417	27.8	-63.9438	-3.42997	-0.219392	0.583112	0.802504	0.0476464	hypo
6	60224982	60225326	8770607	8770633	1790643	27	345	12.7778	-63.9131	-1.98318	-0.113905	0.241624	0.35553	0.0588811	hypo
25	9641190	9641676	29993793	29993818	1225595	26	487	18.7308	-63.9013	-1.90096	-0.118172	0.790216	0.908387	0.0515827	hypo
2	5511165	5511958	1936404	1936425	839714	22	794	36.0909	63.8924	3.47539	0.142823	0.317318	0.174495	0.059764	hyper
28	24361472	24361799	32277808	32277826	1347426	19	328	17.2632	63.8553	3.66156	0.147531	0.402727	0.255196	0.0474492	hyper
10	6509200	6509615	13751234	13751254	156168	21	416	19.8095	-63.8325	-2.11653	-0.131707	0.523226	0.654933	0.0482362	hypo
3	22564464	22564815	3817170	3817199	1424853	30	352	11.7333	63.8285	2.26368	0.140356	0.80179	0.661435	0.0639174	hyper
7	50683785	50684499	10121267	10121298	1885751	32	715	22.3438	63.8217	2.09696	0.130085	0.771989	0.641904	0.0593322	hyper
16	41246575	41247261	21655227	21655252	650599	26	687	26.4231	-63.7733	-1.87097	-0.129438	0.408535	0.537973	0.0598013	hypo
14	36365765	36366703	19436726	19436743	496736	18	939	52.1667	63.7678	4.5932	0.168313	0.631996	0.463683	0.0454714	hyper
29	50772430	50772813	33303974	33303991	1404777	18	384	21.3333	-63.7641	-2.61478	-0.18135	0.307368	0.488718	0.0533162	hypo
15	84763321	84763767	21138309	21138330	612555	22	447	20.3182	63.7628	4.04732	0.182152	0.527682	0.34553	0.0628318	hyper
28	2207430	2207752	32000469	32000486	1327085	18	323	17.9444	-63.7603	-2.95449	-0.180754	0.219539	0.400292	0.0509637	hypo
22	7549556	7549939	27280676	27280700	1089042	25	384	15.36	63.7447	2.71267	0.170207	0.867343	0.697136	0.0551753	hyper
10	16733139	16733875	13905262	13905280	164147	19	737	38.7895	63.7295	4.11745	0.220332	0.661716	0.441385	0.0623344	hyper
11	105390431	105390882	16439947	16439969	329199	23	452	19.6522	-63.7233	-1.91419	-0.122767	0.654539	0.777306	0.0525478	hypo
1	89574957	89575839	1001000	1001022	88528	23	883	38.3913	-63.6841	-1.95423	-0.173976	0.582769	0.756746	0.0545141	hypo
28	40571546	40572338	32501505	32501527	1361033	23	793	34.4783	63.6703	3.12836	0.119501	0.651908	0.532407	0.048066	hyper
5	116095171	116095808	8034404	8034431	1728754	28	638	22.7857	63.6515	2.55404	0.119536	0.711499	0.591962	0.0465367	hyper
3	41789863	41790196	4047095	4047118	1442952	24	334	13.9167	-63.6506	-2.36592	-0.11562	0.584654	0.700273	0.0473652	hypo
4	47939746	47940187	5612388	5612409	1560478	22	442	20.0909	-63.6502	-2.66621	-0.108226	0.456378	0.564604	0.05237	hypo
12	79133684	79134274	17461277	17461296	400079	20	591	29.55	-63.6398	-2.5148	-0.15762	0.417214	0.574834	0.046735	hypo
6	16616179	16616915	8285270	8285297	1747309	28	737	26.3214	-63.6358	-2.04591	-0.10828	0.719841	0.828121	0.0463562	hypo
X	133572247	133572903	34664056	34664071	2264374	16	657	41.0625	63.6254	4.5049	0.193311	0.565878	0.372567	0.041951	hyper
18	59919653	59919785	24159800	24159818	785822	19	133	7	-63.5953	-3.01389	-0.220448	0.472928	0.693376	0.0585508	hypo
24	57922082	57922557	29742686	29742713	1217178	28	476	17	63.5897	2.47716	0.125474	0.596602	0.471128	0.0565209	hyper
21	12406017	12407272	26355339	26355365	1036826	27	1256	46.5185	63.5889	2.6313	0.148277	0.716398	0.568121	0.0451999	hyper
X	37974293	37975033	33651687	33651713	2169838	27	741	27.4444	63.5747	2.90275	0.107798	0.595399	0.487601	0.0417449	hyper
19	54341152	54341729	25062306	25062329	830026	24	578	24.0833	-63.5701	-1.98457	-0.135522	0.554755	0.690278	0.0598314	hypo
12	22080257	22080989	16760062	16760083	348892	22	733	33.3182	63.5595	3.66992	0.139156	0.619888	0.480732	0.0531965	hyper
20	64165379	64166068	26059903	26059922	1021098	20	690	34.5	-63.5594	-1.84352	-0.108981	0.530442	0.639423	0.0491607	hypo
12	47999076	47999718	17095915	17095941	371986	27	643	23.8148	-63.5475	-2.09277	-0.126444	0.643477	0.769921	0.0632947	hypo
25	26909007	26910170	30261715	30261747	1238326	33	1164	35.2727	63.5244	2.09925	0.124073	0.578206	0.454133	0.0549427	hyper
11	63007052	63007546	15821808	15821835	296718	28	495	17.6786	-63.5159	-1.87548	-0.154982	0.324125	0.479107	0.0612796	hypo
1	54471575	54473007	583367	583385	54953	19	1433	75.4211	63.4969	4.54268	0.173629	0.735011	0.561381	0.0554243	hyper
1	64345533	64346204	693339	693365	64855	27	672	24.8889	63.4889	3.22952	0.127679	0.752456	0.624776	0.0454878	hyper
17	63716979	63717593	23094046	23094073	735905	28	615	21.9643	63.4757	2.53152	0.124686	0.65834	0.533654	0.0481172	hyper
10	7035734	7036620	13758472	13758494	156654	23	887	38.5652	63.4632	3.00521	0.189173	0.802225	0.613052	0.0575398	hyper
12	52742750	52743126	17154017	17154035	376531	19	377	19.8421	-63.4124	-2.25261	-0.157855	0.503726	0.661581	0.0503149	hypo
11	98141989	98142205	16322254	16322275	325151	22	217	9.86364	63.3819	3.14566	0.130287	0.529078	0.39879	0.0459941	hyper
3	77819127	77819755	4430915	4430939	1479838	25	629	25.16	-63.3681	-1.95852	-0.113396	0.434746	0.548142	0.0652641	hypo
22	57478248	57478595	28015537	28015562	1129187	26	348	13.3846	-63.3641	-1.89889	-0.112445	0.471121	0.583566	0.0499371	hypo
5	119696132	119696515	8095014	8095032	1730759	19	384	20.2105	63.3512	3.73187	0.185274	0.624884	0.43961	0.055055	hyper
24	57254157	57254760	29727208	29727237	1216883	30	604	20.1333	-63.3125	-1.87191	-0.123964	0.495707	0.619671	0.0622401	hypo
12	56640634	56641107	17201295	17201318	380303	24	474	19.75	-63.2954	-2.10219	-0.123091	0.409845	0.532935	0.0463797	hypo
29	49834473	49834816	33293503	33293518	1404342	16	344	21.5	63.2952	4.90887	0.192459	0.51194	0.31948	0.0523333	hyper
23	14940690	14941100	28287822	28287845	1142880	24	411	17.125	-63.2724	-2.14716	-0.150111	0.477043	0.627154	0.0567581	hypo
22	12664740	12665385	27358357	27358382	1092943	26	646	24.8462	63.2599	2.82152	0.110075	0.804088	0.694013	0.050872	hyper
20	36751595	36752152	25741326	25741341	994961	16	558	34.875	-63.2498	-1.90901	-0.181502	0.629628	0.811131	0.0476987	hypo
2	107095395	107096150	3095600	3095620	940246	21	756	36	-63.2155	-1.83195	-0.13797	0.617715	0.755685	0.0491499	hypo
23	33216644	33217763	28531256	28531278	1157502	23	1120	48.6957	-63.206	-1.91951	-0.124171	0.54892	0.673091	0.0517441	hypo
19	5159371	5160392	24294405	24294422	795014	18	1022	56.7778	63.1879	4.0093	0.372618	0.860222	0.487604	0.0460403	hyper
10	16365109	16365698	13899274	13899294	163916	21	590	28.0952	-63.1722	-2.24345	-0.141644	0.650017	0.791661	0.052097	hypo
8	104030791	104031691	12171140	12171170	2037575	31	901	29.0645	-63.1611	-1.97189	-0.108808	0.68956	0.798368	0.0572427	hypo
22	10135820	10136611	27316495	27316523	1091216	29	792	27.3103	63.1514	2.34295	0.116808	0.773555	0.656747	0.0453373	hyper
10	35421424	35421823	14117447	14117468	180248	22	400	18.1818	-63.113	-1.97066	-0.13337	0.606082	0.739452	0.0494453	hypo
27	15861472	15862422	31487804	31487830	1302927	27	951	35.2222	-63.0821	-1.92659	-0.116441	0.414366	0.530806	0.0539327	hypo
9	53090097	53091385	12946755	12946780	2095593	26	1289	49.5769	63.0607	2.6104	0.152819	0.677755	0.524936	0.0469554	hyper
5	98073202	98073913	7750605	7750632	1716301	28	712	25.4286	63.0394	2.71178	0.15464	0.90294	0.7483	0.0513106	hyper
1	147173359	147173968	1672591	1672616	143622	26	610	23.4615	62.9855	2.96765	0.155138	0.679991	0.524853	0.0478638	hyper
16	62347436	62348144	21947526	21947553	667068	28	709	25.3214	-62.978	-1.87692	-0.128033	0.450635	0.578668	0.0525839	hypo
1	61090675	61092144	657564	657581	61578	18	1470	81.6667	-62.9702	-2.61403	-0.18486	0.472443	0.657303	0.04395	hypo
9	9276698	9277788	12420450	12420476	2053284	27	1091	40.4074	62.9557	2.68723	0.138333	0.708413	0.57008	0.0455778	hyper
1	95688302	95688810	1064762	1064781	94881	20	509	25.45	-62.9286	-2.45072	-0.140867	0.45215	0.593017	0.0509673	hypo
19	60167352	60168106	25175733	25175755	832996	23	755	32.8261	62.9214	3.30265	0.126241	0.762889	0.636648	0.0506614	hyper
7	34549936	34550522	9929460	9929483	1871455	24	587	24.4583	62.8964	2.87723	0.100015	0.647431	0.547416	0.0475994	hyper
13	40730991	40731930	18214709	18214736	438013	28	940	33.5714	-62.8868	-1.84207	-0.105143	0.561892	0.667035	0.0442474	hypo
13	13678171	13678856	17810184	17810208	416467	25	686	27.44	-62.8815	-1.94697	-0.106177	0.651537	0.757714	0.045534	hypo
24	60240953	60241375	29792144	29792168	1218489	25	423	16.92	-62.8723	-2.09614	-0.115588	0.610191	0.725779	0.0455033	hypo
9	77339751	77340110	13228910	13228923	2119567	14	360	25.7143	-62.8706	-3.18873	-0.219711	0.659921	0.879632	0.0451186	hypo
1	146814039	146815172	1666062	1666093	143430	32	1134	35.4375	62.8652	2.07696	0.132102	0.817473	0.68537	0.0488757	hyper
17	64495337	64496324	23110340	23110368	736327	29	988	34.069	-62.8575	-1.83523	-0.121042	0.564412	0.685454	0.061365	hypo
X	133597841	133598265	34664679	34664695	2264381	17	425	25	62.8531	4.50886	0.163444	0.619212	0.455768	0.041065	hyper
26	36981102	36982015	30996712	30996730	1281010	19	914	48.1053	62.8397	4.12091	0.207428	0.736613	0.529185	0.0505708	hyper
23	28840853	28841574	28471707	28471731	1153675	25	722	28.88	62.8147	3.16172	0.133305	0.480089	0.346784	0.0601579	hyper
12	76283407	76284228	17409268	17409295	398249	28	822	29.3571	62.8	2.46169	0.116257	0.747356	0.631099	0.0466167	hyper
10	18055595	18056560	13924781	13924801	165121	21	966	46	62.737	3.50578	0.171838	0.730339	0.558501	0.0492034	hyper
28	45582421	45582701	32587908	32587933	1364407	26	281	10.8077	62.7333	2.57579	0.119715	0.835761	0.716046	0.0483939	hyper
24	35429206	35429931	29369274	29369299	1201134	26	726	27.9231	62.7276	2.71595	0.10044	0.695131	0.594692	0.0464717	hyper
6	98323384	98323734	9199695	9199714	1828240	20	351	17.55	-62.6991	-2.39946	-0.128187	0.401239	0.529427	0.0455128	hypo
22	6479612	6479940	27259831	27259856	1088469	26	329	12.6538	-62.6801	-1.84366	-0.107004	0.477975	0.584979	0.0583155	hypo
19	48518629	48519151	24967172	24967196	826420	25	523	20.92	62.6796	2.91372	0.138536	0.637277	0.498741	0.0485099	hyper
17	12448566	12449148	22427282	22427300	690955	19	583	30.6842	-62.6748	-2.01558	-0.179357	0.596509	0.775866	0.0511561	hypo
X	124774926	124775357	34544436	34544463	2257047	28	432	15.4286	62.6708	2.48288	0.126531	0.828201	0.70167	0.0415495	hyper
17	50524755	50525410	22874143	22874165	727017	23	656	28.5217	-62.6577	-2.19694	-0.168334	0.60793	0.776264	0.0479921	hypo
28	8750941	8751600	32095838	32095862	1332280	25	660	26.4	-62.6222	-1.8567	-0.117835	0.560507	0.678342	0.0458851	hypo
8	74618026	74619124	11791478	11791500	2011166	23	1099	47.7826	-62.5976	-1.8913	-0.156371	0.570039	0.72641	0.0577994	hypo
10	100259426	100259749	14962866	14962890	238323	25	324	12.96	62.5837	2.79734	0.111021	0.735255	0.624234	0.045047	hyper
21	57508715	57509456	26954217	26954237	1075774	21	742	35.3333	-62.5814	-2.11336	-0.110509	0.388665	0.499174	0.0465733	hypo
8	111669590	111669936	12302605	12302629	2042861	25	347	13.88	62.5772	2.7701	0.117827	0.584509	0.466682	0.0489754	hyper
10	17416746	17417158	13916019	13916044	164590	26	413	15.8846	-62.5302	-2.01032	-0.119074	0.379525	0.498599	0.0510339	hypo
19	27977793	27978238	24655430	24655455	811416	26	446	17.1538	62.4956	2.77934	0.161113	0.471682	0.310568	0.0480483	hyper
19	55890718	55891611	25090685	25090708	830850	24	894	37.25	-62.4781	-1.97365	-0.157914	0.497656	0.65557	0.0646513	hypo
20	36640278	36640992	25739603	25739629	994874	27	715	26.4815	62.4741	2.6669	0.113526	0.517734	0.404208	0.0570154	hyper
19	13937155	13937605	24431187	24431216	801799	30	451	15.0333	62.4422	2.18006	0.108395	0.48967	0.381275	0.0560761	hyper
9	96386552	96387318	13502540	13502562	2135402	23	767	33.3478	62.4038	3.21353	0.141854	0.690659	0.548805	0.0503761	hyper
10	34699589	34700077	14109254	14109278	179515	25	489	19.56	-62.3842	-2.22461	-0.122597	0.580966	0.703563	0.0512141	hypo
15	30786166	30787206	20413916	20413940	566594	25	1041	41.64	-62.3659	-1.91582	-0.103211	0.493318	0.596529	0.0493633	hypo
14	81958973	81959561	20040129	20040150	537832	22	589	26.7727	-62.3641	-1.88996	-0.147142	0.414072	0.561214	0.0508911	hypo
15	15876791	15877674	20213997	20214018	553959	22	884	40.1818	-62.3636	-2.13005	-0.129712	0.54003	0.669742	0.0479884	hypo
17	44877672	44878227	22788329	22788348	722775	20	556	27.8	-62.3594	-2.05646	-0.123546	0.453492	0.577038	0.0468585	hypo
5	103942173	103942983	7818570	7818590	1721638	21	811	38.619	62.3448	4.0923	0.156388	0.587567	0.431179	0.0515397	hyper
16	20243859	20244093	21378740	21378758	631704	19	235	12.3684	-62.3287	-2.37696	-0.151304	0.45075	0.602054	0.0564979	hypo
14	7446278	7447699	19013783	19013813	473058	31	1422	45.871	-62.308	-1.88326	-0.125994	0.596609	0.722603	0.0575624	hypo
1	108822427	108823145	1204937	1204957	108196	21	719	34.2381	62.2407	3.33329	0.126667	0.423085	0.296418	0.0476929	hyper
26	34828225	34829282	30965276	30965302	1279228	27	1058	39.1852	62.2233	2.59913	0.118048	0.818037	0.69999	0.0478649	hyper
8	110908501	110908886	12287932	12287961	2042437	30	386	12.8667	62.212	2.19576	0.110856	0.799113	0.688257	0.0455592	hyper
1	69185138	69185852	752193	752208	69462	16	715	44.6875	62.1718	4.36053	0.229481	0.806672	0.577192	0.0514341	hyper
17	42076753	42077782	22755148	22755163	720144	16	1030	64.375	-62.1482	-3.06427	-0.145347	0.515087	0.660433	0.0459991	hypo
24	48517625	48517923	29576210	29576232	1210821	23	299	13	-62.1176	-1.9398	-0.154104	0.592267	0.746371	0.0620438	hypo
15	22042774	22043314	20279780	20279803	560185	24	541	22.5417	62.1128	2.94842	0.134613	0.671058	0.536445	0.0615688	hyper
11	82376143	82376985	16083136	16083155	313412	20	843	42.15	62.1034	3.45598	0.160113	0.605536	0.445422	0.0487043	hyper
19	58068456	58069148	25127189	25127210	832016	22	693	31.5	-62.0968	-1.89562	-0.144909	0.511048	0.655957	0.050996	hypo
4	47103378	47104130	5602796	5602818	1559670	23	753	32.7391	-62.0883	-1.82709	-0.110211	0.505311	0.615522	0.0491685	hypo
23	31433610	31434023	28503855	28503881	1155955	27	414	15.3333	-62.0847	-1.99698	-0.118376	0.201539	0.319914	0.0574024	hypo
26	39774467	39774803	31043087	31043109	1282960	23	337	14.6522	-62.0838	-1.87829	-0.125333	0.372928	0.498261	0.0559887	hypo
29	8955828	8956596	32714828	32714848	1372375	21	769	36.619	62.0753	3.31271	0.149371	0.703669	0.554298	0.0504474	hyper
10	16624695	16625394	13903561	13903587	164069	27	700	25.9259	62.0738	2.59014	0.108225	0.419305	0.31108	0.0559098	hyper
18	7007937	7008431	23379409	23379432	745626	24	495	20.625	62.0669	2.69244	0.146489	0.679234	0.532744	0.0472793	hyper
5	95594768	95595583	7712374	7712389	1714416	16	816	51	-61.9709	-2.67392	-0.203425	0.561721	0.765147	0.0464692	hypo
1	116620484	116620937	1291161	1291183	116091	23	454	19.7391	-61.9515	-2.16751	-0.117724	0.497286	0.61501	0.0489039	hypo
20	24042179	24042857	25591322	25591342	982492	21	679	32.3333	61.9326	4.63846	0.116515	0.677874	0.56136	0.048131	hyper
3	92814873	92815839	4623160	4623190	1493391	31	967	31.1935	61.925	2.11687	0.100223	0.324469	0.224246	0.0438075	hyper
13	58501809	58502605	18461585	18461606	452209	22	797	36.2273	-61.89	-1.92632	-0.145931	0.588235	0.734166	0.0505279	hypo
22	6620458	6620846	27262277	27262300	1088542	24	389	16.2083	61.8852	2.71441	0.153751	0.640979	0.487228	0.056077	hyper
9	60034302	60035134	13014688	13014712	2102952	25	833	33.32	-61.8551	-1.83644	-0.146694	0.365923	0.512618	0.0544502	hypo
10	940119	941429	13674183	13674212	151533	30	1311	43.7	61.8521	2.66396	0.14463	0.596765	0.452135	0.0603307	hyper
12	14579377	14580167	16639323	16639342	343362	20	791	39.55	-61.8266	-1.88167	-0.181001	0.656428	0.837429	0.0557255	hypo
13	76133035	76133785	18740180	18740201	464502	22	751	34.1364	61.8221	3.55596	0.200948	0.920045	0.719097	0.0540258	hyper
19	60643484	60643797	25185547	25185575	833259	29	314	10.8276	-61.8171	-1.8691	-0.118769	0.575454	0.694223	0.0574007	hypo
28	6355563	6356526	32057620	32057646	1330531	27	964	35.7037	61.8073	2.55638	0.139741	0.675073	0.535332	0.0515691	hyper
13	65638036	65638725	18569108	18569130	457440	23	690	30	-61.8069	-1.83696	-0.126325	0.668845	0.795171	0.054689	hypo
10	32223513	32224786	14079290	14079314	177090	25	1274	50.96	-61.8016	-1.82929	-0.116901	0.677504	0.794404	0.051396	hypo
10	74148550	74149117	14586162	14586189	216902	28	568	20.2857	61.7823	2.52669	0.1269	0.634531	0.507631	0.0472585	hyper
1	94565566	94565900	1050841	1050865	93819	25	335	13.4	61.7458	2.60269	0.135944	0.733396	0.597452	0.0511452	hyper
22	52332810	52333259	27919865	27919891	1126120	27	450	16.6667	61.7279	2.47444	0.11838	0.650492	0.532111	0.0484442	hyper
7	12343668	12344393	9646938	9646961	1852292	24	726	30.25	-61.7274	-2.22699	-0.118939	0.28303	0.401969	0.0486193	hypo
3	101817369	101817882	4734122	4734143	1501637	22	514	23.3636	-61.7253	-1.84472	-0.108005	0.26539	0.373396	0.0463118	hypo
11	102450497	102451089	16397273	16397293	327668	21	593	28.2381	61.6995	3.57506	0.183209	0.777978	0.594769	0.0472249	hyper
1	115479567	115480134	1279904	1279924	114870	21	568	27.0476	61.6889	3.14124	0.218815	0.688827	0.470012	0.0527367	hyper
3	106597242	106598095	4800545	4800564	1505452	20	854	42.7	61.6682	3.87928	0.189754	0.692303	0.502549	0.0535604	hyper
4	7362025	7362431	5120860	5120877	1521222	18	407	22.6111	61.6471	4.00756	0.176791	0.554592	0.377801	0.051039	hyper
6	116451948	116452710	9466242	9466267	1841882	26	763	29.3462	-61.6373	-1.98419	-0.189666	0.694332	0.883998	0.0588943	hypo
20	17723094	17723875	25510114	25510135	976547	22	782	35.5455	61.6371	2.99773	0.172264	0.749813	0.57755	0.0464152	hyper
2	108711261	108712333	3115255	3115269	941673	15	1073	71.5333	-61.6076	-3.21826	-0.229279	0.228218	0.457497	0.0462051	hypo
19	62207151	62207496	25222538	25222559	833960	22	346	15.7273	-61.587	-1.82803	-0.149335	0.491297	0.640633	0.0611883	hypo
9	85265628	85266590	13323430	13323451	2127161	22	963	43.7727	61.5844	3.85424	0.14293	0.777135	0.634206	0.0466053	hyper
1	74944135	74945244	828671	828693	74538	23	1110	48.2609	-61.5528	-1.84679	-0.174536	0.515889	0.690425	0.0523465	hypo
4	75538585	75539237	5941319	5941334	1587168	16	653	40.8125	61.5323	4.50746	0.17217	0.750659	0.578489	0.044695	hyper
21	3545484	3545994	26235612	26235642	1029127	31	511	16.4839	61.5184	2.062	0.119079	0.739966	0.620887	0.0611813	hyper
4	12737112	12737699	5200333	5200357	1525615	25	588	23.52	-61.509	-2.33334	-0.122804	0.625392	0.748196	0.0574908	hypo
11	8764500	8765047	15175810	15175831	245659	22	548	24.9091	61.5074	3.20229	0.144222	0.667142	0.522919	0.0497293	hyper
5	22233232	22234057	6825469	6825495	1645806	27	826	30.5926	61.498	2.47025	0.145804	0.696658	0.550855	0.0527539	hyper
27	771380	771943	31273003	31273027	1290303	25	564	22.56	61.4896	2.91753	0.108636	0.586618	0.477982	0.0484492	hyper
13	76136496	76137252	18740262	18740281	464504	20	757	37.85	-61.4578	-2.33658	-0.127904	0.764534	0.892438	0.052447	hypo
9	43884863	43885603	12848371	12848394	2086033	24	741	30.875	-61.4366	-1.93074	-0.117136	0.713772	0.830908	0.0492391	hypo
14	1066030	1066233	18912356	18912372	468819	17	204	12	61.4325	4.80853	0.210027	0.653335	0.443308	0.0514319	hyper
12	4757162	4757736	16511397	16511419	334732	23	575	25	61.4228	3.7842	0.164258	0.713669	0.549411	0.0461839	hyper
17	14958472	14959324	22466540	22466556	692965	17	853	50.1765	61.3803	4.61602	0.186905	0.648374	0.461469	0.045955	hyper
9	53124359	53124889	12947166	12947187	2095623	22	531	24.1364	-61.3347	-2.04591	-0.138511	0.53299	0.671501	0.0448767	hypo
26	41868300	41869147	31077960	31077986	1284435	27	848	31.4074	61.3182	2.77641	0.117135	0.654778	0.537644	0.0498367	hyper
2	112013423	112013704	3155649	3155666	944769	18	282	15.6667	-61.3163	-2.00008	-0.157865	0.544291	0.702155	0.0504659	hypo
13	53067367	53068342	18378068	18378092	448565	25	976	39.04	-61.3106	-2.11444	-0.124758	0.583645	0.708403	0.0552795	hypo
24	26034135	26034947	29236066	29236085	1193163	20	813	40.65	-61.301	-1.85354	-0.137441	0.523993	0.661434	0.0520853	hypo
X	33298500	33299497	33598066	33598090	2165847	25	998	39.92	61.2919	2.69999	0.129562	0.652645	0.523083	0.0469767	hyper
1	79069502	79070660	873219	873244	78717	26	1159	44.5769	61.2866	2.53987	0.181247	0.743855	0.562608	0.0493006	hyper
20	71116529	71116827	26185154	26185175	1025507	22	299	13.5909	61.2842	3.43006	0.126204	0.444102	0.317898	0.0483921	hyper
12	36666068	36666545	16995566	16995585	359786	20	478	23.9	-61.274	-2.3527	-0.145492	0.177456	0.322948	0.0500613	hypo
18	59517990	59518890	24153439	24153461	785545	23	901	39.1739	-61.2574	-1.85609	-0.165403	0.473913	0.639315	0.0548439	hypo
11	64953698	64954128	15849781	15849803	298364	23	431	18.7391	-61.2531	-1.87457	-0.131114	0.122685	0.2538	0.0462323	hypo
8	70234351	70235461	11731947	11731968	2007426	22	1111	50.5	-61.2402	-1.95414	-0.122724	0.57419	0.696914	0.0479188	hypo
X	134891919	134892268	34694062	34694079	2264889	18	350	19.4444	-61.2354	-2.4141	-0.129301	0.598749	0.72805	0.0437708	hypo
11	78659479	78660104	16032073	16032097	310294	25	626	25.04	-61.2191	-1.90688	-0.129919	0.463841	0.593761	0.0534778	hypo
13	72897768	72898297	18685483	18685505	462414	23	530	23.0435	-61.2121	-2.16919	-0.132148	0.752257	0.884405	0.0487313	hypo
2	31431612	31432213	2255539	2255559	864541	21	602	28.6667	-61.2026	-1.97922	-0.149216	0.255369	0.404584	0.0523474	hypo
19	62556572	62557079	25230519	25230541	834167	23	508	22.087	-61.1767	-1.88325	-0.13454	0.6405	0.775041	0.0474262	hypo
25	26399469	26400378	30253662	30253686	1237984	25	910	36.4	61.1591	2.54887	0.142915	0.501026	0.358111	0.0486673	hyper
11	22679837	22680959	15357889	15357908	258163	20	1123	56.15	61.1549	3.7099	0.164177	0.760352	0.596175	0.044755	hyper
8	85486513	85487439	11926464	11926477	2021279	14	927	66.2143	61.1444	5.62489	0.207123	0.719362	0.512239	0.0468113	hyper
19	37080899	37081200	24802429	24802446	817494	18	302	16.7778	-61.131	-3.05101	-0.150928	0.53865	0.689579	0.0485666	hypo
8	6926407	6927447	10973404	10973423	1947450	20	1041	52.05	-61.1142	-2.35858	-0.132371	0.392719	0.52509	0.0450712	hypo
13	66879165	66879747	18589661	18589684	458298	24	583	24.2917	-61.0922	-1.88875	-0.113813	0.57476	0.688573	0.05416	hypo
3	117126939	117127794	4980711	4980733	1512219	23	856	37.2174	-61.0826	-1.9298	-0.132469	0.546613	0.679083	0.052011	hypo
8	60588167	60588630	11608998	11609016	1998916	19	464	24.4211	61.0601	4.15093	0.152683	0.69747	0.544787	0.0470628	hyper
1	78472259	78473190	865569	865586	78133	18	932	51.7778	-61.0542	-2.68538	-0.159148	0.691925	0.851073	0.0439277	hypo
24	53685925	53686350	29658001	29658023	1214746	23	426	18.5217	61.0465	2.89792	0.166116	0.656271	0.490155	0.0576207	hyper
22	6507472	6508178	27260370	27260394	1088483	25	707	28.28	61.0372	2.74664	0.176834	0.73013	0.553296	0.0522731	hyper
28	44352265	44352902	32566454	32566476	1363586	23	638	27.7391	-61.011	-1.97399	-0.120236	0.530679	0.650915	0.0475776	hypo
3	84205650	84206265	4509692	4509716	1485917	25	616	24.64	-61.0005	-2.08884	-0.10815	0.434217	0.542368	0.0459982	hypo
18	20525019	20526133	23593944	23593973	755008	30	1115	37.1667	60.9961	3.31099	0.157626	0.375285	0.217658	0.0596556	hyper
14	23278180	23278707	19255823	19255844	485243	22	528	24	60.9916	3.30123	0.132163	0.500709	0.368546	0.0492158	hyper
1	70556973	70557886	770504	770517	70654	14	914	65.2857	60.9711	5.02853	0.274773	0.820232	0.545459	0.0456469	hyper
X	90740614	90741725	34168075	34168095	2223505	21	1112	52.9524	60.9442	3.40602	0.126586	0.670245	0.543659	0.0439162	hyper
14	19754835	19755433	19199937	19199957	482603	21	599	28.5238	-60.9398	-1.95032	-0.14337	0.238799	0.382169	0.0489714	hypo
16	32306047	32306590	21548149	21548166	641957	18	544	30.2222	-60.9315	-2.9036	-0.141474	0.447228	0.588702	0.0447181	hypo
14	19083295	19083661	19188039	19188057	482144	19	367	19.3158	60.9087	3.95881	0.187126	0.514778	0.327652	0.0478138	hyper
5	91045984	91047197	7660651	7660671	1709859	21	1214	57.8095	-60.8781	-1.90103	-0.124699	0.558376	0.683075	0.0466288	hypo
8	4549247	4550044	10941551	10941571	1945318	21	798	38	-60.8736	-2.131	-0.121359	0.484142	0.605501	0.0462269	hypo
26	23208557	23209097	30811719	30811743	1269192	25	541	21.64	-60.8497	-1.83856	-0.144769	0.359573	0.504342	0.0604614	hypo
28	25964077	25964658	32299507	32299524	1348867	18	582	32.3333	-60.8186	-1.95368	-0.166844	0.56468	0.731524	0.0511111	hypo
12	21436658	21437222	16748942	16748970	348542	29	565	19.4828	60.7954	2.21232	0.115845	0.828093	0.712248	0.0452237	hyper
17	35524643	35524908	22689455	22689481	713428	27	266	9.85185	60.7953	2.50125	0.149499	0.325813	0.176314	0.0528786	hyper
19	51888615	51889390	25020402	25020420	828550	19	776	40.8421	-60.7909	-2.11039	-0.19565	0.547838	0.743487	0.0591641	hypo
25	32913570	32914640	30361237	30361268	1242519	32	1071	33.4688	60.7694	2.0444	0.154073	0.324707	0.170634	0.0652888	hyper
10	101105312	101106003	14981551	14981574	238742	24	692	28.8333	60.769	2.98333	0.120541	0.491243	0.370703	0.0557648	hyper
26	18757107	18757570	30752765	30752789	1265424	25	464	18.56	-60.7481	-2.06719	-0.121316	0.473114	0.59443	0.0539813	hypo
29	42219911	42220880	33170558	33170580	1399999	23	970	42.1739	60.7362	3.30616	0.175785	0.501053	0.325268	0.0733608	hyper
11	22079195	22079700	15350888	15350903	257571	16	506	31.625	60.7347	5.00512	0.205104	0.774774	0.56967	0.0451434	hyper
19	15030561	15031398	24449517	24449537	802545	21	838	39.9048	-60.73	-1.84064	-0.109685	0.585792	0.695477	0.0480456	hypo
11	50153378	50153896	15696666	15696681	283235	16	519	32.4375	-60.7027	-3.29921	-0.155675	0.725371	0.881045	0.0499577	hypo
10	4578109	4578880	13722570	13722587	154659	18	772	42.8889	60.6974	4.08798	0.176779	0.714454	0.537675	0.0471655	hyper
19	58342954	58343756	25133490	25133510	832140	21	803	38.2381	60.6739	3.36986	0.132346	0.810702	0.678356	0.0481783	hyper
29	49691580	49692240	33290883	33290904	1404269	22	661	30.0455	-60.6722	-1.90914	-0.13183	0.580756	0.712586	0.0568937	hypo
14	28977550	28978380	19337372	19337392	489995	21	831	39.5714	-60.6578	-1.96333	-0.117074	0.599664	0.716738	0.0448571	hypo
8	111278359	111278967	12295244	12295267	2042640	24	609	25.375	60.6541	2.74703	0.106379	0.700043	0.593664	0.0448923	hyper
5	97515330	97515917	7742422	7742439	1715850	18	588	32.6667	-60.6505	-1.93722	-0.188528	0.432243	0.620771	0.0521566	hypo
12	50538586	50539029	17126619	17126644	374461	26	444	17.0769	60.6499	2.57778	0.146469	0.478808	0.332339	0.0546598	hyper
24	50290329	50291145	29606351	29606373	1212015	23	817	35.5217	60.6424	3.07182	0.170277	0.728226	0.557949	0.0507559	hyper
26	41442443	41443153	31069492	31069510	1284200	19	711	37.4211	-60.6343	-2.3452	-0.151375	0.640047	0.791422	0.0550592	hypo
1	76610877	76611354	845790	845804	76266	15	478	31.8667	-60.6053	-3.95656	-0.275426	0.53838	0.813806	0.0480258	hypo
1	61731312	61732280	663737	663763	62248	27	969	35.8889	-60.6048	-1.83521	-0.107272	0.532442	0.639714	0.0465937	hypo
24	2581857	2582461	28935768	28935791	1171787	24	605	25.2083	60.5921	2.9355	0.172623	0.557038	0.384415	0.0696757	hyper
21	10320942	10321920	26326593	26326618	1035009	26	979	37.6538	60.5733	3.33448	0.11113	0.72169	0.61056	0.0451274	hyper
2	14632486	14633291	2034414	2034427	848966	14	806	57.5714	60.5699	4.55174	0.271883	0.696048	0.424165	0.0508178	hyper
18	8026371	8026998	23397994	23398012	746293	19	628	33.0526	-60.5146	-2.2131	-0.158871	0.502992	0.661863	0.0506653	hypo
1	76402286	76402994	843685	843700	76037	16	709	44.3125	60.4873	4.26232	0.242612	0.727029	0.484417	0.0446979	hyper
27	42182784	42183452	31912523	31912548	1322759	26	669	25.7308	60.4759	2.54954	0.114196	0.766973	0.652777	0.0453724	hyper
5	84006221	84006683	7576451	7576473	1702964	23	463	20.1304	-60.4746	-2.17199	-0.102779	0.378054	0.480833	0.0456111	hypo
20	71384085	71384833	26187414	26187437	1025646	24	749	31.2083	60.4692	3.09014	0.132578	0.789221	0.656642	0.0480197	hyper
2	15330179	15330788	2043092	2043117	849632	26	610	23.4615	-60.468	-2.0053	-0.15818	0.496061	0.654241	0.0647582	hypo
1	140999086	140999517	1579355	1579381	139311	27	432	16	60.4536	2.41345	0.109509	0.439679	0.33017	0.0561906	hyper
11	97994276	97994868	16319737	16319757	325053	21	593	28.2381	-60.4413	-2.24256	-0.105678	0.767205	0.872882	0.0536103	hypo
12	74230183	74230676	17368493	17368518	397086	26	494	19	60.4391	2.67628	0.140229	0.525657	0.385428	0.0515158	hyper
23	47881580	47882010	28782520	28782545	1167847	26	431	16.5769	-60.4292	-1.83605	-0.101353	0.655778	0.757131	0.0471848	hypo
10	2209064	2210098	13691794	13691815	152585	22	1035	47.0455	60.4286	3.08538	0.144888	0.837708	0.69282	0.0442462	hyper
11	105786791	105787421	16445305	16445327	329446	23	631	27.4348	-60.4054	-1.8921	-0.119257	0.440522	0.559779	0.0538897	hypo
26	28047770	28048606	30873492	30873519	1273376	28	837	29.8929	60.4048	2.27222	0.128503	0.747456	0.618953	0.0534547	hyper
12	75749195	75750215	17398271	17398298	397956	28	1021	36.4643	60.3923	2.50626	0.115974	0.641992	0.526019	0.0536848	hyper
10	78398794	78399658	14640403	14640426	220808	24	865	36.0417	60.3787	2.94071	0.136258	0.740364	0.604106	0.0477693	hyper
10	43891915	43892127	14211058	14211083	188516	26	213	8.19231	-60.3766	-2.21659	-0.157548	0.487225	0.644772	0.0793681	hypo
14	76093961	76094670	19938293	19938312	533505	20	710	35.5	60.3694	4.24825	0.183559	0.770133	0.586574	0.0497667	hyper
10	3607718	3609105	13708289	13708313	153897	25	1388	55.52	60.3558	2.61492	0.184331	0.684459	0.500128	0.0518281	hyper
25	37786903	37787573	30445039	30445059	1245412	21	671	31.9524	-60.3454	-2.00975	-0.134771	0.455357	0.590128	0.0529248	hypo
18	38020723	38021369	23825729	23825751	770282	23	647	28.1304	-60.3326	-1.90055	-0.158708	0.374805	0.533513	0.0664617	hypo
11	95499615	95500511	16279891	16279911	323247	21	897	42.7143	60.2899	3.74756	0.1491	0.604661	0.455562	0.0487307	hyper
12	86987266	86987596	17613599	17613619	404909	21	331	15.7619	-60.2876	-2.30765	-0.149449	0.224757	0.374206	0.0551695	hypo
6	97941120	97941539	9193633	9193656	1827960	24	420	17.5	-60.2733	-2.17063	-0.133554	0.484687	0.618242	0.0549406	hypo
28	45147015	45147924	32580410	32580433	1364095	24	910	37.9167	-60.2703	-1.8951	-0.109312	0.604424	0.713735	0.0492552	hypo
25	32407615	32408316	30351359	30351380	1242235	22	702	31.9091	60.2606	3.3318	0.194983	0.756865	0.561882	0.057358	hyper
24	60288788	60289392	29793172	29793192	1218507	21	605	28.8095	60.2372	3.31092	0.172494	0.705927	0.533433	0.0568057	hyper
9	94892686	94892967	13473058	13473078	2134560	21	282	13.4286	-60.2026	-2.62461	-0.141097	0.319167	0.460264	0.0488374	hypo
15	38150768	38151586	20518034	20518057	572648	24	819	34.125	60.1823	3.13024	0.114526	0.578572	0.464046	0.0467941	hyper
16	71978405	71979679	22094647	22094669	674666	23	1275	55.4348	-60.1785	-2.41412	-0.12372	0.678108	0.801828	0.0482643	hypo
13	81809473	81809916	18867311	18867337	467173	27	444	16.4444	-60.1738	-1.90733	-0.113303	0.472407	0.585711	0.0553293	hypo
7	4238895	4239986	9540923	9540944	1845899	22	1092	49.6364	-60.1732	-1.94053	-0.159413	0.549466	0.708879	0.0584365	hypo
2	131395061	131395414	3443583	3443603	959508	21	354	16.8571	60.1684	3.16292	0.157472	0.793708	0.636236	0.0571833	hyper
10	102748801	102749476	15018423	15018444	239504	22	676	30.7273	-60.135	-2.14119	-0.136669	0.542248	0.678917	0.0518852	hypo
6	17092070	17092836	8293406	8293434	1747643	29	767	26.4483	60.118	2.16444	0.130311	0.547174	0.416863	0.0459934	hyper
15	51775266	51775898	20678424	20678441	584886	18	633	35.1667	60.1024	3.64375	0.165085	0.693829	0.528743	0.0476876	hyper
7	88308414	88308996	10572720	10572743	1921630	24	583	24.2917	-60.0947	-1.89981	-0.15168	0.399882	0.551562	0.0624163	hypo
7	101739398	101739857	10745162	10745187	1934089	26	460	17.6923	-60.0845	-1.93589	-0.111259	0.600395	0.711655	0.0455108	hypo
20	642498	643026	25256455	25256478	962728	24	529	22.0417	-60.0811	-1.83693	-0.119594	0.579286	0.69888	0.0511023	hypo
4	20806115	20806802	5301002	5301025	1533215	24	688	28.6667	-60.0477	-2.0677	-0.103255	0.639365	0.742619	0.0468945	hypo
10	9110547	9110828	13792537	13792559	158215	23	282	12.2609	60.0425	2.93395	0.139672	0.938019	0.798347	0.0451656	hyper
24	8521587	8522111	29032659	29032680	1176313	22	525	23.8636	-60.0185	-1.89669	-0.129612	0.447803	0.577416	0.0498296	hypo
11	62499228	62500248	15815112	15815132	296240	21	1021	48.619	-60.0039	-1.95559	-0.130315	0.536672	0.666987	0.0481965	hypo
22	7514367	7515289	27280099	27280119	1089018	21	923	43.9524	59.9803	3.45513	0.168133	0.708612	0.540479	0.0474451	hyper
X	121489744	121490786	34505442	34505467	2253938	26	1043	40.1154	59.9778	2.75283	0.105932	0.743626	0.637694	0.0397685	hyper
9	32189604	32190252	12699971	12699993	2075026	23	649	28.2174	-59.9737	-1.88459	-0.123068	0.572733	0.695802	0.0499213	hypo
8	109304163	109304859	12253024	12253047	2041589	24	697	29.0417	-59.9688	-1.94527	-0.129905	0.388221	0.518126	0.0548602	hypo
10	8392036	8392881	13780622	13780642	157667	21	846	40.2857	59.9478	3.45927	0.179753	0.757584	0.577831	0.0517247	hyper
21	42118114	42118855	26766426	26766444	1061117	19	742	39.0526	-59.9475	-2.82183	-0.19357	0.53939	0.73296	0.0583071	hypo
9	27469737	27470843	12647608	12647631	2070275	24	1107	46.125	59.9463	2.78831	0.158706	0.720121	0.561414	0.0442794	hyper
29	31771994	31772606	33013952	33013979	1392374	28	613	21.8929	59.9257	2.30824	0.120371	0.749784	0.629413	0.0482007	hyper
7	80633885	80634506	10483953	10483976	1914074	24	622	25.9167	59.9177	3.61038	0.170992	0.816586	0.645594	0.045245	hyper
12	14911245	14912598	16644583	16644606	343630	24	1354	56.4167	-59.9097	-1.86687	-0.221717	0.505876	0.727594	0.0528107	hypo
18	25988435	25989093	23678351	23678368	759032	18	659	36.6111	59.9005	3.84766	0.164293	0.75304	0.588748	0.0474087	hyper
X	87014056	87014709	34127717	34127739	2220077	23	654	28.4348	59.9004	3.25989	0.129561	0.515249	0.385689	0.041256	hyper
24	2715551	2716075	28938863	28938884	1171845	22	525	23.8636	59.8993	2.90368	0.130544	0.779117	0.648573	0.0484575	hyper
18	13449875	13450334	23494767	23494791	749542	25	460	18.4	59.874	2.71856	0.115921	0.922956	0.807035	0.0468527	hyper
6	113263329	113263633	9411714	9411730	1840146	17	305	17.9412	-59.8719	-1.92604	-0.167455	0.270769	0.438224	0.0485619	hypo
19	60336179	60336559	25179144	25179163	833090	20	381	19.05	-59.8529	-1.84317	-0.127271	0.52798	0.655251	0.0503804	hypo
28	7337405	7337997	32072925	32072946	1331266	22	593	26.9545	-59.8408	-2.05733	-0.106888	0.450757	0.557645	0.0543809	hypo
23	48206578	48207108	28789971	28789995	1168008	25	531	21.24	59.8073	2.90442	0.140517	0.601557	0.46104	0.0629307	hyper
17	61288979	61289538	23052914	23052930	734286	17	560	32.9412	-59.8055	-2.29287	-0.165803	0.313108	0.478911	0.0505909	hypo
28	4511167	4512206	32029615	32029636	1329096	22	1040	47.2727	59.77	3.05525	0.139232	0.688242	0.54901	0.0469829	hyper
29	29665372	29665982	32980638	32980659	1390901	22	611	27.7727	-59.7601	-1.87719	-0.162222	0.684316	0.846539	0.0542052	hypo
14	31375877	31376542	19371678	19371700	492078	23	666	28.9565	-59.7565	-1.84551	-0.13505	0.525204	0.660255	0.0466904	hypo
5	19591767	19592837	6793791	6793815	1643240	25	1071	42.84	59.7489	2.88405	0.13551	0.851866	0.716357	0.0490552	hyper
8	76144770	76145037	11811809	11811830	2012478	22	268	12.1818	-59.7406	-1.94286	-0.109513	0.596823	0.706336	0.0505983	hypo
19	23468871	23469427	24588099	24588116	808158	18	557	30.9444	59.7286	3.68861	0.175449	0.552121	0.376672	0.0472361	hyper
16	8653739	8654304	21260852	21260865	619770	14	566	40.4286	59.712	4.39809	0.244068	0.737194	0.493126	0.0468052	hyper
12	76672463	76672910	17417139	17417164	398461	26	448	17.2308	-59.6992	-1.92217	-0.11772	0.538824	0.656544	0.0452687	hypo
16	29929076	29930014	21513813	21513835	639959	23	939	40.8261	-59.6931	-1.87617	-0.128286	0.475617	0.603903	0.062587	hypo
15	58584226	58584734	20763678	20763698	590914	21	509	24.2381	-59.6557	-2.51089	-0.140245	0.310316	0.45056	0.0484355	hypo
25	32063270	32064975	30345307	30345330	1242040	24	1706	71.0833	59.6201	2.90335	0.172201	0.612813	0.440612	0.050453	hyper
8	2055040	2055461	10917873	10917896	1942783	24	422	17.5833	59.6175	2.66123	0.117072	0.721517	0.604445	0.0485578	hyper
7	5927764	5928305	9566834	9566854	1846972	21	542	25.8095	-59.6142	-1.99905	-0.188176	0.587373	0.775549	0.0639085	hypo
7	99465238	99466245	10718657	10718682	1931881	26	1008	38.7692	-59.5887	-1.88803	-0.12975	0.426157	0.555907	0.0559018	hypo
19	5153673	5154330	24294345	24294362	795007	18	658	36.5556	59.5861	4.02009	0.305133	0.895298	0.590165	0.0460403	hyper
X	86915711	86916202	34126582	34126602	2219989	21	492	23.4286	-59.5718	-1.82778	-0.128667	0.352204	0.480872	0.0523437	hypo
19	8039510	8040254	24335897	24335919	797340	23	745	32.3913	59.5562	2.86843	0.114366	0.801039	0.686673	0.0462014	hyper
8	5213192	5215168	10949282	10949306	1945963	25	1977	79.08	59.5512	2.68604	0.17698	0.479188	0.302208	0.0588474	hyper
12	81845424	81846194	17504409	17504433	402229	25	771	30.84	-59.5507	-1.9502	-0.112196	0.584628	0.696824	0.048177	hypo
13	56282752	56283878	18424065	18424086	450781	22	1127	51.2273	-59.4985	-1.91192	-0.122122	0.433849	0.555971	0.045948	hypo
1	155789310	155789775	1829269	1829290	149207	22	466	21.1818	59.4638	3.12988	0.134053	0.650561	0.516508	0.0487958	hyper
2	96964047	96964758	2978817	2978842	930443	26	712	27.3846	59.4589	2.56876	0.119236	0.705029	0.585792	0.0483716	hyper
2	66674192	66674664	2642850	2642874	900440	25	473	18.92	-59.4061	-2.22773	-0.117023	0.69926	0.816283	0.0494688	hypo
12	26603805	26604752	16826903	16826925	352666	23	948	41.2174	59.4024	3.0982	0.136311	0.650848	0.514537	0.0512234	hyper
6	117503927	117504442	9480629	9480653	1842418	25	516	20.64	-59.3793	-1.94221	-0.100384	0.642364	0.742747	0.0451069	hypo
22	7596998	7597252	27281459	27281478	1089076	20	255	12.75	-59.3627	-2.67679	-0.118613	0.602569	0.721182	0.045078	hypo
23	37599557	37600042	28590762	28590781	1161399	20	486	24.3	-59.305	-2.0414	-0.115993	0.518332	0.634324	0.0485632	hypo
9	90783175	90784145	13404326	13404351	2131626	26	971	37.3462	-59.2988	-2.12432	-0.168689	0.550599	0.719287	0.0726507	hypo
10	61266960	61267696	14425605	14425623	204796	19	737	38.7895	-59.2969	-2.15631	-0.130152	0.610178	0.74033	0.0524692	hypo
1	53886859	53887205	577465	577489	54320	25	347	13.88	-59.2893	-1.87526	-0.100819	0.664336	0.765155	0.0455344	hypo
7	6329402	6330050	9574473	9574490	1847193	18	649	36.0556	-59.2846	-2.17603	-0.180269	0.645732	0.826001	0.0478376	hypo
21	53955492	53956653	26903585	26903602	1072860	18	1162	64.5556	59.2756	3.6773	0.188509	0.721554	0.533045	0.0485567	hyper
8	84512289	84513292	11914476	11914498	2020421	23	1004	43.6522	-59.2486	-1.94541	-0.155052	0.61725	0.772302	0.0657006	hypo
13	80358548	80359343	18830299	18830318	466612	20	796	39.8	59.2445	3.32844	0.192673	0.732127	0.539454	0.0558188	hyper
22	51030639	51030981	27899719	27899742	1125229	24	343	14.2917	59.2407	2.62333	0.123144	0.593798	0.470654	0.0495205	hyper
23	41805429	41805983	28662802	28662820	1164304	19	555	29.2105	59.2386	3.83841	0.169936	0.722345	0.552409	0.0502339	hyper
8	102412226	102412847	12142753	12142778	2036551	26	622	23.9231	-59.2372	-1.85347	-0.117258	0.818407	0.935666	0.0509236	hypo
6	116331810	116332105	9464548	9464571	1841820	24	296	12.3333	59.2279	3.75322	0.127323	0.815598	0.688275	0.0487438	hyper
26	10165762	10166248	30635614	30635632	1258067	19	487	25.6316	59.2133	3.5165	0.186264	0.765488	0.579224	0.054507	hyper
9	18498281	18498828	12533862	12533879	2061849	18	548	30.4444	-59.1993	-1.88019	-0.195419	0.677468	0.872888	0.0603199	hypo
18	26945570	26946061	23692144	23692161	759836	18	492	27.3333	59.1824	3.81867	0.120159	0.771829	0.65167	0.0513382	hyper
11	103109362	103109965	16411398	16411415	327972	18	604	33.5556	59.1634	3.94239	0.168166	0.7277	0.559534	0.0470008	hyper
24	41998845	41999758	29477189	29477213	1205925	25	914	36.56	59.1603	2.70387	0.151885	0.790928	0.639043	0.0496815	hyper
1	105374681	105375397	1164429	1164450	104863	22	717	32.5909	-59.1521	-1.84305	-0.111206	0.651102	0.762307	0.0442123	hypo
19	19337144	19337519	24521619	24521639	805342	21	376	17.9048	-59.1428	-1.94358	-0.134203	0.389716	0.523919	0.0510285	hypo
6	26376546	26376879	8407900	8407918	1756501	19	334	17.5789	59.1352	3.81509	0.193607	0.690081	0.496474	0.0511928	hyper
12	52619163	52619541	17152300	17152321	376425	22	379	17.2273	59.1334	3.13677	0.106839	0.340623	0.233784	0.0486281	hyper
1	119919083	119919746	1334713	1334734	119081	22	664	30.1818	-59.1333	-2.2018	-0.111702	0.530416	0.642117	0.0448109	hypo
8	96760894	96761972	12057417	12057442	2032013	26	1079	41.5	59.1181	2.8296	0.138672	0.762747	0.624075	0.0454799	hyper
8	111179741	111180341	12293285	12293308	2042581	24	601	25.0417	59.1175	2.76267	0.140283	0.700207	0.559924	0.0497818	hyper
5	116954109	116954803	8048333	8048357	1729213	25	695	27.8	-59.0873	-1.84952	-0.115807	0.382662	0.498469	0.0556488	hypo
3	116271123	116271983	4964123	4964149	1511770	27	861	31.8889	59.079	2.46091	0.139004	0.776416	0.637412	0.0452374	hyper
18	8270548	8271332	23402722	23402741	746433	20	785	39.25	-59.0781	-2.00239	-0.144277	0.618432	0.762708	0.0515718	hypo
7	88525405	88526204	10576037	10576053	1921819	17	800	47.0588	-59.047	-2.52413	-0.176181	0.470325	0.646506	0.0482152	hypo
13	14358214	14358387	17817469	17817480	417126	12	174	14.5	-59.0192	-4.60381	-0.309943	0.287446	0.597389	0.0506292	hypo
7	77524354	77525225	10442296	10442325	1911273	30	872	29.0667	59.0106	2.05952	0.129828	0.592309	0.462481	0.0535163	hyper
5	97193267	97194499	7736651	7736676	1715652	26	1233	47.4231	58.9434	2.79568	0.134532	0.724209	0.589677	0.0517507	hyper
16	72309806	72311084	22099543	22099568	674911	26	1279	49.1923	58.9	2.3588	0.118316	0.576275	0.457959	0.0443282	hyper
23	9018977	9019319	28194829	28194852	1138596	24	343	14.2917	-58.8999	-2.06279	-0.120029	0.673077	0.793106	0.0656138	hypo
21	15130396	15131413	26399600	26399619	1038758	20	1018	50.9	-58.8938	-1.98566	-0.131198	0.524762	0.65596	0.0464571	hypo
12	14644191	14644696	16640625	16640647	343400	23	506	22	-58.8918	-1.90227	-0.122917	0.523525	0.646442	0.0506095	hypo
27	26493669	26494581	31638645	31638668	1312129	24	913	38.0417	58.883	2.79366	0.141632	0.544513	0.402881	0.0545137	hyper
16	49275604	49276068	21775227	21775246	656257	20	465	23.25	-58.8742	-2.18489	-0.138841	0.315337	0.454177	0.046306	hypo
5	24320805	24321358	6855776	6855799	1647559	24	554	23.0833	-58.8728	-1.9266	-0.139007	0.43916	0.578167	0.0567498	hypo
8	88379983	88380783	11960111	11960126	2024022	16	801	50.0625	-58.859	-2.08988	-0.173813	0.520641	0.694453	0.05364	hypo
10	2396417	2397345	13694265	13694283	152745	19	929	48.8947	58.8551	3.74418	0.143199	0.77577	0.632572	0.045002	hyper
4	95278324	95278975	6177473	6177490	1605667	18	652	36.2222	-58.8391	-2.13063	-0.180647	0.4376	0.618247	0.0508179	hypo
15	30142487	30142994	20404355	20404376	566147	22	508	23.0909	-58.8315	-1.83259	-0.128503	0.471741	0.600243	0.0475078	hypo
1	67580478	67580953	731052	731063	68080	12	476	39.6667	58.8269	6.41643	0.243937	0.834671	0.590734	0.0454088	hyper
11	24556585	24556953	15378747	15378767	260050	21	369	17.5714	58.8236	3.39688	0.149092	0.402042	0.25295	0.0522284	hyper
18	38734201	38735052	23836593	23836616	770834	24	852	35.5	58.7775	3.08364	0.127124	0.636714	0.50959	0.0475685	hyper
5	33685287	33686021	6982454	6982469	1655380	16	735	45.9375	58.7768	4.12902	0.278288	0.741536	0.463248	0.0588473	hyper
17	17859671	17860443	22507883	22507910	695426	28	773	27.6071	58.7658	2.62797	0.116896	0.866587	0.749691	0.0464811	hyper
9	57870573	57871560	12990263	12990288	2100821	26	988	38	58.7602	2.39927	0.125852	0.658707	0.532855	0.0449757	hyper
19	62615065	62615894	25231865	25231891	834198	27	830	30.7407	58.7518	2.63371	0.105532	0.814116	0.708584	0.0479316	hyper
23	43158885	43159583	28690371	28690392	1165010	22	699	31.7727	-58.7517	-1.82935	-0.108404	0.385162	0.493567	0.0484084	hypo
7	98005527	98006006	10702453	10702477	1930427	25	480	19.2	58.7423	2.58847	0.176643	0.460481	0.283838	0.0664216	hyper
10	101332807	101333535	14987415	14987441	238821	27	729	27	-58.7378	-1.83579	-0.102687	0.654327	0.757014	0.0542973	hypo
5	71405294	71405830	7425205	7425225	1691433	21	537	25.5714	-58.7312	-2.33495	-0.17079	0.415184	0.585973	0.0690999	hypo
20	6460952	6462045	25354871	25354896	966660	26	1094	42.0769	58.723	2.58276	0.125184	0.745379	0.620195	0.0460216	hyper
22	55599152	55599532	27979105	27979128	1128080	24	381	15.875	58.7222	2.56437	0.168186	0.824097	0.655911	0.0642962	hyper
16	29345670	29346397	21504470	21504494	639585	25	728	29.12	58.7141	2.63292	0.117816	0.797	0.679184	0.0478963	hyper
1	95892686	95893804	1067408	1067429	95070	22	1119	50.8636	-58.6639	-1.91194	-0.107065	0.307478	0.414542	0.0467948	hypo
5	29863956	29864434	6935171	6935190	1651982	20	479	23.95	58.6516	3.58582	0.138667	0.454567	0.3159	0.0467794	hyper
4	10308949	10309257	5167083	5167108	1523437	26	309	11.8846	-58.6387	-1.92931	-0.143105	0.378306	0.52141	0.0701561	hypo
23	11369298	11370110	28233519	28233539	1140232	21	813	38.7143	58.6306	3.4384	0.147152	0.846508	0.699356	0.0479415	hyper
10	4784607	4784995	13725594	13725615	154826	22	389	17.6818	58.6287	2.86928	0.131948	0.478795	0.346847	0.0489903	hyper
26	37002961	37004112	30997045	30997071	1281024	27	1152	42.6667	58.6151	2.44264	0.198941	0.75892	0.559978	0.0512784	hyper
22	6333498	6334065	27257226	27257241	1088376	16	568	35.5	-58.6062	-2.02666	-0.158459	0.688621	0.84708	0.0463218	hypo
6	25602114	25602645	8397162	8397180	1755823	19	532	28	-58.593	-1.85404	-0.182442	0.261209	0.443652	0.0574098	hypo
21	52590662	52591329	26890660	26890677	1071445	18	668	37.1111	58.5889	3.62717	0.255138	0.714808	0.45967	0.0579557	hyper
3	56569980	56570848	4213247	4213264	1457674	18	869	48.2778	-58.572	-2.25182	-0.119182	0.614517	0.733699	0.0438186	hypo
13	76483369	76483950	18746953	18746972	464688	20	582	29.1	-58.5541	-1.91026	-0.128263	0.452376	0.58064	0.0469501	hypo
9	753466	753920	12340354	12340374	2044457	21	455	21.6667	58.5507	3.08097	0.162424	0.541761	0.379337	0.0504047	hyper
18	57875321	57875710	24128414	24128434	784335	21	390	18.5714	58.5461	3.2695	0.141312	0.238054	0.0967414	0.0489832	hyper
9	80146468	80147148	13257893	13257904	2122456	12	681	56.75	58.5369	5.17459	0.22799	0.710994	0.483004	0.0467096	hyper
7	7798102	7798847	9595369	9595384	1848366	16	746	46.625	58.5362	4.46361	0.186536	0.724166	0.53763	0.0482533	hyper
14	63952715	63953404	19766364	19766386	522995	23	690	30	58.5353	3.35397	0.159627	0.613674	0.454047	0.0521722	hyper
8	91339222	91340074	11999739	11999761	2026623	23	853	37.087	58.5073	2.90232	0.145649	0.641584	0.495935	0.0538771	hyper
13	43893570	43894301	18261920	18261940	440244	21	732	34.8571	-58.5012	-1.91951	-0.133787	0.625743	0.75953	0.0443517	hypo
18	41870347	41871154	23884056	23884079	773241	24	808	33.6667	58.4959	2.7598	0.11701	0.710179	0.593168	0.0472812	hyper
21	60082841	60083706	26993496	26993518	1077568	23	866	37.6522	-58.4918	-1.83094	-0.150061	0.646702	0.796762	0.0680321	hypo
11	74667752	74668088	15980838	15980860	306734	23	337	14.6522	-58.4904	-2.03324	-0.111081	0.195031	0.306112	0.0569881	hypo
14	16121906	16122492	19149344	19149367	479492	24	587	24.4583	-58.4891	-1.86235	-0.112411	0.419332	0.531744	0.0474212	hypo
4	70585230	70586087	5886449	5886471	1582231	23	858	37.3043	58.4816	2.87631	0.123556	0.649095	0.52554	0.045759	hyper
1	79387961	79388646	878013	878036	78966	24	686	28.5833	-58.4781	-1.90356	-0.122181	0.394215	0.516397	0.0466759	hypo
11	22568542	22569096	15356627	15356648	258045	22	555	25.2273	-58.4667	-2.61785	-0.176306	0.683613	0.859919	0.0480336	hypo
21	27199213	27199780	26582625	26582652	1047634	28	568	20.2857	-58.4643	-1.82696	-0.150607	0.617566	0.768173	0.0461169	hypo
1	90040850	90042096	1007027	1007052	88952	26	1247	47.9615	-58.4642	-1.82884	-0.104041	0.604465	0.708506	0.0499052	hypo
2	133060021	133060688	3472429	3472450	960500	22	668	30.3636	-58.4529	-1.91641	-0.129246	0.461176	0.590422	0.0445881	hypo
22	55866882	55867229	27985182	27985205	1128206	24	348	14.5	58.4402	2.6656	0.108795	0.72381	0.615015	0.045807	hyper
13	44606654	44607313	18272857	18272880	440813	24	660	27.5	-58.4273	-2.29239	-0.129606	0.359882	0.489488	0.0514861	hypo
19	50548702	50548992	25001459	25001478	827713	20	291	14.55	58.4129	3.43402	0.149573	0.59939	0.449817	0.0490515	hyper
7	94722713	94723440	10658049	10658075	1927513	27	728	26.963	-58.3938	-1.82815	-0.143772	0.476629	0.620401	0.0638123	hypo
20	57299980	57300650	25960424	25960447	1015497	24	671	27.9583	58.3444	2.61552	0.109943	0.856363	0.746421	0.0475063	hyper
13	70038801	70039350	18638402	18638427	460534	26	550	21.1538	58.3346	2.46688	0.106518	0.694054	0.587536	0.0454582	hyper
10	5437434	5438406	13735576	13735602	155340	27	973	36.037	58.3176	2.47762	0.137053	0.782054	0.645001	0.0526649	hyper
23	51447527	51447771	28866628	28866657	1169549	30	245	8.16667	-58.2822	-1.86227	-0.130435	0.4277	0.558136	0.0740034	hypo
18	6672901	6673685	23372067	23372090	745471	24	785	32.7083	-58.2769	-2.08564	-0.11641	0.481048	0.597457	0.0519683	hypo
23	10440157	10440621	28217538	28217565	1139629	28	465	16.6071	58.2619	2.10113	0.123612	0.717514	0.593902	0.0481704	hyper
8	104742679	104743725	12181988	12182010	2038126	23	1047	45.5217	58.2605	2.97024	0.140721	0.763853	0.623131	0.0446306	hyper
16	2504724	2505426	21185685	21185700	614305	16	703	43.9375	-58.2576	-1.85255	-0.247986	0.501237	0.749224	0.0496177	hypo
3	105746843	105747790	4787616	4787640	1504821	25	948	37.92	-58.2559	-1.97654	-0.108672	0.476117	0.584788	0.0450771	hypo
19	57170490	57171024	25111491	25111511	831525	21	535	25.4762	-58.2519	-2.16589	-0.155447	0.524961	0.680408	0.0536148	hypo
24	37162539	37162906	29392983	29393000	1202683	18	368	20.4444	-58.2477	-2.05224	-0.157765	0.460593	0.618358	0.0549805	hypo
5	65415640	65416198	7343476	7343505	1686283	30	559	18.6333	58.2459	1.98598	0.100827	0.737082	0.636255	0.0453146	hyper
14	19187480	19187837	19189619	19189646	482226	28	358	12.7857	-58.2377	-1.99739	-0.101436	0.360933	0.462369	0.0489777	hypo
2	128001274	128001628	3384162	3384180	957464	19	355	18.6842	58.2335	3.34149	0.139266	0.674376	0.53511	0.0528666	hyper
12	12943378	12944222	16610476	16610499	342308	24	845	35.2083	-58.2086	-2.11147	-0.121125	0.431952	0.553077	0.0482794	hypo
24	61224408	61224677	29814175	29814194	1219024	20	270	13.5	-58.1886	-1.97913	-0.133671	0.539197	0.672868	0.0467364	hypo
20	7325490	7325943	25368672	25368695	967286	24	454	18.9167	-58.1865	-2.02944	-0.107602	0.509975	0.617577	0.0505602	hypo
14	75132072	75132953	19926357	19926380	532585	24	882	36.75	58.1792	2.62989	0.161156	0.671291	0.510134	0.0500355	hyper
22	11716973	11717541	27343404	27343424	1092252	21	569	27.0952	-58.1599	-2.01594	-0.115129	0.764206	0.879334	0.0451349	hypo
15	61854552	61855169	20803136	20803162	594115	27	618	22.8889	-58.1587	-1.84619	-0.152908	0.52967	0.682578	0.0466009	hypo
11	80824142	80824609	16061551	16061564	312124	14	468	33.4286	-58.1577	-2.9812	-0.225437	0.715338	0.940775	0.0496187	hypo
5	25955719	25956102	6878941	6878963	1648935	23	384	16.6957	58.1541	2.68434	0.176786	0.735108	0.558322	0.0580009	hyper
22	42995626	42996739	27783965	27783983	1118862	19	1114	58.6316	58.1423	3.77253	0.144021	0.808801	0.66478	0.0473207	hyper
18	9354839	9355735	23420659	23420683	747146	25	897	35.88	-58.1395	-1.84799	-0.148479	0.522713	0.671192	0.0597272	hypo
15	82968803	82969361	21113270	21113292	611169	23	559	24.3043	58.136	2.74483	0.127435	0.564317	0.436883	0.0500381	hyper
20	4178303	4178951	25315531	25315553	965198	23	649	28.2174	-58.1088	-1.90456	-0.11213	0.645442	0.757572	0.0455142	hypo
2	52172794	52173702	2488306	2488326	885501	21	909	43.2857	-58.0928	-1.93575	-0.129697	0.383479	0.513175	0.0449264	hypo
13	13217850	13218610	17802940	17802958	416092	19	761	40.0526	58.0916	3.91051	0.136904	0.759989	0.623084	0.0454075	hyper
16	32885828	32886392	21556163	21556184	642468	22	565	25.6818	-58.0575	-1.91906	-0.119243	0.578429	0.697671	0.0500865	hypo
X	113238382	113239066	34412415	34412436	2245659	22	685	31.1364	58.0425	3.15199	0.139114	0.711264	0.572151	0.0424617	hyper
13	39337673	39338708	18189257	18189280	437162	24	1036	43.1667	58.036	2.66396	0.115495	0.703589	0.588094	0.046438	hyper
2	121338550	121339485	3282106	3282129	952711	24	936	39	58.0126	2.58272	0.151397	0.74237	0.590973	0.0477684	hyper
18	47654452	47654810	23965045	23965069	777892	25	359	14.36	-58.0069	-1.82928	-0.1181	0.452437	0.570537	0.0547754	hypo
18	28912897	28914038	23711594	23711616	761953	23	1142	49.6522	58.0038	2.81157	0.125025	0.666296	0.54127	0.0476942	hyper
16	33038771	33039124	21558461	21558486	642584	26	354	13.6154	57.9949	2.36709	0.119334	0.726057	0.606724	0.0525866	hyper
26	9848754	9849719	30631458	30631480	1257784	23	966	42	-57.988	-1.8762	-0.116499	0.550801	0.6673	0.0459981	hypo
2	81204844	81205163	2792270	2792289	915136	20	320	16	-57.9714	-2.24796	-0.103861	0.525471	0.629332	0.0445374	hypo
11	22666967	22667746	15357720	15357742	258150	23	780	33.913	57.9573	2.56125	0.160579	0.805379	0.6448	0.0458529	hyper
24	61077970	61078433	29810558	29810581	1218956	24	464	19.3333	57.9554	2.67963	0.183661	0.636246	0.452585	0.0654746	hyper
18	48305205	48306095	23974815	23974836	778358	22	891	40.5	-57.9553	-2.03402	-0.142735	0.419646	0.562381	0.0532988	hypo
19	56688865	56689443	25103311	25103333	831282	23	579	25.1739	57.9548	2.70296	0.114265	0.827096	0.712831	0.0506209	hyper
21	12884914	12885551	26363352	26363376	1037177	25	638	25.52	-57.9355	-1.92623	-0.120996	0.529933	0.65093	0.0548675	hypo
8	72942073	72942673	11766762	11766784	2009801	23	601	26.1304	-57.9315	-1.89431	-0.104746	0.704833	0.809579	0.0451711	hypo
14	76748214	76748803	19949849	19949876	533960	28	590	21.0714	-57.9245	-1.87894	-0.105043	0.653391	0.758434	0.0489227	hypo
3	27592988	27593634	3885167	3885192	1429182	26	647	24.8846	57.9176	2.55855	0.108896	0.783749	0.674853	0.0444944	hyper
2	128491848	128492406	3392267	3392288	957788	22	559	25.4091	-57.908	-2.11833	-0.161561	0.532725	0.694286	0.0509932	hypo
17	19098979	19099765	22526927	22526946	696373	20	787	39.35	-57.8871	-2.33198	-0.156399	0.438895	0.595294	0.0470941	hypo
10	1105082	1105753	13676881	13676899	151642	19	672	35.3684	-57.8508	-2.15054	-0.127215	0.598325	0.72554	0.0442358	hypo
16	38868382	38869030	21627544	21627567	648316	24	649	27.0417	57.8273	2.98457	0.103973	0.597005	0.493031	0.0450854	hyper
17	64051145	64051641	23100899	23100920	736099	22	497	22.5909	57.8146	2.93407	0.134759	0.797799	0.663039	0.0478071	hyper
7	109049206	109049654	10858935	10858963	1940062	29	449	15.4828	-57.775	-1.82654	-0.12419	0.62617	0.75036	0.0491119	hypo
18	4124420	4124862	23316371	23316388	744225	18	443	24.6111	-57.7662	-2.76156	-0.142974	0.26364	0.406614	0.0503865	hypo
3	21394784	21396056	3802516	3802540	1423736	25	1273	50.92	-57.749	-1.91817	-0.101845	0.401762	0.503606	0.0476541	hypo
28	4490101	4491051	32029309	32029330	1329077	22	951	43.2273	57.726	2.95584	0.197542	0.550891	0.353349	0.057727	hyper
16	1376203	1376508	21167430	21167450	613514	21	306	14.5714	57.7029	3.25441	0.160667	0.750502	0.589835	0.054334	hyper
10	94720908	94721221	14886604	14886626	233426	23	314	13.6522	57.6995	2.99394	0.118653	0.748525	0.629872	0.0501086	hyper
14	69111308	69112048	19843714	19843734	527195	21	741	35.2857	-57.6906	-1.8738	-0.114586	0.483378	0.597964	0.0611788	hypo
23	51304317	51304701	28862745	28862774	1169467	30	385	12.8333	57.6842	1.99477	0.111489	0.507269	0.39578	0.0597343	hyper
2	1316727	1317584	1889326	1889350	835750	25	858	34.32	-57.6819	-1.85378	-0.121239	0.509465	0.630704	0.0534962	hypo
7	31313491	31314331	9895688	9895708	1868115	21	841	40.0476	-57.6678	-1.85242	-0.143804	0.616674	0.760478	0.0476688	hypo
6	116610172	116610462	9469013	9469041	1841952	29	291	10.0345	-57.6603	-1.83673	-0.118473	0.330237	0.448711	0.0604381	hypo
12	12441150	12441851	16602206	16602227	341944	22	702	31.9091	-57.6599	-1.83758	-0.165798	0.551043	0.716842	0.0618942	hypo
25	32414811	32415514	30351491	30351509	1242238	19	704	37.0526	-57.6519	-1.92271	-0.173714	0.532444	0.706157	0.0588638	hypo
17	4094077	4094467	22300970	22300993	684392	24	391	16.2917	57.6458	2.63698	0.124768	0.748792	0.624024	0.0540422	hyper
2	32719952	32720637	2269975	2269992	865885	18	686	38.1111	-57.634	-1.9465	-0.171888	0.609821	0.781709	0.0492806	hypo
22	47612478	47613240	27852752	27852772	1122602	21	763	36.3333	57.6166	3.04189	0.159746	0.693625	0.533879	0.0479733	hyper
16	65656997	65657351	21998549	21998575	669603	27	355	13.1481	-57.6151	-1.87526	-0.123706	0.58905	0.712756	0.0591704	hypo
7	108357272	108358019	10845151	10845167	1939603	17	748	44	57.6132	4.1207	0.2371	0.807541	0.570441	0.057279	hyper
X	97289081	97289752	34229592	34229611	2230223	20	672	33.6	-57.6044	-2.63395	-0.108796	0.680839	0.789635	0.0440201	hypo
9	19892613	19893478	12553743	12553766	2063039	24	866	36.0833	57.6022	2.69166	0.119755	0.917487	0.797732	0.0442794	hyper
11	6424683	6425054	15137969	15137994	243980	26	372	14.3077	-57.5989	-1.86474	-0.122682	0.378745	0.501427	0.0599811	hypo
2	8396433	8397644	1972062	1972086	842444	25	1212	48.48	-57.5961	-1.90939	-0.127965	0.487801	0.615766	0.0498898	hypo
19	21934150	21934859	24560873	24560896	807230	24	710	29.5833	-57.563	-1.9771	-0.133434	0.437741	0.571175	0.0569362	hypo
12	82750694	82751267	17523643	17523663	402696	21	574	27.3333	57.5369	3.15768	0.125066	0.841256	0.716189	0.0453282	hyper
18	12682748	12683229	23480892	23480920	749115	29	482	16.6207	57.5059	2.06909	0.117913	0.684031	0.566119	0.0624282	hyper
29	9000489	9000837	32715599	32715622	1372406	24	349	14.5417	57.497	2.67235	0.223333	0.725623	0.50229	0.0688129	hyper
17	53138964	53139664	22920215	22920238	728628	24	701	29.2083	57.4764	2.6462	0.15665	0.808581	0.651931	0.0495123	hyper
7	96017407	96018631	10676805	10676826	1928629	22	1225	55.6818	-57.4667	-1.89879	-0.141481	0.586798	0.728279	0.0515968	hypo
10	17957913	17958944	13923167	13923189	165059	23	1032	44.8696	-57.4486	-1.8432	-0.103578	0.37243	0.476008	0.049212	hypo
17	11810948	11811537	22416407	22416420	690516	14	590	42.1429	57.4463	4.44553	0.269953	0.746792	0.476839	0.0628215	hyper
1	54461288	54462100	583253	583271	54946	19	813	42.7895	-57.4415	-2.38007	-0.205908	0.428537	0.634445	0.0571898	hypo
12	29930575	29931023	16874993	16875016	355475	24	449	18.7083	57.4217	2.50987	0.131978	0.785644	0.653666	0.0459987	hyper
16	42017923	42018293	21667403	21667426	651137	24	371	15.4583	-57.4187	-1.89822	-0.10464	0.765581	0.870221	0.0446154	hypo
29	42497662	42498481	33174558	33174580	1400179	23	820	35.6522	57.3984	3.18429	0.136551	0.3727	0.236149	0.0566981	hyper
9	99510678	99511295	13564355	13564366	2137311	12	618	51.5	-57.3844	-2.611	-0.316269	0.448186	0.764456	0.0549536	hypo
25	3291042	3291331	29883448	29883464	1221681	17	290	17.0588	57.3786	3.83355	0.151183	0.621154	0.469971	0.0477604	hyper
1	148642176	148642663	1696510	1696529	144661	20	488	24.4	57.3698	3.41531	0.121807	0.840862	0.719055	0.0439277	hyper
18	43401576	43401900	23909566	23909586	774304	21	325	15.4762	57.3405	3.64614	0.175505	0.496517	0.321012	0.054456	hyper
15	47587952	47588692	20639068	20639092	580856	25	741	29.64	-57.3228	-2.06659	-0.106507	0.654599	0.761106	0.0459779	hypo
19	14273199	14273571	24437340	24437357	802012	18	373	20.7222	57.3153	3.50188	0.174842	0.760264	0.585422	0.0541247	hyper
27	39921266	39922048	31865730	31865753	1321485	24	783	32.625	57.3141	2.94759	0.199623	0.833698	0.634075	0.0701739	hyper
16	20596934	20597337	21384729	21384753	631956	25	404	16.16	-57.3067	-1.98329	-0.11492	0.34658	0.4615	0.0495083	hypo
22	41916428	41917347	27768646	27768669	1117972	24	920	38.3333	-57.2993	-1.91224	-0.110992	0.567141	0.678134	0.0482448	hypo
12	14750101	14750613	16642304	16642325	343490	22	513	23.3182	-57.2906	-2.50669	-0.128053	0.727277	0.85533	0.0495716	hypo
14	4253820	4254227	18962281	18962303	470772	23	408	17.7391	57.2837	2.86259	0.110422	0.618374	0.507952	0.046347	hyper
21	69797091	69797545	27163439	27163454	1083209	16	455	28.4375	57.281	4.29142	0.152172	0.725148	0.572976	0.0473658	hyper
6	66823290	66824051	8842909	8842931	1797395	23	762	33.1304	-57.2668	-1.87249	-0.121609	0.467052	0.588661	0.0495352	hypo
13	73659484	73659935	18698283	18698296	462897	14	452	32.2857	57.2594	4.9184	0.202214	0.670712	0.468499	0.0499756	hyper
3	28754724	28755044	3900295	3900316	1430189	22	321	14.5909	57.2557	3.43248	0.110254	0.618199	0.507945	0.0436714	hyper
14	74950147	74950759	19924377	19924394	532394	18	613	34.0556	-57.2476	-1.96326	-0.132969	0.54726	0.680229	0.0481208	hypo
18	4769582	4770489	23327131	23327156	744677	26	908	34.9231	57.243	2.39205	0.123432	0.727551	0.604119	0.0483199	hyper
7	80600790	80601902	10483547	10483568	1914046	22	1113	50.5909	57.2426	2.72096	0.175906	0.94326	0.767355	0.046754	hyper
28	4279524	4280135	32026391	32026414	1328894	24	612	25.5	57.2414	2.54415	0.161934	0.769058	0.607124	0.0481914	hyper
3	41992268	41993121	4049549	4049568	1443144	20	854	42.7	-57.2093	-1.94836	-0.119511	0.558342	0.677853	0.0453776	hypo
23	24510423	24510997	28424474	28424498	1150504	25	575	23	57.2037	2.55038	0.13398	0.670109	0.536129	0.0551774	hyper
11	9784601	9784927	15192507	15192527	246377	21	327	15.5714	-57.1955	-1.93235	-0.162406	0.542778	0.705183	0.0510865	hypo
X	37607179	37607655	33647530	33647550	2169554	21	477	22.7143	-57.1846	-1.84408	-0.114597	0.647519	0.762115	0.04144	hypo
13	15905057	15905301	17838517	17838536	418546	20	245	12.25	-57.1824	-2.55114	-0.150011	0.513882	0.663892	0.0465729	hypo
21	30520650	30521712	26628543	26628563	1050317	21	1063	50.619	-57.1791	-1.85799	-0.116386	0.408301	0.524688	0.0492955	hypo
28	44575712	44576066	32569567	32569592	1363769	26	355	13.6538	57.1765	2.37214	0.1051	0.566297	0.461196	0.0539746	hyper
17	53025927	53026643	22918027	22918050	728541	24	717	29.875	-57.1675	-2.09526	-0.116427	0.360274	0.476702	0.0532115	hypo
17	62965653	62966368	23079917	23079938	735491	22	716	32.5455	57.1531	2.89967	0.123636	0.602543	0.478907	0.0473308	hyper
29	49339692	49339986	33287393	33287407	1404124	15	295	19.6667	57.1175	4.01177	0.22578	0.716421	0.490641	0.0550183	hyper
14	61652746	61653571	19730699	19730726	521316	28	826	29.5	57.1056	2.13596	0.122709	0.583441	0.460733	0.0533456	hyper
26	9758137	9758866	30630039	30630051	1257714	13	730	56.1538	57.0737	5.92984	0.200659	0.739477	0.538819	0.046019	hyper
27	35411997	35412613	31776473	31776490	1318957	18	617	34.2778	57.049	3.68363	0.211302	0.671934	0.460632	0.0507325	hyper
X	95781325	95781995	34216030	34216053	2228626	24	671	27.9583	57.0423	2.59359	0.111714	0.389418	0.277704	0.0480323	hyper
6	68673321	68674096	8868941	8868962	1798989	22	776	35.2727	-57.0411	-2.13404	-0.109756	0.613415	0.723172	0.0502214	hypo
24	57250093	57250832	29727079	29727101	1216883	23	740	32.1739	57.0314	3.85768	0.131653	0.812436	0.680783	0.0485019	hyper
8	16962720	16963619	11108496	11108515	1956145	20	900	45	-57.0297	-1.84294	-0.205461	0.479963	0.685424	0.0495572	hypo
20	3457203	3458049	25302724	25302749	964742	26	847	32.5769	-56.976	-1.82875	-0.118513	0.388246	0.506758	0.0480733	hypo
12	32138706	32138884	16914791	16914812	356824	22	179	8.13636	-56.9579	-2.02098	-0.104497	0.668579	0.773076	0.0463384	hypo
4	62849838	62850124	5781263	5781279	1575396	17	287	16.8824	-56.9562	-2.1275	-0.160306	0.533563	0.693869	0.0460045	hypo
5	71101296	71102072	7420560	7420580	1691215	21	777	37	56.947	3.01481	0.162085	0.666248	0.504163	0.046749	hyper
8	96782222	96782702	12057733	12057755	2032028	23	481	20.913	56.9369	2.63069	0.127213	0.727669	0.600456	0.0454369	hyper
27	35185911	35186364	31772876	31772893	1318786	18	454	25.2222	-56.9081	-2.33572	-0.124483	0.421246	0.545729	0.0465944	hypo
X	132299664	132300490	34641554	34641577	2263610	24	827	34.4583	56.907	2.72875	0.121793	0.538702	0.416909	0.0469607	hyper
18	21917454	21917973	23613054	23613073	756192	20	520	26	-56.885	-1.86694	-0.14687	0.591889	0.738759	0.0480192	hypo
17	68645792	68646242	23188825	23188846	738669	22	451	20.5	-56.8623	-2.03578	-0.102451	0.53049	0.632941	0.0485226	hypo
24	57513798	57514415	29733253	29733275	1216991	23	618	26.8696	56.8585	2.95028	0.128058	0.770036	0.641978	0.0515289	hyper
11	47694473	47694962	15660699	15660716	281345	18	490	27.2222	56.8556	3.41477	0.16235	0.612965	0.450615	0.0537214	hyper
16	79155032	79155496	22228176	22228201	679308	26	465	17.8846	56.8544	2.34506	0.109366	0.687677	0.578311	0.0500041	hyper
X	135224953	135225266	34701079	34701098	2265027	20	314	15.7	-56.8527	-2.21387	-0.108237	0.469771	0.578007	0.0408672	hypo
9	54757185	54757645	12962573	12962592	2097364	20	461	23.05	-56.852	-2.60127	-0.170149	0.597161	0.76731	0.0467655	hypo
24	34332995	34333500	29352511	29352528	1200274	18	506	28.1111	56.8515	3.41575	0.154185	0.69678	0.542595	0.0456633	hyper
15	77751539	77752447	21033584	21033609	607088	26	909	34.9615	56.8512	3.36928	0.112072	0.663922	0.55185	0.0493715	hyper
10	13200755	13201454	13851184	13851204	161521	21	700	33.3333	-56.846	-1.87559	-0.119821	0.50068	0.620502	0.048453	hypo
18	23442651	23443573	23639608	23639629	757157	22	923	41.9545	-56.8192	-2.22374	-0.128206	0.604464	0.732669	0.0491418	hypo
19	4529617	4529891	24286818	24286830	794399	13	275	21.1538	-56.7934	-4.12745	-0.24225	0.457493	0.699744	0.0460403	hypo
23	28711113	28712438	28470153	28470177	1153560	25	1326	53.04	-56.7777	-1.91462	-0.141333	0.614041	0.755374	0.0609819	hypo
13	72906142	72907619	18685665	18685692	462419	28	1478	52.7857	56.7653	2.37438	0.110313	0.771428	0.661115	0.0442323	hyper
2	102185071	102185528	3032751	3032770	935912	20	458	22.9	-56.7591	-2.01905	-0.11358	0.525187	0.638767	0.0535155	hypo
24	35566028	35566668	29371602	29371622	1201228	21	641	30.5238	56.7537	3.21467	0.12598	0.834475	0.708496	0.0460102	hyper
10	16664437	16664876	13904178	13904201	164099	24	440	18.3333	-56.7478	-1.98982	-0.16207	0.604155	0.766226	0.0587168	hypo
10	85491668	85492458	14746595	14746608	226369	14	791	56.5	-56.717	-3.21066	-0.193964	0.632774	0.826738	0.0475345	hypo
9	97448676	97449463	13525559	13525580	2135954	22	788	35.8182	56.6805	3.09011	0.125771	0.742404	0.616633	0.0452451	hyper
12	83117274	83117942	17531618	17531642	402899	25	669	26.76	-56.6673	-1.92227	-0.109365	0.574461	0.683825	0.0472249	hypo
4	10287696	10288481	5166694	5166715	1523422	22	786	35.7273	-56.6625	-2.12283	-0.106326	0.560987	0.667312	0.0446784	hypo
25	24821122	24821692	30226213	30226238	1237012	26	571	21.9615	56.6526	2.33631	0.128036	0.85601	0.727974	0.0504013	hyper
3	118911622	118911998	5013157	5013174	1513295	18	377	20.9444	-56.6503	-1.94316	-0.137009	0.719227	0.856235	0.0442651	hypo
20	67428056	67428588	26114262	26114290	1023350	29	533	18.3793	56.6456	2.07621	0.111645	0.727632	0.615988	0.0486913	hyper
20	725282	726114	25258108	25258127	962774	20	833	41.65	-56.6445	-1.84854	-0.145034	0.334866	0.4799	0.0487824	hypo
3	112243277	112243805	4886982	4887005	1509467	24	529	22.0417	56.6358	2.62734	0.197293	0.786411	0.589118	0.0725594	hyper
5	1937891	1938567	6588278	6588302	1625731	25	677	27.08	-56.6273	-2.04704	-0.104073	0.492803	0.596876	0.0492868	hypo
5	116673954	116674309	8044161	8044179	1729058	19	356	18.7368	56.6248	3.44126	0.18724	0.590906	0.403666	0.0512388	hyper
13	76962758	76963519	18755885	18755911	464958	27	762	28.2222	56.6042	2.67923	0.162365	0.704605	0.54224	0.0617901	hyper
14	67934483	67934847	19827148	19827166	526188	19	365	19.2105	56.5817	3.90977	0.158229	0.684715	0.526486	0.0503925	hyper
11	88163776	88164467	16168686	16168703	317750	18	692	38.4444	-56.5794	-2.54376	-0.121317	0.300832	0.422149	0.0496389	hypo
28	35806293	35806666	32443713	32443732	1356566	20	374	18.7	-56.5763	-2.34952	-0.118177	0.464328	0.582506	0.0480917	hypo
X	113855338	113856176	34418928	34418948	2246280	21	839	39.9524	56.5648	3.05457	0.153732	0.661174	0.507442	0.0455033	hyper
X	137592117	137593064	34752409	34752431	2266114	23	948	41.2174	-56.5439	-1.83777	-0.122091	0.509858	0.631949	0.059529	hypo
1	142698366	142699394	1604997	1605017	140555	21	1029	49	56.5178	3.12608	0.14694	0.677068	0.530128	0.0490055	hyper
18	55388594	55389173	24090164	24090183	782714	20	580	29	56.4945	3.4406	0.13374	0.70508	0.57134	0.0510245	hyper
8	109857956	109858506	12264221	12264233	2041879	13	551	42.3846	-56.4892	-2.39357	-0.24287	0.314018	0.556888	0.0524349	hypo
12	20249264	20249898	16728714	16728732	347748	19	635	33.4211	56.459	4.11134	0.190875	0.563892	0.373016	0.0588973	hyper
1	134382510	134383649	1500940	1500961	133124	22	1140	51.8182	56.4494	3.04045	0.110288	0.78702	0.676732	0.0460086	hyper
19	61137207	61137787	25196693	25196719	833487	27	581	21.5185	56.4252	2.28099	0.146965	0.761494	0.61453	0.0567462	hyper
23	49955674	49956187	28831940	28831956	1168783	17	514	30.2353	-56.4116	-2.40634	-0.156478	0.472373	0.628851	0.0478768	hypo
1	142707615	142708005	1605151	1605172	140560	22	391	17.7727	-56.402	-1.82749	-0.10487	0.331059	0.435929	0.0462747	hypo
5	73204646	73205871	7448685	7448704	1692946	20	1226	61.3	-56.4017	-1.85283	-0.203017	0.473901	0.676918	0.0649458	hypo
26	14498687	14499080	30693709	30693722	1261910	14	394	28.1429	56.3697	4.22893	0.234883	0.823937	0.589054	0.0491356	hyper
12	78961897	78962302	17458110	17458131	399966	22	406	18.4545	-56.3497	-1.96455	-0.133716	0.173513	0.307229	0.0519972	hypo
19	28383787	28384098	24662524	24662540	811640	17	312	18.3529	-56.3487	-2.1459	-0.148975	0.614435	0.76341	0.0523193	hypo
15	76432156	76432649	21007822	21007845	606286	24	494	20.5833	-56.3246	-1.92784	-0.132735	0.669277	0.802012	0.0522829	hypo
13	77839831	77840260	18773903	18773925	465412	23	430	18.6957	-56.3152	-1.83021	-0.104972	0.530417	0.635389	0.0478506	hypo
19	58641068	58641550	25140685	25140709	832260	25	483	19.32	56.3152	2.5758	0.154527	0.614318	0.459791	0.0699959	hyper
14	10424132	10424711	19064699	19064721	474948	23	580	25.2174	56.3122	2.78512	0.149834	0.586233	0.436398	0.0556059	hyper
11	10322219	10322723	15199919	15199944	246829	26	505	19.4231	56.2924	2.34179	0.109086	0.442731	0.333645	0.0483976	hyper
9	36094336	36094855	12748475	12748492	2078717	18	520	28.8889	-56.2923	-2.71528	-0.170146	0.405989	0.576135	0.0517926	hypo
21	1452901	1453578	26212828	26212851	1027093	24	678	28.25	56.2461	2.784	0.109502	0.644696	0.535194	0.0464233	hyper
X	52051735	52052170	33784302	33784319	2184172	18	436	24.2222	-56.2401	-2.38039	-0.127989	0.250065	0.378054	0.0470599	hypo
2	89871577	89872335	2885780	2885794	923911	15	759	50.6	56.24	4.35518	0.186333	0.615667	0.429335	0.046479	hyper
11	40352689	40353499	15564511	15564536	274947	26	811	31.1923	-56.2364	-1.99928	-0.133299	0.49357	0.626869	0.0511036	hypo
3	119630951	119631403	5021032	5021047	1513767	16	453	28.3125	56.2358	3.78956	0.143694	0.698884	0.555191	0.0493528	hyper
2	39426486	39427370	2349465	2349484	872505	20	885	44.25	56.2336	3.15466	0.131269	0.83817	0.7069	0.0467326	hyper
4	118050975	118051491	6525481	6525502	1622930	22	517	23.5	56.2311	3.086	0.129128	0.792073	0.662945	0.0502003	hyper
10	87957104	87958193	14786940	14786961	228057	22	1090	49.5455	56.2102	3.08193	0.118104	0.775067	0.656962	0.0493228	hyper
23	42710948	42711438	28681120	28681139	1164768	20	491	24.55	-56.1995	-1.89542	-0.130102	0.574514	0.704615	0.0530933	hypo
13	46037428	46038177	18296490	18296508	441841	19	750	39.4737	-56.1819	-1.98483	-0.123763	0.558498	0.682261	0.049121	hypo
6	22381137	22382064	8358798	8358820	1752708	23	928	40.3478	-56.178	-1.82711	-0.103091	0.360799	0.463891	0.0481927	hypo
16	2202358	2202733	21180367	21180387	614115	21	376	17.9048	-56.1676	-2.43365	-0.111557	0.431175	0.542732	0.0551382	hypo
11	437751	438650	15033295	15033314	240175	20	900	45	56.1469	3.27159	0.155869	0.785286	0.629417	0.0505437	hyper
10	746741	748280	13670453	13670478	151411	26	1540	59.2308	56.1042	2.52697	0.12126	0.567752	0.446492	0.0521664	hyper
16	60816877	60817137	21926577	21926595	665752	19	261	13.7368	-56.1041	-2.03027	-0.133571	0.34115	0.474721	0.04531	hypo
27	26323458	26324459	31635302	31635316	1312027	15	1002	66.8	-56.0616	-1.89327	-0.228259	0.513751	0.74201	0.0487147	hypo
12	41876793	41877527	17039034	17039052	365404	19	735	38.6842	-56.0548	-2.28058	-0.146368	0.536888	0.683256	0.0501369	hypo
29	47293889	47294489	33253957	33253978	1403015	22	601	27.3182	56.0537	3.17765	0.120922	0.613695	0.492774	0.0484621	hyper
16	4565439	4565968	21221505	21221520	615594	16	530	33.125	56.0423	4.32807	0.174458	0.649478	0.47502	0.0518662	hyper
9	80316861	80317411	13260436	13260464	2122597	29	551	19	56.0205	2.0452	0.13558	0.40732	0.27174	0.0666675	hyper
14	10186270	10186746	19060144	19060161	474808	18	477	26.5	-56.0184	-2.20909	-0.158201	0.452693	0.610894	0.0518854	hypo
7	5941418	5941860	9567116	9567131	1846977	16	443	27.6875	-56.0181	-1.96646	-0.181174	0.373507	0.554681	0.050746	hypo
7	18176489	18176849	9725835	9725860	1856656	26	361	13.8846	56.0122	2.5081	0.112463	0.651362	0.538899	0.0467135	hyper
26	33564262	33564683	30943481	30943505	1278403	25	422	16.88	-55.9904	-2.01241	-0.132258	0.610567	0.742825	0.0518525	hypo
6	69063610	69064217	8874035	8874058	1799357	24	608	25.3333	-55.9861	-2.20778	-0.101851	0.453945	0.555797	0.045265	hypo
2	93453477	93454477	2930105	2930131	927329	27	1001	37.0741	55.9603	2.75753	0.15883	0.689789	0.530959	0.0493843	hyper
22	2273031	2273721	27193764	27193784	1085265	21	691	32.9048	-55.9483	-1.82983	-0.119286	0.593741	0.713028	0.0484543	hypo
5	116389051	116389722	8039183	8039210	1728907	28	672	24	55.9368	2.19744	0.102568	0.795691	0.693123	0.0626405	hyper
25	3721082	3721600	29890026	29890048	1221940	23	519	22.5652	-55.9298	-2.04574	-0.111529	0.416186	0.527715	0.0512859	hypo
15	22054492	22054882	20280119	20280142	560189	24	391	16.2917	55.9236	2.79426	0.130904	0.500356	0.369452	0.0537986	hyper
1	71081534	71082093	777141	777153	71124	13	560	43.0769	55.9202	4.40285	0.221706	0.889682	0.667976	0.046676	hyper
29	40924571	40925432	33153070	33153092	1398959	23	862	37.4783	55.8979	2.83131	0.136261	0.706172	0.569911	0.0482385	hyper
27	26571364	26571722	31640269	31640297	1312166	29	359	12.3793	55.8972	2.00973	0.107635	0.752736	0.645101	0.0509169	hyper
11	4614613	4615076	15104809	15104823	242932	15	464	30.9333	-55.8924	-2.85065	-0.174036	0.375009	0.549045	0.0470519	hypo
25	13100339	13100786	30051901	30051926	1227895	26	448	17.2308	-55.8711	-1.88331	-0.100901	0.490907	0.591808	0.0534984	hypo
18	5405761	5406625	23340920	23340940	744978	21	865	41.1905	-55.8501	-1.8694	-0.121255	0.415924	0.537179	0.0563367	hypo
7	29646670	29647393	9874822	9874840	1866555	19	724	38.1053	55.8426	3.08179	0.192571	0.679192	0.486621	0.053388	hyper
26	24134504	24135138	30825942	30825965	1269912	24	635	26.4583	55.8191	2.82668	0.185625	0.642763	0.457138	0.0734763	hyper
10	67812970	67813455	14505529	14505556	210967	28	486	17.3571	55.819	2.10058	0.105125	0.879072	0.773947	0.0509394	hyper
13	59090398	59090867	18471595	18471614	452558	20	470	23.5	-55.7894	-1.90087	-0.114373	0.445922	0.560295	0.0510309	hypo
22	7465939	7466686	27279227	27279243	1088991	17	748	44	55.7854	4.94697	0.24378	0.856201	0.612421	0.0561898	hyper
14	19972303	19972843	19204144	19204169	482740	26	541	20.8077	-55.7691	-1.83756	-0.100002	0.554326	0.654328	0.0461562	hypo
23	27499421	27500375	28454410	28454427	1152695	18	955	53.0556	-55.76	-2.33132	-0.173397	0.690144	0.863541	0.0510846	hypo
1	25998241	25998773	303463	303478	24919	16	533	33.3125	-55.76	-3.18366	-0.112278	0.597705	0.709983	0.0483502	hypo
7	106512141	106512629	10809224	10809241	1938383	18	489	27.1667	-55.7533	-2.07552	-0.144178	0.537318	0.681496	0.0511183	hypo
9	78874523	78875132	13243918	13243934	2121168	17	610	35.8824	55.7508	3.72258	0.154177	0.767291	0.613114	0.0454339	hyper
25	10460725	10461220	30009584	30009609	1226044	26	496	19.0769	-55.7368	-1.82732	-0.165462	0.342561	0.508023	0.0773468	hypo
17	60045744	60046743	23030494	23030514	733556	21	1000	47.619	-55.7323	-1.98179	-0.147288	0.498777	0.646065	0.0484556	hypo
6	69037872	69038872	8873627	8873651	1799338	25	1001	40.04	-55.7282	-1.82854	-0.130249	0.686362	0.816611	0.0499596	hypo
18	22162040	22162646	23617080	23617103	756370	24	607	25.2917	-55.7282	-2.03905	-0.106697	0.539332	0.646028	0.0471102	hypo
8	105820112	105820722	12199603	12199625	2038892	23	611	26.5652	-55.6946	-1.89557	-0.105557	0.531095	0.636652	0.0466049	hypo
11	9181720	9182419	15184067	15184087	245879	21	700	33.3333	-55.6873	-1.92017	-0.156234	0.57323	0.729464	0.0524767	hypo
17	17072514	17073159	22494738	22494758	694878	21	646	30.7619	-55.6779	-1.86823	-0.130817	0.748738	0.879555	0.0505763	hypo
4	103104425	103104945	6290337	6290356	1612083	20	521	26.05	55.6777	3.07473	0.158259	0.627567	0.469308	0.0551167	hyper
10	21396430	21396661	13968729	13968744	167741	16	232	14.5	-55.6762	-2.45136	-0.155475	0.613285	0.76876	0.0500722	hypo
16	80257870	80258271	22246894	22246918	679849	25	402	16.08	55.6756	2.47434	0.164541	0.675868	0.511327	0.0706616	hyper
23	33572440	33573419	28536629	28536650	1157786	22	980	44.5455	-55.6664	-2.28743	-0.1269	0.473551	0.600451	0.0532544	hypo
28	16147828	16148237	32187581	32187593	1339147	13	410	31.5385	-55.6606	-3.77496	-0.228812	0.503575	0.732387	0.0504947	hypo
16	41507464	41508381	21659767	21659792	650784	26	918	35.3077	-55.6561	-1.84476	-0.111638	0.331782	0.44342	0.0486387	hypo
7	4691680	4692047	9547942	9547958	1846183	17	368	21.6471	55.6392	3.46954	0.165983	0.79926	0.633277	0.0486975	hyper
10	2927494	2928524	13700204	13700219	153249	16	1031	64.4375	55.6189	3.83938	0.168361	0.657375	0.489014	0.0461021	hyper
7	1669833	1670501	9504666	9504690	1844013	25	669	26.76	-55.6163	-1.93402	-0.13836	0.49611	0.63447	0.0657834	hypo
3	119852834	119853390	5024110	5024132	1513895	23	557	24.2174	55.6019	2.62242	0.100435	0.617593	0.517157	0.0444449	hyper
12	75719843	75720230	17397613	17397636	397940	24	388	16.1667	-55.6008	-1.83265	-0.139586	0.632582	0.772168	0.0547024	hypo
21	60389387	60390215	26999249	26999271	1077725	23	829	36.0435	-55.5752	-1.84267	-0.116935	0.445639	0.562574	0.0542487	hypo
29	37533515	37533803	33112312	33112334	1396009	23	289	12.5652	55.5624	2.99596	0.129466	0.607757	0.478291	0.0543488	hyper
4	58653203	58654060	5731022	5731045	1571415	24	858	35.75	-55.555	-1.83555	-0.114811	0.451944	0.566755	0.0551074	hypo
17	31712347	31713335	22647108	22647124	709586	17	989	58.1765	-55.5488	-2.93818	-0.166422	0.372208	0.538631	0.0512566	hypo
17	42095484	42096287	22755400	22755425	720159	26	804	30.9231	55.5428	2.22581	0.110314	0.565418	0.455103	0.0456989	hyper
13	71371071	71372238	18660313	18660338	461439	26	1168	44.9231	55.5379	2.46296	0.121965	0.762761	0.640796	0.0470719	hyper
17	12841282	12842096	22435417	22435436	691176	20	815	40.75	-55.5325	-1.85872	-0.105394	0.462425	0.567818	0.0464516	hypo
1	153440278	153440828	1783045	1783064	147712	20	551	27.55	55.5229	3.14707	0.114126	0.759636	0.64551	0.0456811	hyper
18	63202792	63203389	24203833	24203857	787983	25	598	23.92	55.5228	2.5064	0.129831	0.281425	0.151594	0.0552455	hyper
12	47487624	47488879	17088991	17089015	371518	25	1256	50.24	-55.5104	-1.8363	-0.106338	0.778315	0.884653	0.045206	hypo
21	38473154	38473747	26726434	26726457	1057356	24	594	24.75	55.507	2.50111	0.131523	0.717797	0.586274	0.0468541	hyper
4	55559430	55559880	5697431	5697447	1568204	17	451	26.5294	-55.497	-1.85084	-0.140537	0.360502	0.501039	0.0493871	hypo
22	12815967	12816562	27361231	27361254	1093039	24	596	24.8333	55.469	2.40632	0.115287	0.666093	0.550805	0.0464742	hyper
9	81885774	81886474	13283754	13283771	2123926	18	701	38.9444	-55.4564	-2.13447	-0.19789	0.650016	0.847906	0.0519081	hypo
15	77756193	77756616	21033713	21033734	607090	22	424	19.2727	-55.4228	-1.88282	-0.133882	0.512443	0.646326	0.0562026	hypo
5	100099740	100100530	7771753	7771782	1718197	30	791	26.3667	55.4223	1.93477	0.100392	0.328478	0.228086	0.0506839	hyper
1	73520485	73521204	810004	810028	73227	25	720	28.8	-55.4204	-1.86847	-0.117364	0.566875	0.684239	0.0561238	hypo
19	59869923	59870845	25169188	25169212	832851	25	923	36.92	55.4156	2.70891	0.12569	0.817116	0.691426	0.0466809	hyper
10	13671828	13672035	13858916	13858931	161838	16	208	13	-55.3906	-2.47502	-0.178621	0.647273	0.825894	0.0566815	hypo
16	6393624	6394495	21240169	21240190	617400	22	872	39.6364	-55.3891	-1.97471	-0.104767	0.584103	0.68887	0.0579237	hypo
9	94200740	94201296	13459192	13459212	2134165	21	557	26.5238	-55.3842	-2.02197	-0.105527	0.610273	0.7158	0.0521165	hypo
16	42614507	42615723	21676629	21676654	651555	26	1217	46.8077	55.3837	2.30662	0.104138	0.681885	0.577747	0.043975	hyper
9	97326436	97327188	13523087	13523105	2135883	19	753	39.6316	55.3824	3.41458	0.189255	0.783497	0.594241	0.0544683	hyper
27	16492188	16493153	31499082	31499103	1303367	22	966	43.9091	-55.3793	-2.15877	-0.102977	0.590812	0.693789	0.0497638	hypo
22	41193484	41194075	27756531	27756552	1117450	22	592	26.9091	55.3663	2.88393	0.126956	0.784096	0.65714	0.0489405	hyper
X	119438900	119439384	34482202	34482223	2251885	22	485	22.0455	-55.363	-2.06063	-0.100143	0.545547	0.64569	0.0414235	hypo
25	37551553	37551864	30440351	30440372	1245288	22	312	14.1818	-55.3519	-2.04089	-0.120087	0.442447	0.562534	0.0558511	hypo
9	53079244	53079684	12946663	12946681	2095579	19	441	23.2105	-55.3501	-2.38062	-0.102712	0.628994	0.731706	0.045159	hypo
1	143077733	143078176	1611814	1611837	140786	24	444	18.5	-55.311	-1.85697	-0.105194	0.542803	0.647997	0.0514983	hypo
29	439193	439946	32601497	32601515	1364939	19	754	39.6842	55.2989	3.64573	0.174584	0.635506	0.460922	0.0481831	hyper
12	22151117	22151498	16761425	16761445	348937	21	382	18.1905	-55.2987	-2.00361	-0.116913	0.545767	0.66268	0.0489649	hypo
24	47966277	47966573	29566575	29566595	1210494	21	297	14.1429	-55.2865	-2.24716	-0.116426	0.56128	0.677706	0.0577684	hypo
23	39183519	39184214	28614678	28614696	1162652	19	696	36.6316	-55.2819	-1.86933	-0.155219	0.538983	0.694201	0.0529505	hypo
17	7575621	7576389	22358560	22358584	686906	25	769	30.76	55.2685	2.39619	0.211422	0.771395	0.559973	0.0794815	hyper
3	23497198	23497956	3829545	3829563	1425713	19	759	39.9474	55.2649	3.41828	0.121237	0.754206	0.632969	0.0439914	hyper
14	38577654	38578291	19465581	19465600	498762	20	638	31.9	-55.2639	-2.32949	-0.13637	0.554624	0.690994	0.045711	hypo
8	74388262	74388993	11788089	11788103	2010999	15	732	48.8	55.2401	4.87639	0.187161	0.90632	0.719159	0.0486704	hyper
X	56242445	56243468	33826997	33827019	2188472	23	1024	44.5217	55.2225	2.71343	0.144414	0.626979	0.482566	0.0496885	hyper
24	41868713	41869165	29474536	29474554	1205852	19	453	23.8421	-55.2163	-2.069	-0.139321	0.613985	0.753306	0.0509001	hypo
15	33886251	33886992	20463190	20463206	568862	17	742	43.6471	55.204	3.94944	0.280711	0.644983	0.364273	0.0564913	hyper
12	31392440	31393232	16901933	16901958	356344	26	793	30.5	55.2024	2.45359	0.114267	0.575797	0.46153	0.048989	hyper
17	49562810	49563571	22860106	22860125	726259	20	762	38.1	55.2023	3.04085	0.245195	0.682756	0.437561	0.0639341	hyper
26	18480453	18481176	30748106	30748127	1265240	22	724	32.9091	55.1846	2.85146	0.137269	0.646834	0.509565	0.0494125	hyper
25	9810574	9810982	29997640	29997665	1225663	26	409	15.7308	55.1806	2.23804	0.105077	0.850004	0.744927	0.0515009	hyper
11	19020833	19021696	15308719	15308744	254892	26	864	33.2308	55.1627	2.39209	0.112636	0.629877	0.517241	0.0498904	hyper
12	81717025	81717654	17501913	17501933	402151	21	630	30	-55.1549	-2.09288	-0.106826	0.416271	0.523097	0.0478902	hypo
5	119691754	119692750	8094887	8094909	1730757	23	997	43.3478	55.1453	3.11066	0.124546	0.794764	0.670218	0.0478617	hyper
17	49281761	49282692	22855851	22855877	726037	27	932	34.5185	55.134	2.18423	0.137488	0.639806	0.502319	0.0506192	hyper
29	373788	374415	32599317	32599342	1364930	26	628	24.1538	55.1322	2.38016	0.108531	0.671451	0.56292	0.0481831	hyper
16	19197774	19198645	21364933	21364958	630753	26	872	33.5385	55.1066	2.71253	0.149472	0.770415	0.620943	0.0537836	hyper
26	14761132	14761931	30697817	30697838	1262105	22	800	36.3636	-55.0974	-1.9939	-0.118945	0.387213	0.506158	0.0531851	hypo
13	77109791	77110336	18758808	18758828	465038	21	546	26	-55.0913	-2.19932	-0.119931	0.428528	0.548458	0.0554464	hypo
4	62100472	62101168	5772312	5772330	1574719	19	697	36.6842	55.0892	4.06486	0.197593	0.760686	0.563093	0.0543971	hyper
13	83091817	83092764	18894301	18894319	467908	19	948	49.8947	-55.0714	-1.86306	-0.113742	0.540117	0.653858	0.0523465	hypo
29	31820961	31822428	33014789	33014813	1392404	25	1468	58.72	55.0708	2.74462	0.100706	0.493297	0.392592	0.0515041	hyper
1	130000355	130001462	1450017	1450042	128958	26	1108	42.6154	55.0515	2.28471	0.101383	0.74557	0.644187	0.048027	hyper
9	95841875	95842663	13491833	13491852	2135110	20	789	39.45	-55.0496	-1.85811	-0.147854	0.630536	0.77839	0.0599745	hypo
22	30595690	30596193	27605413	27605434	1108390	22	504	22.9091	-55.0445	-2.12019	-0.12869	0.559412	0.688102	0.0465535	hypo
17	33000606	33001666	22659941	22659962	710936	22	1061	48.2273	55.0152	3.03758	0.176056	0.711806	0.53575	0.0499782	hyper
13	11733232	11733892	17776390	17776409	415064	20	661	33.05	-55.0131	-1.86734	-0.122034	0.617825	0.739858	0.0442323	hypo
29	47036106	47036634	33249274	33249295	1402884	22	529	24.0455	55.0048	2.91812	0.100853	0.766166	0.665313	0.0493758	hyper
1	126190485	126191055	1399642	1399657	125566	16	571	35.6875	55.0026	3.8173	0.155737	0.688328	0.532591	0.0480927	hyper
27	13513580	13514348	31442587	31442612	1301544	26	769	29.5769	-54.9873	-1.86042	-0.114302	0.596708	0.711011	0.0527307	hypo
12	21967720	21968137	16757608	16757634	348847	27	418	15.4815	54.9503	2.1567	0.100791	0.716568	0.615776	0.0500284	hyper
17	70283210	70283776	23216398	23216417	739650	20	567	28.35	54.9494	3.58406	0.197775	0.876816	0.679041	0.0570198	hyper
12	15191716	15192283	16649441	16649458	343820	18	568	31.5556	-54.9465	-2.31222	-0.132365	0.716166	0.848531	0.045206	hypo
6	104651212	104651928	9289005	9289029	1833352	25	717	28.68	54.9425	2.63342	0.115264	0.753084	0.63782	0.0507288	hyper
8	105874210	105874610	12200592	12200609	2038924	18	401	22.2778	-54.9257	-2.70136	-0.113995	0.553418	0.667413	0.0478408	hypo
3	55278869	55279630	4199427	4199448	1456330	22	762	34.6364	-54.9257	-2.14733	-0.119461	0.55738	0.676841	0.0456293	hypo
27	613522	614460	31270641	31270666	1290185	26	939	36.1154	54.9199	2.22413	0.106512	0.630929	0.524417	0.0455241	hyper
18	5523006	5523459	23343985	23344006	745016	22	454	20.6364	54.8973	2.6811	0.151211	0.768332	0.61712	0.0472322	hyper
19	6247322	6247912	24308963	24308979	795946	17	591	34.7647	-54.8848	-2.09204	-0.201897	0.586659	0.788555	0.0601803	hypo
29	47393075	47393556	33255610	33255627	1403072	18	482	26.7778	54.8725	3.58678	0.172184	0.704683	0.532499	0.0511465	hyper
12	12060599	12061243	16595525	16595536	341663	12	645	53.75	-54.8701	-3.20958	-0.204989	0.600444	0.805433	0.0452379	hypo
16	79643955	79644483	22237265	22237283	679525	19	529	27.8421	54.8517	3.18215	0.188421	0.652661	0.464241	0.0591803	hyper
22	5253090	5253604	27238997	27239024	1087623	28	515	18.3929	54.8492	2.04136	0.175888	0.765381	0.589492	0.0695517	hyper
2	114827222	114827900	3190693	3190714	947417	22	679	30.8636	-54.8397	-1.93252	-0.146739	0.142808	0.289547	0.0677769	hypo
5	23137271	23138119	6837561	6837582	1646638	22	849	38.5909	-54.8356	-1.91348	-0.109285	0.669726	0.779011	0.0451122	hypo
9	4173910	4174202	12369910	12369930	2048063	21	293	13.9524	54.8219	2.96734	0.145169	0.762171	0.617002	0.0504781	hyper
5	74050676	74051117	7461315	7461335	1693587	21	442	21.0476	-54.8062	-2.1698	-0.120429	0.624395	0.744824	0.0505471	hypo
13	28430810	28431228	18025479	18025497	428700	19	419	22.0526	-54.7948	-2.26249	-0.123607	0.330379	0.453986	0.0485905	hypo
8	66142886	66143941	11681573	11681596	2003761	24	1056	44	54.7825	3.16379	0.106318	0.7281	0.621782	0.0445399	hyper
15	27249465	27249988	20361290	20361310	563969	21	524	24.9524	-54.782	-1.92889	-0.150393	0.527178	0.677571	0.0567629	hypo
5	48367797	48368505	7148720	7148738	1669709	19	709	37.3158	54.7612	3.63637	0.176396	0.733928	0.557532	0.0556089	hyper
26	27242120	27243174	30863641	30863662	1272607	22	1055	47.9545	54.759	2.93177	0.178082	0.523411	0.345329	0.0613094	hyper
13	18557952	18558539	17885667	17885688	420286	22	588	26.7273	54.7516	2.98939	0.137634	0.746843	0.609209	0.0457993	hyper
2	65668547	65669410	2632442	2632458	899388	17	864	50.8235	54.7377	3.72971	0.196525	0.747038	0.550513	0.0442824	hyper
10	80215763	80216379	14664577	14664600	222493	24	617	25.7083	-54.732	-1.914	-0.101997	0.67506	0.777057	0.0481537	hypo
5	93122691	93122899	7681518	7681539	1712041	22	209	9.5	54.7251	2.49777	0.153043	0.667224	0.514181	0.0448853	hyper
1	77270689	77271380	852354	852378	76975	25	692	27.68	-54.712	-2.01766	-0.127147	0.623032	0.750179	0.046363	hypo
4	110141962	110142967	6387030	6387053	1617848	24	1006	41.9167	-54.7073	-1.93099	-0.246333	0.418424	0.664757	0.0814159	hypo
X	9575060	9575559	33417450	33417475	2149551	26	500	19.2308	54.6874	2.36238	0.105989	0.455486	0.349497	0.0484001	hyper
10	5982506	5984021	13744081	13744102	155713	22	1516	68.9091	54.6778	2.97102	0.108262	0.64574	0.537478	0.0510297	hyper
20	17165548	17166187	25502553	25502575	976068	23	640	27.8261	-54.6704	-1.93116	-0.116775	0.360638	0.477413	0.0509939	hypo
4	116218721	116219553	6486424	6486447	1621993	24	833	34.7083	54.6652	2.55952	0.101037	0.679734	0.578696	0.0493718	hyper
26	45027012	45027298	31136001	31136014	1286218	14	287	20.5	-54.654	-2.36622	-0.133456	0.571536	0.704991	0.0464724	hypo
29	28855908	28856574	32966249	32966268	1390370	20	667	33.35	-54.6529	-1.96748	-0.131126	0.626262	0.757388	0.048603	hypo
18	64483748	64484077	24227667	24227684	788662	18	330	18.3333	-54.6278	-2.49912	-0.124496	0.451955	0.576451	0.0503381	hypo
16	72461997	72462922	22102028	22102049	675017	22	926	42.0909	54.6205	2.77404	0.120185	0.619007	0.498822	0.0471512	hyper
27	42402949	42403513	31917995	31918020	1322858	26	565	21.7308	54.6197	2.32233	0.12604	0.62336	0.49732	0.0518789	hyper
19	62061424	62062003	25219399	25219415	833884	17	580	34.1176	54.6191	4.08097	0.166077	0.432189	0.266112	0.0556677	hyper
1	79303324	79304050	876768	876786	78893	19	727	38.2632	54.6184	3.64922	0.154864	0.749419	0.594555	0.0470772	hyper
27	40054391	40054930	31868255	31868274	1321570	20	540	27	-54.609	-2.36478	-0.140155	0.703337	0.843492	0.0526781	hypo
19	47125826	47126144	24945038	24945057	825395	20	319	15.95	-54.6055	-1.91605	-0.118989	0.606216	0.725205	0.0481062	hypo
24	60051189	60051451	29787668	29787693	1218390	26	263	10.1154	54.5882	2.22805	0.129324	0.56358	0.434256	0.0530686	hyper
13	43223341	43224250	18255475	18255494	439658	20	910	45.5	-54.5863	-1.84874	-0.110508	0.475061	0.585569	0.0471787	hypo
15	58127025	58127805	20756950	20756968	590545	19	781	41.1053	54.5803	3.39657	0.115156	0.605332	0.490177	0.0456175	hyper
23	28192905	28193374	28463176	28463195	1153214	20	470	23.5	54.5748	2.98414	0.160991	0.6556	0.494609	0.0517883	hyper
17	20675502	20676187	22542979	22543003	698036	25	686	27.44	54.5629	2.24833	0.196316	0.739628	0.543312	0.0476733	hyper
13	42834332	42834927	18249054	18249073	439387	20	596	29.8	54.5477	3.42377	0.138291	0.576165	0.437874	0.0464967	hyper
12	31622192	31622863	16905928	16905950	356478	23	672	29.2174	54.544	2.54413	0.115288	0.378432	0.263144	0.045536	hyper
7	97596152	97596888	10697396	10697412	1930045	17	737	43.3529	-54.5102	-2.71031	-0.19316	0.462505	0.655665	0.051823	hypo
25	37923719	37923899	30448164	30448191	1245474	28	181	6.46429	-54.4888	-1.82841	-0.116648	0.48526	0.601908	0.062777	hypo
12	78874068	78874920	17455962	17455984	399918	23	853	37.087	-54.472	-1.87991	-0.10398	0.737863	0.841844	0.0470997	hypo
29	49855031	49855373	33293908	33293928	1404354	21	343	16.3333	54.4377	2.90057	0.103686	0.561459	0.457773	0.0528537	hyper
12	24460337	24461418	16796275	16796299	350808	25	1082	43.28	54.4317	2.33294	0.120721	0.662868	0.542146	0.0518864	hyper
4	105803642	105804345	6333587	6333611	1613917	25	704	28.16	-54.4299	-1.88346	-0.156817	0.586079	0.742896	0.048722	hypo
19	62135560	62136312	25221062	25221080	833924	19	753	39.6316	-54.4164	-1.85524	-0.13793	0.666256	0.804186	0.0559714	hypo
13	53215030	53215474	18380217	18380235	448673	19	445	23.4211	-54.4146	-2.59159	-0.112718	0.631503	0.744221	0.0527588	hypo
14	46165013	46165574	19556417	19556433	506139	17	562	33.0588	-54.4035	-1.84192	-0.19037	0.251676	0.442045	0.0497622	hypo
27	37042930	37043794	31806653	31806673	1319891	21	865	41.1905	54.401	3.93466	0.154363	0.759237	0.604873	0.0456087	hyper
X	20360542	20361512	33528034	33528053	2158776	20	971	48.55	54.3779	3.54652	0.108629	0.634226	0.525597	0.0443061	hyper
25	32267123	32267891	30348845	30348861	1242161	17	769	45.2353	-54.3767	-2.0353	-0.143321	0.409786	0.553107	0.0505765	hypo
14	15396395	15397445	19137496	19137520	478974	25	1051	42.04	-54.3652	-1.95394	-0.107947	0.417685	0.525633	0.0488276	hypo
7	91787821	91788411	10618018	10618043	1924853	26	591	22.7308	-54.3606	-2.02714	-0.143328	0.677971	0.821299	0.0603168	hypo
16	43382439	43383063	21689062	21689085	652103	24	625	26.0417	54.351	2.77505	0.168384	0.798356	0.629972	0.0686646	hyper
4	119830337	119830838	6560124	6560150	1623963	27	502	18.5926	-54.3476	-1.86568	-0.192722	0.470242	0.662965	0.0728048	hypo
16	39942703	39943456	21639870	21639891	649381	22	754	34.2727	-54.3398	-1.91895	-0.12304	0.625082	0.748122	0.0465273	hypo
23	45097639	45098090	28727284	28727307	1166168	24	452	18.8333	-54.33	-1.88086	-0.112003	0.629454	0.741457	0.049943	hypo
16	46991893	46992476	21744869	21744888	654599	20	584	29.2	54.3216	3.04798	0.151444	0.698428	0.546984	0.0518897	hyper
23	3506567	3506997	28112315	28112334	1134282	20	431	21.55	-54.3205	-1.98431	-0.143458	0.29659	0.440047	0.0495499	hypo
17	58546321	58547089	23005509	23005529	732535	21	769	36.619	-54.3079	-1.83703	-0.114775	0.404947	0.519723	0.048194	hypo
28	25973444	25974436	32299645	32299661	1348873	17	993	58.4118	-54.3076	-2.16334	-0.16409	0.597815	0.761905	0.0503156	hypo
13	80098121	80098738	18824752	18824770	466469	19	618	32.5263	-54.305	-2.29891	-0.136873	0.567846	0.704719	0.0443337	hypo
15	66577310	66577820	20875347	20875369	597850	23	511	22.2174	-54.3041	-2.05061	-0.119396	0.519815	0.639211	0.059174	hypo
23	51742695	51743218	28872652	28872678	1169723	27	524	19.4074	54.2925	2.47634	0.107133	0.662688	0.555555	0.0518095	hyper
18	60443079	60443819	24167141	24167160	786214	20	741	37.05	-54.2492	-1.8449	-0.118895	0.660965	0.779861	0.0479672	hypo
22	57974730	57975065	28024308	28024329	1129477	22	336	15.2727	-54.2396	-1.93568	-0.113353	0.359301	0.472654	0.0547164	hypo
2	60564482	60565192	2571728	2571744	894411	17	711	41.8235	54.2319	3.67038	0.157602	0.597672	0.440071	0.0456812	hyper
1	90530234	90531934	1013291	1013311	89419	21	1701	81	54.2215	2.87857	0.19169	0.704355	0.512665	0.0535067	hyper
12	9377339	9378724	16552387	16552407	339647	21	1386	66	54.2115	2.97021	0.137453	0.739459	0.602007	0.0499296	hyper
1	148141319	148141685	1687099	1687123	144369	25	367	14.68	54.2069	2.25831	0.111385	0.763693	0.652308	0.0455907	hyper
13	76828633	76829169	18753396	18753417	464888	22	537	24.4091	54.1575	2.90129	0.134965	0.568063	0.433098	0.0471529	hyper
19	60793575	60794104	25188686	25188701	833337	16	530	33.125	54.1514	4.89197	0.221277	0.687289	0.466012	0.0528853	hyper
10	71760869	71761584	14555652	14555668	214662	17	716	42.1176	-54.1488	-2.42939	-0.153839	0.317424	0.471262	0.0516198	hypo
4	95909177	95910186	6187307	6187327	1606084	21	1010	48.0952	54.119	3.26904	0.137592	0.739457	0.601865	0.0516584	hyper
16	55980320	55981426	21861588	21861607	661582	20	1107	55.35	54.1164	4.18193	0.130043	0.751858	0.621815	0.0444485	hyper
26	40085113	40085431	31048163	31048179	1283205	17	319	18.7647	-54.1089	-1.85216	-0.223607	0.319665	0.543272	0.0676675	hypo
12	51058886	51060171	17133598	17133619	374926	22	1286	58.4545	-54.0524	-1.83072	-0.154289	0.512296	0.666585	0.0573444	hypo
17	17645899	17646355	22503952	22503971	695304	20	457	22.85	-54.0479	-1.92649	-0.128761	0.281745	0.410506	0.0571188	hypo
9	64115656	64116267	13067113	13067134	2106771	22	612	27.8182	54.0457	2.57447	0.179238	0.64759	0.468352	0.0673981	hyper
12	51811368	51812101	17141650	17141674	375686	25	734	29.36	-54.0389	-1.94305	-0.102589	0.532182	0.634771	0.0486903	hypo
4	74915703	74916288	5934164	5934185	1586585	22	586	26.6364	54.0255	2.80628	0.157058	0.584077	0.42702	0.0527275	hyper
18	11086782	11087505	23451874	23451895	748218	22	724	32.9091	-54.0238	-1.884	-0.139401	0.264385	0.403786	0.0551356	hypo
6	97218335	97218654	9181324	9181346	1827438	23	320	13.913	-54.019	-1.97355	-0.158178	0.0416156	0.199794	0.0577628	hypo
3	7995101	7996028	3631442	3631461	1412231	20	928	46.4	-53.9996	-2.44034	-0.15858	0.550666	0.709247	0.050946	hypo
12	8094355	8094732	16539825	16539834	338299	10	378	37.8	53.9796	6.41653	0.39188	0.665506	0.273625	0.0560393	hyper
2	55393965	55394793	2522013	2522035	888860	23	829	36.0435	53.9639	2.51927	0.192547	0.789593	0.597046	0.0648949	hyper
7	96160369	96160962	10679359	10679380	1928717	22	594	27	-53.9617	-2.03165	-0.136956	0.711045	0.848001	0.0542515	hypo
10	6607303	6607734	13752473	13752488	156274	16	432	27	-53.9565	-2.73854	-0.149352	0.621286	0.770637	0.045783	hypo
2	94710197	94710591	2948006	2948028	928413	23	395	17.1739	-53.9381	-1.86571	-0.114553	0.155571	0.270124	0.0505497	hypo
23	24523086	24523795	28424714	28424736	1150511	23	710	30.8696	-53.936	-1.85859	-0.141363	0.646167	0.78753	0.0556594	hypo
8	16913131	16914532	11107718	11107742	1956108	25	1402	56.08	53.9273	2.8195	0.11016	0.572053	0.461893	0.0576397	hyper
8	11123296	11123960	11041416	11041437	1950405	22	665	30.2273	-53.9229	-1.97246	-0.12946	0.636237	0.765697	0.0551637	hypo
1	101197593	101198156	1129133	1129157	100288	25	564	22.56	53.9104	2.40587	0.107217	0.750642	0.643425	0.0533111	hyper
17	18676539	18677619	22520753	22520775	696030	23	1081	47	53.9089	2.98014	0.166867	0.795004	0.628137	0.0605041	hyper
2	122006869	122007342	3294053	3294072	953109	20	474	23.7	-53.9002	-1.86882	-0.101132	0.622829	0.72396	0.0449161	hypo
25	29952218	29952781	30311353	30311374	1240460	22	564	25.6364	-53.8902	-1.89963	-0.117369	0.637956	0.755325	0.0503793	hypo
4	103993155	103993357	6306905	6306922	1612592	18	203	11.2778	-53.8791	-2.43488	-0.112753	0.241377	0.35413	0.04769	hypo
12	16911959	16912372	16679845	16679866	344953	22	414	18.8182	53.8773	2.62628	0.129583	0.760425	0.630842	0.0467432	hyper
11	97822763	97823052	16316706	16316731	324950	26	290	11.1538	53.8638	2.31038	0.109303	0.801605	0.692302	0.0447084	hyper
11	102452561	102452922	16397341	16397366	327668	26	362	13.9231	53.8614	2.27509	0.138378	0.819111	0.680733	0.0456639	hyper
26	17711674	17712245	30736052	30736069	1264670	18	572	31.7778	-53.8566	-2.26902	-0.14763	0.0958228	0.243453	0.0559836	hypo
12	31495587	31496182	16903729	16903744	356411	16	596	37.25	53.8452	4.40108	0.194714	0.604743	0.410029	0.0468479	hyper
11	425737	426364	15033043	15033066	240169	24	628	26.1667	53.8282	3.08265	0.111112	0.754197	0.643085	0.0481863	hyper
22	10627586	10627751	27325472	27325488	1091519	17	166	9.76471	53.8212	3.33497	0.140645	0.803484	0.662839	0.0458495	hyper
7	66413361	66413692	10318554	10318574	1900129	21	332	15.8095	-53.8165	-2.43154	-0.116824	0.483484	0.600309	0.0514598	hypo
6	58348904	58349464	8743662	8743677	1789050	16	561	35.0625	-53.8069	-2.33522	-0.134778	0.634872	0.76965	0.0451978	hypo
24	60448829	60449196	29797174	29797191	1218578	18	368	20.4444	-53.8045	-2.34621	-0.134627	0.551624	0.68625	0.0475012	hypo
14	26375652	26376453	19300958	19300976	487805	19	802	42.2105	53.7963	3.36761	0.136441	0.741802	0.605361	0.0505661	hyper
1	73266931	73267456	806144	806155	73039	12	526	43.8333	-53.7935	-3.35671	-0.199848	0.396875	0.596723	0.0444501	hypo
4	114700592	114700749	6457025	6457044	1621117	20	158	7.9	-53.7871	-2.56353	-0.198861	0.565921	0.764782	0.0692448	hypo
X	133763163	133763556	34667956	34667976	2264452	21	394	18.7619	-53.7735	-2.04465	-0.119568	0.372495	0.492063	0.0589636	hypo
12	48823657	48824238	17106423	17106440	372771	18	582	32.3333	-53.7721	-2.09304	-0.123976	0.678562	0.802538	0.0456175	hypo
13	27418430	27419456	18011028	18011050	427862	23	1027	44.6522	53.7655	2.89024	0.125848	0.734388	0.60854	0.0443641	hyper
13	43088622	43089046	18253325	18253345	439565	21	425	20.2381	-53.765	-1.97287	-0.145936	0.428553	0.574489	0.0558582	hypo
11	50152273	50153071	15696648	15696665	283234	18	799	44.3889	-53.7565	-2.41216	-0.124202	0.70804	0.832242	0.0536007	hypo
28	4404753	4405136	32028284	32028299	1329005	16	384	24	53.7535	3.58353	0.168503	0.749969	0.581466	0.0525401	hyper
22	11255077	11255636	27336098	27336121	1091931	24	560	23.3333	-53.7294	-1.88227	-0.10399	0.505102	0.609092	0.0579487	hypo
19	40865364	40866120	24856066	24856087	820501	22	757	34.4091	53.7274	2.58411	0.129729	0.711749	0.58202	0.0462269	hyper
20	6925643	6926063	25362299	25362321	967022	23	421	18.3043	53.7253	2.61859	0.130298	0.852989	0.722691	0.049127	hyper
7	4962750	4963373	9552224	9552245	1846336	22	624	28.3636	53.7	2.83656	0.149093	0.78581	0.636717	0.0502245	hyper
19	20290821	20291396	24536703	24536722	805979	20	576	28.8	-53.6671	-1.98162	-0.129187	0.609398	0.738585	0.0511824	hypo
1	3968588	3968847	67133	67145	2654	13	260	20	-53.653	-2.80486	-0.19923	0.252348	0.451578	0.0492826	hypo
12	21979664	21980539	16757893	16757911	348853	19	876	46.1053	-53.6365	-1.86344	-0.153577	0.619685	0.773262	0.0561182	hypo
7	102551935	102553080	10758568	10758589	1934686	22	1146	52.0909	-53.6351	-2.13349	-0.138235	0.583434	0.721669	0.0541719	hypo
18	65514707	65515253	24244271	24244291	789383	21	547	26.0476	53.6306	2.7774	0.146706	0.860647	0.713941	0.0491527	hyper
29	49852052	49852488	33293848	33293865	1404351	18	437	24.2778	53.6232	3.58915	0.112406	0.618299	0.505893	0.0505044	hyper
1	79756921	79757527	883133	883150	79284	18	607	33.7222	53.5898	3.28336	0.13092	0.768942	0.638022	0.0439277	hyper
16	80220954	80221446	22246066	22246089	679832	24	493	20.5417	-53.5897	-1.91875	-0.125771	0.55457	0.680341	0.053281	hypo
12	84631099	84631502	17564271	17564287	403717	17	404	23.7647	53.566	3.66663	0.150454	0.83244	0.681986	0.0454458	hyper
5	87620683	87621007	7619253	7619275	1706548	23	325	14.1304	53.5538	2.44131	0.13211	0.82643	0.694319	0.0490714	hyper
19	15040623	15041383	24449766	24449785	802549	20	761	38.05	-53.5517	-1.86259	-0.139339	0.620419	0.759758	0.0612245	hypo
2	136027824	136028396	3529238	3529261	962111	24	573	23.875	-53.5413	-1.85595	-0.127973	0.419764	0.547737	0.0530091	hypo
23	28853130	28853683	28471826	28471845	1153687	20	554	27.7	53.5405	2.90706	0.157905	0.695395	0.53749	0.065924	hyper
6	86450833	86451220	9045342	9045359	1817383	18	388	21.5556	-53.5322	-2.08273	-0.126492	0.250692	0.377184	0.0504611	hypo
6	101965056	101965831	9247210	9247233	1831477	24	776	32.3333	-53.5208	-1.82796	-0.117212	0.549515	0.666727	0.0627211	hypo
19	14986353	14987096	24448613	24448634	802524	22	744	33.8182	-53.5206	-1.90637	-0.115781	0.653551	0.769333	0.0534121	hypo
11	24067426	24068561	15372005	15372028	259645	24	1136	47.3333	53.5152	2.50744	0.128646	0.741924	0.613278	0.0496022	hyper
9	91655631	91656318	13418278	13418299	2132290	22	688	31.2727	-53.5074	-1.88895	-0.101661	0.519275	0.620937	0.0463627	hypo
3	112981093	112981390	4899885	4899902	1509946	18	298	16.5556	-53.5007	-1.90038	-0.15826	0.644176	0.802436	0.0526471	hypo
21	5517586	5518037	26258578	26258601	1031028	24	452	18.8333	-53.4998	-1.91606	-0.113484	0.468556	0.58204	0.0566825	hypo
9	13083503	13083964	12471623	12471642	2056577	20	462	23.1	53.4927	3.10206	0.131914	0.543578	0.411664	0.0550428	hyper
10	99993982	99994836	14957378	14957397	238168	20	855	42.75	53.4828	3.14815	0.159886	0.67252	0.512633	0.04997	hyper
11	2010459	2011034	15061877	15061897	241136	21	576	27.4286	53.476	2.94212	0.113229	0.661311	0.548081	0.0478585	hyper
8	16871772	16872182	11106968	11106990	1956083	23	411	17.8696	-53.4559	-1.87566	-0.113228	0.711044	0.824272	0.0445376	hypo
12	32154559	32155292	16915047	16915066	356834	20	734	36.7	53.4522	2.87935	0.130845	0.77107	0.640225	0.0461664	hyper
19	25443118	25443736	24618352	24618372	809571	21	619	29.4762	53.4266	2.98528	0.13181	0.615072	0.483261	0.0494272	hyper
1	71050259	71051180	776739	776760	71095	22	922	41.9091	-53.4232	-1.82961	-0.130056	0.673594	0.80365	0.0455437	hypo
27	36946356	36946680	31804738	31804762	1319836	25	325	13	53.4199	2.20262	0.104871	0.544238	0.439367	0.0606126	hyper
21	67021018	67021443	27118197	27118221	1081800	25	426	17.04	-53.4127	-1.87725	-0.103593	0.71495	0.818543	0.0454072	hypo
1	81173039	81173813	901809	901832	80522	24	775	32.2917	53.3947	2.50524	0.109136	0.710488	0.601351	0.0441698	hyper
7	62674289	62674799	10271370	10271392	1896750	23	511	22.2174	-53.3769	-1.86158	-0.160058	0.543347	0.703405	0.057044	hypo
10	76363160	76363765	14611569	14611593	219121	25	606	24.24	53.3694	2.27358	0.111086	0.840348	0.729263	0.0491901	hyper
7	11758430	11758845	9637637	9637657	1851918	21	416	19.8095	-53.3685	-1.85098	-0.123971	0.759153	0.883123	0.0563366	hypo
11	1002923	1003621	15043662	15043676	240517	15	699	46.6	-53.3633	-1.86106	-0.220694	0.538809	0.759503	0.0544696	hypo
23	39811896	39812273	28626178	28626201	1163051	24	378	15.75	53.3619	2.4838	0.117824	0.651326	0.533502	0.0464	hyper
12	9240324	9240673	16551146	16551169	339537	24	350	14.5833	-53.335	-2.08144	-0.103535	0.620559	0.724093	0.045219	hypo
24	3990962	3991803	28965110	28965133	1172608	24	842	35.0833	53.3257	3.19355	0.119628	0.540367	0.420739	0.0526425	hyper
19	4528624	4529122	24286805	24286817	794398	13	499	38.3846	-53.3178	-2.52001	-0.22942	0.505001	0.734421	0.0460403	hypo
11	26419458	26420258	15406085	15406104	261553	20	801	40.05	53.3138	3.23325	0.215241	0.817396	0.602155	0.0569012	hyper
26	14055211	14055531	30687921	30687935	1261491	15	321	21.4	53.3116	4.12965	0.202786	0.718768	0.515982	0.0549052	hyper
17	19191573	19192105	22528059	22528079	696459	21	533	25.381	-53.3052	-2.49664	-0.145604	0.599129	0.744733	0.0528484	hypo
11	27311620	27312068	15416618	15416636	262274	19	449	23.6316	-53.2781	-1.83243	-0.137668	0.567254	0.704923	0.049378	hypo
19	29379803	29380891	24680875	24680897	812195	23	1089	47.3478	53.276	2.58022	0.130123	0.744446	0.614323	0.0494484	hyper
5	60185352	60186341	7280520	7280543	1681203	24	990	41.25	53.2609	2.57607	0.11375	0.686597	0.572847	0.0460775	hyper
19	51689227	51689691	25016841	25016863	828425	23	465	20.2174	53.2367	2.51869	0.113399	0.844043	0.730643	0.0461559	hyper
18	52878760	52879248	24046404	24046426	781303	23	489	21.2609	53.2342	2.67232	0.134938	0.475498	0.34056	0.0594875	hyper
19	7859389	7859752	24332290	24332308	797237	19	364	19.1579	-53.2219	-2.31268	-0.152363	0.658384	0.810747	0.053757	hypo
13	75651568	75652282	18730259	18730275	464239	17	715	42.0588	-53.2149	-1.88468	-0.135294	0.442552	0.577846	0.0466036	hypo
26	10552349	10552961	30639927	30639949	1258465	23	613	26.6522	53.194	2.49661	0.137022	0.728419	0.591397	0.0488009	hyper
29	50812967	50813439	33304650	33304668	1404799	19	473	24.8947	53.1711	3.29693	0.136302	0.770079	0.633777	0.048208	hyper
9	8850080	8850598	12414872	12414888	2052898	17	519	30.5294	-53.1701	-2.15884	-0.158144	0.419127	0.577271	0.0527343	hypo
1	43713101	43714128	470510	470523	43803	14	1028	73.4286	-53.1575	-2.65096	-0.170153	0.449294	0.619447	0.0477732	hypo
1	32279741	32280542	361279	361298	31632	20	802	40.1	53.1556	3.16302	0.117101	0.635257	0.518155	0.0567386	hyper
22	2017807	2018428	27189579	27189601	1085079	23	622	27.0435	53.1445	2.47185	0.109942	0.750084	0.640142	0.0460985	hyper
29	47273283	47273791	33253657	33253679	1403003	23	509	22.1304	-53.141	-1.89416	-0.135189	0.529483	0.664672	0.0612051	hypo
24	2985470	2986628	28944189	28944208	1172005	20	1159	57.95	-53.1368	-1.8732	-0.11084	0.599456	0.710296	0.045623	hypo
23	3691355	3691602	28116591	28116618	1134372	28	248	8.85714	-53.1298	-1.8434	-0.124653	0.450322	0.574975	0.0795407	hypo
23	48161797	48162393	28788897	28788915	1167993	19	597	31.4211	-53.115	-1.83309	-0.156271	0.599809	0.756081	0.0547323	hypo
4	119665240	119665605	6557179	6557204	1623845	26	366	14.0769	-53.1147	-1.84271	-0.112918	0.566952	0.67987	0.0627422	hypo
19	54484097	54484687	25065279	25065297	830097	19	591	31.1053	-53.103	-1.84847	-0.176136	0.660981	0.837117	0.0517932	hypo
23	17640988	17641574	28329540	28329559	1144725	20	587	29.35	-53.0992	-2.35783	-0.110753	0.510881	0.621634	0.0486245	hypo
5	40287570	40288139	7054194	7054205	1662092	12	570	47.5	-53.0888	-3.94517	-0.287641	0.362373	0.650014	0.0520093	hypo
24	57795385	57795734	29739795	29739815	1217121	21	350	16.6667	53.0828	2.75302	0.192748	0.587025	0.394278	0.0689293	hyper
16	27115684	27115998	21472554	21472573	637717	20	315	15.75	-53.0812	-2.08041	-0.116262	0.551056	0.667318	0.0501493	hypo
4	5450821	5451649	5097448	5097467	1519599	20	829	41.45	53.0811	2.92458	0.166381	0.770012	0.60363	0.0513351	hyper
22	54304511	54304756	27954682	27954705	1127362	24	246	10.25	-53.0725	-1.828	-0.118901	0.550519	0.66942	0.0454682	hypo
7	96132098	96132312	10678765	10678788	1928708	24	215	8.95833	-53.0639	-2.11731	-0.177007	0.518663	0.69567	0.0648914	hypo
1	119193436	119194282	1326710	1326731	118362	22	847	38.5	53.0613	2.97469	0.116449	0.636169	0.51972	0.0443833	hyper
19	45094834	45095307	24916522	24916542	823713	21	474	22.5714	53.043	2.7349	0.134628	0.6651	0.530472	0.0538661	hyper
3	45618463	45619315	4090145	4090167	1446922	23	853	37.087	-53.0407	-1.86603	-0.139111	0.684044	0.823154	0.0475749	hypo
5	115356049	115356486	8020279	8020300	1728345	22	438	19.9091	-53.0315	-1.83463	-0.102729	0.634739	0.737468	0.0461611	hypo
22	742351	742538	27172232	27172258	1083915	27	188	6.96296	53.0292	1.97614	0.127009	0.904268	0.777259	0.0453987	hyper
3	115269710	115270269	4942139	4942160	1511302	22	560	25.4545	53.0275	2.90576	0.15014	0.636738	0.486598	0.0469883	hyper
26	17776725	17777252	30737264	30737284	1264701	21	528	25.1429	-53.0195	-1.90542	-0.117164	0.702716	0.819881	0.0508023	hypo
29	45781745	45782099	33225744	33225765	1402209	22	355	16.1364	-53.0157	-1.86272	-0.179455	0.453652	0.633108	0.081714	hypo
26	48860460	48861239	31216294	31216313	1288194	20	780	39	-53.015	-1.82652	-0.113135	0.54597	0.659105	0.0467027	hypo
1	79154893	79155766	874695	874713	78773	19	874	46	-53.0115	-2.12332	-0.151885	0.431052	0.582936	0.0502685	hypo
19	52680177	52680965	25033040	25033064	829099	25	789	31.56	-53.009	-1.82708	-0.110197	0.496139	0.606336	0.0546553	hypo
4	7705198	7705921	5126440	5126457	1521464	18	724	40.2222	-53.0081	-2.21574	-0.126105	0.641353	0.767458	0.0480701	hypo
3	114996783	114997392	4936078	4936104	1511175	27	610	22.5926	53.0058	2.02452	0.124255	0.607166	0.482911	0.0556794	hyper
2	27086768	27087618	2203216	2203232	860325	17	851	50.0588	53.0053	3.78316	0.156931	0.637587	0.480656	0.0473985	hyper
28	5428913	5429855	32044104	32044124	1329753	21	943	44.9048	52.9855	3.02707	0.129762	0.643028	0.513266	0.0468089	hyper
19	6958648	6959331	24317269	24317293	796631	25	684	27.36	52.9767	2.31093	0.104708	0.697094	0.592386	0.0471796	hyper
22	36050835	36051582	27681210	27681233	1113163	24	748	31.1667	52.9749	2.35082	0.107459	0.796652	0.689194	0.0470832	hyper
15	53345220	53345451	20697651	20697672	586267	22	232	10.5455	52.9657	2.88913	0.102542	0.354072	0.25153	0.0465195	hyper
X	86759362	86759901	34124837	34124853	2219845	17	540	31.7647	52.9634	3.84127	0.159094	0.602701	0.443607	0.0474586	hyper
13	58636962	58637565	18463835	18463852	452295	18	604	33.5556	-52.9608	-1.93654	-0.132079	0.570967	0.703045	0.0462548	hypo
10	7882849	7883654	13771619	13771638	157317	20	806	40.3	52.9523	2.9979	0.181263	0.798978	0.617714	0.0483003	hyper
1	154018474	154018845	1795541	1795566	148000	26	372	14.3077	52.9141	2.23338	0.118245	0.807337	0.689093	0.0441448	hyper
8	72597543	72598204	11761333	11761352	2009541	20	662	33.1	52.9086	3.25306	0.145994	0.653167	0.507174	0.0458739	hyper
13	74581408	74582129	18711310	18711327	463630	18	722	40.1111	52.8978	3.6105	0.120598	0.916048	0.79545	0.0444415	hyper
1	139172624	139173598	1555004	1555017	137755	14	975	69.6429	52.8949	5.826	0.168223	0.690147	0.521924	0.0448484	hyper
10	58382760	58383133	14391958	14391983	201902	26	374	14.3846	-52.8939	-1.83177	-0.108474	0.50734	0.615814	0.0574848	hypo
21	60980757	60981787	27009597	27009618	1078055	22	1031	46.8636	-52.8901	-1.87262	-0.100162	0.574363	0.674525	0.0470971	hypo
8	59724209	59724758	11597968	11597985	1998199	18	550	30.5556	-52.8694	-2.01176	-0.124295	0.25867	0.382966	0.05064	hypo
X	134563744	134564461	34686553	34686577	2264774	25	718	28.72	-52.8648	-1.8373	-0.128119	0.609972	0.738091	0.0537383	hypo
7	106546188	106546842	10810105	10810125	1938401	21	655	31.1905	-52.8609	-1.91081	-0.111483	0.43703	0.548513	0.0493244	hypo
25	35142365	35143004	30401092	30401112	1243729	21	640	30.4762	52.86	2.86906	0.14026	0.670076	0.529815	0.047333	hyper
12	13764215	13764780	16625825	16625845	342806	21	566	26.9524	52.8596	4.04758	0.123355	0.731709	0.608354	0.048596	hyper
1	26556146	26556678	309317	309332	25478	16	533	33.3125	-52.8526	-2.06283	-0.101599	0.527678	0.629278	0.0501037	hypo
16	40981277	40982124	21651364	21651382	650404	19	848	44.6316	52.8507	2.97951	0.149609	0.665255	0.515645	0.0443615	hyper
6	68561998	68562434	8867003	8867022	1798916	20	437	21.85	-52.8498	-1.91894	-0.127189	0.550512	0.677701	0.0518782	hypo
9	100509487	100510215	13580469	13580492	2138102	24	729	30.375	52.8489	2.79242	0.130695	0.704876	0.574181	0.0470844	hyper
18	7648501	7649309	23391060	23391080	746050	21	809	38.5238	-52.8384	-1.83216	-0.113129	0.274533	0.387662	0.0521709	hypo
1	153908515	153908860	1792939	1792962	147949	24	346	14.4167	52.8379	2.6304	0.100927	0.660899	0.559972	0.0486155	hyper
22	51847624	51848070	27911694	27911712	1125807	19	447	23.5263	52.8304	3.04328	0.148704	0.638655	0.489951	0.0475664	hyper
28	24395158	24396069	32278244	32278269	1347462	26	912	35.0769	52.8292	2.18974	0.121762	0.651019	0.529257	0.0625253	hyper
16	56064004	56064356	21862804	21862824	661650	21	353	16.8095	52.8272	2.69231	0.124652	0.748155	0.623503	0.0474386	hyper
22	15919671	15920061	27412513	27412534	1095219	22	391	17.7727	-52.8262	-2.12586	-0.106084	0.757291	0.863375	0.0467155	hypo
11	99776417	99776899	16348063	16348088	326151	26	483	18.5769	-52.8166	-1.87548	-0.132269	0.407824	0.540093	0.0624491	hypo
7	34616258	34617495	9930307	9930331	1871520	25	1238	49.52	52.7925	2.29072	0.111825	0.526707	0.414883	0.0486229	hyper
10	47562092	47562536	14260182	14260201	191709	20	445	22.25	-52.7752	-1.92334	-0.124608	0.44802	0.572628	0.0509511	hypo
11	29256001	29256621	15443807	15443828	263832	22	621	28.2273	52.7673	2.53032	0.135203	0.87442	0.739218	0.0450013	hyper
24	57599698	57600041	29735399	29735418	1217031	20	344	17.2	-52.7459	-1.92105	-0.130257	0.665197	0.795454	0.0562719	hypo
2	119378638	119379050	3254640	3254665	951234	26	413	15.8846	52.7391	2.16445	0.164197	0.607942	0.443745	0.0702538	hyper
10	6435405	6435991	13750088	13750103	156113	16	587	36.6875	-52.7386	-2.37544	-0.146811	0.586828	0.733639	0.0482467	hypo
16	68961645	68962331	22042947	22042965	672594	19	687	36.1579	52.736	3.36337	0.132985	0.780083	0.647098	0.0459197	hyper
15	66395192	66395720	20871834	20871853	597751	20	529	26.45	52.7316	2.8121	0.141997	0.646626	0.504629	0.0457191	hyper
5	72011244	72011955	7433871	7433889	1691909	19	712	37.4737	-52.7248	-1.9633	-0.10782	0.647723	0.755543	0.0522094	hypo
5	49801221	49802330	7169108	7169126	1670979	19	1110	58.4211	-52.6981	-1.82716	-0.122471	0.63137	0.753841	0.0452967	hypo
29	46198008	46198770	33234633	33234655	1402405	23	763	33.1739	52.6954	2.75465	0.118455	0.891082	0.772627	0.0506907	hyper
5	112630134	112630795	7971339	7971360	1726750	22	662	30.0909	52.6816	3.01736	0.117297	0.557921	0.440624	0.0449565	hyper
5	22278680	22279266	6826051	6826072	1645849	22	587	26.6818	52.6748	2.50801	0.126586	0.624103	0.497517	0.0464964	hyper
10	18084996	18085356	13925332	13925351	165141	20	361	18.05	52.6747	2.74356	0.140816	0.829674	0.688858	0.044523	hyper
5	106146393	106146813	7859172	7859193	1722844	22	421	19.1364	52.671	2.5625	0.107757	0.64045	0.532692	0.046643	hyper
21	55107013	55107926	26917167	26917189	1073985	23	914	39.7391	52.6689	2.4948	0.106829	0.866278	0.759449	0.0457295	hyper
21	21799288	21799770	26500414	26500435	1043628	22	483	21.9545	52.6646	2.53241	0.115994	0.631507	0.515512	0.0541894	hyper
19	14092600	14093292	24434237	24434257	801888	21	693	33	52.654	3.0346	0.193515	0.796392	0.602876	0.0635542	hyper
7	20188065	20188597	9756039	9756060	1857941	22	533	24.2273	52.6484	2.65537	0.105875	0.71503	0.609155	0.0508014	hyper
7	74324193	74324884	10410084	10410107	1907892	24	692	28.8333	-52.6435	-1.96487	-0.116177	0.389078	0.505255	0.0503834	hypo
5	104018157	104018787	7819847	7819867	1721682	21	631	30.0476	-52.6291	-1.89575	-0.125355	0.542192	0.667547	0.04807	hypo
22	21331806	21332459	27483836	27483853	1100065	18	654	36.3333	52.6144	3.09343	0.129428	0.757823	0.628395	0.0462978	hyper
22	46295308	46296130	27832048	27832071	1121607	24	823	34.2917	52.6106	2.41702	0.120111	0.663764	0.543653	0.047393	hyper
15	29936416	29936744	20401265	20401281	566011	17	329	19.3529	-52.6071	-2.91573	-0.164836	0.410913	0.575749	0.0578893	hypo
20	36441696	36442899	25736631	25736657	994710	27	1204	44.5926	52.6001	2.02154	0.114933	0.71176	0.596827	0.0458257	hyper
6	22222871	22223261	8356510	8356534	1752565	25	391	15.64	52.56	2.23601	0.144366	0.730307	0.585941	0.0575097	hyper
21	45022518	45023398	26804548	26804565	1063790	18	881	48.9444	-52.5567	-2.02946	-0.141392	0.6648	0.806193	0.0456209	hypo
18	48511271	48511560	23978170	23978187	778492	18	290	16.1111	-52.5487	-1.83481	-0.148396	0.717345	0.865741	0.0518877	hypo
24	4146106	4146499	28967937	28967960	1172709	24	394	16.4167	52.5188	2.4509	0.131061	0.824364	0.693303	0.0492512	hyper
8	8838847	8839381	11002923	11002941	1948815	19	535	28.1579	52.5108	3.2531	0.166614	0.744972	0.578358	0.0493127	hyper
29	17638455	17638948	32830339	32830358	1380057	20	494	24.7	52.4942	2.8113	0.148485	0.600679	0.452194	0.0556406	hyper
22	4980148	4980508	27234156	27234175	1087440	20	361	18.05	-52.4872	-2.23729	-0.140709	0.523953	0.664662	0.0489055	hypo
23	41647086	41647605	28659617	28659636	1164235	20	520	26	52.4796	3.62953	0.148231	0.734515	0.586284	0.0543588	hyper
17	69791206	69791625	23207928	23207946	739345	19	420	22.1053	-52.4782	-1.95838	-0.10412	0.622936	0.727056	0.0462726	hypo
9	12000509	12000994	12456245	12456266	2055725	22	486	22.0909	52.4756	2.63866	0.107296	0.440779	0.333482	0.0562059	hyper
19	31722998	31723758	24720070	24720090	813704	21	761	36.2381	52.4693	2.95543	0.139114	0.659937	0.520823	0.051335	hyper
23	48042013	48042451	28786089	28786108	1167926	20	439	21.95	52.4573	2.70614	0.158153	0.763857	0.605704	0.0553059	hyper
4	91819984	91820376	6127290	6127308	1602948	19	393	20.6842	52.4545	3.193	0.124423	0.624176	0.499753	0.0483382	hyper
28	5211577	5212085	32039875	32039889	1329627	15	509	33.9333	-52.4472	-2.03398	-0.132038	0.520782	0.65282	0.0487522	hypo
4	90982257	90982523	6117546	6117557	1602146	12	267	22.25	-52.4246	-4.36118	-0.209567	0.593629	0.803196	0.0490438	hypo
17	2376714	2377159	22279151	22279166	682754	16	446	27.875	-52.4191	-3.1729	-0.208965	0.502745	0.71171	0.0632549	hypo
11	7732157	7732671	15160664	15160679	244811	16	515	32.1875	-52.4153	-2.4792	-0.196631	0.500324	0.696955	0.0499411	hypo
X	136896488	136897228	34739961	34739980	2265681	20	741	37.05	52.3899	3.17871	0.117346	0.702406	0.58506	0.0474687	hyper
20	71660432	71660996	26191486	26191509	1025800	24	565	23.5417	52.3887	2.29988	0.14034	0.660855	0.520515	0.0553599	hyper
6	99024226	99024753	9208832	9208849	1828887	18	528	29.3333	-52.3884	-1.97719	-0.136589	0.309856	0.446446	0.0479685	hypo
9	36333813	36334638	12750955	12750974	2078983	20	826	41.3	-52.3873	-1.93261	-0.164749	0.50037	0.665119	0.0448631	hypo
23	51625631	51626151	28870576	28870594	1169645	19	521	27.4211	52.3746	3.3665	0.122422	0.506864	0.384442	0.048827	hyper
2	120130509	120131743	3264921	3264945	951796	25	1235	49.4	52.3737	2.23312	0.106321	0.730117	0.623796	0.0490993	hyper
29	44913857	44914232	33212206	33212228	1401699	23	376	16.3478	52.3734	2.42145	0.12191	0.778618	0.656708	0.0550404	hyper
8	80720396	80721221	11866158	11866182	2016948	25	826	33.04	52.3698	2.26422	0.121108	0.725743	0.604635	0.0448223	hyper
27	36954171	36954395	31804898	31804914	1319841	17	225	13.2353	-52.3666	-1.91148	-0.164165	0.468697	0.632862	0.0510468	hypo
2	126994545	126995064	3367325	3367343	956813	19	520	27.3684	-52.36	-1.92618	-0.1068	0.545534	0.652334	0.0476041	hypo
4	71063451	71063777	5892724	5892744	1582663	21	327	15.5714	-52.3558	-1.98084	-0.130413	0.625175	0.755588	0.0545654	hypo
1	70492438	70493306	769725	769744	70605	20	869	43.45	52.3528	2.98422	0.228885	0.723362	0.494477	0.0607421	hyper
4	7853321	7853971	5127844	5127863	1521548	20	651	32.55	-52.3522	-2.04878	-0.124455	0.489945	0.6144	0.0479756	hypo
24	56586168	56586551	29712107	29712125	1216585	19	384	20.2105	-52.3506	-2.03298	-0.129023	0.491103	0.620126	0.0471592	hypo
3	116509137	116509608	4969002	4969021	1511882	20	472	23.6	52.3439	2.94822	0.161933	0.809468	0.647535	0.0441998	hyper
12	25081334	25082156	16804669	16804688	351368	20	823	41.15	52.3221	2.95331	0.149078	0.775453	0.626375	0.0482271	hyper
1	123006824	123007336	1365360	1365373	122386	14	513	36.6429	52.3139	4.28729	0.196977	0.675275	0.478298	0.0472812	hyper
29	46345186	46345832	33237498	33237513	1402478	16	647	40.4375	-52.3054	-1.95411	-0.160716	0.502775	0.663491	0.0553502	hypo
1	76546653	76546858	845219	845238	76188	20	206	10.3	-52.2996	-2.58991	-0.140224	0.642447	0.782671	0.0447953	hypo
X	17035233	17035772	33497392	33497411	2156725	20	540	27	-52.2995	-1.92594	-0.109547	0.525212	0.634759	0.0499177	hypo
6	113349271	113349511	9413690	9413710	1840179	21	241	11.4762	-52.2989	-1.84725	-0.104514	0.653123	0.757638	0.045067	hypo
13	15880515	15880941	17838007	17838028	418536	22	427	19.4091	52.2885	2.56304	0.115573	0.762811	0.647238	0.0449744	hyper
17	49262254	49263086	22855547	22855573	726022	27	833	30.8519	52.2882	2.00647	0.110337	0.777461	0.667124	0.0569943	hyper
18	42981531	42982182	23902064	23902088	774031	25	652	26.08	52.2776	2.33634	0.108384	0.753279	0.644895	0.0470778	hyper
19	59569582	59569966	25162476	25162501	832689	26	385	14.8077	52.2713	2.11082	0.105131	0.846411	0.74128	0.04976	hyper
23	3685688	3686159	28116422	28116444	1134371	23	472	20.5217	52.2597	2.64647	0.141195	0.714368	0.573173	0.0568137	hyper
26	31782804	31784070	30917136	30917157	1276969	22	1267	57.5909	-52.2583	-2.20882	-0.159215	0.562833	0.722048	0.0560253	hypo
13	43043451	43044212	18252535	18252553	439541	19	762	40.1053	-52.2538	-2.05358	-0.147848	0.712025	0.859873	0.0597418	hypo
16	76651010	76651628	22174498	22174520	677892	23	619	26.913	-52.2498	-1.96797	-0.142129	0.704832	0.846961	0.0613149	hypo
13	71828543	71828987	18667975	18667990	461720	16	445	27.8125	-52.2333	-2.34565	-0.13439	0.592433	0.726823	0.0507682	hypo
11	98426639	98427155	16326874	16326896	325336	23	517	22.4783	-52.2313	-1.87804	-0.157485	0.548105	0.70559	0.0642756	hypo
16	53996194	53997522	21838872	21838897	659667	26	1329	51.1154	52.2217	2.17896	0.109822	0.730171	0.620349	0.044646	hyper
6	38325151	38325765	8533774	8533794	1768794	21	615	29.2857	52.2189	3.15781	0.124574	0.67686	0.552285	0.0560235	hyper
5	116843555	116843786	8046991	8047005	1729149	15	232	15.4667	52.2172	3.98374	0.195484	0.783166	0.587682	0.0485022	hyper
24	54555691	54556477	29672599	29672622	1215363	24	787	32.7917	52.2104	2.59109	0.109075	0.805911	0.696835	0.0471807	hyper
11	101166464	101167081	16372527	16372547	326948	21	618	29.4286	52.2011	3.21489	0.121405	0.564008	0.442603	0.0496437	hyper
6	114163934	114164269	9428553	9428566	1840624	14	336	24	-52.1919	-2.32879	-0.149344	0.677846	0.827191	0.0455955	hypo
5	90358386	90359232	7650720	7650740	1709283	21	847	40.3333	52.1836	2.66872	0.163772	0.808082	0.64431	0.0517736	hyper
14	39286109	39286777	19473004	19473023	499508	20	669	33.45	-52.1538	-2.30595	-0.119158	0.60815	0.727308	0.0475679	hypo
4	98956920	98957278	6234705	6234728	1608432	24	359	14.9583	-52.1231	-1.84924	-0.153579	0.620127	0.773706	0.0563636	hypo
12	16916647	16917267	16679914	16679933	344957	20	621	31.05	52.089	2.87834	0.157647	0.63852	0.480873	0.050505	hyper
12	86424578	86425124	17605879	17605895	404637	17	547	32.1765	52.0855	3.47654	0.122093	0.616552	0.494459	0.0464235	hyper
5	115877614	115878096	8029743	8029754	1728654	12	483	40.25	-52.0853	-3.31863	-0.269441	0.523769	0.79321	0.0573407	hypo
1	73757542	73758084	813663	813677	73399	15	543	36.2	-52.0764	-2.42115	-0.176345	0.659829	0.836173	0.052133	hypo
3	92066485	92066741	4611810	4611826	1492845	17	257	15.1176	52.0702	3.18551	0.183566	0.871054	0.687488	0.0518925	hyper
1	68760339	68761428	746473	746493	69069	21	1090	51.9048	52.0684	2.98041	0.136046	0.816685	0.68064	0.0448228	hyper
4	76431429	76432131	5952519	5952537	1587963	19	703	37	52.0675	2.99068	0.147507	0.670983	0.523476	0.0467217	hyper
13	79476040	79476585	18809763	18809788	466196	26	546	21	-52.0655	-1.83881	-0.134566	0.503772	0.638338	0.0682508	hypo
26	23377836	23378660	30814517	30814538	1269298	22	825	37.5	-52.0594	-1.92004	-0.117712	0.616178	0.73389	0.046316	hypo
17	52243761	52244096	22904663	22904682	728027	20	336	16.8	52.0592	2.76481	0.133384	0.599012	0.465628	0.0481892	hyper
20	5221756	5222566	25334842	25334862	965794	21	811	38.619	-52.0491	-2.03044	-0.103788	0.649323	0.75311	0.0455884	hypo
12	14520299	14520853	16638264	16638278	343331	15	555	37	-52.0314	-2.20184	-0.177549	0.241006	0.418555	0.0493281	hypo
12	16904594	16905249	16679760	16679781	344948	22	656	29.8182	-52.025	-2.00422	-0.136882	0.638728	0.77561	0.0590971	hypo
19	32777508	32778497	24738796	24738814	814405	19	990	52.1053	52.0222	3.13734	0.136857	0.77506	0.638203	0.0508227	hyper
8	101392212	101392672	12127177	12127191	2035720	15	461	30.7333	-52.0161	-2.83127	-0.135902	0.600542	0.736444	0.046975	hypo
21	57644510	57644969	26956426	26956439	1075861	14	460	32.8571	-52.0146	-2.95968	-0.212811	0.350826	0.563636	0.0495057	hypo
4	31180531	31181283	5423598	5423612	1543498	15	753	50.2	51.9878	3.83664	0.217893	0.769281	0.551388	0.047649	hyper
3	113094214	113094869	4902593	4902614	1509993	22	656	29.8182	51.9783	2.67408	0.126969	0.662457	0.535488	0.0489946	hyper
22	5541549	5542336	27244180	27244202	1087803	23	788	34.2609	-51.9645	-2.04269	-0.104976	0.617837	0.722813	0.0463061	hypo
20	66049247	66050356	26088289	26088308	1022576	20	1110	55.5	51.9583	3.09995	0.149266	0.715691	0.566425	0.0490392	hyper
20	6177695	6178530	25350230	25350252	966456	23	836	36.3478	-51.9576	-1.93816	-0.105627	0.383619	0.489246	0.0501056	hypo
13	73797840	73798637	18700639	18700649	462984	11	798	72.5455	51.9447	7.49595	0.236973	0.79729	0.560318	0.0484503	hyper
5	96608068	96609205	7726886	7726905	1715243	20	1138	56.9	-51.9427	-1.83161	-0.160791	0.436751	0.597543	0.0530028	hypo
16	74982392	74983502	22143672	22143688	676753	17	1111	65.3529	51.9425	4.25437	0.161092	0.542432	0.381339	0.0531247	hyper
1	155509489	155510204	1824116	1824135	149010	20	716	35.8	-51.9376	-1.83971	-0.109721	0.320343	0.430064	0.0467365	hypo
22	10937245	10937950	27330714	27330731	1091727	18	706	39.2222	-51.9287	-1.86211	-0.10827	0.527394	0.635664	0.0464269	hypo
22	47372890	47373249	27848917	27848936	1122429	20	360	18	-51.8986	-1.84387	-0.210107	0.654541	0.864649	0.0549065	hypo
12	49723214	49723470	17117050	17117067	373664	18	257	14.2778	51.897	3.0385	0.12969	0.593984	0.464293	0.0475092	hyper
8	14134130	14134609	11075369	11075390	1953390	22	480	21.8182	51.8892	2.48556	0.101995	0.724559	0.622564	0.0447811	hyper
9	74762843	74763062	13195249	13195268	2117221	20	220	11	-51.8864	-2.30946	-0.127676	0.483825	0.611502	0.0500526	hypo
2	92121782	92122566	2914194	2914215	926042	22	785	35.6818	51.8862	3.22172	0.103169	0.612457	0.509288	0.0566835	hyper
12	8066871	8067808	16539637	16539648	338264	12	938	78.1667	51.8844	4.48208	0.301101	0.526221	0.22512	0.0498017	hyper
5	115417270	115417525	8021222	8021241	1728383	20	256	12.8	51.8688	2.94982	0.146705	0.428615	0.281909	0.0588881	hyper
27	36925041	36925659	31804301	31804326	1319822	26	619	23.8077	51.8682	2.14684	0.104275	0.647813	0.543538	0.0486829	hyper
3	7996392	7997340	3631462	3631483	1412232	22	949	43.1364	-51.8648	-1.86966	-0.141288	0.609492	0.75078	0.0515406	hypo
5	97986498	97987040	7749183	7749206	1716239	24	543	22.625	51.8636	2.223	0.11838	0.768469	0.650089	0.0473379	hyper
15	74537027	74537563	20975984	20976006	605174	23	537	23.3478	-51.846	-1.99798	-0.108525	0.407763	0.516287	0.0569339	hypo
24	19726498	19727302	29148469	29148490	1187789	22	805	36.5909	51.8312	3.22416	0.103849	0.748598	0.644749	0.049997	hyper
6	71049540	71050291	8901047	8901070	1801073	24	752	31.3333	-51.8223	-1.86623	-0.118256	0.528299	0.646555	0.0518263	hypo
11	104056675	104057154	16423849	16423873	328472	25	480	19.2	51.8193	2.67566	0.101534	0.581181	0.479647	0.0456312	hyper
10	84987325	84987591	14739403	14739418	225931	16	267	16.6875	-51.8141	-2.62312	-0.154096	0.439234	0.59333	0.0491942	hypo
12	10686934	10687570	16571214	16571232	340742	19	637	33.5263	-51.811	-1.86045	-0.123538	0.293221	0.416758	0.0511834	hypo
20	690036	690472	25257383	25257399	962759	17	437	25.7059	-51.8091	-2.49026	-0.163455	0.441983	0.605438	0.0483683	hypo
6	112013036	112013415	9393820	9393843	1839376	24	380	15.8333	51.8083	2.31013	0.108656	0.665463	0.556806	0.0488637	hyper
29	44671075	44671323	33208465	33208488	1401539	24	249	10.375	51.7951	2.3338	0.179293	0.491117	0.311823	0.0603907	hyper
24	53363509	53364488	29651792	29651809	1214541	18	980	54.4444	-51.7869	-1.92479	-0.192218	0.545294	0.737511	0.0502037	hypo
[truncated: 29,753 more rows]

## Sheet: CC vs. HC_DMRs
The information of DMRs among clinical and healthy group																The information of DMRs among clinical and subclinical group																The information of DMRs among clinical and subclinical group																The information of DMRs among clinical and subclinical group
chr	start	end	idxStart	idxEnd	cluster	n	width	invdensity	areaStat	maxStat	meanDiff	group1.mean	group2.mean	tstat.sd	direction
10	43891915	43892303	14300613	14300662	188269	50	389	7.78	-206.518	-2.28064	-0.209589	0.491493	0.701082	0.0595516	hypo
16	2671791	2674397	21325048	21325113	613426	66	2607	39.5	198.31	4.18684	0.194032	0.726331	0.532299	0.0548838	hyper
22	55643519	55644834	28174880	28174939	1126001	60	1316	21.9333	195.481	4.11551	0.20052	0.672899	0.472379	0.0546071	hyper
24	31569491	31571099	29509965	29510033	1196172	69	1609	23.3188	-189.581	-2.00041	-0.118202	0.622759	0.740961	0.057866	hypo
X	42119987	42120731	33936395	33936435	2170346	41	745	18.1707	-187.714	-1.91954	-0.145144	0.443407	0.588551	0.0445971	hypo
23	31024344	31025967	28695612	28695690	1153527	79	1624	20.557	-187.591	-1.81137	-0.119451	0.229237	0.348688	0.0568875	hypo
10	75405101	75405880	14689839	14689892	217967	54	780	14.4444	-183.187	-1.88381	-0.107045	0.70424	0.811285	0.0529642	hypo
18	60025907	60026790	24323724	24323773	784650	50	884	17.68	-174.381	-1.96177	-0.197395	0.401889	0.599284	0.0789283	hypo
1	74829407	74830142	832055	832106	74349	52	736	14.1538	-171.361	-1.86834	-0.121618	0.10815	0.229769	0.0560237	hypo
21	65262491	65264156	27271349	27271407	1078905	59	1666	28.2373	-170.881	-1.97568	-0.204896	0.461985	0.666881	0.0596198	hypo
X	62914841	62915668	34143592	34143643	2191579	52	828	15.9231	-167.894	-1.89334	-0.110812	0.362984	0.473795	0.0483268	hypo
18	60302826	60303581	24327211	24327261	784843	51	756	14.8235	-167.762	-2.25367	-0.135361	0.162578	0.297939	0.0588907	hypo
7	6807952	6808772	9643734	9643768	1843976	35	821	23.4571	-166.309	-1.80752	-0.246377	0.496679	0.743056	0.0534177	hypo
18	64205878	64206454	24385353	24385401	787230	49	577	11.7755	-163.105	-2.16221	-0.139874	0.497442	0.637316	0.0552375	hypo
18	60357493	60358493	24328272	24328327	784873	56	1001	17.875	-162.381	-1.8708	-0.11217	0.172383	0.284553	0.0618909	hypo
19	58572396	58573351	25311326	25311387	830819	62	956	15.4194	-159.361	-1.91027	-0.169201	0.594319	0.76352	0.0524011	hypo
20	6444978	6446121	25529623	25529682	964903	60	1144	19.0667	-158.982	-1.90032	-0.157157	0.146249	0.303406	0.0611871	hypo
29	16715730	16717831	33051898	33051936	1376722	39	2102	53.8974	154.621	6.24753	0.251931	0.605601	0.353671	0.0529238	hyper
19	56083466	56084262	25265164	25265204	829539	41	797	19.439	-154.28	-2.57573	-0.240259	0.468821	0.70908	0.0717899	hypo
7	4238708	4240743	9600871	9600917	1842426	47	2036	43.3191	-148.642	-2.17436	-0.162215	0.643853	0.806068	0.0579228	hypo
13	81209170	81210189	18974902	18974947	466170	46	1020	22.1739	147.806	4.37062	0.175538	0.825893	0.650355	0.0490469	hyper
12	25177706	25178579	16911801	16911850	350896	50	874	17.48	-147.533	-1.79192	-0.136911	0.557359	0.69427	0.0625273	hypo
2	30617688	30618794	2258798	2258852	862279	55	1107	20.1273	-147.104	-1.90584	-0.145714	0.602137	0.74785	0.0577196	hypo
16	2683250	2684410	21325241	21325272	613431	32	1161	36.2812	-142.549	-1.83285	-0.19139	0.644527	0.835917	0.0512048	hypo
17	66494864	66495567	23301258	23301305	736242	48	704	14.6667	-142.253	-1.84342	-0.125419	0.499154	0.624573	0.0699589	hypo
2	14922410	14923541	2050186	2050250	847804	65	1132	17.4154	-141.992	-1.79141	-0.14235	0.190304	0.332654	0.05645	hypo
8	56237694	56240024	11632015	11632057	1991147	43	2331	54.2093	-137.214	-1.81392	-0.210306	0.554935	0.765242	0.0523924	hypo
12	79288819	79289464	17574372	17574407	399621	36	646	17.9444	-136.611	-2.96821	-0.192987	0.556038	0.749025	0.0593132	hypo
25	10230560	10231596	30216226	30216267	1223615	42	1037	24.6905	-136.439	-2.00788	-0.180111	0.564382	0.744493	0.0587469	hypo
24	55895367	55895717	29905298	29905338	1213960	41	351	8.56098	-136.149	-1.80098	-0.162158	0.609736	0.771893	0.0529382	hypo
9	97492550	97494254	13610277	13610336	2132273	60	1705	28.4167	135.783	3.12447	0.185628	0.766986	0.581358	0.0562142	hyper
5	119075532	119076186	8137370	8137413	1727138	44	655	14.8864	135.672	3.40249	0.245159	0.726691	0.481532	0.0641244	hyper
16	78170151	78170973	22348920	22348979	677723	60	823	13.7167	-135.18	-1.82967	-0.128961	0.39727	0.526231	0.0826555	hypo
6	111574834	111575526	9442339	9442371	1835652	33	693	21	-134.494	-3.13581	-0.16422	0.38453	0.54875	0.0528182	hypo
13	78139262	78140157	18901988	18902027	464844	40	896	22.4	132.488	3.91512	0.170413	0.602503	0.43209	0.0493747	hyper
18	12527793	12528698	23632694	23632729	747850	36	906	25.1667	-131.921	-1.90402	-0.15972	0.563518	0.723237	0.0546134	hypo
24	61460458	61461334	30028632	30028682	1216884	51	877	17.1961	-130.819	-1.79082	-0.17634	0.59892	0.77526	0.0700833	hypo
14	4605230	4606064	19092335	19092381	470155	47	835	17.766	-129.858	-2.02582	-0.132783	0.514125	0.646907	0.0533684	hypo
21	68806569	68806854	27339766	27339806	1080805	41	286	6.97561	-129.199	-2.20171	-0.140876	0.391764	0.532639	0.050843	hypo
29	48909383	48909902	33525409	33525435	1401046	27	520	19.2593	-128.824	-2.8287	-0.305095	0.398129	0.703224	0.0623017	hypo
20	22843232	22844238	25752046	25752083	979574	38	1007	26.5	-128.599	-1.87829	-0.177166	0.307633	0.4848	0.0542406	hypo
16	74694416	74695503	22280970	22281000	675520	31	1088	35.0968	127.529	6.30521	0.311585	0.775993	0.464408	0.0492608	hyper
17	72198990	72199694	23395417	23395468	739512	52	705	13.5577	127.273	2.73662	0.118806	0.780256	0.66145	0.0511496	hyper
11	99446416	99447143	16445331	16445366	325410	36	728	20.2222	126.788	4.19149	0.220461	0.277983	0.0575226	0.053911	hyper
20	58830064	58830892	26162631	26162673	1014845	43	829	19.2791	-126.018	-1.90617	-0.187618	0.417517	0.605135	0.0643663	hypo
2	70616977	70617313	2696593	2696644	903132	52	337	6.48077	-125.841	-1.80206	-0.167492	0.152821	0.320313	0.0555621	hypo
2	58351446	58352547	2562379	2562435	890609	57	1102	19.3333	-125.099	-1.83817	-0.102102	0.292096	0.394199	0.0600992	hypo
5	10281590	10282998	6735114	6735155	1630594	42	1409	33.5476	-124.967	-2.02473	-0.151003	0.353978	0.50498	0.0504725	hypo
18	64566667	64567237	24393173	24393207	787420	35	571	16.3143	-124.207	-1.92562	-0.167062	0.232975	0.400038	0.0610293	hypo
16	73505322	73506653	22261308	22261350	674708	43	1332	30.9767	123.529	3.311	0.193006	0.66211	0.469105	0.0538943	hyper
1	155042419	155043362	1825803	1825852	148500	50	944	18.88	-123.503	-1.87603	-0.128414	0.512405	0.640819	0.057745	hypo
11	35249137	35249713	15605354	15605384	269380	31	577	18.6129	-123.372	-2.85318	-0.173538	0.242676	0.416214	0.054646	hypo
11	46353005	46353760	15740783	15740816	279843	34	756	22.2353	-122.499	-2.19096	-0.205022	0.131806	0.336828	0.0560347	hypo
1	153908722	153909186	1803682	1803724	147751	43	465	10.814	120.59	3.0703	0.184956	0.664851	0.479894	0.0574515	hyper
11	83585414	83586069	16201350	16201393	313820	44	656	14.9091	-120.069	-1.83482	-0.113123	0.28033	0.393453	0.0505552	hypo
23	31411205	31411869	28702253	28702305	1153826	53	665	12.5472	-119.921	-1.79059	-0.184669	0.100625	0.285294	0.09975	hypo
19	56688865	56689770	25275268	25275303	829848	36	906	25.1667	119.729	3.86412	0.176378	0.814119	0.63774	0.0532145	hyper
17	71244824	71245673	23380509	23380552	739061	44	850	19.3182	-119.444	-1.96542	-0.223757	0.497752	0.721509	0.0818185	hypo
1	99206624	99206925	1115010	1115035	98111	26	302	11.6154	-119.052	-3.02599	-0.199161	0.129433	0.328595	0.0559078	hypo
13	35677318	35678284	18245648	18245691	433995	44	967	21.9773	-118.197	-1.84167	-0.109182	0.48054	0.589723	0.0556068	hypo
18	47829037	47830517	24127011	24127062	776803	52	1481	28.4808	118.13	2.72934	0.129573	0.717896	0.588322	0.0544504	hyper
20	15315899	15317177	25657541	25657580	972419	40	1279	31.975	-117.374	-2.27758	-0.119044	0.438866	0.55791	0.0596345	hypo
2	135188540	135189282	3535978	3536016	959947	39	743	19.0513	-117.064	-1.88327	-0.143022	0.538654	0.681676	0.0568753	hypo
28	2911941	2912417	32239497	32239521	1325099	25	477	19.08	116.994	5.62092	0.313497	0.614109	0.300612	0.0576684	hyper
1	154109381	154110012	1808285	1808315	147843	31	632	20.3871	-116.155	-1.8127	-0.243753	0.365315	0.609068	0.0597848	hypo
16	74585129	74586343	22279295	22279341	675437	47	1215	25.8511	-116.088	-1.8132	-0.104954	0.330102	0.435055	0.0678919	hypo
19	58693238	58694585	25314234	25314279	830875	46	1348	29.3043	-115.915	-2.11929	-0.157827	0.510782	0.668609	0.0611826	hypo
5	98090097	98090813	7797534	7797569	1713177	36	717	19.9167	-115.764	-1.96684	-0.190023	0.367923	0.557946	0.0588763	hypo
26	31203004	31203304	31128354	31128398	1274105	45	301	6.68889	-115.734	-1.83512	-0.139691	0.230856	0.370547	0.0632524	hypo
22	21626036	21627051	27680378	27680416	1098195	39	1016	26.0513	-115.444	-2.06324	-0.196458	0.508906	0.705364	0.0591155	hypo
13	46593489	46594537	18422567	18422602	441610	36	1049	29.1389	-114.595	-2.21451	-0.114526	0.206011	0.320537	0.0505204	hypo
12	85733645	85734504	17701397	17701445	403720	49	860	17.551	-114.296	-1.79498	-0.141823	0.242161	0.383985	0.0673746	hypo
8	107057773	107059335	12295701	12295742	2036147	42	1563	37.2143	-113.821	-2.19239	-0.113393	0.0707268	0.18412	0.0643334	hypo
28	26642614	26643154	32543238	32543281	1346688	44	541	12.2955	-113.812	-1.79532	-0.113819	0.465445	0.579265	0.0511318	hypo
12	35378691	35379346	17082422	17082461	358227	40	656	16.4	-113.374	-2.11342	-0.175226	0.521709	0.696935	0.0756432	hypo
17	71437711	71438803	23382837	23382882	739151	46	1093	23.7609	-113.075	-1.79263	-0.141961	0.414475	0.556436	0.0771734	hypo
16	2614173	2615116	21324006	21324038	613391	33	944	28.6061	-112.85	-1.94882	-0.198367	0.494336	0.692703	0.0542536	hypo
10	7586145	7587293	13852801	13852826	156923	26	1149	44.1923	-112.826	-2.06393	-0.222942	0.454534	0.677476	0.0525883	hypo
29	40757275	40757737	33391383	33391424	1396121	42	463	11.0238	-112.309	-2.5151	-0.170334	0.361256	0.531591	0.0656617	hypo
29	16795012	16796592	33053297	33053329	1376773	33	1581	47.9091	112.271	4.26614	0.269704	0.724776	0.455072	0.0603223	hyper
18	52010310	52011183	24193021	24193048	779492	28	874	31.2143	-111.53	-1.89304	-0.218973	0.259978	0.478951	0.0697663	hypo
24	61443094	61444115	30028145	30028188	1216877	44	1022	23.2273	-111.128	-1.99961	-0.15436	0.568027	0.722388	0.0535735	hypo
1	153317797	153318281	1790789	1790829	147453	41	485	11.8293	-110.844	-2.20887	-0.139099	0.721564	0.860663	0.0574076	hypo
23	30028145	30028861	28682755	28682786	1152694	32	717	22.4062	-110.812	-2.22914	-0.201909	0.436254	0.638163	0.0574256	hypo
10	100034506	100035304	15051684	15051731	237896	48	799	16.6458	-110.739	-1.81251	-0.159853	0.291164	0.451017	0.0759584	hypo
1	73755657	73756225	818327	818352	73322	26	569	21.8846	110.548	5.00943	0.256241	0.70856	0.452319	0.0606403	hyper
13	75651356	75652282	18850976	18851005	463541	30	927	30.9	-110.33	-2.00041	-0.156459	0.503071	0.65953	0.0503813	hypo
5	82047958	82049178	7596004	7596042	1698096	39	1221	31.3077	-110.166	-2.03343	-0.202875	0.423594	0.626469	0.0742601	hypo
22	60065353	60066379	28258043	28258092	1128499	50	1027	20.54	110.071	2.4358	0.137449	0.803528	0.66608	0.0483665	hyper
27	5977425	5978331	31574163	31574209	1291996	47	907	19.2979	109.937	2.56851	0.157446	0.775243	0.617797	0.059009	hyper
15	7483599	7484353	20256049	20256089	544597	41	755	18.4146	-109.899	-1.82898	-0.111205	0.547298	0.658503	0.0680934	hypo
1	74471156	74471841	827189	827233	74029	45	686	15.2444	-109.712	-1.81718	-0.132786	0.559583	0.692368	0.0579565	hypo
12	85661770	85662834	17699560	17699598	403678	39	1065	27.3077	-109.71	-1.99126	-0.154213	0.324967	0.47918	0.0670042	hypo
18	57804782	57805520	24289405	24289445	783017	41	739	18.0244	-109.511	-1.80569	-0.133889	0.284535	0.418424	0.0696307	hypo
16	4548409	4549542	21357833	21357875	614604	43	1134	26.3721	109.444	3.06817	0.125855	0.713755	0.5879	0.0516912	hyper
3	112981093	112981956	4930380	4930419	1506919	40	864	21.6	-108.929	-1.81823	-0.176999	0.594117	0.771116	0.0681572	hypo
6	60224887	60225325	8823951	8823992	1787318	42	439	10.4524	-108.861	-2.12731	-0.142193	0.24715	0.389343	0.0714194	hypo
5	81151977	81152499	7586006	7586035	1697189	30	523	17.4333	-108.758	-2.61723	-0.133942	0.340078	0.47402	0.0503895	hypo
2	134576574	134577059	3524098	3524135	959638	38	486	12.7895	-108.668	-2.3358	-0.124836	0.455089	0.579925	0.0511949	hypo
20	48811322	48811973	26049418	26049465	1005120	48	652	13.5833	-108.218	-1.88825	-0.113352	0.159945	0.273297	0.0578258	hypo
12	81182305	81182649	17602868	17602901	401222	34	345	10.1471	-108.061	-2.47763	-0.165468	0.536436	0.701904	0.0709636	hypo
6	103068888	103069765	9319684	9319720	1828856	37	878	23.7297	107.803	3.61193	0.139094	0.688155	0.549061	0.0509886	hyper
X	108635156	108635587	34618033	34618070	2237171	38	432	11.3684	-107.756	-1.89482	-0.110618	0.266266	0.376884	0.0505224	hypo
18	52860321	52861167	24206509	24206543	780054	35	847	24.2	-107.667	-1.96377	-0.149603	0.600743	0.750346	0.0583073	hypo
23	23406871	23407420	28609377	28609411	1147383	35	550	15.7143	-107.564	-1.80876	-0.220859	0.215366	0.436225	0.0625092	hypo
24	53645016	53645814	29864300	29864337	1212484	38	799	21.0263	107.507	3.27197	0.197611	0.472842	0.275231	0.052443	hyper
20	9866591	9867190	25583520	25583560	967546	41	600	14.6341	-107.383	-2.00269	-0.108171	0.139636	0.247806	0.0559858	hypo
10	101825539	101826353	15093506	15093540	238747	35	815	23.2857	-107.034	-1.82508	-0.187068	0.349558	0.536625	0.073101	hypo
13	37506114	37506985	18272952	18272993	435457	42	872	20.7619	-106.972	-1.83479	-0.147756	0.13298	0.280736	0.0648592	hypo
23	43795921	43796877	28902313	28902347	1163303	35	957	27.3429	-106.907	-1.89124	-0.153309	0.384612	0.537921	0.0499145	hypo
12	21954699	21955405	16862936	16862967	348295	32	707	22.0938	-106.315	-2.18596	-0.165253	0.302672	0.467925	0.0538604	hypo
1	93915981	93916543	1049693	1049731	93026	39	563	14.4359	-106.234	-1.80954	-0.125774	0.279389	0.405164	0.0710681	hypo
2	80897736	80898327	2805404	2805448	913288	45	592	13.1556	-106.216	-1.91254	-0.107944	0.117144	0.225088	0.0499923	hypo
4	14376690	14377666	5260533	5260577	1523815	45	977	21.7111	-105.983	-1.86013	-0.12905	0.254443	0.383493	0.0529612	hypo
8	98591792	98593002	12158706	12158745	2029940	40	1211	30.275	105.839	3.09251	0.184294	0.793247	0.608953	0.067393	hyper
23	40130704	40131582	28830600	28830635	1161194	36	879	24.4167	-105.676	-1.81298	-0.113038	0.632144	0.745182	0.0555073	hypo
X	135595905	135596777	34966123	34966154	2261383	32	873	27.2812	-105.586	-1.79177	-0.135025	0.546857	0.681883	0.0470171	hypo
5	88434474	88435322	7675555	7675599	1704193	45	849	18.8667	-105.556	-1.80767	-0.111522	0.114263	0.225785	0.066244	hypo
1	26582433	26583326	311634	311675	25490	42	894	21.2857	-105.253	-1.96409	-0.118136	0.101198	0.219335	0.0763151	hypo
12	69177184	69178149	17436187	17436227	392796	41	966	23.561	-105.195	-1.94185	-0.107789	0.597751	0.70554	0.0558952	hypo
5	118555515	118556293	8127830	8127866	1726842	37	779	21.0541	-105.154	-1.84447	-0.129103	0.404891	0.533993	0.0524702	hypo
26	47859036	47859598	31415554	31415598	1285177	45	563	12.5111	-105.037	-1.96571	-0.119795	0.554387	0.674182	0.0726935	hypo
13	72356739	72357865	18796408	18796448	461399	41	1127	27.4878	104.745	3.20993	0.151717	0.466576	0.314859	0.0490121	hyper
5	25152050	25152589	6910867	6910896	1645092	30	540	18	-104.726	-2.0854	-0.153351	0.212134	0.365485	0.0551661	hypo
1	107842039	107842712	1200017	1200045	107140	29	674	23.2414	-104.572	-2.86129	-0.19509	0.599185	0.794275	0.0574492	hypo
2	63030952	63031846	2616391	2616427	895264	37	895	24.1892	-104.252	-1.89355	-0.163528	0.48518	0.648708	0.0634984	hypo
5	93264386	93265896	7729339	7729377	1709033	39	1511	38.7436	-104.242	-1.83059	-0.154075	0.363472	0.517548	0.0652523	hypo
1	117892262	117893665	1315897	1315931	117056	35	1404	40.1143	-104.018	-1.88952	-0.140372	0.672509	0.812881	0.0551461	hypo
1	155252202	155252699	1829762	1829791	148646	30	498	16.6	-103.949	-2.5394	-0.145349	0.429727	0.575076	0.0530392	hypo
8	62084743	62085418	11699987	11700014	1996700	28	676	24.1429	-103.92	-2.34363	-0.208762	0.512947	0.721709	0.0628615	hypo
27	37330939	37331437	32041169	32041208	1317462	40	499	12.475	-103.867	-2.23146	-0.108548	0.10166	0.210208	0.0536792	hypo
19	62747285	62747944	25408439	25408471	832808	33	660	20	-103.384	-1.91933	-0.134774	0.539835	0.67461	0.0503261	hypo
24	53577152	53577657	29862799	29862834	1212443	36	506	14.0556	-103.368	-1.79242	-0.143533	0.622195	0.765728	0.0560484	hypo
19	42510053	42510276	25048758	25048783	820462	26	224	8.61538	-103.243	-3.02466	-0.271005	0.54751	0.818515	0.0674076	hypo
18	38102996	38103957	23984991	23985023	769128	33	962	29.1515	-103.214	-2.05457	-0.144112	0.199797	0.343909	0.0546446	hypo
11	98730727	98731516	16434293	16434323	324990	31	790	25.4839	-103.149	-1.90109	-0.17169	0.321382	0.493073	0.0532189	hypo
10	15679499	15680637	13976730	13976774	163136	45	1139	25.3111	-103.094	-1.82207	-0.10068	0.198233	0.298913	0.054334	hypo
7	94588963	94589816	10723937	10723975	1923973	39	854	21.8974	-102.616	-2.0813	-0.135009	0.262364	0.397372	0.0513996	hypo
18	23464577	23465453	23796342	23796376	755976	35	877	25.0571	-102.559	-1.91833	-0.151915	0.50055	0.652465	0.0605606	hypo
24	41853602	41854279	29679463	29679495	1203638	33	678	20.5455	-102.544	-2.85097	-0.151884	0.240505	0.392389	0.0614087	hypo
22	34507274	34507758	27850364	27850400	1109859	37	485	13.1081	-102.24	-2.13417	-0.126842	0.286633	0.413475	0.0652376	hypo
22	10454352	10455214	27512422	27512458	1089464	37	863	23.3243	-101.993	-1.99163	-0.156203	0.59964	0.755843	0.0541601	hypo
15	80557427	80558352	21203529	21203576	608700	48	926	19.2917	-101.412	-1.79481	-0.141047	0.335346	0.476392	0.0745251	hypo
4	117679852	117680256	6558582	6558624	1619551	43	405	9.4186	-101.351	-1.79598	-0.123257	0.634501	0.757758	0.0802769	hypo
12	35073919	35075172	17076506	17076539	358038	34	1254	36.8824	101.265	3.18062	0.181092	0.750078	0.568986	0.0497874	hyper
16	75282097	75282893	22292294	22292322	675843	29	797	27.4828	-101.235	-1.94461	-0.145684	0.565722	0.711407	0.0508926	hypo
8	102330214	102330703	12215784	12215822	2032962	39	490	12.5641	-101.105	-1.94908	-0.101527	0.501013	0.60254	0.056108	hypo
17	59557083	59558200	23170808	23170843	732231	36	1118	31.0556	-101.061	-1.89706	-0.115019	0.452383	0.567402	0.0594826	hypo
5	104494741	104495716	7875002	7875039	1718793	38	976	25.6842	-100.927	-2.22238	-0.104234	0.336276	0.440511	0.0617625	hypo
10	75325520	75326128	14689002	14689040	217886	39	609	15.6154	-100.639	-1.90017	-0.129071	0.274172	0.403244	0.0610966	hypo
6	111421590	111422489	9439795	9439830	1835552	36	900	25	-100.63	-1.8304	-0.191322	0.427842	0.619164	0.0612506	hypo
21	35002564	35003877	26873714	26873746	1051952	33	1314	39.8182	100.566	3.72528	0.224105	0.782455	0.558349	0.0492379	hyper
10	7761424	7762297	13856017	13856055	157031	39	874	22.4103	-100.407	-1.87287	-0.23899	0.0657884	0.304779	0.0739362	hypo
4	66166160	66167609	5862200	5862238	1575189	39	1450	37.1795	100.349	2.83402	0.141232	0.709688	0.568455	0.054762	hyper
13	81809341	81809937	18990065	18990103	466417	39	597	15.3077	-100.34	-1.89016	-0.105341	0.486545	0.591886	0.0518792	hypo
6	111022838	111023685	9432027	9432063	1835323	37	848	22.9189	-100.037	-1.83249	-0.108979	0.69769	0.806669	0.052519	hypo
6	65572364	65572794	8882220	8882260	1792794	41	431	10.5122	-100.008	-1.84984	-0.10426	0.101159	0.20542	0.0567714	hypo
23	48739835	48741532	29002076	29002120	1166174	45	1698	37.7333	99.9669	2.62537	0.170693	0.697437	0.526744	0.0544221	hyper
3	3657467	3658072	3600148	3600179	1405452	32	606	18.9375	-99.8591	-2.09919	-0.158077	0.162	0.320076	0.0510476	hypo
19	56612944	56613852	25274538	25274567	829809	30	909	30.3	99.5196	3.78734	0.118063	0.634807	0.516744	0.0525326	hyper
15	34155854	34156126	20598752	20598785	568094	34	273	8.02941	-99.5091	-1.90557	-0.170662	0.428655	0.599317	0.0710257	hypo
9	23119045	23119791	12670224	12670256	2062592	33	747	22.6364	99.5053	3.62577	0.163695	0.803022	0.639327	0.0506405	hyper
29	45813198	45814116	33468473	33468508	1399430	36	919	25.5278	-99.4084	-1.93685	-0.15523	0.341763	0.496993	0.0678352	hypo
1	142827777	142828800	1616029	1616054	140409	26	1024	39.3846	-99.317	-2.91912	-0.154172	0.636792	0.790964	0.0532528	hypo
19	22919553	22920319	24745228	24745260	806500	33	767	23.2424	99.2944	3.28356	0.187031	0.657783	0.470752	0.0515512	hyper
29	15789849	15791425	33038059	33038093	1375997	35	1577	45.0571	99.0417	3.21516	0.202452	0.640809	0.438357	0.0519287	hyper
7	17977796	17978369	9784963	9784993	1853091	31	574	18.5161	99.0356	3.92731	0.184242	0.533846	0.349604	0.0494128	hyper
6	12113679	12114922	8277415	8277452	1739847	38	1244	32.7368	-98.8501	-1.79657	-0.143748	0.307411	0.451158	0.0604392	hypo
18	58495787	58497051	24298906	24298945	783583	40	1265	31.625	98.8398	2.94378	0.103846	0.741361	0.637514	0.0508791	hyper
13	18623534	18624266	18000188	18000222	419789	35	733	20.9429	-98.7677	-1.8243	-0.102233	0.592016	0.694249	0.0506784	hypo
15	66848838	66849874	21013933	21013964	596996	32	1037	32.4062	-98.7629	-1.88541	-0.156513	0.486197	0.64271	0.0572024	hypo
3	85835264	85835733	4558215	4558246	1484472	32	470	14.6875	-98.7463	-2.246	-0.13536	0.381712	0.517072	0.0665155	hypo
13	3824409	3825119	17777281	17777309	407922	29	711	24.5172	-98.4699	-2.14329	-0.209924	0.579617	0.789541	0.0608869	hypo
6	112692997	112693636	9460532	9460568	1836319	37	640	17.2973	-98.4006	-1.80431	-0.112429	0.236486	0.348915	0.0689579	hypo
11	1247717	1248630	15142471	15142503	240362	33	914	27.697	98.0836	3.4049	0.173352	0.724742	0.551389	0.0497682	hyper
15	69116715	69117595	21039992	21040025	599245	34	881	25.9118	-97.9893	-2.40415	-0.159633	0.499297	0.65893	0.0545518	hypo
X	138603557	138604290	35032539	35032573	2262680	35	734	20.9714	97.97	3.40813	0.167365	0.837056	0.669691	0.0446994	hyper
19	61363053	61363865	25375357	25375387	832162	31	813	26.2258	-97.967	-1.83015	-0.137336	0.312555	0.449891	0.0546526	hypo
25	25698135	25698964	30456306	30456337	1235120	32	830	25.9375	-97.74	-1.92586	-0.233504	0.648065	0.881568	0.0654602	hypo
14	26838917	26839900	19434697	19434728	487229	32	984	30.75	-97.4827	-1.86522	-0.116164	0.159702	0.275865	0.0557837	hypo
10	100118300	100118767	15053271	15053306	237946	36	468	13	-97.4019	-1.82139	-0.147211	0.538584	0.685796	0.053022	hypo
12	21048283	21048979	16847458	16847491	347765	34	697	20.5	-97.262	-1.87508	-0.167953	0.491554	0.659506	0.061935	hypo
26	30386549	30387330	31116419	31116450	1273427	32	782	24.4375	-97.1169	-1.94429	-0.167596	0.548996	0.716592	0.0655796	hypo
25	40590982	40591879	30718418	30718452	1244497	35	898	25.6571	96.9447	3.16934	0.167485	0.658943	0.491458	0.0559841	hyper
20	10598404	10599076	25594595	25594628	968148	34	673	19.7941	-96.8393	-1.92586	-0.107803	0.437222	0.545024	0.0535317	hypo
10	80215537	80216408	14756021	14756055	222210	35	872	24.9143	-96.6617	-1.81901	-0.153519	0.68084	0.834358	0.0546428	hypo
5	23193756	23194746	6881260	6881297	1643496	38	991	26.0789	-96.3974	-2.12148	-0.145148	0.610588	0.755735	0.0499779	hypo
25	290848	291445	30051013	30051056	1217593	44	598	13.5909	-96.2096	-1.80843	-0.158625	0.474788	0.633413	0.0832537	hypo
7	23097957	23098561	9857210	9857238	1856850	29	605	20.8621	96.1815	4.00273	0.204539	0.861157	0.656619	0.0628806	hyper
16	70443351	70444170	22210319	22210358	672535	40	820	20.5	95.8214	2.72725	0.123858	0.827003	0.703145	0.0489272	hyper
26	25548997	25549349	31065267	31065293	1268555	27	353	13.0741	-95.7892	-2.75679	-0.18328	0.373078	0.556357	0.0625514	hypo
5	67788059	67788554	7418390	7418419	1685347	30	496	16.5333	-95.7074	-1.85697	-0.163971	0.169911	0.333882	0.0546485	hypo
24	21919013	21919679	29384343	29384372	1187380	30	667	22.2333	-95.4859	-1.80155	-0.176281	0.614268	0.790549	0.0558991	hypo
29	1275909	1276938	32848806	32848834	1362942	29	1030	35.5172	95.3843	3.91666	0.165946	0.721884	0.555938	0.053024	hyper
2	128392036	128392759	3410020	3410044	956139	25	724	28.96	-95.3414	-1.86041	-0.185889	0.502304	0.688193	0.0552462	hypo
9	52191432	52192070	13016606	13016641	2091012	36	639	17.75	-95.2273	-2.23992	-0.154987	0.20968	0.364667	0.0671985	hypo
19	27995001	27996086	24823009	24823037	810107	29	1086	37.4483	-95.0724	-1.87596	-0.165074	0.395671	0.560745	0.0567383	hypo
20	5591261	5591925	25516166	25516200	964261	35	665	19	-95.0216	-2.05107	-0.144439	0.361006	0.505445	0.0603617	hypo
29	39949993	39950586	33379664	33379687	1395578	24	594	24.75	-94.7953	-2.47223	-0.18764	0.302502	0.490141	0.0561208	hypo
5	113390240	113390942	8032773	8032806	1723975	34	703	20.6765	-94.5504	-1.84673	-0.126029	0.231843	0.357871	0.0576122	hypo
12	84147442	84148136	17662915	17662952	402980	38	695	18.2895	-94.4618	-1.88576	-0.10351	0.491417	0.594927	0.0561488	hypo
28	12155233	12155815	32367348	32367386	1332933	39	583	14.9487	-94.3786	-2.04424	-0.132204	0.0505717	0.182776	0.0579886	hypo
9	69478679	69479571	13211837	13211868	2108443	32	893	27.9062	-94.3015	-1.91127	-0.128364	0.418558	0.546922	0.0561648	hypo
25	41390052	41390545	30731382	30731420	1244883	39	494	12.6667	-94.1353	-1.91429	-0.145792	0.58715	0.732942	0.0590388	hypo
21	7151258	7152294	26461700	26461728	1030559	29	1037	35.7586	-94.0954	-1.79214	-0.142405	0.626003	0.768408	0.0603598	hypo
1	73199178	73199607	809743	809772	72917	30	430	14.3333	-94.0889	-1.97428	-0.145332	0.579227	0.724558	0.0506512	hypo
8	111262654	111263151	12370964	12371004	2039053	41	498	12.1463	-94.0809	-1.8603	-0.109569	0.408102	0.517671	0.0594821	hypo
17	17891384	17891668	22653834	22653873	694361	40	285	7.125	-94.0542	-2.00166	-0.155504	0.466357	0.621861	0.0837111	hypo
6	111889514	111890902	9448248	9448295	1835842	48	1389	28.9375	93.9076	2.10425	0.121468	0.751614	0.630145	0.0542672	hyper
5	95907445	95908501	7762867	7762900	1711556	34	1057	31.0882	93.7862	3.09169	0.165089	0.655619	0.49053	0.0538065	hyper
21	7996532	7996750	26475404	26475439	1031194	36	219	6.08333	-93.7773	-1.84548	-0.152277	0.459633	0.61191	0.0566301	hypo
13	71381318	71382261	18780401	18780425	460762	25	944	37.76	93.5431	4.38017	0.240875	0.573921	0.333046	0.0540277	hyper
10	80346327	80347200	14758012	14758044	222302	33	874	26.4848	-93.406	-1.79167	-0.166582	0.492976	0.659558	0.058059	hypo
20	40997389	40998336	25971725	25971758	997138	34	948	27.8824	-93.1009	-1.87857	-0.140597	0.237284	0.377881	0.0557491	hypo
19	60643484	60644138	25358182	25358218	831847	37	655	17.7027	-93.0858	-1.81554	-0.114576	0.586537	0.701113	0.0603886	hypo
11	3054318	3055643	15173381	15173422	241497	42	1326	31.5714	92.9032	2.45403	0.146072	0.629639	0.483567	0.0586639	hyper
18	64483748	64484191	24391497	24391528	787368	32	444	13.875	-92.8616	-1.84344	-0.169704	0.376299	0.546004	0.0633264	hypo
X	90175628	90176256	34413045	34413073	2219358	29	629	21.6897	-92.836	-1.9155	-0.195065	0.429155	0.62422	0.0672176	hypo
6	24444111	24445041	8434954	8434985	1751413	32	931	29.0938	-92.8064	-2.09629	-0.106615	0.568708	0.675324	0.0535481	hypo
1	156046620	156047199	1844668	1844698	149181	31	580	18.7097	-92.6512	-1.84293	-0.113378	0.593579	0.706957	0.0496831	hypo
23	51447260	51447770	29067149	29067187	1167450	39	511	13.1026	-92.3824	-1.82583	-0.158543	0.484599	0.643142	0.0736897	hypo
11	68750962	68751794	15998905	15998937	301419	33	833	25.2424	-92.3481	-1.97992	-0.171487	0.491694	0.663181	0.0716791	hypo
6	12865457	12866112	8288190	8288214	1740521	25	656	26.24	-92.2841	-1.8069	-0.232866	0.457317	0.690182	0.0520532	hypo
1	81824593	81825507	916094	916125	81028	32	915	28.5938	-92.2549	-1.91494	-0.203235	0.568265	0.7715	0.0597988	hypo
10	83134058	83134691	14802474	14802511	224261	38	634	16.6842	-92.0957	-1.8646	-0.169756	0.508217	0.677973	0.0676202	hypo
13	79646453	79646985	18936115	18936153	465530	39	533	13.6667	-91.8958	-1.98993	-0.148679	0.376759	0.525438	0.0560035	hypo
23	42846206	42846604	28883671	28883696	1162745	26	399	15.3462	-91.8901	-2.54627	-0.206049	0.465925	0.671974	0.0560454	hypo
17	5317004	5317898	22466431	22466468	684145	38	895	23.5526	91.8413	2.72073	0.121839	0.631501	0.509662	0.0511592	hyper
29	5325637	5327010	32901733	32901763	1366522	31	1374	44.3226	91.7383	3.24608	0.176198	0.528348	0.35215	0.0530295	hyper
21	63794925	63795847	27243588	27243618	1078045	31	923	29.7742	-91.7024	-1.99517	-0.132962	0.52436	0.657322	0.0521831	hypo
27	26779394	26780381	31870959	31870992	1309705	34	988	29.0588	91.6966	3.39811	0.150349	0.650942	0.500593	0.0524528	hyper
8	38220620	38221384	11420811	11420847	1973623	37	765	20.6757	-91.6758	-1.80751	-0.127235	0.261431	0.388666	0.0616752	hypo
2	128491320	128492406	3411918	3411948	956192	31	1087	35.0645	-91.6311	-1.95279	-0.19227	0.507279	0.699549	0.0613734	hypo
9	95063691	95064657	13559650	13559683	2130970	34	967	28.4412	91.6104	3.27223	0.135838	0.624805	0.488966	0.0495727	hyper
29	45518441	45519431	33462625	33462643	1399297	19	991	52.1579	91.5303	5.82544	0.369198	0.71286	0.343662	0.0750953	hyper
18	63894901	63895849	24379478	24379507	787047	30	949	31.6333	91.3489	3.68075	0.171497	0.781308	0.609811	0.0506256	hyper
8	69833834	69834283	11798021	11798052	2003643	32	450	14.0625	-91.2177	-1.82701	-0.140917	0.713045	0.853961	0.0503802	hypo
6	113214842	113215785	9467791	9467819	1836639	29	944	32.5517	-91.1827	-1.84423	-0.118701	0.757241	0.875941	0.0504782	hypo
22	10552592	10553340	27514401	27514436	1089516	36	749	20.8056	91.1782	3.12739	0.153252	0.385733	0.232481	0.0573455	hyper
6	108905621	108906275	9401349	9401374	1833588	26	655	25.1923	-91.1301	-2.78507	-0.175375	0.450194	0.625569	0.0566474	hypo
19	6829966	6830785	24480133	24480163	795235	31	820	26.4516	-91.0961	-1.80712	-0.107429	0.357425	0.464854	0.0542576	hypo
23	3678739	3679840	28313215	28313256	1132286	42	1102	26.2381	91.0466	2.57365	0.158581	0.530544	0.371963	0.054627	hyper
19	60101571	60102451	25346981	25347010	831546	30	881	29.3667	90.6676	3.83085	0.239411	0.658405	0.418994	0.0577825	hyper
29	24299196	24300258	33141556	33141599	1383962	44	1063	24.1591	-90.6276	-1.8181	-0.101353	0.142903	0.244256	0.0629004	hypo
7	37314252	37315000	10022776	10022801	1870828	26	749	28.8077	-90.5713	-1.83212	-0.213563	0.235597	0.44916	0.0659143	hypo
20	17572223	17572897	25683358	25683386	974690	29	675	23.2759	-90.5703	-2.29678	-0.136685	0.599011	0.735696	0.0557541	hypo
16	26674781	26676101	21603426	21603455	636442	30	1321	44.0333	90.2847	3.65309	0.188951	0.700119	0.511168	0.0556214	hyper
13	51792346	51792878	18478440	18478470	446835	31	533	17.1935	-90.1947	-1.90457	-0.111384	0.231571	0.342955	0.0517468	hypo
8	73495470	73496467	11847552	11847580	2006704	29	998	34.4138	-90.0821	-1.84653	-0.124492	0.378211	0.502703	0.0539254	hypo
10	101304192	101304784	15080524	15080563	238519	40	593	14.825	-90.0148	-1.92903	-0.100092	0.48662	0.586712	0.0569202	hypo
27	37649659	37650560	32048943	32048969	1317605	27	902	33.4074	89.8057	3.69831	0.151938	0.841875	0.689938	0.0491424	hyper
23	25056624	25057056	28632353	28632384	1148776	32	433	13.5312	-89.762	-1.98006	-0.104979	0.104834	0.209814	0.0521338	hypo
2	90568986	90569534	2910842	2910877	923061	36	549	15.25	-89.7362	-1.822	-0.222031	0.178701	0.400732	0.0891721	hypo
19	22964836	22965498	24746243	24746275	806523	33	663	20.0909	-89.6743	-1.8286	-0.113001	0.505061	0.618062	0.0596717	hypo
1	68305270	68306248	745447	745473	68599	27	979	36.2593	89.6419	3.68715	0.101037	0.705947	0.604911	0.0501461	hyper
22	44082418	44083411	27994018	27994044	1117656	27	994	36.8148	-89.4975	-2.05662	-0.153391	0.64413	0.797521	0.0535497	hypo
22	59707779	59708319	28252387	28252416	1128298	30	541	18.0333	89.2979	3.40951	0.175197	0.497662	0.322465	0.0488427	hyper
19	20430905	20431644	24705337	24705370	804743	34	740	21.7647	-89.2338	-1.88765	-0.124699	0.578992	0.703691	0.0632642	hypo
3	31564134	31564905	3963726	3963765	1429722	40	772	19.3	-89.2044	-1.83449	-0.148999	0.403092	0.552091	0.065841	hypo
9	86703046	86703694	13428682	13428716	2124576	35	649	18.5429	-89.1392	-1.87481	-0.124807	0.51766	0.642467	0.0505189	hypo
8	73824799	73825754	11852658	11852694	2006970	37	956	25.8378	-88.9151	-1.84281	-0.142106	0.34668	0.488786	0.0668312	hypo
18	18222033	18222509	23714390	23714418	752158	29	477	16.4483	-88.884	-2.2216	-0.134959	0.335512	0.470471	0.0551599	hypo
24	60142646	60143953	29998231	29998272	1216200	42	1308	31.1429	88.7652	2.40288	0.108578	0.674136	0.565558	0.0535079	hyper
6	116615291	116616220	9528083	9528122	1838495	40	930	23.25	88.7425	3.01874	0.101856	0.682696	0.58084	0.0539005	hyper
6	111269801	111270571	9436588	9436619	1835476	32	771	24.0938	-88.6141	-1.79294	-0.139637	0.648267	0.787904	0.0517432	hypo
15	27781733	27782319	20499392	20499419	563489	28	587	20.9643	-88.5991	-1.96386	-0.141793	0.513738	0.655531	0.0511574	hypo
22	47663135	47664964	28047059	28047099	1120576	41	1830	44.6341	88.4265	2.48111	0.140207	0.851071	0.710864	0.0533031	hyper
27	28643823	28644484	31899116	31899153	1311232	38	662	17.4211	88.404	2.61697	0.138995	0.671843	0.532848	0.0491379	hyper
1	147241855	147242589	1683597	1683630	143464	34	735	21.6176	-88.4008	-1.8529	-0.134432	0.402061	0.536493	0.0642332	hypo
7	12666955	12668631	9711880	9711924	1848980	45	1677	37.2667	88.3783	2.21501	0.102603	0.766533	0.66393	0.0502351	hyper
19	19336494	19337519	24687795	24687833	804031	39	1026	26.3077	-88.3355	-1.82847	-0.113694	0.423078	0.536772	0.0513805	hypo
11	900938	901645	15135744	15135786	240181	43	708	16.4651	88.3103	2.24977	0.124032	0.609438	0.485405	0.0514177	hyper
5	66675460	66675857	7403815	7403854	1684353	40	398	9.95	-88.3025	-1.81161	-0.178871	0.246157	0.425029	0.0976535	hypo
23	7481385	7481915	28367988	28368018	1135482	31	531	17.129	-88.2823	-2.19456	-0.148017	0.105171	0.253189	0.0589639	hypo
2	135550642	135551322	3543052	3543082	960155	31	681	21.9677	-88.0287	-1.82073	-0.161858	0.370026	0.531884	0.0537638	hypo
13	16413548	16414354	17961826	17961856	418251	31	807	26.0323	88.0025	4.09063	0.134756	0.767373	0.632617	0.05004	hyper
1	141362984	141363841	1592773	1592804	139429	32	858	26.8125	-87.8867	-1.88347	-0.14356	0.511605	0.655165	0.0682569	hypo
29	48378908	48379905	33517639	33517675	1400764	37	998	26.973	87.8001	2.63765	0.151543	0.784628	0.633084	0.0587552	hyper
5	6062076	6063222	6680806	6680834	1626547	29	1147	39.5517	-87.7782	-1.98762	-0.161159	0.49917	0.660329	0.059999	hypo
17	46760728	46761710	22964275	22964303	723025	29	983	33.8966	-87.7407	-1.89071	-0.122158	0.431265	0.553423	0.051882	hypo
1	152339345	152340257	1773319	1773350	146791	32	913	28.5312	-87.7019	-1.8195	-0.131515	0.313326	0.444841	0.061277	hypo
7	109049004	109049314	10927576	10927609	1936599	34	311	9.14706	-87.4518	-2.18647	-0.139662	0.619367	0.759029	0.0611568	hypo
13	43088609	43089194	18368320	18368346	439012	27	586	21.7037	-87.4094	-1.81346	-0.215381	0.438535	0.653916	0.0664591	hypo
1	148967568	148968086	1712696	1712738	144629	43	519	12.0698	-87.2924	-1.82151	-0.140466	0.190099	0.330566	0.0640592	hypo
18	19562778	19563893	23736479	23736511	753034	33	1116	33.8182	-87.281	-1.80354	-0.15584	0.296129	0.451969	0.0591192	hypo
17	66953214	66953627	23311012	23311049	736444	38	414	10.8947	87.2776	2.4851	0.190424	0.598727	0.408303	0.0723486	hyper
7	23108284	23109103	9857446	9857478	1856856	33	820	24.8485	-87.2468	-1.9099	-0.129006	0.62287	0.751876	0.0505841	hypo
X	74517007	74517684	34253139	34253171	2203748	33	678	20.5455	-87.2382	-1.87881	-0.119081	0.261413	0.380494	0.0465529	hypo
8	23106027	23107028	11248007	11248029	1958785	23	1002	43.5652	87.1078	4.91565	0.278786	0.668714	0.389928	0.0529349	hyper
13	67009411	67010375	18711161	18711182	457715	22	965	43.8636	-87.0927	-1.83453	-0.193324	0.437928	0.631252	0.049097	hypo
1	113507294	113508415	1265673	1265702	112715	30	1122	37.4	-87.0529	-2.04872	-0.140206	0.535677	0.675883	0.0590275	hypo
14	300677	302059	19026922	19026951	467629	30	1383	46.1	86.9354	4.66871	0.184299	0.788316	0.604017	0.0527614	hyper
6	8273318	8274165	8238894	8238924	1735885	31	848	27.3548	-86.9346	-2.29328	-0.125368	0.231781	0.357149	0.0569121	hypo
13	10262910	10263905	17865614	17865649	413541	36	996	27.6667	-86.866	-1.91607	-0.135448	0.609008	0.744456	0.0603811	hypo
18	53839899	53840443	24222478	24222511	780663	34	545	16.0294	-86.7812	-1.80967	-0.176789	0.52876	0.705548	0.0651644	hypo
18	36797696	36798613	23966545	23966575	767990	31	918	29.6129	-86.6674	-2.06882	-0.139724	0.143044	0.282768	0.0569237	hypo
29	44230100	44230848	33443295	33443331	1398496	37	749	20.2432	86.6107	2.98054	0.161131	0.721728	0.560597	0.0561949	hyper
27	36854670	36855463	32030732	32030755	1317190	24	794	33.0833	-86.5853	-1.96893	-0.211139	0.521471	0.73261	0.055482	hypo
25	9153532	9153976	30196443	30196465	1223000	23	445	19.3478	-86.5761	-2.90626	-0.160265	0.225321	0.385586	0.054927	hypo
11	1760407	1761075	15151585	15151609	240708	25	669	26.76	-86.5501	-1.8534	-0.218464	0.46736	0.685824	0.0701901	hypo
15	21580718	21581230	20402733	20402763	558861	31	513	16.5484	-86.5091	-2.35687	-0.189284	0.56495	0.754234	0.0737341	hypo
10	19880163	19880918	14035792	14035809	166275	18	756	42	86.3595	6.35623	0.297189	0.704241	0.407052	0.0512755	hyper
11	89033513	89034091	16285173	16285201	317804	29	579	19.9655	-86.3407	-2.05016	-0.139927	0.407971	0.547899	0.0588738	hypo
23	16086640	16087204	28505192	28505220	1141515	29	565	19.4828	86.2579	3.39946	0.187354	0.67863	0.491276	0.0584943	hyper
10	8288958	8289624	13865380	13865407	157391	28	667	23.8214	-86.2485	-2.59701	-0.102293	0.563008	0.665301	0.0495375	hypo
21	62279583	62280243	27220119	27220154	1076899	36	661	18.3611	-86.1746	-1.81696	-0.113055	0.213463	0.326518	0.0540754	hypo
11	75079876	75080341	16086295	16086324	306658	30	466	15.5333	-86.1296	-2.13404	-0.142983	0.632658	0.775641	0.0533518	hypo
23	40424286	40425236	28835529	28835562	1161419	34	951	27.9706	-86.0421	-1.98732	-0.134599	0.521108	0.655707	0.0597369	hypo
4	24073322	24073763	5373272	5373309	1533380	38	442	11.6316	-85.9719	-1.83436	-0.113418	0.225496	0.338914	0.0589555	hypo
8	73882620	73883381	11853763	11853793	2006996	31	762	24.5806	-85.9559	-2.09358	-0.199699	0.441866	0.641565	0.0765255	hypo
20	41878737	41879341	25985997	25986026	997777	30	605	20.1667	-85.9125	-2.23792	-0.107402	0.562179	0.669581	0.0512929	hypo
27	19576627	19577589	31768385	31768413	1303516	29	963	33.2069	-85.9072	-1.89736	-0.131792	0.484465	0.616257	0.0561278	hypo
18	22619673	22620774	23782237	23782273	755421	37	1102	29.7838	-85.8947	-1.79703	-0.120746	0.206568	0.327314	0.0537996	hypo
12	53752141	53752665	17274809	17274836	376917	28	525	18.75	-85.8947	-2.14611	-0.213368	0.238153	0.451521	0.068502	hypo
14	76775839	76776643	20078784	20078819	533097	36	805	22.3611	85.8105	2.57878	0.152551	0.737361	0.58481	0.053738	hyper
19	59466638	59467181	25332456	25332489	831230	34	544	16	-85.8042	-1.79365	-0.124685	0.45646	0.581145	0.0670449	hypo
18	10756379	10756945	23599163	23599197	746889	35	567	16.2	-85.7592	-1.79913	-0.125805	0.586875	0.71268	0.0598385	hypo
27	38473342	38474550	32067154	32067186	1318015	33	1209	36.6364	-85.6342	-1.85856	-0.11957	0.419522	0.539092	0.0556841	hypo
1	142997833	142998507	1619198	1619222	140507	25	675	27	-85.4769	-2.30959	-0.21486	0.543135	0.757996	0.0581746	hypo
4	71063197	71063777	5930047	5930079	1579472	33	581	17.6061	-85.4024	-1.90017	-0.125318	0.645812	0.77113	0.0547868	hypo
6	108841641	108843238	9400265	9400306	1833551	42	1598	38.0476	85.3893	2.29919	0.122984	0.668853	0.545869	0.0548473	hyper
23	28127290	28128943	28661252	28661281	1150995	30	1654	55.1333	-85.376	-1.9215	-0.138206	0.495437	0.633643	0.0548145	hypo
1	81471534	81472782	911096	911120	80715	25	1249	49.96	-85.3605	-2.09514	-0.106804	0.653715	0.760519	0.0498546	hypo
28	43236048	43236885	32780500	32780531	1360187	32	838	26.1875	-85.3306	-2.22092	-0.125486	0.48659	0.612076	0.0505769	hypo
17	54587886	54588363	23091925	23091949	728634	25	478	19.12	-85.2464	-1.92578	-0.200367	0.316645	0.517012	0.0587192	hypo
15	33119207	33119872	20581177	20581210	567401	34	666	19.5882	-85.1994	-2.05903	-0.107159	0.0988439	0.206003	0.0537952	hypo
5	105628234	105628895	7895810	7895841	1719420	32	662	20.6875	85.1233	3.21339	0.160132	0.842142	0.68201	0.0538851	hyper
25	12867923	12868588	30259542	30259578	1225455	37	666	18	85.0729	2.44713	0.208579	0.947537	0.738957	0.0695694	hyper
23	24996258	24997390	28631406	28631439	1148727	34	1133	33.3235	-85.0292	-1.79684	-0.115758	0.515191	0.630949	0.0542547	hypo
12	14308426	14309430	16740312	16740346	342668	35	1005	28.7143	-85.0188	-1.8422	-0.100361	0.464977	0.565338	0.0537478	hypo
24	61244187	61245271	30023280	30023317	1216784	38	1085	28.5526	-85.0041	-1.87527	-0.123077	0.424373	0.547449	0.0521766	hypo
X	61313176	61313703	34128852	34128879	2189923	28	528	18.8571	-84.8668	-2.07936	-0.110781	0.341451	0.452232	0.05805	hypo
3	97510062	97510860	4705562	4705592	1495052	31	799	25.7742	-84.8297	-2.08867	-0.16054	0.531915	0.692455	0.0791906	hypo
21	32704555	32705361	26842802	26842824	1050327	23	807	35.087	-84.8149	-2.2159	-0.144949	0.484339	0.629288	0.0531434	hypo
11	61078538	61079530	15899054	15899079	294350	26	993	38.1923	-84.8083	-1.8362	-0.149556	0.455137	0.604694	0.0558035	hypo
11	69930877	69931264	16015113	16015139	302365	27	388	14.3704	-84.7865	-2.97703	-0.152316	0.148109	0.300425	0.0597424	hypo
7	54491741	54493230	10238095	10238135	1885669	41	1490	36.3415	84.7503	2.30598	0.103816	0.517888	0.414072	0.0505968	hyper
12	21828762	21829279	16860445	16860463	348212	19	518	27.2632	-84.7023	-2.75754	-0.230641	0.395133	0.625774	0.0590959	hypo
16	12427941	12428547	21433918	21433948	622733	31	607	19.5806	-84.6902	-2.00264	-0.145476	0.358301	0.503776	0.0620262	hypo
1	147052862	147053598	1680185	1680215	143348	31	737	23.7742	-84.5308	-1.99376	-0.166245	0.560378	0.726623	0.0558433	hypo
15	16053797	16054562	20345279	20345315	553206	37	766	20.7027	84.5096	2.87519	0.143613	0.675703	0.53209	0.0572687	hyper
3	119447203	119447588	5050570	5050595	1510589	26	386	14.8462	84.4047	4.3324	0.217023	0.507901	0.290878	0.0605057	hyper
24	57401455	57402249	29938235	29938268	1214701	34	795	23.3824	-84.3826	-1.93229	-0.11254	0.583219	0.695759	0.0547823	hypo
14	60149276	60149957	19837179	19837211	519133	33	682	20.6667	-84.379	-1.79115	-0.136528	0.430598	0.567127	0.0743186	hypo
5	113848467	113849477	8041237	8041272	1724241	36	1011	28.0833	84.2434	2.83713	0.109222	0.56524	0.456018	0.0514144	hyper
14	46164862	46165406	19682466	19682493	505273	28	545	19.4643	-84.1937	-1.91236	-0.219388	0.212205	0.431593	0.0753735	hypo
2	62964398	62965178	2615410	2615439	895210	30	781	26.0333	84.1482	3.22536	0.180895	0.812779	0.631884	0.0547934	hyper
26	3585558	3586470	30778474	30778505	1249106	32	913	28.5312	-83.9747	-1.80396	-0.163104	0.148669	0.311773	0.0559927	hypo
X	75980009	75980617	34266958	34266992	2205312	35	609	17.4	-83.9595	-1.8751	-0.118577	0.28455	0.403127	0.0511673	hypo
X	136907087	136907899	34997275	34997311	2261878	37	813	21.973	-83.9351	-1.99611	-0.105275	0.604905	0.71018	0.0610727	hypo
22	11393994	11394866	27528867	27528893	1090062	27	873	32.3333	-83.7494	-1.841	-0.124825	0.361597	0.486422	0.0506227	hypo
3	118129594	118130050	5031425	5031452	1509728	28	457	16.3214	83.7232	3.337	0.237536	0.778918	0.541382	0.0662611	hyper
13	13157208	13157966	17914459	17914482	415516	24	759	31.625	-83.7121	-2.21382	-0.150679	0.610723	0.761402	0.0512975	hypo
16	60816877	60817266	22067615	22067634	664703	20	390	19.5	-83.589	-2.03577	-0.195505	0.37096	0.566465	0.0499135	hypo
21	2895823	2896929	26409434	26409465	1026621	32	1107	34.5938	83.5327	2.92658	0.145533	0.649892	0.504358	0.0514617	hyper
9	103746982	103747758	13734673	13734701	2136112	29	777	26.7931	-83.4234	-1.79091	-0.107952	0.667555	0.775507	0.0526477	hypo
8	1289389	1290402	10974242	10974267	1938741	26	1014	39	83.3944	4.77189	0.215862	0.882401	0.66654	0.0516866	hyper
2	92529426	92531164	2935784	2935821	924931	38	1739	45.7632	83.3861	2.91272	0.211616	0.581561	0.369946	0.0592215	hyper
1	22267560	22268501	265796	265831	21048	36	942	26.1667	-83.336	-1.80709	-0.109522	0.214841	0.324363	0.0576798	hypo
13	16824373	16825603	17968992	17969025	418515	34	1231	36.2059	-83.2443	-1.83233	-0.134228	0.611122	0.74535	0.0528638	hypo
9	102642849	102643446	13711959	13711993	2135461	35	598	17.0857	-83.2411	-1.91631	-0.134725	0.563733	0.698458	0.0568711	hypo
22	59170875	59171531	28241096	28241125	1128038	30	657	21.9	83.1854	3.16829	0.174434	0.544706	0.370273	0.0591857	hyper
17	6965673	6966469	22494255	22494290	685307	36	797	22.1389	83.1751	2.58472	0.137163	0.719742	0.582578	0.0561932	hyper
28	9080521	9080892	32332340	32332369	1329933	30	372	12.4	-83.106	-2.12983	-0.14452	0.361406	0.505927	0.0570748	hypo
14	6033215	6034201	19112995	19113027	471293	33	987	29.9091	83.0019	2.82258	0.168602	0.660015	0.491413	0.0581668	hyper
27	16193656	16194702	31719131	31719163	1300588	33	1047	31.7273	82.8818	2.81738	0.167715	0.670179	0.502464	0.0556503	hyper
23	8353037	8353557	28381453	28381486	1136051	34	521	15.3235	-82.7966	-1.92518	-0.120768	0.614738	0.735506	0.0506469	hypo
22	10963271	10964276	27521613	27521649	1089770	37	1006	27.1892	82.6624	2.58278	0.119552	0.775326	0.655774	0.0502786	hyper
23	50833164	50833739	29051226	29051264	1167155	39	576	14.7692	-82.6244	-1.82731	-0.136451	0.572628	0.709079	0.0663205	hypo
X	103157344	103157870	34548527	34548555	2232261	29	527	18.1724	-82.5222	-2.05324	-0.111635	0.414991	0.526626	0.0481252	hypo
5	73204163	73205708	7493861	7493891	1689853	31	1546	49.871	-82.4885	-1.83086	-0.11111	0.51009	0.6212	0.0507483	hypo
3	115309230	115310250	4974162	4974200	1508263	39	1021	26.1795	82.444	2.2883	0.119501	0.874259	0.754758	0.05116	hyper
10	79368716	79369561	14743384	14743410	221501	27	846	31.3333	-82.4154	-1.83785	-0.142059	0.658556	0.800615	0.0501469	hypo
8	81542639	81543591	11950714	11950750	2014097	37	953	25.7568	-82.3538	-1.91249	-0.111605	0.535328	0.646933	0.0536861	hypo
2	110491279	110491904	3153863	3153897	941883	35	626	17.8857	-82.2385	-1.83485	-0.120178	0.0954623	0.21564	0.0534319	hypo
9	44099893	44100430	12931446	12931485	2082569	40	538	13.45	82.0379	2.15864	0.127809	0.815519	0.687709	0.0498335	hyper
12	54893474	54894740	17290488	17290511	377925	24	1267	52.7917	-81.9847	-2.1651	-0.137353	0.453193	0.590546	0.0497869	hypo
22	2749718	2750192	27390086	27390114	1083687	29	475	16.3793	81.9775	3.10282	0.153307	0.769739	0.616432	0.0552835	hyper
23	40140263	40140626	28830804	28830833	1161199	30	364	12.1333	-81.9695	-2.31088	-0.119361	0.582642	0.702002	0.0533322	hypo
19	21709000	21709879	24723735	24723764	805772	30	880	29.3333	-81.914	-1.80168	-0.137082	0.542814	0.679896	0.0549944	hypo
19	10809319	10810099	24546274	24546304	798053	31	781	25.1935	-81.8674	-1.913	-0.19263	0.404159	0.596789	0.0690952	hypo
26	47690807	47691245	31412212	31412252	1285076	41	439	10.7073	81.698	2.15131	0.115013	0.758325	0.643312	0.052375	hyper
12	51062232	51063324	17241648	17241671	374368	24	1093	45.5417	81.6969	4.45485	0.172894	0.701153	0.528258	0.0522847	hyper
3	65667442	65668081	4334044	4334064	1464169	21	640	30.4762	-81.6482	-2.39584	-0.163343	0.213098	0.376441	0.0525034	hypo
23	31562555	31563130	28704999	28705021	1153945	23	576	25.0435	-81.6462	-2.52512	-0.167618	0.611531	0.77915	0.0595908	hypo
19	60908539	60909112	25364050	25364083	831971	34	574	16.8824	-81.6161	-1.8258	-0.121084	0.676856	0.79794	0.070717	hypo
8	8855175	8856015	11073060	11073092	1945355	33	841	25.4848	-81.5031	-1.85164	-0.170839	0.56141	0.732249	0.07158	hypo
14	80351070	80351643	20133160	20133193	536008	34	574	16.8824	81.4398	2.77278	0.187657	0.681252	0.493594	0.0572025	hyper
8	83325025	83325758	11973945	11973973	2015737	29	734	25.3103	-81.406	-1.83157	-0.171857	0.528825	0.700682	0.057888	hypo
3	49239042	49239554	4156976	4157010	1447604	35	513	14.6571	-81.3615	-1.87708	-0.125543	0.208312	0.333854	0.0674054	hypo
5	94980388	94981334	7750841	7750869	1710683	29	947	32.6552	-81.3368	-2.23288	-0.136445	0.507469	0.643914	0.0502056	hypo
9	60034007	60034627	13095425	13095455	2099279	31	621	20.0323	-81.1949	-1.92225	-0.163248	0.475564	0.638812	0.0572815	hypo
6	84983980	84984616	9084594	9084625	1812431	32	637	19.9062	-81.1717	-1.95678	-0.120764	0.629336	0.7501	0.0642265	hypo
24	58309623	58310098	29960636	29960666	1215088	31	476	15.3548	81.1522	3.01199	0.131714	0.453855	0.322141	0.0517214	hyper
29	17305740	17306561	33063050	33063082	1377029	33	822	24.9091	-81.1408	-1.91118	-0.112664	0.396138	0.508803	0.052382	hypo
9	33326228	33327203	12795838	12795867	2072367	30	976	32.5333	-81.0978	-1.87857	-0.135416	0.664221	0.799637	0.0526716	hypo
X	133274186	133274652	34911935	34911964	2260502	30	467	15.5667	-81.084	-2.23194	-0.107679	0.464066	0.571745	0.0494055	hypo
24	55952167	55953008	29906497	29906527	1213997	31	842	27.1613	-81.0348	-1.81409	-0.19313	0.46186	0.65499	0.059994	hypo
5	114066637	114067670	8044669	8044703	1724379	35	1034	29.5429	81.0147	2.57588	0.144794	0.753463	0.608668	0.0541122	hyper
13	12064604	12065089	17894757	17894784	414740	28	486	17.3571	-80.9822	-2.00718	-0.116204	0.707003	0.823208	0.0516318	hypo
16	32440181	32441023	21688913	21688945	641043	33	843	25.5455	80.9443	2.71185	0.132958	0.656698	0.52374	0.049876	hyper
29	49742382	49742774	33535501	33535535	1401462	35	393	11.2286	80.8189	2.61312	0.130585	0.645546	0.514961	0.0574635	hyper
29	32140161	32140858	33260299	33260328	1389836	30	698	23.2667	80.7539	3.25353	0.122826	0.687794	0.564969	0.0528944	hyper
9	15002516	15003245	12572771	12572794	2054789	24	730	30.4167	-80.7491	-1.93867	-0.159519	0.422587	0.582106	0.0543606	hypo
27	27257971	27258473	31878460	31878488	1310099	29	503	17.3448	-80.7473	-1.91981	-0.12545	0.362254	0.487704	0.0686402	hypo
9	8591758	8592358	12488538	12488567	2049101	30	601	20.0333	-80.7467	-1.90625	-0.124611	0.485389	0.610001	0.0673132	hypo
2	124339981	124340280	3345682	3345705	953290	24	300	12.5	-80.7029	-1.95125	-0.189889	0.623639	0.813528	0.0598069	hypo
1	62877474	62877887	679504	679532	63413	29	414	14.2759	-80.6862	-2.23211	-0.136534	0.228073	0.364607	0.0564662	hypo
14	33771362	33772140	19527699	19527737	493486	39	779	19.9744	-80.6829	-1.80704	-0.108553	0.186796	0.29535	0.049801	hypo
14	29279743	29280207	19467133	19467172	489399	40	465	11.625	-80.6455	-1.80503	-0.113997	0.252939	0.366936	0.0734376	hypo
7	46586376	46587140	10132003	10132030	1878790	28	765	27.3214	-80.5351	-1.83753	-0.14331	0.546062	0.689373	0.0557816	hypo
25	34952321	34952958	30612433	30612464	1241214	32	638	19.9375	-80.2977	-1.86272	-0.147195	0.511173	0.658368	0.0563268	hypo
13	77771913	77772681	18894034	18894065	464666	32	769	24.0312	80.2819	3.05136	0.16263	0.753557	0.590927	0.0604173	hyper
22	10402074	10402541	27511347	27511376	1089431	30	468	15.6	-80.2301	-2.31391	-0.128665	0.548067	0.676731	0.0486288	hypo
2	70919562	70920216	2700485	2700511	903402	27	655	24.2593	-80.2283	-2.77368	-0.126532	0.198563	0.325096	0.0513613	hypo
6	104678187	104679871	9345769	9345808	1829940	40	1685	42.125	-80.1713	-1.85546	-0.104032	0.797571	0.901603	0.0505606	hypo
10	103153887	103154285	15119399	15119426	239531	28	399	14.25	-80.1654	-2.53306	-0.152051	0.537801	0.689853	0.0627256	hypo
13	81012358	81012757	18969855	18969890	466088	36	400	11.1111	80.135	2.39281	0.184628	0.865918	0.68129	0.0610046	hyper
26	22247625	22248300	31019286	31019316	1265937	31	676	21.8065	-80.1293	-1.9119	-0.15635	0.647039	0.803389	0.0541766	hypo
14	8738795	8739308	19160685	19160708	473035	24	514	21.4167	-80.0097	-2.40837	-0.141849	0.124193	0.266041	0.0510038	hypo
22	1652988	1653878	27372426	27372456	1082848	31	891	28.7419	80.0006	2.94188	0.190173	0.773678	0.583506	0.064394	hyper
27	40376520	40377044	32104254	32104283	1319176	30	525	17.5	-79.9201	-1.86468	-0.11795	0.335763	0.453714	0.0582329	hypo
9	19239577	19239992	12622315	12622338	2058876	24	416	17.3333	-79.9161	-2.82504	-0.16288	0.403434	0.566314	0.0562948	hypo
23	33520798	33521526	28734966	28734987	1155626	22	729	33.1364	-79.8451	-2.02495	-0.135316	0.295526	0.430842	0.0501962	hypo
27	39498915	39499936	32087439	32087466	1318631	28	1022	36.5	79.8412	3.33083	0.208375	0.635181	0.426805	0.0692981	hyper
26	38880699	38881548	31247510	31247537	1279952	28	850	30.3571	-79.7315	-1.90322	-0.118838	0.221887	0.340725	0.0536492	hypo
29	46345186	46346039	33479609	33479635	1399687	27	854	31.6296	-79.6702	-1.9017	-0.138225	0.501683	0.639907	0.0593402	hypo
15	33118157	33118641	20581153	20581176	567400	24	485	20.2083	-79.6493	-2.16509	-0.15023	0.210396	0.360627	0.0528241	hypo
23	48832483	48833418	29003891	29003922	1166228	32	936	29.25	79.5504	4.16425	0.155764	0.665717	0.509953	0.0528832	hyper
4	118084836	118085223	6567922	6567959	1619742	38	388	10.2105	-79.5198	-1.84793	-0.114067	0.369549	0.483616	0.0603647	hypo
1	3613977	3614908	61953	61987	2408	35	932	26.6286	-79.5087	-1.9055	-0.102266	0.584704	0.68697	0.0608874	hypo
9	85816400	85816995	13414865	13414893	2123889	29	596	20.5517	-79.4289	-1.82205	-0.114252	0.617116	0.731369	0.0495868	hypo
13	78431356	78431838	18907840	18907872	464982	33	483	14.6364	-79.4019	-1.96763	-0.129783	0.381918	0.511701	0.0587997	hypo
27	38351250	38351805	32064495	32064522	1317956	28	556	19.8571	79.3983	3.64155	0.240222	0.813697	0.573475	0.0729304	hyper
23	50757123	50757707	29049420	29049443	1167120	24	585	24.375	79.3497	4.10628	0.18694	0.786528	0.599588	0.0536617	hyper
25	34985180	34985584	30613210	30613244	1241228	35	405	11.5714	-79.3272	-1.8113	-0.164356	0.621873	0.786229	0.0759218	hypo
1	148487219	148487865	1703098	1703122	144383	25	647	25.88	-79.3081	-2.08622	-0.127206	0.592836	0.720042	0.0649334	hypo
27	38274825	38275524	32062695	32062727	1317920	33	700	21.2121	79.2797	2.80898	0.115752	0.840641	0.724889	0.0531311	hyper
17	62965953	62966530	23229508	23229535	734422	28	578	20.6429	79.173	3.62749	0.160104	0.640825	0.48072	0.0598009	hyper
16	77770431	77771029	22341208	22341228	677456	21	599	28.5238	79.1593	5.61463	0.270041	0.876871	0.60683	0.0632819	hyper
29	36319482	36320190	33333681	33333710	1392443	30	709	23.6333	79.0719	3.22602	0.179874	0.861274	0.6814	0.0576485	hyper
15	80591262	80591839	21204327	21204363	608720	37	578	15.6216	79.058	2.35663	0.143078	0.659333	0.516255	0.0519599	hyper
16	24347974	24348628	21572984	21573020	634342	37	655	17.7027	-79.0192	-1.79151	-0.144742	0.212967	0.357709	0.0648662	hypo
5	116428516	116429419	8088992	8089024	1725665	33	904	27.3939	-78.9636	-1.82777	-0.11054	0.537887	0.648427	0.059699	hypo
15	83634284	83634847	21262262	21262285	610587	24	564	23.5	-78.959	-1.98414	-0.19167	0.407358	0.599028	0.0588295	hypo
8	110016121	110016722	12344555	12344581	2038376	27	602	22.2963	-78.8838	-2.01338	-0.104484	0.273779	0.378262	0.0508286	hypo
18	36299066	36300003	23959543	23959573	767565	31	938	30.2581	-78.864	-1.80295	-0.13591	0.657513	0.793423	0.0565989	hypo
20	58695265	58695731	26159246	26159269	1014786	24	467	19.4583	-78.8489	-2.14589	-0.174921	0.591709	0.766629	0.0586651	hypo
7	15398850	15399739	9747764	9747792	1851218	29	890	30.6897	78.7563	3.19727	0.17521	0.778957	0.603747	0.0515595	hyper
25	2852165	2852728	30084141	30084163	1219182	23	564	24.5217	-78.6757	-1.9137	-0.25762	0.170473	0.428092	0.0719768	hypo
18	13457051	13457518	23649704	23649734	748373	31	468	15.0968	-78.6607	-1.81135	-0.13088	0.416044	0.546925	0.0563263	hypo
23	18872091	18872644	28548421	28548455	1143485	35	554	15.8286	-78.6406	-1.79655	-0.149066	0.591856	0.740922	0.0625945	hypo
12	74199631	74200178	17477274	17477303	396519	30	548	18.2667	-78.627	-2.22375	-0.108863	0.174965	0.283829	0.0531564	hypo
16	77066828	77067637	22325806	22325834	677082	29	810	27.931	-78.5266	-1.93844	-0.179342	0.464357	0.643699	0.0648239	hypo
17	68197778	68198606	23330967	23330992	737360	26	829	31.8846	-78.412	-2.04257	-0.172164	0.670564	0.842728	0.0554058	hypo
25	41076703	41077300	30726765	30726798	1244734	34	598	17.5882	78.3947	2.48341	0.123374	0.815742	0.692368	0.0666393	hyper
24	59733792	59734197	29988980	29989009	1215967	30	406	13.5333	-78.3554	-1.90357	-0.102905	0.341965	0.44487	0.0544811	hypo
12	73097809	73099202	17461902	17461926	395586	25	1394	55.76	-78.3274	-1.83663	-0.179005	0.32952	0.508525	0.0546937	hypo
11	60841018	60841957	15896106	15896131	294131	26	940	36.1538	-78.3102	-2.16459	-0.177622	0.634373	0.811995	0.0595689	hypo
2	133235297	133236110	3497135	3497162	958934	28	814	29.0714	78.2459	3.49488	0.100681	0.705327	0.604646	0.0519156	hyper
23	49224041	49225132	29013481	29013504	1166386	24	1092	45.5	78.2263	4.53567	0.220089	0.843098	0.623009	0.0565746	hyper
2	37351779	37352616	2337683	2337706	868993	24	838	34.9167	-78.1551	-2.15574	-0.141871	0.498101	0.639972	0.0553458	hypo
25	34614718	34615346	30605377	30605401	1241039	25	629	25.16	-78.1303	-1.84299	-0.13705	0.507095	0.644146	0.0499858	hypo
8	97835156	97836008	12148424	12148444	2029255	21	853	40.619	78.1018	4.14678	0.261386	0.657729	0.396342	0.0554378	hyper
12	68803532	68804424	17429989	17430012	392511	24	893	37.2083	-78.1003	-1.82876	-0.12556	0.552547	0.678107	0.0514819	hypo
25	24815305	24816061	30439306	30439339	1234648	34	757	22.2647	78.0982	2.61422	0.144386	0.721298	0.576912	0.0542348	hyper
24	4193360	4194149	29171099	29171136	1170576	38	790	20.7895	78.0645	2.31485	0.183145	0.877861	0.694716	0.0846216	hyper
14	2756618	2757002	19056428	19056466	469116	39	385	9.87179	-78.0153	-1.80768	-0.117836	0.624945	0.742782	0.055634	hypo
8	98600164	98600800	12158854	12158876	2029948	23	637	27.6957	-77.9596	-2.17981	-0.203728	0.438416	0.642144	0.0639395	hypo
11	73127310	73128149	16058887	16058911	305019	25	840	33.6	77.9282	3.5493	0.19877	0.81492	0.61615	0.0523545	hyper
16	75294533	75294824	22292571	22292602	675850	32	292	9.125	77.9206	2.63226	0.150783	0.830826	0.680044	0.0498849	hyper
14	35665541	35666310	19553737	19553764	495189	28	770	27.5	-77.9179	-1.84744	-0.129642	0.254582	0.384224	0.059888	hypo
21	14298634	14299358	26567952	26567975	1036377	24	725	30.2083	-77.8873	-1.99711	-0.126327	0.524502	0.650828	0.0507726	hypo
9	15575308	15576278	12580875	12580906	2055275	32	971	30.3438	-77.8673	-1.85154	-0.122049	0.511736	0.633785	0.061391	hypo
1	108808257	108808726	1211087	1211120	108057	34	470	13.8235	-77.8512	-1.82879	-0.116529	0.434191	0.550721	0.0521938	hypo
6	20812360	20813277	8391620	8391658	1747876	39	918	23.5385	77.8329	2.14904	0.114498	0.491132	0.376635	0.0526235	hyper
2	77522529	77523184	2772231	2772259	909831	29	656	22.6207	-77.8207	-2.20699	-0.111207	0.418475	0.529682	0.0573552	hypo
15	81484370	81485171	21222686	21222719	609191	34	802	23.5882	77.7512	2.44436	0.140179	0.740667	0.600488	0.0542011	hyper
2	121517999	121518663	3302914	3302948	951239	35	665	19	-77.7406	-1.79138	-0.12705	0.31081	0.43786	0.0586327	hypo
25	32073078	32074516	30559743	30559781	1239637	39	1439	36.8974	77.7361	2.16849	0.186071	0.708459	0.522387	0.0606216	hyper
16	49671642	49672239	21919258	21919286	655472	29	598	20.6207	-77.7146	-1.92434	-0.129836	0.651479	0.781314	0.0548636	hypo
27	26493485	26494581	31865284	31865314	1309549	31	1097	35.3871	77.7133	2.89649	0.171477	0.563949	0.392471	0.0606006	hyper
22	59261295	59261609	28243309	28243339	1128079	31	315	10.1613	-77.6526	-1.80763	-0.117064	0.481892	0.598955	0.0512189	hypo
22	51802493	51803219	28104821	28104852	1123692	32	727	22.7188	77.6509	2.57253	0.124938	0.726018	0.60108	0.0491419	hyper
17	61369475	61370065	23204077	23204108	733273	32	591	18.4688	-77.6311	-1.94188	-0.129207	0.480055	0.609262	0.059453	hypo
11	75315063	75315850	16089064	16089096	306889	33	788	23.8788	-77.5554	-1.86644	-0.113774	0.389345	0.503119	0.0558111	hypo
1	139087529	139088869	1562765	1562798	137469	34	1341	39.4412	77.5299	2.60043	0.132574	0.594351	0.461777	0.0496915	hyper
16	80823807	80824361	22398053	22398077	679104	25	555	22.2	77.5028	3.28136	0.175314	0.667919	0.492605	0.0503375	hyper
13	76883154	76883821	18875589	18875617	464213	29	668	23.0345	77.4946	3.21128	0.138897	0.805608	0.666711	0.0507919	hyper
7	71562277	71562554	10445329	10445348	1901673	20	278	13.9	-77.4589	-2.89062	-0.211844	0.323353	0.535197	0.056041	hypo
3	120660723	120661504	5067609	5067643	1511200	35	782	22.3429	77.4488	2.5885	0.128292	0.746521	0.618229	0.0585399	hyper
14	44232888	44233517	19656672	19656700	503519	29	630	21.7241	-77.4299	-1.99526	-0.160453	0.499031	0.659485	0.0536881	hypo
9	94892493	94893187	13556036	13556066	2130885	31	695	22.4194	-77.1291	-2.00351	-0.13653	0.353234	0.489764	0.0551801	hypo
9	80967861	80968786	13352168	13352195	2119471	28	926	33.0714	-77.1173	-2.27787	-0.159254	0.55393	0.713184	0.055336	hypo
11	89056595	89057267	16285582	16285611	317823	30	673	22.4333	-77.0906	-1.85635	-0.155078	0.445591	0.600669	0.0618102	hypo
5	68173551	68174066	7424856	7424881	1685622	26	516	19.8462	76.896	3.13057	0.180848	0.807681	0.626833	0.0546933	hyper
X	136372829	136373447	34984321	34984352	2261685	32	619	19.3438	76.7627	2.61202	0.108743	0.776806	0.668064	0.0449501	hyper
X	76848763	76849425	34275175	34275206	2206260	32	663	20.7188	-76.686	-1.95322	-0.111148	0.200359	0.311506	0.0505533	hypo
16	2617140	2618251	21324073	21324107	613393	35	1112	31.7714	76.6735	2.45904	0.121655	0.684398	0.562743	0.0634382	hyper
8	76060800	76061198	11883210	11883239	2008865	30	399	13.3	-76.6565	-1.80746	-0.140582	0.522985	0.663567	0.0792934	hypo
18	63522063	63522889	24372030	24372062	786879	33	827	25.0606	-76.6265	-1.84677	-0.143676	0.459554	0.60323	0.0595484	hypo
24	20725889	20726615	29366000	29366024	1186459	25	727	29.08	-76.6178	-2.06732	-0.114494	0.467384	0.581878	0.0551423	hypo
6	57438957	57440086	8784475	8784507	1784937	33	1130	34.2424	76.5644	2.73128	0.110651	0.866775	0.756124	0.05629	hyper
20	39873318	39873851	25957839	25957875	996075	37	534	14.4324	-76.5195	-1.87368	-0.103809	0.137571	0.24138	0.0644404	hypo
15	22146282	22146776	20411103	20411128	559325	26	495	19.0385	-76.4271	-2.10698	-0.120528	0.576695	0.697223	0.0514132	hypo
4	68870622	68871012	5899971	5900006	1577538	36	391	10.8611	-76.2645	-1.80713	-0.159611	0.0661861	0.225797	0.0625626	hypo
22	55843906	55844459	28179407	28179438	1126095	32	554	17.3125	-76.2594	-2.08222	-0.125327	0.59773	0.723057	0.0601094	hypo
2	114827351	114827900	3208563	3208589	945886	27	550	20.3704	-76.2357	-2.13128	-0.109178	0.132942	0.24212	0.0614811	hypo
1	152320647	152321792	1772873	1772902	146785	30	1146	38.2	-76.2273	-1.81657	-0.111397	0.705144	0.816541	0.0593594	hypo
16	26107381	26108162	21595091	21595115	635955	25	782	31.28	-76.1963	-2.03924	-0.136511	0.682922	0.819433	0.0499434	hypo
13	78267698	78268238	18904552	18904571	464906	20	541	27.05	-76.1083	-1.82723	-0.194691	0.434198	0.628889	0.0657187	hypo
2	5731595	5732025	1951768	1951789	838416	22	431	19.5909	76.108	3.9432	0.20669	0.796289	0.589599	0.0503628	hyper
4	92423727	92424522	6176741	6176770	1600107	30	796	26.5333	-75.9762	-1.84829	-0.122118	0.245107	0.367225	0.0509982	hypo
22	6949206	6949786	27459109	27459140	1086753	32	581	18.1562	75.9568	2.65886	0.155592	0.574767	0.419175	0.0626122	hyper
21	30254045	30255038	26808935	26808963	1048278	29	994	34.2759	-75.9103	-1.86469	-0.142054	0.336075	0.47813	0.0693282	hypo
4	116973942	116974709	6544148	6544173	1619162	26	768	29.5385	-75.9019	-1.86949	-0.144721	0.568056	0.712777	0.0625327	hypo
5	53179654	53180047	7249079	7249108	1671272	30	394	13.1333	-75.8802	-1.87565	-0.115904	0.317049	0.432953	0.0536909	hypo
19	25161955	25162431	24780730	24780749	808056	20	477	23.85	-75.8627	-1.90621	-0.192635	0.361742	0.554377	0.0516121	hypo
24	21665750	21666578	29380232	29380257	1187199	26	829	31.8846	-75.7302	-1.94179	-0.129172	0.415468	0.54464	0.0575009	hypo
13	69890529	69892145	18756101	18756128	459775	28	1617	57.75	75.7235	3.41588	0.140656	0.788839	0.648183	0.0493823	hyper
4	100593721	100594334	6294695	6294725	1606734	31	614	19.8065	-75.6964	-1.81888	-0.129854	0.181472	0.311327	0.0659659	hypo
1	79986474	79988432	891230	891262	79417	33	1959	59.3636	75.6847	2.95546	0.18909	0.8634	0.67431	0.0542013	hyper
20	58988592	58989319	26166276	26166300	1014920	25	728	29.12	75.6661	3.62741	0.167794	0.791876	0.624082	0.0541712	hyper
X	138890364	138891049	35039508	35039536	2262784	29	686	23.6552	-75.6507	-1.92253	-0.11919	0.602551	0.721742	0.0462064	hypo
23	27499341	27500375	28653399	28653418	1150515	20	1035	51.75	-75.5966	-2.22116	-0.194706	0.698978	0.893684	0.0519158	hypo
4	119830082	119830909	6602158	6602192	1620780	35	828	23.6571	-75.5926	-1.79965	-0.139615	0.488458	0.628073	0.0722816	hypo
22	6831579	6832476	27456719	27456743	1086683	25	898	35.92	-75.567	-1.86881	-0.16999	0.500376	0.670367	0.0514512	hypo
16	20601770	20602104	21522307	21522335	630981	29	335	11.5517	75.5592	2.96605	0.167555	0.5193	0.351745	0.0605582	hyper
23	17640684	17641574	28528647	28528671	1142595	25	891	35.64	-75.5435	-1.82595	-0.116278	0.521618	0.637896	0.0504731	hypo
9	33565011	33565958	12799474	12799501	2072565	28	948	33.8571	-75.5124	-1.80593	-0.112226	0.615467	0.727694	0.0555431	hypo
1	10858679	10859475	155570	155595	8888	26	797	30.6538	75.4783	3.22796	0.223085	0.525576	0.302491	0.0629183	hyper
23	3691263	3691602	28313524	28313555	1132291	32	340	10.625	-75.4185	-2.09105	-0.110999	0.448362	0.559361	0.0632063	hypo
23	45478877	45479518	28935685	28935718	1164292	34	642	18.8824	75.3288	2.36155	0.122008	0.820237	0.698229	0.0508032	hyper
12	16544588	16545237	16779513	16779545	344145	33	650	19.697	75.3225	2.4787	0.164099	0.765931	0.601831	0.05718	hyper
6	56608578	56609177	8772112	8772146	1784260	35	600	17.1429	-75.1763	-1.7926	-0.125482	0.164345	0.289827	0.0670437	hypo
16	50877476	50877805	21934759	21934783	656303	25	330	13.2	-75.1311	-1.84516	-0.156572	0.609337	0.765909	0.0510321	hypo
19	7918275	7918921	24498429	24498462	795973	34	647	19.0294	-75.1032	-1.80332	-0.123152	0.52494	0.648093	0.0621508	hypo
9	13083503	13084010	12549326	12549347	2052983	22	508	23.0909	75.0993	4.07327	0.176369	0.567974	0.391606	0.051292	hyper
22	21541747	21542440	27678486	27678515	1098163	30	694	23.1333	-75.0878	-1.82123	-0.139617	0.638568	0.778185	0.0559856	hypo
27	33654397	33654885	31980390	31980415	1314953	26	489	18.8077	-75.0664	-2.72885	-0.119427	0.517163	0.63659	0.0491379	hypo
8	102647448	102648326	12221102	12221135	2033191	34	879	25.8529	75.0125	2.36303	0.149175	0.500127	0.350952	0.0690534	hyper
1	139013382	139014287	1561932	1561963	137398	32	906	28.3125	74.9881	2.54393	0.146226	0.779562	0.633336	0.0534032	hyper
3	111720717	111721602	4908456	4908484	1506151	29	886	30.5517	74.9646	2.97714	0.168985	0.754818	0.585833	0.0503001	hyper
19	44941452	44942314	25084534	25084551	822192	18	863	47.9444	-74.8737	-2.07497	-0.206889	0.263624	0.470513	0.053552	hypo
3	48612133	48612568	4148111	4148146	1447075	36	436	12.1111	-74.8333	-1.79905	-0.100369	0.338877	0.439246	0.0577272	hypo
8	27762509	27762987	11307853	11307871	1963084	19	479	25.2105	-74.7914	-3.49517	-0.117868	0.607931	0.725799	0.0520109	hypo
8	73638321	73639182	11849641	11849666	2006827	26	862	33.1538	-74.7873	-2.21429	-0.148987	0.398716	0.547703	0.0526106	hypo
10	58382754	58383133	14482540	14482564	201652	25	380	15.2	-74.7441	-2.70785	-0.12496	0.50953	0.63449	0.049659	hypo
1	10848348	10849129	155396	155421	8883	26	782	30.0769	-74.7238	-2.0127	-0.137332	0.336584	0.473915	0.0610741	hypo
4	93393451	93394297	6189753	6189775	1600882	23	847	36.8261	-74.6881	-2.45035	-0.16098	0.385336	0.546316	0.0580962	hypo
17	66859197	66859767	23309053	23309083	736402	31	571	18.4194	-74.6785	-1.99972	-0.111421	0.565142	0.676564	0.0529039	hypo
15	22770093	22770623	20420065	20420084	559836	20	531	26.55	-74.6416	-1.99222	-0.123503	0.572074	0.695578	0.0512412	hypo
4	119692488	119693026	6599612	6599639	1620675	28	539	19.25	74.5645	2.92112	0.153688	0.690107	0.536418	0.0575777	hyper
29	5981914	5982719	32909540	32909569	1367129	30	806	26.8667	-74.5562	-1.86791	-0.12155	0.678642	0.800193	0.0529584	hypo
3	111254045	111254855	4901685	4901709	1505810	25	811	32.44	-74.5516	-2.12094	-0.166475	0.428841	0.595316	0.069715	hypo
24	48065477	48066567	29774384	29774412	1208364	29	1091	37.6207	-74.5371	-1.92337	-0.104019	0.142476	0.246495	0.0572365	hypo
4	94673347	94673767	6207642	6207672	1601920	31	421	13.5806	-74.4217	-1.86749	-0.157371	0.515164	0.672535	0.0645451	hypo
19	49097119	49097873	25147273	25147302	825368	30	755	25.1667	-74.4144	-1.9721	-0.134145	0.707835	0.84198	0.0512499	hypo
15	81838666	81839453	21227713	21227743	609460	31	788	25.4194	-74.3736	-1.95252	-0.12191	0.328829	0.450739	0.0539919	hypo
16	40833017	40834004	21788631	21788666	649233	36	988	27.4444	74.3179	2.13962	0.125505	0.576383	0.450878	0.0502364	hyper
23	19623495	19624462	28561061	28561092	1143993	32	968	30.25	-74.3129	-1.83251	-0.125723	0.658307	0.78403	0.0629933	hypo
12	76441631	76442392	17521492	17521523	397806	32	762	23.8125	-74.298	-1.95461	-0.120841	0.49087	0.611711	0.0640943	hypo
13	79699620	79700395	18937429	18937456	465550	28	776	27.7143	-74.155	-1.82524	-0.118445	0.346663	0.465108	0.0491307	hypo
3	118496968	118497485	5038028	5038060	1509944	33	518	15.697	74.1195	2.50781	0.138194	0.721895	0.583701	0.0564491	hyper
21	12605705	12606244	26540296	26540325	1035123	30	540	18	-74.0872	-2.01077	-0.121302	0.660471	0.781773	0.0548642	hypo
16	24364861	24365346	21573436	21573466	634352	31	486	15.6774	-73.9517	-1.82952	-0.158566	0.166606	0.325173	0.0506371	hypo
10	27399714	27400268	14112925	14112944	171955	20	555	27.75	-73.9502	-1.8961	-0.169725	0.455043	0.624768	0.0544883	hypo
9	88130765	88131338	13450147	13450169	2125612	23	574	24.9565	-73.9477	-2.1659	-0.14758	0.423574	0.571153	0.0506514	hypo
17	59589654	59590919	23171361	23171384	732250	24	1266	52.75	73.9174	3.70741	0.209451	0.52673	0.317278	0.0521219	hyper
1	89480271	89480981	1005297	1005316	88335	20	711	35.55	-73.8832	-3.28889	-0.236188	0.577763	0.813951	0.0605744	hypo
26	18757107	18757701	30971465	30971494	1262984	30	595	19.8333	-73.8811	-1.83584	-0.128264	0.507493	0.635757	0.0594998	hypo
12	12441028	12441851	16707458	16707483	341438	26	824	31.6923	-73.8694	-1.7954	-0.184238	0.573324	0.757562	0.0671971	hypo
13	61785816	61786496	18630378	18630402	453966	25	681	27.24	-73.8182	-2.0074	-0.146276	0.486268	0.632544	0.0514082	hypo
4	3423567	3424220	5104200	5104227	1514753	28	654	23.3571	-73.8078	-2.10982	-0.168134	0.339828	0.507962	0.0741799	hypo
18	6563860	6564561	23522360	23522392	744300	33	702	21.2727	73.7878	2.47597	0.114623	0.657784	0.543161	0.0593139	hyper
10	87482071	87482652	14870599	14870624	227484	26	582	22.3846	73.7356	3.21046	0.149967	0.833892	0.683925	0.0495191	hyper
11	56579272	56580114	15855162	15855185	289632	24	843	35.125	-73.7054	-2.16372	-0.121994	0.270005	0.391999	0.0531599	hypo
6	91395469	91396374	9159370	9159396	1818803	27	906	33.5556	73.6946	3.42886	0.190873	0.65176	0.460887	0.0578191	hyper
17	49799600	49800163	23011026	23011062	725386	37	564	15.2432	-73.6448	-1.79866	-0.121741	0.390012	0.511753	0.0768255	hypo
5	115514231	115514902	8072233	8072259	1725188	27	672	24.8889	-73.6257	-1.87101	-0.132898	0.517011	0.64991	0.0567324	hypo
13	13208067	13209035	17915475	17915502	415547	28	969	34.6071	-73.5029	-1.9447	-0.108995	0.67134	0.780335	0.0512477	hypo
11	88766090	88766744	16280268	16280299	317658	32	655	20.4688	-73.4747	-1.86153	-0.142237	0.459981	0.602218	0.0669449	hypo
14	10348619	10349087	19187127	19187161	474110	35	469	13.4	73.4673	2.29294	0.147558	0.671453	0.523895	0.0719657	hyper
10	92374405	92375354	14948065	14948099	231112	35	950	27.1429	73.4613	2.24606	0.149101	0.707817	0.558716	0.0494654	hyper
3	26281235	26282092	3890147	3890172	1425351	26	858	33	-73.4359	-2.12063	-0.121955	0.586633	0.708588	0.0528066	hypo
5	10284002	10284607	6735181	6735209	1630594	29	606	20.8966	-73.4307	-1.87853	-0.124312	0.308075	0.432387	0.0514184	hypo
5	119060820	119061690	8137096	8137122	1727132	27	871	32.2593	73.4216	3.28115	0.19214	0.616067	0.423927	0.0520046	hyper
6	101933248	101934318	9302139	9302167	1828049	29	1071	36.931	-73.4093	-1.79406	-0.140056	0.657595	0.797651	0.0592634	hypo
22	52991072	52991943	28123572	28123594	1124516	23	872	37.913	-73.3997	-1.86461	-0.16536	0.482681	0.648041	0.0530377	hypo
22	53564848	53565464	28133712	28133739	1124903	28	617	22.0357	73.3394	2.9313	0.141111	0.78627	0.64516	0.0524324	hyper
26	17711674	17712299	30954678	30954704	1262228	27	626	23.1852	-73.3324	-1.83236	-0.130151	0.0966388	0.22679	0.0693935	hypo
3	101422544	101423048	4757183	4757215	1498367	33	505	15.303	73.2946	2.35549	0.199876	0.66959	0.469713	0.0575315	hyper
5	68538777	68539541	7430148	7430171	1685925	24	765	31.875	-73.2724	-1.90636	-0.155755	0.715433	0.871188	0.0512113	hypo
21	68258622	68259230	27330390	27330415	1080542	26	609	23.4231	-73.2633	-1.90436	-0.141173	0.616385	0.757558	0.0503581	hypo
5	111128041	111128518	7992950	7992977	1722591	28	478	17.0714	73.26	2.954	0.175651	0.771089	0.595438	0.0569986	hyper
21	56128922	56129708	27119554	27119575	1072862	22	787	35.7727	73.219	4.10728	0.194993	0.793512	0.598519	0.0594761	hyper
12	75514259	75514634	17502583	17502607	397298	25	376	15.04	-73.2108	-2.07592	-0.192898	0.517906	0.710804	0.066923	hypo
5	113171977	113172723	8029354	8029388	1723830	35	747	21.3429	-73.2092	-1.83541	-0.106282	0.632397	0.73868	0.0559837	hypo
19	15838104	15838697	24628723	24628751	801735	29	594	20.4828	-73.2021	-2.11417	-0.108021	0.514212	0.622233	0.0555145	hypo
8	8529845	8530401	11067220	11067240	1945169	21	557	26.5238	-73.161	-2.23305	-0.196838	0.549962	0.746801	0.0565173	hypo
18	4570210	4570639	23475345	23475370	743459	26	430	16.5385	-73.1502	-2.59619	-0.109766	0.515831	0.625597	0.0528463	hypo
9	75389357	75389879	13285522	13285548	2114085	27	523	19.3704	-73.1496	-1.81487	-0.138364	0.219529	0.357894	0.0551491	hypo
11	101003658	101004387	16472190	16472216	326328	27	730	27.037	-73.1372	-1.84563	-0.145343	0.624616	0.769959	0.0527813	hypo
5	70580143	70580811	7457418	7457442	1687726	25	669	26.76	-73.0727	-1.99281	-0.134646	0.589683	0.724328	0.050749	hypo
24	2002002	2002458	29125270	29125299	1169336	30	457	15.2333	-73.0501	-1.80437	-0.12192	0.248079	0.369998	0.0569676	hypo
23	18148430	18149045	28536993	28537020	1142928	28	616	22	-73.0147	-1.86828	-0.193807	0.341604	0.535411	0.0745103	hypo
12	10779593	10780598	16677958	16677984	340302	27	1006	37.2593	73.0079	3.13847	0.169041	0.806988	0.637946	0.0559457	hyper
22	6735922	6736933	27454483	27454509	1086647	27	1012	37.4815	73.0034	4.68087	0.157561	0.707912	0.550351	0.0495946	hyper
12	11634784	11635552	16693395	16693416	340880	22	769	34.9545	-72.992	-2.15807	-0.164881	0.58844	0.753321	0.0582063	hypo
X	133509587	133510165	34917620	34917647	2260589	28	579	20.6786	-72.9908	-1.88858	-0.106504	0.627823	0.734327	0.056404	hypo
12	20094116	20094799	16831495	16831521	347114	27	684	25.3333	72.9899	3.21332	0.15163	0.675969	0.524339	0.0496652	hyper
3	118429249	118429899	5036482	5036519	1509909	38	651	17.1316	72.9891	2.12611	0.117122	0.571425	0.454303	0.0608688	hyper
2	115082752	115083916	3212381	3212410	946082	30	1165	38.8333	-72.9889	-1.81406	-0.129109	0.63338	0.762488	0.0621766	hypo
16	42017830	42018293	21806641	21806666	650109	26	464	17.8462	-72.9578	-1.83594	-0.115674	0.769556	0.88523	0.0486808	hypo
3	109480906	109481459	4876774	4876800	1504336	27	554	20.5185	-72.9489	-1.84857	-0.125605	0.455084	0.58069	0.0538357	hypo
21	69096924	69097398	27344353	27344390	1080950	38	475	12.5	72.9469	2.03819	0.123057	0.609686	0.486629	0.0642183	hyper
19	59688452	59688777	25337505	25337526	831339	22	326	14.8182	-72.944	-1.88506	-0.128295	0.348906	0.477201	0.0543981	hypo
23	50189537	50190291	29037770	29037797	1166805	28	755	26.9643	72.9116	2.99315	0.156379	0.771089	0.61471	0.0585418	hyper
19	25243019	25243809	24782134	24782164	808109	31	791	25.5161	-72.8813	-1.93072	-0.147875	0.554524	0.702399	0.0640894	hypo
14	80849049	80849391	20142338	20142370	536382	33	343	10.3939	-72.853	-1.84897	-0.122656	0.38728	0.509936	0.070794	hypo
23	33333787	33334344	28732025	28732048	1155484	24	558	23.25	72.8112	3.38737	0.199363	0.654784	0.45542	0.0534606	hyper
4	49174385	49174635	5664787	5664805	1558460	19	251	13.2105	72.7881	4.0268	0.244607	0.538153	0.293546	0.0555816	hyper
18	56746180	56746674	24273056	24273078	782332	23	495	21.5217	-72.7675	-2.63286	-0.167549	0.221452	0.389002	0.0613871	hypo
12	76826622	76827282	17529285	17529316	398028	32	661	20.6562	72.754	2.76054	0.140785	0.834574	0.693789	0.0587741	hyper
9	33317874	33319662	12795703	12795732	2072361	30	1789	59.6333	72.7446	2.80188	0.158406	0.841469	0.683063	0.0597122	hyper
18	39940179	39940632	24012090	24012119	770636	30	454	15.1333	-72.6608	-1.97077	-0.126878	0.511135	0.638014	0.0608267	hypo
13	77719204	77720226	18892706	18892733	464642	28	1023	36.5357	72.6433	3.0702	0.141276	0.586775	0.445498	0.0492674	hyper
6	99291569	99292110	9267887	9267919	1825704	33	542	16.4242	-72.5636	-1.84615	-0.126451	0.13433	0.26078	0.0668619	hypo
20	4200600	4201145	25490418	25490443	963488	26	546	21	-72.5411	-1.9118	-0.121575	0.409088	0.530663	0.0507893	hypo
24	58202492	58203045	29957901	29957932	1215042	32	554	17.3125	-72.5182	-1.94687	-0.123204	0.241026	0.36423	0.0597514	hypo
26	17192969	17194538	30947916	30947946	1261743	31	1570	50.6452	-72.5124	-1.794	-0.114532	0.705164	0.819696	0.0514209	hypo
7	50193838	50194327	10180490	10180521	1881912	32	490	15.3125	72.4956	2.43451	0.137312	0.823895	0.686583	0.0517329	hyper
2	66955838	66956344	2659972	2659995	899265	24	507	21.125	-72.4836	-2.17058	-0.151883	0.235328	0.387211	0.0544149	hypo
23	6440177	6440916	28348939	28348958	1134849	20	740	37	-72.4768	-2.72646	-0.227848	0.554369	0.782217	0.0667683	hypo
8	97175329	97176543	12137766	12137790	2028792	25	1215	48.6	-72.3262	-2.38425	-0.172338	0.46446	0.636798	0.06153	hypo
23	29612986	29613338	28678742	28678775	1152272	34	353	10.3824	-72.2874	-1.79894	-0.100322	0.721465	0.821788	0.0508308	hypo
1	147100799	147101415	1681171	1681202	143370	32	617	19.2812	72.27	2.76138	0.138958	0.743643	0.604685	0.0567428	hyper
26	47462349	47463197	31407176	31407205	1284968	30	849	28.3	-72.2441	-2.16288	-0.124605	0.277913	0.402518	0.0621269	hypo
4	40995187	40996115	5569520	5569541	1550295	22	929	42.2273	-72.2415	-1.79933	-0.114715	0.48308	0.597795	0.0595257	hypo
5	67912538	67913018	7420233	7420265	1685452	33	481	14.5758	-72.2264	-1.8245	-0.128165	0.569873	0.698038	0.0626247	hypo
16	18993377	18994487	21500038	21500056	629561	19	1111	58.4737	-72.2051	-1.80124	-0.175767	0.50974	0.685507	0.0486608	hypo
15	73348121	73349865	21088838	21088864	603402	27	1745	64.6296	-72.1441	-1.93731	-0.110442	0.52428	0.634722	0.0585634	hypo
25	10298833	10299623	30217800	30217826	1223639	27	791	29.2963	-72.1176	-1.93958	-0.101266	0.474372	0.575638	0.0519237	hypo
12	14579252	14580167	16744812	16744837	342838	26	916	35.2308	-72.1168	-1.93323	-0.15281	0.659491	0.812301	0.0593554	hypo
16	2049920	2050746	21314419	21314448	613022	30	827	27.5667	72.1164	2.62011	0.131441	0.75891	0.627469	0.0501421	hyper
16	27195835	27196410	21612146	21612170	636765	25	576	23.04	-72.1163	-2.13997	-0.14954	0.209074	0.358615	0.0623461	hypo
13	41196790	41197629	18337026	18337057	437781	32	840	26.25	-71.9629	-1.87823	-0.111948	0.373961	0.485909	0.0651288	hypo
X	134601276	134601835	34942780	34942808	2261029	29	560	19.3103	-71.9556	-1.83363	-0.12367	0.65784	0.78151	0.0522919	hypo
1	147965460	147966112	1694203	1694230	144049	28	653	23.3214	71.9521	3.02445	0.237569	0.802382	0.564813	0.0744506	hyper
16	52597639	52598205	21959483	21959505	657476	23	567	24.6522	-71.9328	-2.17471	-0.126512	0.517878	0.64439	0.054657	hypo
9	81122893	81123702	13354634	13354662	2119596	29	810	27.931	-71.9191	-1.92985	-0.112391	0.523206	0.635597	0.0611339	hypo
10	102993486	102993924	15117039	15117070	239400	32	439	13.7188	-71.9158	-1.99363	-0.108677	0.503726	0.612404	0.0574564	hypo
7	40386586	40387534	10062527	10062550	1873474	24	949	39.5417	71.9122	3.74505	0.167907	0.626645	0.458738	0.0537835	hyper
14	3087771	3088171	19064002	19064026	469280	25	401	16.04	-71.9023	-1.82718	-0.158509	0.435416	0.593925	0.0561967	hypo
27	33945100	33945659	31984782	31984808	1315083	27	560	20.7407	-71.8904	-1.80586	-0.158996	0.233653	0.392649	0.0568011	hypo
1	152262939	152263488	1771768	1771796	146753	29	550	18.9655	-71.8851	-1.84509	-0.138301	0.652883	0.791185	0.052757	hypo
10	26288866	26289819	14099734	14099767	170893	34	954	28.0588	71.8692	2.28965	0.113003	0.779977	0.666974	0.0499129	hyper
9	33508758	33509514	12798662	12798685	2072519	24	757	31.5417	-71.8396	-1.9201	-0.148744	0.169471	0.318215	0.0534688	hypo
17	40282869	40283845	22883517	22883538	717236	22	977	44.4091	-71.8198	-2.30049	-0.16301	0.592178	0.755187	0.0525391	hypo
16	45359514	45360281	21858511	21858536	652485	26	768	29.5385	-71.8147	-1.82702	-0.146935	0.624977	0.771912	0.0574953	hypo
11	2402017	2402684	15162550	15162578	241083	29	668	23.0345	71.8088	3.01601	0.127902	0.912949	0.785047	0.0558523	hyper
X	86690560	86690818	34374985	34375020	2216054	36	259	7.19444	-71.7875	-1.81744	-0.169283	0.373485	0.542768	0.0851167	hypo
11	43313722	43314249	15697420	15697449	277421	30	528	17.6	-71.7544	-1.98465	-0.118871	0.197723	0.316593	0.0499217	hypo
14	33302727	33303842	19520468	19520494	493107	27	1116	41.3333	71.7264	3.04669	0.161101	0.754421	0.59332	0.0525764	hyper
5	22454262	22455476	6871358	6871385	1642833	28	1215	43.3929	71.7107	2.98638	0.15175	0.638051	0.486302	0.0514834	hyper
24	21674993	21675957	29380396	29380422	1187206	27	965	35.7407	-71.6801	-1.85396	-0.12881	0.542539	0.671349	0.0575669	hypo
2	35139172	35139760	2309038	2309059	866948	22	589	26.7727	-71.6779	-1.84627	-0.153668	0.646194	0.799862	0.0519632	hypo
11	84428190	84430149	16210701	16210735	314628	35	1960	56	71.6259	2.20233	0.105414	0.751514	0.6461	0.0528805	hyper
24	58729154	58729564	29970607	29970639	1215268	33	411	12.4545	-71.6114	-1.87176	-0.125101	0.637635	0.762736	0.0624838	hypo
16	8675525	8676267	21397854	21397881	618811	28	743	26.5357	71.5777	2.71623	0.154711	0.698293	0.543582	0.0488677	hyper
11	72919622	72920358	16055916	16055941	304860	26	737	28.3462	71.5617	3.72052	0.163635	0.728078	0.564443	0.0531752	hyper
4	5345793	5346119	5129528	5129553	1516420	26	327	12.5769	-71.4449	-2.48882	-0.12664	0.122438	0.249078	0.0555988	hypo
3	20882710	20883181	3818631	3818662	1420504	32	472	14.75	-71.3994	-1.79597	-0.133195	0.450672	0.583867	0.0734378	hypo
9	65548731	65549566	13165423	13165453	2104524	31	836	26.9677	-71.3398	-1.82199	-0.102858	0.171424	0.274282	0.0527116	hypo
25	35892858	35893708	30628171	30628201	1241760	31	851	27.4516	-71.3262	-1.86499	-0.126767	0.472446	0.599213	0.0517858	hypo
X	138897454	138897956	35039692	35039717	2262786	26	503	19.3462	-71.2406	-1.9778	-0.128498	0.698784	0.827282	0.0482467	hypo
23	18711895	18712752	28545291	28545321	1143391	31	858	27.6774	-71.2366	-1.81471	-0.112743	0.38499	0.497733	0.0526174	hypo
24	45806408	45807061	29737401	29737426	1206814	26	654	25.1538	-71.2105	-1.90737	-0.134021	0.51071	0.644731	0.0567689	hypo
1	72799728	72801348	803984	804014	72592	31	1621	52.2903	-71.2035	-2.07304	-0.120127	0.459162	0.57929	0.0603929	hypo
23	41389973	41390565	28853485	28853506	1162009	22	593	26.9545	-71.1426	-1.79762	-0.19314	0.574902	0.768041	0.056012	hypo
16	43161415	43161864	21824962	21824984	650887	23	450	19.5652	-71.0709	-1.85886	-0.149087	0.445546	0.594634	0.0513013	hypo
15	80715304	80715833	21207193	21207219	608775	27	530	19.6296	-71.0614	-1.82864	-0.120408	0.422655	0.543063	0.0540331	hypo
18	17737252	17737861	23705969	23705999	751856	31	610	19.6774	-71.0303	-1.85225	-0.146112	0.212395	0.358508	0.0599878	hypo
10	42904076	42904658	14287558	14287584	187366	27	583	21.5926	-70.9529	-2.01014	-0.116503	0.725981	0.842484	0.0542636	hypo
7	23160219	23161148	9858391	9858420	1856893	30	930	31	-70.9314	-1.79558	-0.111707	0.604756	0.716463	0.0549644	hypo
6	90323129	90323990	9144580	9144606	1817837	27	862	31.9259	-70.8834	-2.0018	-0.120492	0.746206	0.866698	0.0518697	hypo
26	23888967	23889532	31041320	31041348	1267291	29	566	19.5172	-70.8631	-2.00874	-0.124367	0.183625	0.307992	0.0611009	hypo
1	89621551	89622413	1006984	1007007	88483	24	863	35.9583	-70.8356	-2.26128	-0.196206	0.590355	0.786561	0.0627946	hypo
14	14721465	14722432	19250293	19250321	477664	29	968	33.3793	-70.7901	-1.87965	-0.116918	0.626105	0.743023	0.0524567	hypo
24	46959043	46959893	29755753	29755783	1207655	31	851	27.4516	-70.778	-1.83562	-0.129668	0.16387	0.293537	0.0578497	hypo
11	726885	727653	15132445	15132468	240077	24	769	32.0417	-70.7702	-1.813	-0.135978	0.503859	0.639837	0.0506669	hypo
18	12108232	12108738	23623475	23623504	747645	30	507	16.9	-70.7418	-1.84374	-0.109117	0.377094	0.486211	0.058273	hypo
4	57261450	57262131	5753552	5753581	1566728	30	682	22.7333	-70.6734	-1.80715	-0.16051	0.293524	0.454034	0.0727558	hypo
8	111270066	111270588	12371162	12371187	2039056	26	523	20.1154	-70.6633	-1.89278	-0.110825	0.448445	0.559271	0.0511436	hypo
23	31538926	31539575	28704302	28704337	1153935	36	650	18.0556	-70.647	-1.80196	-0.109355	0.360341	0.469696	0.0511445	hypo
21	65242616	65243087	27270763	27270787	1078901	25	472	18.88	-70.6432	-2.20686	-0.170711	0.530292	0.701003	0.0544734	hypo
29	45961917	45962586	33471246	33471271	1399513	26	670	25.7692	-70.6424	-1.82823	-0.150067	0.138084	0.28815	0.0652487	hypo
23	10607502	10608233	28418597	28418625	1137639	29	732	25.2414	-70.619	-1.90593	-0.11294	0.63307	0.74601	0.0557538	hypo
21	67247726	67248064	27311656	27311685	1079988	30	339	11.3	70.6184	2.64306	0.141589	0.541201	0.399611	0.0530206	hyper
23	36994579	36994724	28781198	28781211	1158787	14	146	10.4286	-70.5946	-4.96594	-0.276166	0.627364	0.90353	0.0534957	hypo
3	93800861	93801355	4664344	4664369	1491323	26	495	19.0385	-70.5915	-1.84243	-0.12637	0.47112	0.59749	0.0547063	hypo
4	111669086	111669736	6447851	6447884	1616003	34	651	19.1471	70.5687	2.22734	0.19102	0.694482	0.503462	0.0760684	hyper
24	33219636	33220350	29538697	29538722	1197287	26	715	27.5	-70.5649	-2.2299	-0.143725	0.474475	0.6182	0.057892	hypo
25	26127156	26127785	30463452	30463472	1235394	21	630	30	-70.5563	-1.96495	-0.188195	0.401163	0.589358	0.0614392	hypo
17	15899891	15900674	22623596	22623615	692796	20	784	39.2	-70.5407	-2.41366	-0.140615	0.414854	0.555469	0.0527508	hypo
29	32681621	32682191	33269676	33269696	1390214	21	571	27.1905	-70.5341	-2.34479	-0.136419	0.375923	0.512342	0.0566035	hypo
6	58879270	58879992	8804238	8804265	1786217	28	723	25.8214	-70.4823	-2.01418	-0.150018	0.461215	0.611232	0.0558231	hypo
23	25309397	25311094	28636612	28636644	1148972	33	1698	51.4545	70.4398	2.40034	0.162383	0.768097	0.605714	0.0517948	hyper
8	8251914	8252380	11062768	11062794	1944964	27	467	17.2963	70.4181	3.08588	0.156934	0.746547	0.589614	0.0554689	hyper
27	13254591	13255457	31664216	31664244	1298788	29	867	29.8966	70.3538	2.87467	0.184733	0.715038	0.530304	0.0655249	hyper
26	18815354	18816773	30972264	30972290	1263030	27	1420	52.5926	70.3211	2.97595	0.15724	0.755138	0.597898	0.0509585	hyper
23	9136827	9137605	28394791	28394816	1136596	26	779	29.9615	-70.2752	-1.86896	-0.142258	0.541543	0.683802	0.0606694	hypo
23	43553825	43554618	28898250	28898282	1163131	33	794	24.0606	70.2487	2.55775	0.115515	0.787164	0.671649	0.0518807	hyper
19	57121085	57121581	25282461	25282493	830062	33	497	15.0606	70.2434	2.31365	0.121706	0.693018	0.571312	0.0522685	hyper
15	23381620	23382675	20428736	20428757	560327	22	1056	48	-70.227	-1.79195	-0.136941	0.537629	0.67457	0.060288	hypo
3	6825470	6826090	3636825	3636848	1408477	24	621	25.875	-70.2187	-1.83135	-0.12164	0.323316	0.444957	0.0614389	hypo
8	111250070	111250392	12370595	12370623	2039049	29	323	11.1379	-70.1967	-1.98596	-0.12645	0.622096	0.748546	0.0627766	hypo
21	16658276	16659355	26608527	26608550	1037900	24	1080	45	70.1807	3.31806	0.178983	0.620777	0.441794	0.0514612	hyper
10	75763839	75764988	14694704	14694730	218295	27	1150	42.5926	-70.1784	-2.00194	-0.136821	0.662833	0.799653	0.0526928	hypo
13	72875717	72877093	18805166	18805195	461724	30	1377	45.9	70.1462	2.80188	0.120537	0.589803	0.469265	0.0517161	hyper
7	5576660	5577047	9621969	9621990	1843255	22	388	17.6364	-70.1296	-1.82571	-0.174154	0.446083	0.620237	0.0500113	hypo
1	89574957	89575839	1006453	1006475	88433	23	883	38.3913	-70.1266	-1.87082	-0.223384	0.582769	0.806153	0.0602782	hypo
25	10464944	10465460	30221051	30221080	1223741	30	517	17.2333	70.1142	2.64273	0.109958	0.422179	0.312221	0.0531182	hyper
12	24381544	24383198	16900935	16900962	350181	28	1655	59.1071	70.0546	3.01668	0.195389	0.752517	0.557128	0.0518741	hyper
8	12114983	12115825	11125345	11125371	1947753	27	843	31.2222	-69.9839	-1.85452	-0.104798	0.638514	0.743313	0.050941	hypo
7	15701655	15702217	9753275	9753302	1851389	28	563	20.1071	-69.959	-2.01945	-0.117279	0.625225	0.742504	0.058171	hypo
23	41593613	41594579	28857982	28858006	1162113	25	967	38.68	-69.9175	-2.36414	-0.154141	0.415599	0.569741	0.0671945	hypo
8	53062415	53062813	11595271	11595295	1988072	25	399	15.96	-69.8949	-2.0014	-0.139826	0.304368	0.444194	0.0522895	hypo
13	70583426	70584421	18767905	18767926	460201	22	996	45.2727	69.8888	3.46215	0.232658	0.647859	0.4152	0.0493159	hyper
25	27640275	27640656	30486719	30486746	1236439	28	382	13.6429	-69.8244	-1.89159	-0.135346	0.543842	0.679188	0.05875	hypo
9	41510367	41510896	12896483	12896512	2080245	30	530	17.6667	-69.8127	-1.96378	-0.138029	0.51935	0.657378	0.0583281	hypo
4	88453013	88453603	6131176	6131192	1596261	17	591	34.7647	-69.8114	-2.22304	-0.175393	0.419031	0.594424	0.0525236	hypo
23	28066099	28066728	28660510	28660539	1150947	30	630	21	69.8051	2.59892	0.125675	0.455875	0.3302	0.0584759	hyper
3	118376559	118377048	5035480	5035510	1509880	31	490	15.8065	-69.7931	-1.82621	-0.126081	0.516549	0.64263	0.0731085	hypo
1	146585940	146586689	1673053	1673076	143029	24	750	31.25	-69.7856	-1.94874	-0.128132	0.623513	0.751645	0.0608673	hypo
16	43063138	43063479	21822745	21822770	650848	26	342	13.1538	-69.7691	-2.13786	-0.131002	0.485885	0.616887	0.0497096	hypo
14	22233279	22234274	19364836	19364860	483596	25	996	39.84	69.7362	3.02549	0.123484	0.560775	0.437291	0.0508209	hyper
10	4971703	4971993	13815199	13815227	154744	29	291	10.0345	-69.7237	-1.84245	-0.114778	0.617178	0.731955	0.0704614	hypo
26	49282923	49283525	31447972	31448003	1285886	32	603	18.8438	69.7149	2.44037	0.107756	0.68634	0.578585	0.0567474	hyper
27	43763812	43764777	32174925	32174955	1321088	31	966	31.1613	-69.7102	-1.79996	-0.10242	0.521886	0.624306	0.0562645	hypo
12	30951886	30952348	17000163	17000194	355515	32	463	14.4688	-69.7062	-1.86674	-0.10571	0.657252	0.762962	0.0496138	hypo
22	16384240	16384800	27610453	27610481	1093573	29	561	19.3448	-69.692	-1.95319	-0.179264	0.161388	0.340653	0.068572	hypo
26	14606805	14607499	30913630	30913657	1259560	28	695	24.8214	-69.6709	-1.92877	-0.118104	0.560685	0.678789	0.0708803	hypo
22	30283032	30284100	27792008	27792033	1106146	26	1069	41.1154	-69.6593	-1.90531	-0.122706	0.471436	0.594142	0.0530813	hypo
5	113112959	113113708	8027882	8027909	1723810	28	750	26.7857	-69.6568	-1.79281	-0.10329	0.649277	0.752567	0.0503313	hypo
X	135780331	135781127	34970458	34970481	2261466	24	797	33.2083	69.6277	4.24119	0.160418	0.741414	0.580996	0.0464704	hyper
13	29203784	29204489	18150079	18150109	428774	31	706	22.7742	69.6138	2.66057	0.163473	0.723975	0.560502	0.0603011	hyper
6	113135568	113136037	9466613	9466642	1836586	30	470	15.6667	69.6084	2.53533	0.142701	0.516364	0.373663	0.055099	hyper
2	22460481	22460856	2150530	2150557	854808	28	376	13.4286	-69.601	-1.97813	-0.13691	0.346336	0.483246	0.0566722	hypo
15	62645549	62646161	20946451	20946478	593885	28	613	21.8929	-69.5584	-1.8724	-0.108759	0.402389	0.511148	0.0571086	hypo
13	8306641	8307635	17835595	17835616	411949	22	995	45.2273	69.5533	3.82455	0.205926	0.7731	0.567174	0.0492342	hyper
7	53570487	53571219	10225131	10225155	1884905	25	733	29.32	-69.528	-2.48253	-0.120136	0.20875	0.328886	0.0559685	hypo
14	15280626	15282070	19259737	19259765	478070	29	1445	49.8276	69.5254	3.04751	0.160988	0.843916	0.682928	0.0531467	hyper
11	94484637	94485252	16367185	16367211	321955	27	616	22.8148	-69.5253	-1.84467	-0.158532	0.424576	0.583107	0.0659836	hypo
27	13698578	13699615	31671481	31671508	1299098	28	1038	37.0714	69.5179	2.86675	0.147241	0.773009	0.625768	0.050859	hyper
23	6427172	6427882	28348740	28348761	1134840	22	711	32.3182	69.505	3.58783	0.217507	0.571688	0.354181	0.0524456	hyper
9	99498903	99499766	13648645	13648674	2133582	30	864	28.8	69.4998	2.7149	0.100366	0.800563	0.700197	0.0497304	hyper
1	83513558	83513969	938469	938493	82521	25	412	16.48	-69.4895	-2.06799	-0.122807	0.620557	0.743363	0.0496831	hypo
5	1320164	1320881	6621363	6621386	1622011	24	718	29.9167	-69.4624	-1.95721	-0.169242	0.281614	0.450856	0.0551752	hypo
10	96980372	96981615	15006194	15006220	235413	27	1244	46.0741	69.4503	3.16982	0.152023	0.715114	0.563091	0.0496795	hyper
16	29403349	29404416	21643769	21643795	638620	27	1068	39.5556	69.4498	3.05524	0.173799	0.653147	0.479348	0.0593957	hyper
25	40266759	40267364	30711198	30711228	1244352	31	606	19.5484	69.4128	2.4432	0.12158	0.672131	0.550551	0.0501853	hyper
22	41628769	41629402	27956786	27956809	1115680	24	634	26.4167	-69.3997	-2.16878	-0.162939	0.323731	0.48667	0.0629767	hypo
10	83454043	83454672	14807821	14807847	224500	27	630	23.3333	-69.3919	-1.80163	-0.155703	0.21792	0.373623	0.0635652	hypo
5	100527457	100528766	7823077	7823106	1715492	30	1310	43.6667	-69.3699	-1.90709	-0.124181	0.500602	0.624783	0.0758653	hypo
8	59724161	59724556	11669263	11669287	1994733	25	396	15.84	-69.3625	-1.82079	-0.120689	0.222742	0.343431	0.053695	hypo
20	4932539	4932869	25504399	25504420	963884	22	331	15.0455	-69.3603	-2.01357	-0.168949	0.461826	0.630775	0.0518196	hypo
16	61759306	61759831	22080312	22080343	665536	32	526	16.4375	-69.2986	-1.85551	-0.103043	0.522644	0.625687	0.058248	hypo
29	49792339	49792679	33536745	33536772	1401487	28	341	12.1786	-69.2666	-1.95296	-0.104274	0.422168	0.526443	0.0561697	hypo
4	10100867	10101501	5198381	5198414	1520165	34	635	18.6765	-69.2553	-1.79307	-0.136036	0.390291	0.526327	0.0578614	hypo
6	30705124	30705684	8505902	8505927	1757631	26	561	21.5769	-69.2479	-2.0074	-0.113713	0.213914	0.327627	0.0588143	hypo
25	34719763	34720269	30607100	30607132	1241105	33	507	15.3636	-69.1771	-1.84235	-0.107389	0.512493	0.619883	0.0495486	hypo
4	43882641	43883452	5599749	5599768	1553362	20	812	40.6	-69.1729	-2.35064	-0.18526	0.522086	0.707347	0.0526281	hypo
17	51305620	51306098	23035507	23035535	726410	29	479	16.5172	-69.1364	-1.8275	-0.117682	0.60803	0.725711	0.0513236	hypo
X	31088041	31089445	33817032	33817061	2160225	30	1405	46.8333	69.1071	2.42481	0.118262	0.542167	0.423905	0.0470834	hyper
3	84206014	84206716	4537277	4537300	1482969	24	703	29.2917	-69.1028	-2.25962	-0.147193	0.320791	0.467984	0.0498869	hypo
13	81980672	81981265	18994063	18994084	466498	22	594	27	-69.1024	-1.91088	-0.130255	0.561275	0.691531	0.0488222	hypo
16	1437995	1438617	21305049	21305074	612566	26	623	23.9615	-69.0466	-1.90454	-0.141612	0.51176	0.653372	0.0533678	hypo
9	66620519	66621286	13177348	13177369	2105648	22	768	34.9091	-69.0162	-2.00572	-0.143636	0.464831	0.608467	0.0498316	hypo
1	79069215	79070172	878322	878346	78642	25	958	38.32	69.0131	3.15564	0.154694	0.715699	0.561005	0.0516849	hyper
11	49877950	49878318	15790881	15790902	282634	22	369	16.7727	-69.0116	-2.28301	-0.137953	0.267948	0.405901	0.0538622	hypo
19	10352106	10352801	24539140	24539168	797699	29	696	24	-69.0055	-2.05467	-0.150672	0.606959	0.757631	0.0610592	hypo
5	111420629	111421727	7997957	7997977	1722768	21	1099	52.3333	68.8971	3.83882	0.169835	0.799009	0.629174	0.0507096	hyper
14	7000468	7000948	19129189	19129216	471996	28	481	17.1786	-68.8703	-1.88498	-0.120477	0.57039	0.690867	0.056932	hypo
10	9650409	9651219	13887220	13887249	158457	30	811	27.0333	68.8689	2.42084	0.155214	0.82185	0.666636	0.049657	hyper
1	68386158	68386796	746421	746440	68668	20	639	31.95	-68.8177	-2.94929	-0.155312	0.315878	0.47119	0.0543219	hypo
19	54736187	54737205	25241742	25241772	828804	31	1019	32.871	68.7934	2.81566	0.166615	0.746108	0.579493	0.0563246	hyper
22	55457148	55457742	28170620	28170651	1125910	32	595	18.5938	68.7919	2.32716	0.149807	0.790544	0.640737	0.0681519	hyper
3	33594117	33594959	3989010	3989035	1431553	26	843	32.4231	68.7896	2.98789	0.137208	0.531634	0.394426	0.0506023	hyper
22	46294967	46295888	28025260	28025288	1119544	29	922	31.7931	68.7732	2.75485	0.161943	0.654819	0.492876	0.0518587	hyper
11	74667782	74668298	16080533	16080560	306287	28	517	18.4643	-68.7683	-1.93946	-0.143768	0.262617	0.406386	0.0600007	hypo
2	79530117	79531006	2790157	2790186	911927	30	890	29.6667	68.72	2.5586	0.143863	0.581651	0.437788	0.0667899	hyper
11	95776850	95777429	16385599	16385620	322978	22	580	26.3636	68.6794	3.24807	0.222059	0.823798	0.601739	0.0648526	hyper
13	72879790	72880786	18805234	18805255	461726	22	997	45.3182	-68.6439	-2.20686	-0.168234	0.648408	0.816643	0.0499607	hypo
14	26430824	26431187	19427506	19427530	486980	25	364	14.56	-68.5848	-2.2238	-0.138235	0.427692	0.565927	0.0514514	hypo
27	25484913	25486343	31847120	31847145	1308907	26	1431	55.0385	68.5659	3.05655	0.166594	0.81455	0.647956	0.0495663	hyper
8	10851878	10852190	11107097	11107116	1946741	20	313	15.65	-68.5597	-2.76946	-0.147987	0.644645	0.792632	0.0571729	hypo
19	22935665	22936094	24745565	24745587	806510	23	430	18.6957	-68.5334	-2.42118	-0.146028	0.699931	0.845959	0.0513066	hypo
19	47765649	47766169	25124907	25124929	824526	23	521	22.6522	-68.4708	-2.02852	-0.12136	0.533158	0.654519	0.054314	hypo
1	81598494	81599382	912892	912913	80822	22	889	40.4091	68.4479	3.58877	0.236574	0.836403	0.599829	0.0527885	hyper
9	102972828	102973362	13719378	13719405	2135640	28	535	19.1071	-68.4346	-1.79063	-0.110574	0.503676	0.61425	0.0565147	hypo
13	23577053	23577484	18067684	18067714	424183	31	432	13.9355	-68.4016	-1.80315	-0.143104	0.0568183	0.199923	0.0721021	hypo
18	60637870	60638464	24333230	24333255	785060	26	595	22.8846	-68.3548	-1.97263	-0.137147	0.224248	0.361395	0.0542295	hypo
21	21640686	21641397	26681036	26681062	1041690	27	712	26.3704	-68.3547	-1.92157	-0.113598	0.619602	0.7332	0.0502766	hypo
19	26697862	26698532	24804256	24804287	809132	32	671	20.9688	-68.354	-1.87527	-0.1334	0.170713	0.304113	0.06173	hypo
7	110545462	110545878	10952782	10952814	1937691	33	417	12.6364	-68.2829	-1.85221	-0.137147	0.576406	0.713553	0.0606602	hypo
27	33921248	33921931	31984316	31984342	1315073	27	684	25.3333	-68.2807	-1.83205	-0.123723	0.374776	0.498499	0.065179	hypo
24	805934	806455	29100521	29100542	1168659	22	522	23.7273	-68.2355	-2.29472	-0.172662	0.464716	0.637378	0.0588935	hypo
19	26885474	26886493	24806930	24806953	809287	24	1020	42.5	-68.2083	-1.95292	-0.121851	0.519907	0.641758	0.0503155	hypo
25	38742811	38743409	30681855	30681885	1243479	31	599	19.3226	68.1802	2.53816	0.132832	0.669788	0.536957	0.0553694	hyper
25	2772672	2773157	30083033	30083056	1219111	24	486	20.25	-68.15	-1.86821	-0.162236	0.539552	0.701787	0.0534546	hypo
29	49909550	49909884	33539191	33539213	1401551	23	335	14.5652	-68.1419	-1.90403	-0.141214	0.533395	0.674609	0.0541924	hypo
19	8294295	8295216	24506581	24506609	796163	29	922	31.7931	68.1359	3.0298	0.181436	0.698292	0.516856	0.0646147	hyper
19	60494900	60495383	25354827	25354847	831768	21	484	23.0476	-68.1341	-2.00241	-0.136302	0.482526	0.618828	0.0556298	hypo
26	41757169	41757930	31296393	31296419	1281915	27	762	28.2222	-68.1318	-1.8375	-0.121335	0.65752	0.778855	0.0522519	hypo
15	63706601	63707478	20962431	20962464	594743	34	878	25.8235	68.1249	3.3982	0.109027	0.535192	0.426165	0.0554452	hyper
9	63881639	63882268	13145413	13145440	2102873	28	630	22.5	-68.1188	-2.0998	-0.154447	0.554825	0.709271	0.0563822	hypo
23	31288768	31289118	28699674	28699707	1153732	34	351	10.3235	-68.1035	-1.83184	-0.128511	0.272177	0.400688	0.0603533	hypo
16	51861042	51862261	21947288	21947317	656984	30	1220	40.6667	68.0697	2.68927	0.122152	0.70626	0.584108	0.0510501	hyper
29	49993364	49994495	33540532	33540554	1401596	23	1132	49.2174	-68.0389	-1.97245	-0.223825	0.429385	0.65321	0.0783276	hypo
16	71888418	71889647	22235034	22235055	673564	22	1230	55.9091	-67.9574	-2.14968	-0.168363	0.619189	0.787553	0.0622917	hypo
29	37222049	37222641	33348446	33348464	1393052	19	593	31.2105	-67.951	-1.93726	-0.180091	0.500639	0.68073	0.0565424	hypo
20	15389731	15390459	25658435	25658456	972488	22	729	33.1364	-67.9433	-1.84013	-0.124223	0.278735	0.402958	0.0565315	hypo
9	60560736	60561529	13104089	13104112	2099691	24	794	33.0833	67.9331	3.5833	0.145913	0.727886	0.581973	0.0497496	hyper
18	59549424	59550053	24316205	24316231	784303	27	630	23.3333	-67.8969	-2.21315	-0.142469	0.336235	0.478704	0.061301	hypo
9	101697571	101698177	13691810	13691834	2134971	25	607	24.28	-67.8932	-1.90414	-0.132696	0.315862	0.448558	0.0603036	hypo
2	135836166	135836670	3548443	3548467	960290	25	505	20.2	67.8872	2.97432	0.171634	0.789431	0.617797	0.0542454	hyper
15	40338733	40339671	20680182	20680207	573567	26	939	36.1154	67.8223	2.83091	0.168932	0.787638	0.618706	0.0554481	hyper
23	48468940	48469425	28996000	28996032	1166047	33	486	14.7273	67.8129	2.15479	0.124034	0.782348	0.658313	0.0497474	hyper
21	8533372	8533898	26484780	26484804	1031543	25	527	21.08	-67.7953	-2.23574	-0.102583	0.614874	0.717457	0.0554963	hypo
11	97056609	97057213	16405485	16405504	323941	20	605	30.25	67.7609	4.19516	0.207782	0.852427	0.644645	0.0532877	hyper
18	5295502	5295981	23490210	23490235	743830	26	480	18.4615	-67.7236	-2.02072	-0.151526	0.452144	0.60367	0.0564491	hypo
1	156040621	156041475	1844512	1844540	149180	29	855	29.4828	-67.6514	-1.81558	-0.115473	0.487763	0.603236	0.074276	hypo
25	15692457	15693230	30307604	30307631	1227366	28	774	27.6429	-67.6448	-1.84603	-0.1201	0.523512	0.643611	0.0655909	hypo
18	10781162	10781638	23599691	23599715	746901	25	477	19.08	67.6429	2.92049	0.150469	0.760263	0.609794	0.0580428	hyper
13	8670160	8670602	17841284	17841305	412255	22	443	20.1364	67.638	3.47539	0.218922	0.818301	0.599379	0.0518644	hyper
8	104113916	104114567	12247125	12247155	2034092	31	652	21.0323	67.635	2.46062	0.180382	0.529548	0.349166	0.0808981	hyper
29	47258525	47258975	33495990	33496018	1400175	29	451	15.5517	-67.6125	-1.79516	-0.116214	0.494704	0.610918	0.0588251	hypo
18	52232436	52232926	24196667	24196693	779663	27	491	18.1852	-67.602	-1.81736	-0.124365	0.198506	0.322871	0.0637495	hypo
8	27758701	27759464	11307791	11307813	1963079	23	764	33.2174	67.5926	3.29613	0.23073	0.830088	0.599358	0.0516809	hyper
18	52365194	52365860	24198829	24198858	779765	30	667	22.2333	67.5605	2.75718	0.143943	0.578269	0.434326	0.054921	hyper
3	59351421	59352459	4273119	4273143	1457438	25	1039	41.56	-67.5379	-1.8661	-0.131361	0.519667	0.651028	0.0488344	hypo
5	22332749	22333323	6869625	6869649	1642715	25	575	23	-67.5221	-2.21112	-0.191682	0.597027	0.788709	0.0653355	hypo
25	42291042	42291700	30744525	30744550	1245373	26	659	25.3462	67.5171	2.91902	0.153766	0.668088	0.514322	0.0557235	hyper
5	45041294	45042551	7148602	7148626	1663594	25	1258	50.32	67.489	3.28908	0.150658	0.930334	0.779676	0.0518254	hyper
16	77155356	77155715	22327805	22327830	677132	26	360	13.8462	67.4884	2.75136	0.134124	0.751626	0.617502	0.0566988	hyper
14	12372686	12373358	19216974	19216994	475802	21	673	32.0476	67.4758	3.76947	0.166591	0.80649	0.639899	0.0496134	hyper
11	63262051	63262908	15924666	15924693	296541	28	858	30.6429	-67.4659	-2.08657	-0.116989	0.555476	0.672465	0.0520561	hypo
21	67592033	67592773	27318558	27318582	1080179	25	741	29.64	-67.4497	-1.87205	-0.150603	0.401983	0.552587	0.0516309	hypo
23	7052552	7053444	28360763	28360790	1135221	28	893	31.8929	67.4257	2.93813	0.110262	0.704388	0.594125	0.0580651	hyper
16	6563607	6564877	21378363	21378394	616597	32	1271	39.7188	67.4026	2.30576	0.156677	0.675984	0.519306	0.0518234	hyper
21	12856721	12857465	26544774	26544793	1035309	20	745	37.25	-67.3944	-2.60206	-0.183458	0.0762943	0.259752	0.0616543	hypo
24	17434165	17435622	29326695	29326715	1183375	21	1458	69.4286	67.3893	3.61939	0.240186	0.825522	0.585336	0.0555855	hyper
6	13746810	13747931	8299875	8299892	1741335	18	1122	62.3333	-67.3341	-2.35363	-0.216376	0.407666	0.624042	0.0535686	hypo
6	12311032	12311574	8280651	8280679	1740000	29	543	18.7241	-67.3238	-1.79267	-0.121139	0.300286	0.421425	0.05854	hypo
1	79029519	79030233	877739	877762	78610	24	715	29.7917	67.3093	3.1539	0.154455	0.692877	0.538423	0.0523484	hyper
21	66810191	66811021	27301314	27301346	1079765	33	831	25.1818	-67.3009	-1.80352	-0.143091	0.683703	0.826795	0.0677008	hypo
11	3834665	3835403	15186096	15186119	242065	24	739	30.7917	-67.226	-2.12337	-0.130787	0.643689	0.774475	0.0494573	hypo
16	4307961	4308668	21353320	21353340	614471	21	708	33.7143	-67.222	-1.84299	-0.147882	0.61873	0.766612	0.0523321	hypo
13	74635324	74635965	18832724	18832744	462971	21	642	30.5714	-67.2206	-2.13019	-0.150292	0.522977	0.673269	0.0561642	hypo
23	32949166	32949996	28725678	28725711	1155194	34	831	24.4412	-67.1937	-1.825	-0.148687	0.672914	0.821601	0.0567786	hypo
4	118646616	118646932	6580673	6580693	1620034	21	317	15.0952	67.1729	3.60338	0.160727	0.743195	0.582468	0.0518452	hyper
3	68833719	68834898	4369575	4369601	1467337	27	1180	43.7037	-67.1358	-2.03963	-0.187963	0.264649	0.452613	0.0493744	hypo
1	142078372	142079142	1603730	1603755	139947	26	771	29.6538	-67.1335	-1.90821	-0.162653	0.65276	0.815413	0.0550786	hypo
21	20618745	20619414	26664756	26664785	1040993	30	670	22.3333	-67.1064	-1.95917	-0.112014	0.733581	0.845594	0.0506148	hypo
13	27824530	27825572	18128831	18128849	427731	19	1043	54.8947	67.0854	4.13318	0.244639	0.772763	0.528124	0.0599596	hyper
16	2456943	2457996	21321601	21321619	613271	19	1054	55.4737	-67.0695	-2.33796	-0.207347	0.596822	0.804169	0.0508997	hypo
17	21621028	21622416	22697484	22697510	697949	27	1389	51.4444	-67.0568	-1.87451	-0.128458	0.431238	0.559696	0.0600671	hypo
12	30083605	30084478	16983691	16983712	355008	22	874	39.7273	-67.0427	-1.86081	-0.133673	0.445607	0.57928	0.0559525	hypo
11	95745178	95745816	16385189	16385211	322949	23	639	27.7826	67.0422	3.2711	0.2037	0.859067	0.655367	0.0498688	hyper
19	62170874	62171560	25394990	25395011	832502	22	687	31.2273	67.0406	4.1109	0.185945	0.73274	0.546795	0.0503776	hyper
9	753301	753920	12417138	12417162	2040868	25	620	24.8	67.0342	2.97992	0.184835	0.553903	0.369067	0.0519051	hyper
10	89712081	89712568	14908691	14908713	228906	23	488	21.2174	67.0325	3.45266	0.181019	0.842957	0.661938	0.052841	hyper
1	73266930	73267665	810891	810918	72965	28	736	26.2857	-67.0172	-2.11866	-0.103639	0.37688	0.480519	0.0508208	hypo
X	64634705	64635074	34160855	34160881	2193313	27	370	13.7037	-67.0104	-1.87354	-0.102099	0.452978	0.555077	0.058377	hypo
20	70113211	70113748	26346313	26346340	1023099	28	538	19.2143	-67.0004	-2.03354	-0.136939	0.440175	0.577114	0.0566208	hypo
12	85319240	85319605	17691858	17691879	403487	22	366	16.6364	-66.9363	-2.79099	-0.191751	0.448255	0.640006	0.0625005	hypo
7	14861108	14861694	9739134	9739160	1850892	27	587	21.7407	-66.9218	-1.91667	-0.11881	0.540534	0.659343	0.0545323	hypo
13	16255372	16256043	17958587	17958613	418171	27	672	24.8889	66.9048	2.76355	0.169542	0.810986	0.641444	0.0508036	hyper
3	40194652	40195158	4058478	4058502	1438274	25	507	20.28	66.8839	2.82715	0.173524	0.711827	0.538303	0.0494927	hyper
13	36639101	36640027	18260639	18260664	434729	26	927	35.6538	66.8737	2.70088	0.203283	0.794946	0.591663	0.0494563	hyper
9	98891120	98891639	13637008	13637033	2133218	26	520	20	66.8455	2.87683	0.129214	0.679057	0.549844	0.0514639	hyper
12	28955810	28956523	16964428	16964451	354255	24	714	29.75	-66.8245	-2.03317	-0.100186	0.598062	0.698248	0.0545104	hypo
17	67079352	67079625	23313433	23313460	736507	28	274	9.78571	-66.8069	-2.07706	-0.101243	0.330147	0.431389	0.0612828	hypo
13	16833818	16834928	17969199	17969224	418519	26	1111	42.7308	66.7864	2.82847	0.118117	0.56389	0.445773	0.0504999	hyper
27	42519501	42520264	32150559	32150591	1320340	33	764	23.1515	66.7816	2.24093	0.136918	0.63029	0.493372	0.0641772	hyper
28	35773936	35774409	32677685	32677707	1353860	23	474	20.6087	66.7693	3.03845	0.281964	0.813782	0.531819	0.0804477	hyper
3	81083150	81084575	4497669	4497692	1480029	24	1426	59.4167	66.7371	2.91945	0.124709	0.674717	0.550009	0.0492088	hyper
28	45146076	45146589	32816437	32816468	1361368	32	514	16.0625	66.7279	2.48136	0.123818	0.849212	0.725394	0.0500598	hyper
16	76666623	76666986	22317575	22317606	676846	32	364	11.375	66.6745	2.15373	0.139974	0.812625	0.67265	0.0593997	hyper
4	74944704	74945230	5972184	5972207	1583401	24	527	21.9583	-66.6488	-2.00637	-0.141055	0.434377	0.575433	0.0513374	hypo
3	71779857	71780765	4398594	4398618	1470435	25	909	36.36	66.6376	3.0464	0.140759	0.69201	0.551251	0.0546203	hyper
18	22621543	22622407	23782290	23782319	755422	30	865	28.8333	-66.634	-1.8281	-0.115223	0.147686	0.262909	0.0531984	hypo
7	16158656	16159354	9759818	9759845	1851733	28	699	24.9643	-66.6312	-1.79889	-0.105188	0.426184	0.531372	0.0494128	hypo
18	18726077	18726811	23723047	23723069	752477	23	735	31.9565	-66.5264	-2.24369	-0.151793	0.597841	0.749634	0.0543586	hypo
10	10831184	10832194	13904202	13904233	159380	32	1011	31.5938	66.5051	2.33929	0.133502	0.841956	0.708455	0.0497276	hyper
21	35013067	35014706	26873844	26873861	1051962	18	1640	91.1111	66.4686	4.65826	0.263311	0.862761	0.59945	0.049576	hyper
1	593796	594226	8835	8865	392	31	431	13.9032	-66.4241	-1.81045	-0.113698	0.451316	0.565013	0.0739557	hypo
X	3961641	3961841	33598226	33598249	2140519	24	201	8.375	-66.3826	-2.1933	-0.162022	0.242073	0.404095	0.0579798	hypo
10	80197037	80198067	14755707	14755731	222199	25	1031	41.24	-66.3567	-2.00418	-0.150706	0.449415	0.600121	0.052782	hypo
17	67105329	67105991	23313917	23313941	736522	25	663	26.52	-66.3449	-1.87045	-0.100239	0.328145	0.428384	0.0529631	hypo
4	68172863	68173685	5890118	5890140	1576958	23	823	35.7826	-66.3056	-1.81183	-0.127733	0.500726	0.62846	0.051751	hypo
12	21967834	21968349	16863307	16863340	348297	34	516	15.1765	66.2893	2.04699	0.115144	0.705749	0.590606	0.0589719	hyper
14	7545648	7546628	19139172	19139194	472327	23	981	42.6522	66.286	3.5044	0.221998	0.751243	0.529245	0.0535875	hyper
13	72212002	72212637	18794142	18794173	461300	32	636	19.875	66.1871	2.33116	0.123719	0.802189	0.678471	0.049784	hyper
7	94722712	94723440	10725934	10725961	1924086	28	729	26.0357	-66.1855	-1.93427	-0.138812	0.478246	0.617059	0.0723281	hypo
1	81760851	81761681	915295	915317	80964	23	831	36.1304	-66.1769	-1.95329	-0.14975	0.288161	0.437911	0.0517662	hypo
29	28590095	28591290	33200354	33200385	1387488	32	1196	37.375	66.1565	2.3937	0.122497	0.705971	0.583474	0.0538776	hyper
18	49937272	49937965	24160650	24160678	778216	29	694	23.931	-66.1422	-1.83492	-0.121259	0.488193	0.609452	0.0594363	hypo
9	101862007	101862676	13695608	13695634	2135046	27	670	24.8148	-66.1377	-1.8329	-0.120313	0.729582	0.849895	0.050085	hypo
5	48270645	48271372	7191360	7191384	1666502	25	728	29.12	-66.1225	-2.03999	-0.109282	0.403692	0.512975	0.0680809	hypo
1	133440057	133441035	1498033	1498054	132087	22	979	44.5	66.0871	3.84705	0.213446	0.663082	0.449635	0.0577597	hyper
11	78188033	78188491	16125503	16125527	309465	25	459	18.36	-66.0746	-1.80617	-0.138131	0.651262	0.789393	0.0612832	hypo
13	23259176	23260280	18063705	18063735	423881	31	1105	35.6452	66.0743	2.59628	0.111656	0.475276	0.36362	0.0487591	hyper
16	2448765	2449477	21321455	21321485	613264	31	713	23	66.0473	2.28407	0.12513	0.573545	0.448415	0.0560444	hyper
26	49912571	49913233	31460819	31460841	1286243	23	663	28.8261	66.036	3.5903	0.171429	0.570936	0.399507	0.0571597	hyper
21	64940523	64940850	27264784	27264811	1078739	28	328	11.7143	-66.0091	-1.80369	-0.128968	0.253269	0.382237	0.0558065	hypo
14	82055209	82055774	20171019	20171047	536999	29	566	19.5172	-65.9993	-1.84831	-0.121256	0.589012	0.710268	0.0537344	hypo
24	54784560	54785151	29884872	29884899	1213246	28	592	21.1429	-65.9376	-1.82322	-0.121887	0.493789	0.615676	0.0575026	hypo
29	2160716	2161187	32861704	32861730	1363594	27	472	17.4815	-65.9128	-1.90038	-0.101111	0.348618	0.449729	0.0519287	hypo
1	136135306	136136697	1532029	1532052	134441	24	1392	58	-65.9073	-1.80401	-0.16621	0.591481	0.757691	0.0567461	hypo
3	48845748	48847121	4151417	4151441	1447260	25	1374	54.96	-65.8937	-2.01096	-0.106932	0.610671	0.717603	0.0655525	hypo
1	155309538	155309908	1830676	1830705	148688	30	371	12.3667	65.8853	2.37195	0.163355	0.735516	0.572161	0.050633	hyper
16	51919248	51920162	21948178	21948200	657033	23	915	39.7826	-65.863	-1.8409	-0.118875	0.325118	0.443993	0.0490174	hypo
X	129639457	129640331	34860987	34861004	2257722	18	875	48.6111	-65.8429	-2.33637	-0.167582	0.407088	0.57467	0.0553561	hypo
11	89086205	89087022	16286126	16286150	317838	25	818	32.72	-65.7914	-1.85464	-0.126945	0.424248	0.551193	0.0556386	hypo
24	33328223	33328726	29540790	29540806	1197348	17	504	29.6471	-65.7694	-3.15303	-0.187671	0.53724	0.724911	0.050965	hypo
10	8269996	8270448	13865058	13865076	157374	19	453	23.8421	-65.7416	-2.6616	-0.161282	0.542635	0.703917	0.0514566	hypo
X	4819489	4819762	33609970	33609988	2141109	19	274	14.4211	-65.6986	-2.71117	-0.158568	0.3077	0.466268	0.0523631	hypo
2	110446050	110446914	3152911	3152934	941858	24	865	36.0417	-65.6674	-2.2701	-0.104822	0.399275	0.504098	0.0507016	hypo
3	97795517	97795967	4709418	4709439	1495308	22	451	20.5	65.6663	3.40754	0.178234	0.877321	0.699087	0.0487286	hyper
2	135138229	135139105	3534769	3534799	959925	31	877	28.2903	65.6513	2.72344	0.14742	0.74549	0.59807	0.0591459	hyper
17	14042768	14044169	22598649	22598670	691106	22	1402	63.7273	65.6488	3.5914	0.174226	0.659222	0.484997	0.0570783	hyper
12	21938801	21939089	16862594	16862623	348285	30	289	9.63333	-65.6396	-1.81189	-0.123905	0.209857	0.333761	0.0662603	hypo
10	73118288	73119644	14663307	14663329	215716	23	1357	59	65.6033	3.60567	0.174625	0.868878	0.694253	0.0543836	hyper
19	54298560	54299228	25233390	25233413	828585	24	669	27.875	-65.5765	-2.06529	-0.128953	0.486579	0.615532	0.0550105	hypo
2	132773083	132773721	3487108	3487132	958721	25	639	25.56	65.5699	2.85244	0.192098	0.601655	0.409558	0.0542319	hyper
18	52388568	52389521	24199166	24199187	779782	22	954	43.3636	-65.5266	-2.048	-0.212213	0.498041	0.710254	0.0624927	hypo
13	62398403	62399215	18640259	18640286	454357	28	813	29.0357	-65.505	-1.83729	-0.127371	0.506082	0.633453	0.0615157	hypo
2	129007147	129008029	3420827	3420854	956517	28	883	31.5357	65.4963	2.90778	0.166819	0.810751	0.643933	0.0597215	hyper
10	99909225	99909888	15048758	15048782	237849	25	664	26.56	-65.4386	-1.93899	-0.127936	0.358012	0.485948	0.0599842	hypo
12	52732181	52733648	17262007	17262032	375961	26	1468	56.4615	65.4346	3.13881	0.168267	0.79345	0.625183	0.0504178	hyper
19	40743784	40744320	25023630	25023665	819031	36	537	14.9167	65.4321	1.88776	0.112182	0.737422	0.62524	0.0587268	hyper
X	62916931	62917150	34143673	34143685	2191580	13	220	16.9231	-65.4185	-4.39608	-0.194777	0.425895	0.620671	0.0482725	hypo
27	44792206	44793991	32193386	32193413	1321810	28	1786	63.7857	-65.3876	-2.09153	-0.165136	0.497963	0.663099	0.0588515	hypo
11	15481040	15481742	15365027	15365052	250972	26	703	27.0385	-65.3638	-1.79845	-0.112294	0.475467	0.587761	0.0495466	hypo
18	12472138	12472773	23631524	23631554	747824	31	636	20.5161	65.3417	2.23065	0.124166	0.683565	0.5594	0.0519143	hyper
7	107849022	107849522	10904785	10904806	1935784	22	501	22.7727	-65.3244	-2.12378	-0.112516	0.575046	0.687562	0.0529987	hypo
13	73036525	73037293	18808312	18808335	461817	24	769	32.0417	-65.3072	-1.81565	-0.163995	0.710543	0.874538	0.0614301	hypo
13	79777565	79778007	18939606	18939634	465570	29	443	15.2759	-65.3049	-1.9633	-0.120915	0.281605	0.40252	0.0550283	hypo
10	44737194	44738121	14310302	14310331	189108	30	928	30.9333	65.297	2.32816	0.16886	0.792275	0.623415	0.0700942	hyper
22	48430757	48431159	28058446	28058471	1121143	26	403	15.5	-65.295	-2.22263	-0.146925	0.529816	0.67674	0.0609545	hypo
15	82741975	82743280	21243258	21243281	610067	24	1306	54.4167	65.2679	3.38389	0.214742	0.721257	0.506515	0.0571878	hyper
X	138358098	138358634	35025917	35025939	2262601	23	537	23.3478	-65.2486	-1.79587	-0.158778	0.44636	0.605138	0.064008	hypo
29	8837550	8838524	32949976	32950003	1369549	28	975	34.8214	-65.2351	-1.82043	-0.192026	0.615329	0.807355	0.0613077	hypo
7	18426090	18426692	9792247	9792275	1853386	29	603	20.7931	65.2304	2.48891	0.128484	0.618747	0.490263	0.0571774	hyper
19	53588481	53588946	25220104	25220130	828188	27	466	17.2593	-65.2067	-2.08119	-0.151319	0.183973	0.335292	0.0679852	hypo
5	106351755	106352694	7910412	7910439	1719749	28	940	33.5714	65.153	2.79827	0.151561	0.821865	0.670303	0.0517461	hyper
1	116836493	116837516	1301167	1301191	116155	25	1024	40.96	65.1253	3.14982	0.150194	0.790743	0.640549	0.0496834	hyper
3	42641356	42642185	4082743	4082770	1440859	28	830	29.6429	-65.1195	-2.05001	-0.107421	0.523725	0.631146	0.0539756	hypo
4	10034007	10034726	5196821	5196849	1520133	29	720	24.8276	-65.0327	-1.84182	-0.149239	0.22357	0.37281	0.0710158	hypo
12	16437622	16438209	16777367	16777396	344097	30	588	19.6	-64.9946	-1.79575	-0.119385	0.51448	0.633865	0.0621177	hypo
4	66184250	66184981	5862602	5862623	1575197	22	732	33.2727	64.9895	3.51113	0.178019	0.795668	0.617649	0.0510288	hyper
3	115288345	115288777	4973638	4973665	1508253	28	433	15.4643	-64.9634	-1.94782	-0.125608	0.577359	0.702967	0.0613144	hypo
2	121575466	121575789	3305151	3305188	951255	38	324	8.52632	64.8928	1.7269	0.105863	0.324354	0.21849	0.049837	hyper
3	15561445	15562066	3745871	3745898	1416068	28	622	22.2143	-64.828	-1.83239	-0.104595	0.474857	0.579452	0.0603392	hypo
20	58505890	58506555	26155309	26155331	1014672	23	666	28.9565	64.7918	3.05572	0.185982	0.811109	0.625127	0.0593578	hyper
17	4957580	4958100	22460318	22460340	683880	23	521	22.6522	64.7915	3.24795	0.160402	0.807306	0.646904	0.05985	hyper
19	62556572	62557079	25403786	25403810	832724	25	508	20.32	-64.7716	-1.98573	-0.132034	0.640527	0.772561	0.050175	hypo
4	86732919	86734034	6110445	6110471	1594594	27	1116	41.3333	64.7343	2.6622	0.151815	0.662571	0.510756	0.0545841	hyper
10	115571	116249	13746020	13746049	150786	30	679	22.6333	64.7115	2.39525	0.130103	0.600231	0.470128	0.04949	hyper
13	61767049	61767278	18629915	18629933	453956	19	230	12.1053	-64.6944	-2.6874	-0.206457	0.655912	0.862369	0.0546075	hypo
22	44354195	44354819	27998386	27998411	1117840	26	625	24.0385	-64.6784	-1.83602	-0.149366	0.264065	0.413431	0.0556863	hypo
25	6875303	6875932	30156250	30156270	1221581	21	630	30	64.6459	3.22188	0.199547	0.755057	0.55551	0.0550526	hyper
8	43147465	43147793	11480083	11480112	1978417	30	329	10.9667	-64.6304	-1.85966	-0.106355	0.448513	0.554867	0.0579825	hypo
7	52598716	52599094	10211607	10211630	1884146	24	379	15.7917	-64.6252	-2.55558	-0.204326	0.0106622	0.214988	0.0664928	hypo
19	33550078	33550871	24920065	24920090	813601	26	794	30.5385	-64.6182	-2.04741	-0.135421	0.639179	0.7746	0.0644443	hypo
20	16583270	16584087	25670165	25670187	973790	23	818	35.5652	-64.5626	-1.96954	-0.110935	0.540724	0.651659	0.0511352	hypo
5	50887894	50888458	7226765	7226786	1668868	22	565	25.6818	64.5287	3.29452	0.158804	0.774161	0.615357	0.049755	hyper
12	86342995	86343432	17715588	17715619	404042	32	438	13.6875	-64.5158	-1.81509	-0.104397	0.771468	0.875865	0.0500676	hypo
29	4946584	4947647	32896865	32896887	1366161	23	1064	46.2609	64.5131	3.30388	0.243789	0.716758	0.472969	0.0584138	hyper
12	18018466	18019820	16800123	16800156	345394	34	1355	39.8529	64.4913	2.28471	0.130321	0.553645	0.423325	0.0604473	hyper
9	39150680	39151248	12865218	12865243	2078075	26	569	21.8846	-64.4675	-1.98352	-0.165185	0.577633	0.742819	0.0655683	hypo
4	60359766	60360692	5787386	5787410	1569879	25	927	37.08	-64.4184	-1.99348	-0.136896	0.643962	0.780858	0.0507761	hypo
11	87636613	87637005	16260047	16260067	316945	21	393	18.7143	-64.4038	-2.6844	-0.141329	0.311682	0.453012	0.052316	hypo
26	33564262	33564840	31163599	31163624	1275978	26	579	22.2692	-64.3851	-1.89149	-0.130093	0.595631	0.725724	0.0547465	hypo
22	59205048	59205748	28241667	28241689	1128057	23	701	30.4783	64.3797	3.08765	0.144543	0.810055	0.665512	0.0542531	hyper
18	56311460	56312012	24266302	24266323	782059	22	553	25.1364	-64.3669	-1.8433	-0.147927	0.507296	0.655223	0.0550275	hypo
14	67217965	67218572	19943659	19943683	524719	25	608	24.32	-64.3638	-1.86372	-0.107946	0.516869	0.624815	0.0524687	hypo
9	101921085	101921919	13696985	13697015	2135077	31	835	26.9355	64.358	2.24498	0.142334	0.736007	0.593673	0.0719956	hyper
16	2445030	2445753	21321408	21321432	613260	25	724	28.96	64.3405	3.16525	0.150507	0.660001	0.509494	0.0497571	hyper
20	6460691	6462072	25529950	25529979	964912	30	1382	46.0667	64.3368	2.31712	0.141905	0.749373	0.607468	0.056745	hyper
24	56309719	56310571	29913413	29913439	1214232	27	853	31.5926	-64.3246	-1.80492	-0.118767	0.836719	0.955487	0.0574937	hypo
4	24076273	24076529	5373369	5373399	1533381	31	257	8.29032	-64.313	-1.90097	-0.104063	0.119389	0.223451	0.061311	hypo
23	39148848	39149543	28813248	28813276	1160522	29	696	24	-64.2972	-1.81003	-0.11675	0.410931	0.527681	0.0564267	hypo
5	50815596	50815954	7225490	7225514	1668830	25	359	14.36	-64.2952	-2.11217	-0.126519	0.256508	0.383027	0.0606867	hypo
10	102270320	102270900	15102760	15102786	238983	27	581	21.5185	-64.2902	-2.30307	-0.105207	0.194095	0.299302	0.0502375	hypo
20	7908092	7909401	25553419	25553445	965977	27	1310	48.5185	64.2417	2.88928	0.213803	0.795407	0.581604	0.0590822	hyper
8	989884	990290	10968199	10968218	1938573	20	407	20.35	-64.2384	-1.99709	-0.138199	0.506298	0.644497	0.0542896	hypo
21	56592901	56593568	27125559	27125587	1073280	29	668	23.0345	64.2327	2.34112	0.165236	0.788829	0.623593	0.0507732	hyper
25	34179238	34179684	30598014	30598039	1240790	26	447	17.1923	-64.2223	-1.94954	-0.142209	0.571445	0.713655	0.0579419	hypo
9	94496714	94497226	13548048	13548071	2130654	24	513	21.375	-64.187	-1.9757	-0.12369	0.380417	0.504107	0.0608867	hypo
6	101973071	101973746	9302950	9302975	1828069	26	676	26	-64.1628	-1.86536	-0.156343	0.535469	0.691812	0.0621158	hypo
27	26619301	26619587	31867892	31867913	1309611	22	287	13.0455	-64.1577	-2.22722	-0.109142	0.625419	0.734561	0.0491379	hypo
10	26610528	26611614	14104576	14104592	171176	17	1087	63.9412	64.146	4.18754	0.208708	0.7681	0.559392	0.0497736	hyper
11	85468442	85470173	16223592	16223618	315579	27	1732	64.1481	64.1421	2.68678	0.11459	0.65143	0.53684	0.0515635	hyper
11	97822647	97822951	16419065	16419095	324424	31	305	9.83871	64.1359	2.1936	0.159985	0.805334	0.645349	0.0668862	hyper
X	79371760	79373281	34301078	34301107	2208769	30	1522	50.7333	64.1185	2.68216	0.111288	0.829254	0.717966	0.0442409	hyper
6	12378561	12379182	8281770	8281793	1740062	24	622	25.9167	64.1074	2.83127	0.182739	0.733101	0.550362	0.050516	hyper
7	109058327	109058766	10927861	10927891	1936601	31	440	14.1935	64.0983	2.23921	0.207138	0.846925	0.639787	0.0790992	hyper
14	28138805	28139751	19452024	19452052	488379	29	947	32.6552	-64.0813	-1.79464	-0.107551	0.785248	0.892799	0.0507369	hypo
9	33504328	33504917	12798523	12798548	2072517	26	590	22.6923	-64.0582	-2.06362	-0.129852	0.27193	0.401782	0.053054	hypo
14	33746458	33747164	19527358	19527389	493461	32	707	22.0938	-64.0396	-1.80604	-0.100536	0.373697	0.474233	0.0708782	hypo
25	9006233	9007077	30194207	30194236	1222885	30	845	28.1667	-64.0394	-1.82103	-0.112866	0.245782	0.358648	0.0592771	hypo
28	34618509	34618973	32661774	32661799	1352926	26	465	17.8846	64.032	2.59082	0.118198	0.741838	0.62364	0.0522779	hyper
17	44478937	44479447	22929852	22929874	721431	23	511	22.2174	64.0302	3.59725	0.141721	0.673994	0.532273	0.0520923	hyper
7	12532010	12533169	9709924	9709945	1848887	22	1160	52.7273	-64.0142	-1.88138	-0.132958	0.483858	0.616816	0.0615716	hypo
22	58260223	58260673	28225389	28225413	1127528	25	451	18.04	-64.0013	-1.95039	-0.118508	0.666	0.784508	0.0483663	hypo
11	88899641	88900240	16282799	16282822	317721	24	600	25	64.0004	2.99374	0.139255	0.715343	0.576088	0.0494573	hyper
7	81059303	81060217	10557497	10557523	1911035	27	915	33.8889	63.993	2.90042	0.157442	0.74302	0.585578	0.0553724	hyper
23	36909666	36910408	28779809	28779830	1158715	22	743	33.7727	-63.9844	-1.89105	-0.202111	0.666993	0.869105	0.0583192	hypo
17	46409103	46410154	22958361	22958385	722807	25	1052	42.08	-63.984	-1.80819	-0.101213	0.20215	0.303363	0.0530108	hypo
11	105390431	105390882	16544235	16544259	328694	25	452	18.08	-63.9586	-2.20989	-0.12245	0.656574	0.779025	0.0611532	hypo
1	130983604	130984743	1470456	1470486	129677	31	1140	36.7742	63.9578	2.30438	0.165629	0.721598	0.555968	0.0573111	hyper
14	9860732	9861556	19179080	19179104	473793	25	825	33	63.9501	3.00321	0.131939	0.767687	0.635749	0.0513937	hyper
11	102594676	102595287	16504109	16504127	327161	19	612	32.2105	63.9471	3.81156	0.257998	0.841697	0.583699	0.0632034	hyper
11	15303359	15304432	15362161	15362188	250840	28	1074	38.3571	63.9146	2.57971	0.200272	0.851137	0.650865	0.0685836	hyper
1	111407437	111408221	1241925	1241951	110615	27	785	29.0741	-63.914	-1.81225	-0.134463	0.214161	0.348624	0.0626665	hypo
16	78110446	78110970	22347828	22347847	677685	20	525	26.25	-63.8754	-1.87759	-0.132885	0.637423	0.770308	0.0537138	hypo
8	81666941	81667685	11953274	11953297	2014175	24	745	31.0417	63.8274	2.91811	0.178642	0.593878	0.415236	0.0582652	hyper
27	1189202	1189437	31504619	31504637	1287981	19	236	12.4211	-63.8144	-2.49777	-0.154912	0.478011	0.632923	0.0530422	hypo
24	10941970	10942430	29263726	29263750	1176509	25	461	18.44	-63.7651	-1.96688	-0.123908	0.590913	0.714822	0.0591323	hypo
18	1708147	1708553	23428676	23428691	741332	16	407	25.4375	-63.7624	-3.3678	-0.226138	0.49983	0.725969	0.0568373	hypo
9	70437024	70438409	13223251	13223275	2109394	25	1386	55.44	63.716	3.11909	0.182126	0.779156	0.59703	0.06702	hyper
22	40108697	40109113	27934859	27934880	1114390	22	417	18.9545	-63.6972	-1.96931	-0.191301	0.27045	0.461752	0.0699762	hypo
10	10143145	10143768	13894550	13894572	158775	23	624	27.1304	-63.6904	-1.93446	-0.112588	0.372646	0.485235	0.0551819	hypo
15	77210678	77210971	21157278	21157295	605774	18	294	16.3333	-63.6738	-1.79679	-0.194433	0.514607	0.709041	0.0550031	hypo
19	55959652	55960208	25263637	25263665	829462	29	557	19.2069	63.6694	2.36285	0.128123	0.519701	0.391578	0.0649353	hyper
17	59792469	59792784	23174933	23174952	732370	20	316	15.8	-63.6445	-2.0496	-0.154402	0.444883	0.599285	0.0596593	hypo
24	37164012	37164595	29597807	29597838	1200476	32	584	18.25	63.6301	2.20493	0.166569	0.628283	0.461714	0.0660336	hyper
14	80639329	80639705	20138404	20138432	536231	29	377	13	-63.627	-1.92153	-0.114826	0.613249	0.728075	0.0591499	hypo
8	104465751	104466084	12253118	12253136	2034331	19	334	17.5789	-63.6104	-2.99417	-0.123995	0.466439	0.590435	0.0508917	hypo
18	8106853	8107635	23552765	23552790	745205	26	783	30.1154	63.6085	2.79936	0.144978	0.54502	0.400043	0.055592	hyper
15	38150768	38151326	20649327	20649346	571713	20	559	27.95	63.5852	3.49591	0.198731	0.549796	0.351064	0.0543561	hyper
20	16840846	16841417	25673680	25673709	974025	30	572	19.0667	-63.5813	-1.83502	-0.124645	0.730756	0.855401	0.0617502	hypo
6	114346946	114347534	9490477	9490498	1837215	22	589	26.7727	-63.5707	-1.79271	-0.158474	0.550164	0.708639	0.0646617	hypo
6	110649580	110650061	9425292	9425313	1835083	22	482	21.9091	-63.5535	-2.04468	-0.147569	0.443812	0.591381	0.0668838	hypo
6	12076726	12077401	8276912	8276932	1739808	21	676	32.1905	63.543	3.8028	0.161399	0.893299	0.731899	0.0513031	hyper
19	9257862	9258624	24522003	24522026	796840	24	763	31.7917	63.5054	3.22453	0.180447	0.592316	0.411869	0.0622388	hyper
19	48646779	48647837	25140318	25140341	825052	24	1059	44.125	-63.4839	-1.90979	-0.128571	0.526496	0.655068	0.0596698	hypo
9	88286019	88286799	13452887	13452918	2125715	32	781	24.4062	63.4779	2.07959	0.142177	0.780653	0.638476	0.0590624	hyper
29	19648005	19649094	33091375	33091400	1379263	26	1090	41.9231	-63.4759	-1.91903	-0.118121	0.530288	0.648409	0.053738	hypo
7	87386046	87387069	10627720	10627744	1917372	25	1024	40.96	-63.4639	-1.85898	-0.101863	0.170403	0.272265	0.0536853	hypo
18	48120865	48121592	24132088	24132116	776967	29	728	25.1034	-63.4115	-1.81286	-0.143423	0.478069	0.621492	0.0604272	hypo
13	81757868	81758799	18988846	18988878	466393	33	932	28.2424	63.4042	2.05958	0.141474	0.753145	0.611672	0.0535707	hyper
19	28715462	28716023	24835857	24835881	810517	25	562	22.48	-63.4032	-1.8268	-0.148751	0.502911	0.651662	0.052646	hypo
7	46636297	46636746	10132930	10132951	1878821	22	450	20.4545	-63.3993	-2.19571	-0.158743	0.303612	0.462356	0.0545349	hypo
3	117413421	117413910	5018282	5018304	1509308	23	490	21.3043	-63.3828	-2.05063	-0.133379	0.539712	0.673091	0.0545956	hypo
3	20426116	20426679	3812244	3812266	1420070	23	564	24.5217	-63.38	-1.84816	-0.139102	0.434974	0.574076	0.0596968	hypo
26	20255424	20255768	30991644	30991667	1264245	24	345	14.375	-63.3784	-2.00836	-0.100578	0.0945382	0.195116	0.0508787	hypo
7	5163011	5163327	9615351	9615375	1842983	25	317	12.68	63.376	2.7605	0.135578	0.718185	0.582608	0.051534	hyper
13	5454984	5455692	17797853	17797875	409402	23	709	30.8261	-63.3684	-1.92151	-0.145823	0.436562	0.582385	0.0589453	hypo
25	37487871	37488248	30655218	30655238	1242825	21	378	18	-63.3589	-2.06601	-0.121634	0.512543	0.634177	0.0508122	hypo
29	29556093	29556585	33217419	33217430	1388094	12	493	41.0833	63.3364	7.23598	0.285327	0.761278	0.475951	0.0599992	hyper
3	58493665	58494290	4261871	4261894	1456681	24	626	26.0833	-63.3222	-2.28321	-0.145322	0.599991	0.745313	0.0547918	hypo
10	85606099	85607595	14840286	14840318	226184	33	1497	45.3636	63.3181	2.16733	0.104275	0.758891	0.654616	0.0515449	hyper
24	2531283	2531952	29136166	29136191	1169618	26	670	25.7692	-63.3006	-1.86433	-0.168283	0.346435	0.514718	0.06764	hypo
18	7424207	7424842	23540613	23540638	744743	26	636	24.4615	63.2924	2.87363	0.135174	0.636312	0.501138	0.0548203	hyper
1	137446350	137447211	1545878	1545900	135791	23	862	37.4783	-63.2605	-1.80774	-0.105948	0.614048	0.719996	0.0513129	hypo
12	85121371	85121811	17687951	17687982	403373	32	441	13.7812	63.2336	2.06743	0.138607	0.707386	0.568778	0.057495	hyper
27	26847558	26848013	31872321	31872340	1309746	20	456	22.8	-63.2191	-2.42092	-0.254663	0.463226	0.717889	0.0708242	hypo
28	5980987	5981817	32283801	32283818	1327577	18	831	46.1667	63.2147	3.68199	0.230355	0.760192	0.529837	0.0502624	hyper
22	52631684	52632249	28118364	28118393	1124256	30	566	18.8667	-63.2009	-1.82822	-0.12684	0.587462	0.714302	0.0689187	hypo
18	65312244	65312928	24405257	24405277	787937	21	685	32.619	-63.196	-2.05574	-0.170168	0.197541	0.367709	0.0657124	hypo
9	20125822	20126980	12635456	12635483	2059614	28	1159	41.3929	63.1892	2.4566	0.14504	0.758996	0.613956	0.0543295	hyper
13	46103073	46104125	18413236	18413260	441305	25	1053	42.12	-63.1878	-1.96819	-0.102932	0.352571	0.455503	0.0539208	hypo
26	49202896	49203276	31446009	31446042	1285846	34	381	11.2059	63.1851	1.93975	0.114855	0.828844	0.713989	0.0539125	hyper
11	50153378	50153896	15795064	15795079	282852	16	519	32.4375	-63.1456	-3.40194	-0.158921	0.725371	0.884292	0.0508885	hypo
7	81785649	81786689	10567240	10567265	1911693	26	1041	40.0385	-63.1393	-1.79942	-0.103116	0.507846	0.610963	0.0554622	hypo
8	14848675	14849200	11152327	11152354	1950681	28	526	18.7857	-63.1298	-2.20604	-0.106364	0.119721	0.226085	0.0572782	hypo
12	32677707	32678668	17031612	17031633	356542	22	962	43.7273	-63.1074	-1.87943	-0.114678	0.390953	0.505631	0.0501561	hypo
24	34113757	34114354	29553147	29553171	1197961	25	598	23.92	-63.1027	-1.82692	-0.109875	0.553116	0.662991	0.0567874	hypo
19	49134162	49135465	25147898	25147922	825386	25	1304	52.16	63.0866	3.67037	0.151688	0.788196	0.636508	0.0500181	hyper
10	9212634	9213077	13880475	13880492	158101	18	444	24.6667	-63.0824	-3.31019	-0.256263	0.609765	0.866028	0.0624713	hypo
1	152782634	152783182	1781551	1781576	147085	26	549	21.1154	63.076	2.54235	0.14713	0.734201	0.58707	0.0539248	hyper
21	15130396	15131286	26581816	26581836	1036907	21	891	42.4286	-63.0425	-2.16404	-0.143129	0.518382	0.661511	0.0496575	hypo
24	60195146	60195816	29999459	29999493	1216222	35	671	19.1714	63.0306	1.94476	0.116916	0.719847	0.602931	0.0582163	hyper
17	68277435	68277847	23332542	23332564	737411	23	413	17.9565	-62.9727	-2.17046	-0.163878	0.427002	0.59088	0.0522323	hypo
4	101743329	101744365	6310618	6310641	1607724	24	1037	43.2083	62.9561	3.02	0.19444	0.567591	0.373151	0.0569099	hyper
24	58786061	58786611	29971810	29971835	1215299	26	551	21.1923	-62.8459	-1.81478	-0.124613	0.713108	0.837721	0.0509019	hypo
9	23142946	23143701	12670663	12670687	2062607	25	756	30.24	-62.8163	-2.03257	-0.112259	0.549177	0.661436	0.0646105	hypo
16	76495362	76495697	22313678	22313705	676745	28	336	12	62.7862	2.37647	0.132419	0.408774	0.276355	0.0510733	hyper
18	11018498	11018877	23604387	23604412	747032	26	380	14.6154	-62.7549	-1.82813	-0.110244	0.554678	0.664922	0.0520697	hypo
13	11027654	11028092	17878766	17878787	414049	22	439	19.9545	-62.7506	-2.31911	-0.10811	0.300601	0.408711	0.0535561	hypo
25	32407615	32408316	30565758	30565779	1239828	22	702	31.9091	62.7482	3.3053	0.228579	0.756865	0.528286	0.0529261	hyper
23	45327420	45327789	28932216	28932238	1164211	23	370	16.087	-62.7417	-1.83125	-0.111163	0.219901	0.331064	0.0520171	hypo
11	44324908	44325376	15709883	15709904	278338	22	469	21.3182	-62.7346	-2.2799	-0.105667	0.501414	0.607081	0.0512492	hypo
18	63389261	63389801	24369682	24369705	786808	24	541	22.5417	-62.7252	-1.95391	-0.103885	0.572619	0.676504	0.0514997	hypo
17	50820686	50821265	23027146	23027170	726114	25	580	23.2	62.7181	2.67993	0.14714	0.846558	0.699418	0.0666382	hyper
14	5659585	5661539	19107606	19107635	471003	30	1955	65.1667	-62.6931	-2.00112	-0.100203	0.626683	0.726886	0.054463	hypo
29	47486176	47486615	33500764	33500789	1400303	26	440	16.9231	-62.6808	-1.82096	-0.126286	0.718652	0.844938	0.056815	hypo
12	83693896	83694547	17653496	17653524	402731	29	652	22.4828	62.643	2.48688	0.136663	0.682091	0.545428	0.0607111	hyper
10	67398432	67398935	14590922	14590944	210327	23	504	21.913	-62.6199	-1.95137	-0.132383	0.613312	0.745695	0.0506403	hypo
10	6509200	6509615	13837604	13837623	155956	20	416	20.8	-62.5804	-2.30906	-0.120547	0.523083	0.64363	0.0538315	hypo
1	78377842	78378306	869384	869402	77979	19	465	24.4737	-62.5692	-1.89306	-0.212825	0.229603	0.442428	0.0731922	hypo
1	88089077	88089697	989387	989400	87074	14	621	44.3571	-62.5635	-4.00675	-0.229222	0.474625	0.703847	0.0548916	hypo
18	11929295	11929943	23619546	23619571	747556	26	649	24.9615	-62.5318	-1.88038	-0.117336	0.443373	0.560709	0.0522492	hypo
20	642546	643101	25430053	25430076	961031	24	556	23.1667	-62.5299	-1.94412	-0.103938	0.579821	0.683759	0.0591355	hypo
22	42889206	42889826	27975029	27975047	1116730	19	621	32.6842	62.5297	3.87933	0.193033	0.655399	0.462366	0.0523586	hyper
13	59233755	59234341	18592172	18592190	452022	19	587	30.8947	-62.5236	-1.94262	-0.135896	0.509283	0.645179	0.0616955	hypo
29	47394028	47394605	33498343	33498365	1400258	23	578	25.1304	-62.5018	-2.00925	-0.150165	0.359156	0.509321	0.0638143	hypo
24	30590852	30591177	29495727	29495749	1195337	23	326	14.1739	-62.4971	-1.97794	-0.176953	0.479414	0.656367	0.0616116	hypo
3	113628825	113630261	4942213	4942242	1507327	30	1437	47.9	62.4901	2.32401	0.145112	0.70484	0.559729	0.0516224	hyper
8	41242540	41243342	11455012	11455043	1976691	32	803	25.0938	62.4745	2.11771	0.103622	0.769253	0.665631	0.0508819	hyper
16	50563577	50564594	21930557	21930586	656086	30	1018	33.9333	-62.4641	-1.80119	-0.165366	0.287775	0.453141	0.0791156	hypo
2	108711261	108712333	3132747	3132761	940151	15	1073	71.5333	-62.4543	-3.05739	-0.30204	0.228218	0.530259	0.0550939	hypo
22	6185271	6185808	27443968	27443996	1086333	29	538	18.5517	62.4479	2.37913	0.113348	0.778192	0.664844	0.0493046	hyper
5	61207135	61208591	7337626	7337651	1679077	26	1457	56.0385	62.4421	2.91781	0.149785	0.713658	0.563873	0.0522885	hyper
14	4558520	4559074	19091570	19091584	470125	15	555	37	-62.4251	-3.36168	-0.205834	0.456226	0.66206	0.0561818	hypo
17	18400410	18400938	22662198	22662227	694708	30	529	17.6333	-62.3603	-1.81938	-0.163395	0.342926	0.506321	0.0786653	hypo
4	111911384	111912141	6452348	6452382	1616162	35	758	21.6571	62.324	1.91479	0.145017	0.75959	0.614572	0.0642913	hyper
27	32745602	32746177	31963131	31963156	1314428	26	576	22.1538	-62.3232	-1.87777	-0.125095	0.647428	0.772523	0.0656099	hypo
24	39304431	39305794	29631859	29631889	1202075	31	1364	44	62.3164	2.41248	0.112644	0.737108	0.624464	0.0522739	hyper
13	57833601	57834145	18567473	18567497	451196	25	545	21.8	62.3134	2.89873	0.160623	0.770437	0.609813	0.0600445	hyper
9	34372269	34372692	12809755	12809774	2073321	20	424	21.2	-62.3045	-2.33013	-0.145801	0.496584	0.642385	0.0533904	hypo
27	38354206	38354790	32064556	32064582	1317958	27	585	21.6667	-62.3	-1.97598	-0.139216	0.425207	0.564423	0.0727335	hypo
8	45409401	45410268	11510416	11510434	1980395	19	868	45.6842	-62.2662	-2.21988	-0.155799	0.645133	0.800932	0.0513297	hypo
6	58494533	58495681	8799006	8799025	1785859	20	1149	57.45	-62.2568	-2.59768	-0.139169	0.257485	0.396654	0.0508068	hypo
X	133727578	133728304	34922447	34922474	2260676	28	727	25.9643	62.2477	2.67837	0.127573	0.804552	0.676979	0.0518892	hyper
13	47330097	47331091	18433438	18433465	442196	28	995	35.5357	62.2452	2.37233	0.141308	0.699975	0.558668	0.0529902	hyper
7	108416863	108417712	10915306	10915331	1936169	26	850	32.6923	-62.2305	-1.85241	-0.121875	0.618438	0.740313	0.0611945	hypo
2	133177162	133177555	3495826	3495851	958911	26	394	15.1538	-62.2277	-1.887	-0.10097	0.536149	0.637119	0.0525659	hypo
6	55341276	55342352	8759936	8759965	1782914	30	1077	35.9	-62.2258	-1.83009	-0.120795	0.597407	0.718201	0.0575095	hypo
2	129184725	129185074	3424156	3424173	956624	18	350	19.4444	62.1955	3.98681	0.179406	0.874632	0.695226	0.050157	hyper
23	40748871	40749376	28841987	28842004	1161604	18	506	28.1111	62.1826	3.92332	0.170652	0.729951	0.5593	0.0527204	hyper
10	947604	947909	13760172	13760185	151338	14	306	21.8571	62.1693	5.30065	0.179489	0.565073	0.385584	0.0568765	hyper
12	76662133	76662366	17526190	17526219	397916	30	234	7.8	-62.155	-1.95028	-0.187193	0.260289	0.447482	0.0861881	hypo
14	19754835	19755532	19324726	19324749	481765	24	698	29.0833	-62.1458	-1.79317	-0.124665	0.233901	0.358567	0.0624327	hypo
9	101897203	101897667	13696381	13696411	2135065	31	465	15	62.1277	2.16223	0.147508	0.655485	0.507977	0.0634668	hyper
23	43358002	43358649	28894442	28894469	1163031	28	648	23.1429	62.0989	2.5573	0.169035	0.826265	0.65723	0.0539805	hyper
11	48172648	48173411	15765624	15765643	281349	20	764	38.2	62.0804	3.32478	0.204293	0.639273	0.43498	0.0633383	hyper
7	15095671	15096526	9742746	9742770	1851036	25	856	34.24	62.0728	2.91939	0.139175	0.503134	0.363959	0.0556155	hyper
29	9696812	9697362	32963363	32963391	1370204	29	551	19	62.0674	2.35267	0.152687	0.653317	0.50063	0.0545093	hyper
13	59851522	59852677	18602878	18602898	452409	21	1156	55.0476	-62.0579	-1.82829	-0.140231	0.475829	0.61606	0.0562082	hypo
23	51683327	51683733	29072243	29072268	1167587	26	407	15.6538	62.0493	2.66269	0.151918	0.770553	0.618635	0.0499819	hyper
26	27241813	27243174	31083485	31083511	1270181	27	1362	50.4444	62.044	2.74239	0.21645	0.507985	0.291535	0.0645287	hyper
1	79064877	79065547	878252	878275	78638	24	671	27.9583	62.044	2.91237	0.144285	0.761984	0.617698	0.0506044	hyper
9	87912991	87913808	13446081	13446107	2125476	27	818	30.2963	62.0114	2.76482	0.190677	0.606538	0.41586	0.0662654	hyper
7	40552884	40553296	10063858	10063881	1873608	24	413	17.2083	-61.96	-1.81338	-0.104789	0.568234	0.673023	0.0521308	hypo
23	45445686	45446375	28934953	28934974	1164279	22	690	31.3636	61.9379	2.96386	0.191544	0.530537	0.338993	0.0562873	hyper
21	57611532	57611976	27141980	27142005	1073963	26	445	17.1154	-61.915	-1.81711	-0.207626	0.465547	0.673173	0.0732871	hypo
23	49365105	49365581	29017302	29017325	1166441	24	477	19.875	-61.914	-2.05949	-0.143235	0.639652	0.782888	0.0565662	hypo
18	23388095	23388990	23795120	23795141	755928	22	896	40.7273	61.9133	3.53046	0.189949	0.64157	0.451621	0.0560189	hyper
16	4550363	4550690	21357892	21357912	614604	21	328	15.619	61.9089	3.27657	0.155519	0.715481	0.559961	0.0547001	hyper
2	95917750	95917924	2981339	2981360	927994	22	175	7.95455	-61.8961	-2.32916	-0.152837	0.512513	0.66535	0.0598529	hypo
13	80634606	80635022	18959576	18959599	465975	24	417	17.375	-61.8906	-1.99293	-0.129018	0.455277	0.584296	0.0580005	hypo
25	12876984	12877395	30259753	30259776	1225459	24	412	17.1667	-61.8885	-2.23742	-0.12341	0.449646	0.573056	0.0648052	hypo
5	26094695	26094888	6924456	6924480	1645861	25	194	7.76	-61.8843	-2.41601	-0.158256	0.139209	0.297466	0.0539614	hypo
4	18605819	18607432	5311003	5311029	1527835	27	1614	59.7778	61.8801	2.53292	0.108795	0.491242	0.382447	0.052392	hyper
5	50878494	50879110	7226577	7226597	1668865	21	617	29.381	-61.8417	-1.80385	-0.14191	0.681014	0.822925	0.0522691	hypo
24	61158143	61158712	30021102	30021126	1216751	25	570	22.8	-61.8389	-2.00163	-0.119907	0.368176	0.488083	0.0558661	hypo
23	4475888	4476656	28324577	28324600	1133003	24	769	32.0417	-61.8364	-1.92686	-0.110393	0.362479	0.472872	0.0600629	hypo
11	9775968	9777073	15287718	15287744	246039	27	1106	40.963	-61.8259	-1.79807	-0.128135	0.653005	0.78114	0.0520055	hypo
9	18497996	18498523	12612075	12612094	2058226	20	528	26.4	-61.8176	-2.86549	-0.190375	0.634136	0.824511	0.0627438	hypo
5	57983108	57984351	7305486	7305500	1675849	15	1244	82.9333	-61.7969	-3.31762	-0.288172	0.395494	0.683666	0.0602401	hypo
16	4518038	4518731	21357223	21357243	614591	21	694	33.0476	61.7905	3.29186	0.149403	0.637137	0.487734	0.0501743	hyper
23	46348083	46349202	28952096	28952118	1164827	23	1120	48.6957	-61.7668	-1.94694	-0.151297	0.431337	0.582634	0.0720834	hypo
1	139052397	139053617	1562383	1562406	137434	24	1221	50.875	-61.7445	-2.29155	-0.129332	0.587207	0.716539	0.0550995	hypo
22	39090123	39090484	27917833	27917860	1113667	28	362	12.9286	-61.7414	-1.83625	-0.115869	0.474443	0.590313	0.0635313	hypo
23	45018190	45019816	28925467	28925493	1164059	27	1627	60.2593	-61.7218	-1.81857	-0.129685	0.606755	0.736441	0.0586814	hypo
17	40171700	40172306	22881553	22881571	717162	19	607	31.9474	-61.7172	-2.3287	-0.151523	0.484933	0.636455	0.0530237	hypo
1	113030540	113031602	1260017	1260045	112257	29	1063	36.6552	61.7063	2.30323	0.157569	0.60865	0.451082	0.0497099	hyper
17	60598528	60599359	23190418	23190438	732811	21	832	39.619	-61.7017	-1.80032	-0.148831	0.43838	0.587212	0.0588294	hypo
17	62552384	62553016	23222261	23222286	734150	26	633	24.3462	61.688	2.58649	0.159074	0.724196	0.565122	0.0539099	hyper
24	48683407	48684148	29785643	29785665	1208706	23	742	32.2609	-61.6811	-1.95527	-0.137296	0.553655	0.69095	0.0513391	hypo
22	53823669	53824452	28139504	28139523	1125031	20	784	39.2	-61.6681	-2.30028	-0.154019	0.40107	0.555089	0.0504448	hypo
6	26376546	26376879	8460123	8460140	1753184	18	334	18.5556	61.6563	4.25462	0.196785	0.686585	0.4898	0.0526785	hyper
11	78983466	78983956	16137059	16137074	310076	16	491	30.6875	-61.6455	-2.31973	-0.167357	0.420204	0.587561	0.0545545	hypo
16	51685823	51686322	21944613	21944639	656860	27	500	18.5185	-61.6358	-1.96367	-0.116261	0.346662	0.462923	0.0522609	hypo
22	57912825	57913303	28218556	28218579	1127321	24	479	19.9583	61.6226	2.96846	0.180156	0.813523	0.633367	0.0622544	hyper
13	77820083	77820697	18895083	18895104	464689	22	615	27.9545	61.5987	3.32355	0.168	0.656949	0.488949	0.0505405	hyper
7	80600790	80601902	10550994	10551016	1910620	23	1113	48.3913	61.5945	2.80816	0.210964	0.943412	0.732448	0.0538372	hyper
9	33251849	33252275	12794773	12794787	2072304	15	427	28.4667	-61.5931	-2.45872	-0.258154	0.506306	0.76446	0.0617503	hypo
1	80691706	80692758	900363	900384	80049	22	1053	47.8636	61.5801	3.15772	0.135198	0.865983	0.730785	0.0510586	hyper
19	31383141	31383676	24882624	24882645	812133	22	536	24.3636	-61.5773	-1.82257	-0.194231	0.297015	0.491246	0.0841283	hypo
19	19200331	19200933	24685515	24685537	803938	23	603	26.2174	-61.5362	-2.1207	-0.16727	0.624424	0.791694	0.0585437	hypo
27	15103277	15103849	31700374	31700401	1299815	28	573	20.4643	61.5247	2.57719	0.147554	0.513676	0.366121	0.0567174	hyper
7	15718251	15718749	9753615	9753631	1851395	17	499	29.3529	-61.5144	-2.72349	-0.152936	0.312906	0.465842	0.0518986	hypo
26	9848754	9849656	30849402	30849422	1255339	21	903	43	-61.5099	-1.95763	-0.136759	0.547741	0.6845	0.0524522	hypo
7	46692402	46693082	10133942	10133964	1878851	23	681	29.6087	-61.4829	-1.83929	-0.107297	0.597804	0.705101	0.0561702	hypo
1	81784430	81785247	915621	915645	80987	25	818	32.72	-61.4761	-1.93275	-0.131781	0.611913	0.743694	0.0613021	hypo
2	115158842	115159443	3213780	3213803	946130	24	602	25.0833	-61.476	-2.16178	-0.11481	0.660704	0.775515	0.0597877	hypo
23	29442352	29443189	28677073	28677090	1152095	18	838	46.5556	61.4684	4.23212	0.195896	0.732077	0.536181	0.0513517	hyper
12	21629780	21630450	16857027	16857046	348085	20	671	33.55	-61.4518	-2.61139	-0.154046	0.506808	0.660854	0.0498446	hypo
14	13915364	13916125	19239781	19239810	476920	30	762	25.4	61.4411	2.31567	0.10391	0.662482	0.558572	0.0511882	hyper
17	41983133	41984169	22901249	22901266	718975	18	1037	57.6111	61.4406	4.05501	0.264427	0.610167	0.345741	0.0580955	hyper
1	154018474	154018904	1806223	1806252	147804	30	431	14.3667	61.4325	2.25917	0.148583	0.806779	0.658196	0.0525714	hyper
20	4238929	4239583	25491115	25491137	963504	23	655	28.4783	61.4297	3.15372	0.156826	0.66143	0.504605	0.0521639	hyper
15	43003662	43004665	20717945	20717967	575747	23	1004	43.6522	-61.4245	-1.85241	-0.108405	0.606892	0.715298	0.0527029	hypo
29	37216995	37217995	33348368	33348389	1393050	22	1001	45.5	-61.4208	-2.17723	-0.1482	0.409324	0.557525	0.0593439	hypo
11	98830398	98831086	16435754	16435779	325059	26	689	26.5	61.4149	2.75415	0.116418	0.73593	0.619512	0.0505065	hyper
24	704964	705308	29098781	29098797	1168604	17	345	20.2941	-61.4135	-2.71979	-0.194161	0.418473	0.612635	0.0520343	hypo
3	66412733	66413344	4341935	4341956	1464916	22	612	27.8182	-61.4092	-2.61047	-0.13417	0.583674	0.717844	0.0594057	hypo
3	120800561	120801183	5069836	5069862	1511278	27	623	23.0741	-61.4036	-2.08695	-0.147939	0.562903	0.710842	0.0671044	hypo
X	86620607	86621974	34374143	34374171	2215994	29	1368	47.1724	61.4029	2.3982	0.1426	0.689094	0.546494	0.0510836	hyper
3	69472754	69473627	4376237	4376258	1468005	22	874	39.7273	-61.3947	-1.94646	-0.136399	0.364386	0.500785	0.0487889	hypo
1	142066833	142067324	1603478	1603509	139940	32	492	15.375	-61.3915	-1.79721	-0.156094	0.393738	0.549832	0.0775437	hypo
15	66894520	66895193	21014862	21014884	597023	23	674	29.3043	-61.3848	-2.04903	-0.137781	0.541107	0.678888	0.0542643	hypo
23	42112345	42113276	28868334	28868355	1162378	22	932	42.3636	-61.3833	-1.99365	-0.139901	0.647464	0.787366	0.054549	hypo
6	90996610	90996725	9153806	9153821	1818451	16	116	7.25	61.3674	3.85683	0.303283	0.890437	0.587154	0.0554136	hyper
12	31739782	31740657	17014697	17014712	355963	16	876	54.75	-61.348	-2.19386	-0.209289	0.473636	0.682925	0.0535539	hypo
2	128036483	128037139	3404340	3404365	955890	26	657	25.2692	61.3227	2.81813	0.125849	0.548298	0.422449	0.067221	hyper
19	9564294	9565128	24527004	24527027	797041	24	835	34.7917	61.31	3.39581	0.171598	0.773224	0.601626	0.0597916	hyper
7	88308414	88309119	10640369	10640391	1918209	23	706	30.6957	-61.3095	-1.93547	-0.160192	0.409419	0.569611	0.0662582	hypo
6	103577547	103578191	9328023	9328054	1829192	32	645	20.1562	61.2676	2.03388	0.15191	0.739812	0.587902	0.0543701	hyper
11	6517856	6518534	15234486	15234511	243723	26	679	26.1154	61.247	2.80271	0.162804	0.436403	0.273599	0.0550733	hyper
11	97947235	97948392	16421480	16421507	324495	28	1158	41.3571	61.2404	2.64833	0.15079	0.646896	0.496106	0.0519898	hyper
X	136309251	136309675	34982621	34982642	2261670	22	425	19.3182	-61.2328	-1.91012	-0.115626	0.165496	0.281121	0.0476303	hypo
24	45287421	45287804	29729461	29729490	1206405	30	384	12.8	-61.2102	-1.80674	-0.108391	0.190333	0.298724	0.063781	hypo
6	60782283	60782885	8832620	8832641	1787786	22	603	27.4091	61.1997	3.02457	0.134701	0.753911	0.61921	0.0507347	hyper
19	51149235	51150382	25181478	25181506	826636	29	1148	39.5862	61.1982	2.85047	0.129672	0.899277	0.769605	0.0502676	hyper
11	27211143	27212339	15511539	15511561	261824	23	1197	52.0435	61.1954	3.29532	0.141733	0.659446	0.517714	0.0500421	hyper
19	28893516	28893760	24839688	24839705	810603	18	245	13.6111	-61.1685	-2.82844	-0.18923	0.596976	0.786205	0.060364	hypo
24	44294796	44295319	29715708	29715733	1205558	26	524	20.1538	-61.1631	-1.87591	-0.136561	0.458649	0.595211	0.0592338	hypo
16	41859277	41859734	21804473	21804502	649991	30	458	15.2667	61.1409	2.18853	0.117045	0.873847	0.756803	0.0601435	hyper
17	56076096	56076847	23115751	23115783	729716	33	752	22.7879	61.1399	1.90863	0.165402	0.539898	0.374495	0.0667417	hyper
8	16912710	16913337	11177653	11177678	1952637	26	628	24.1538	61.1325	2.56449	0.126167	0.471743	0.345575	0.0594719	hyper
29	37153817	37155002	33347527	33347554	1392997	28	1186	42.3571	61.1273	2.39916	0.112569	0.647427	0.534859	0.0580877	hyper
1	87421628	87422599	980680	980702	86436	23	972	42.2609	61.1042	3.03879	0.196714	0.898441	0.701726	0.0497186	hyper
10	3956707	3957268	13798818	13798844	153975	27	562	20.8148	-61.0861	-1.85423	-0.116019	0.329864	0.445883	0.0607866	hypo
23	29904376	29904768	28681198	28681218	1152575	21	393	18.7143	-61.0856	-2.72778	-0.200804	0.613018	0.813822	0.0541427	hypo
X	135679162	135679816	34967796	34967821	2261429	26	655	25.1923	-61.0768	-1.91933	-0.159964	0.55548	0.715444	0.0705365	hypo
25	38013436	38014074	30666588	30666612	1243081	25	639	25.56	61.0649	2.92006	0.118999	0.651234	0.532235	0.0492835	hyper
10	26160471	26160962	14098085	14098105	170775	21	492	23.4286	61.0615	3.14331	0.260896	0.45336	0.192464	0.0656746	hyper
19	55749277	55749764	25260466	25260487	829333	22	488	22.1818	61.0337	3.30855	0.131747	0.55151	0.419763	0.0512856	hyper
3	4375391	4375867	3611158	3611177	1406009	20	477	23.85	-61.0061	-2.33642	-0.145684	0.626474	0.772158	0.061154	hypo
13	77373626	77373829	18885767	18885781	464468	15	204	13.6	-60.9932	-3.66032	-0.262312	0.148101	0.410412	0.0638495	hypo
24	59785299	59785946	29990005	29990028	1215997	24	648	27	-60.9589	-2.07434	-0.101967	0.497601	0.599568	0.0567565	hypo
28	2167499	2167891	32230691	32230715	1324461	25	393	15.72	-60.954	-1.97875	-0.139157	0.433379	0.572536	0.0544144	hypo
3	7860842	7861313	3652446	3652461	1409287	16	472	29.5	60.936	4.43892	0.235024	0.576413	0.341389	0.0556819	hyper
24	43543725	43544371	29708480	29708500	1204772	21	647	30.8095	60.9342	3.28631	0.174816	0.666851	0.492035	0.0507087	hyper
22	5124977	5125521	27426184	27426205	1085581	22	545	24.7727	-60.9339	-2.1468	-0.136777	0.655664	0.792441	0.0565839	hypo
18	10958067	10958676	23603233	23603256	747005	24	610	25.4167	60.9243	3.12823	0.125874	0.679553	0.55368	0.0517621	hyper
12	34379939	34380289	17064056	17064077	357573	22	351	15.9545	60.9204	3.11416	0.135278	0.771698	0.63642	0.0497514	hyper
29	29754078	29755304	33221134	33221148	1388203	15	1227	81.8	60.9154	4.43872	0.284672	0.762993	0.478321	0.0604117	hyper
12	82539904	82540703	17629704	17629732	402027	29	800	27.5862	60.9038	2.36665	0.126206	0.591697	0.465491	0.0512771	hyper
16	74703640	74704504	22281119	22281149	675524	31	865	27.9032	60.8909	2.04062	0.210946	0.682224	0.471278	0.0505752	hyper
18	41926654	41927713	24043953	24043982	772055	30	1060	35.3333	60.8887	2.23365	0.124258	0.669907	0.545649	0.0536448	hyper
12	15006860	15007148	16751683	16751700	343165	18	289	16.0556	-60.8751	-2.11922	-0.20337	0.482567	0.685937	0.0658667	hypo
17	67223478	67223729	23316179	23316206	736575	28	252	9	-60.8605	-1.91275	-0.119858	0.354696	0.474555	0.061192	hypo
26	21550521	21550792	31010077	31010104	1265350	28	272	9.71429	-60.854	-1.87696	-0.107212	0.215728	0.32294	0.0556361	hypo
3	30649970	30650508	3951380	3951405	1428962	26	539	20.7308	60.8433	2.42363	0.129209	0.612325	0.483116	0.0509651	hyper
16	61344631	61345252	22074571	22074596	665181	26	622	23.9231	-60.8341	-1.81681	-0.11997	0.557859	0.677828	0.0484719	hypo
4	119079542	119080036	6588115	6588140	1620303	26	495	19.0385	60.8338	2.61479	0.147055	0.794385	0.64733	0.0555252	hyper
3	91664289	91664983	4633167	4633194	1489668	28	695	24.8214	60.8168	2.4226	0.16135	0.757825	0.596474	0.0504288	hyper
24	12201947	12203069	29278186	29278209	1177784	24	1123	46.7917	-60.8099	-1.91548	-0.125874	0.62901	0.754884	0.0519621	hypo
18	48511271	48511579	24137904	24137925	777256	22	309	14.0455	-60.7813	-1.86977	-0.113426	0.729042	0.842468	0.0543166	hypo
18	43908794	43909404	24076454	24076481	773452	28	611	21.8214	60.781	2.39766	0.165608	0.832098	0.66649	0.062218	hyper
8	11656200	11656847	11119911	11119932	1947322	22	648	29.4545	-60.7725	-2.34084	-0.185683	0.462927	0.64861	0.0641203	hypo
9	89447449	89447892	13471106	13471129	2126654	24	444	18.5	-60.7539	-1.90717	-0.1142	0.47546	0.58966	0.0526641	hypo
6	22123904	22124444	8407058	8407083	1749160	26	541	20.8077	-60.7081	-1.97428	-0.173285	0.732809	0.906095	0.0680539	hypo
13	22464269	22464667	18053234	18053260	423196	27	399	14.7778	60.6961	2.54475	0.165333	0.812775	0.647442	0.0516433	hyper
11	4474009	4475279	15196457	15196480	242542	24	1271	52.9583	60.692	2.90289	0.140843	0.738946	0.598102	0.0513002	hyper
2	15510169	15510899	2057272	2057299	848371	28	731	26.1071	60.6903	2.4149	0.127798	0.520754	0.392956	0.0608647	hyper
9	77287999	77289235	13310575	13310597	2115834	23	1237	53.7826	-60.6861	-2.02381	-0.222816	0.623827	0.846643	0.057949	hypo
29	15638877	15640115	33036312	33036336	1375850	25	1239	49.56	60.6772	2.68752	0.14525	0.56491	0.41966	0.0538227	hyper
1	126375015	126376034	1409402	1409423	125593	22	1020	46.3636	60.6644	3.37289	0.18154	0.685778	0.504238	0.0526085	hyper
18	24123093	24124193	23806803	23806833	756459	31	1101	35.5161	60.6365	2.27309	0.126557	0.698962	0.572405	0.0655952	hyper
23	31893293	31893920	28711394	28711416	1154215	23	628	27.3043	60.6124	3.39746	0.144079	0.309385	0.165306	0.0498369	hyper
1	144629290	144629776	1644521	1644551	141555	31	487	15.7097	60.5892	2.14009	0.112975	0.648704	0.535729	0.0524143	hyper
4	82297003	82297419	6063219	6063239	1590098	21	417	19.8571	-60.5786	-2.55019	-0.118456	0.259376	0.377832	0.0520962	hypo
20	39524013	39525437	25953157	25953184	995773	28	1425	50.8929	60.5358	2.41984	0.135322	0.661948	0.526626	0.0518542	hyper
7	38496875	38497199	10039140	10039160	1871790	21	325	15.4762	-60.5308	-1.91683	-0.148348	0.67607	0.824418	0.0500303	hypo
19	8721584	8722345	24515272	24515292	796384	21	762	36.2857	-60.5057	-1.79779	-0.168705	0.271523	0.440228	0.0630091	hypo
24	12469842	12470132	29281702	29281719	1178009	18	291	16.1667	-60.4872	-3.26616	-0.219722	0.326422	0.546144	0.0674275	hypo
12	16519706	16520418	16778919	16778946	344138	28	713	25.4643	60.4832	2.3968	0.104533	0.83132	0.726787	0.0576798	hyper
23	37700851	37701560	28791470	28791491	1159362	22	710	32.2727	-60.4687	-1.86072	-0.11226	0.569326	0.681586	0.0563252	hypo
10	4281435	4282294	13804209	13804230	154215	22	860	39.0909	60.4641	3.62209	0.160764	0.533421	0.372657	0.0517923	hyper
13	31896422	31897008	18188637	18188660	431030	24	587	24.4583	-60.4472	-1.80682	-0.113883	0.365753	0.479636	0.0538132	hypo
3	91650753	91651455	4633016	4633034	1489658	19	703	37	60.4415	3.96653	0.210187	0.834561	0.624374	0.0512413	hyper
29	34468823	34470113	33300009	33300033	1391368	25	1291	51.64	-60.4377	-1.79569	-0.128917	0.389962	0.51888	0.066322	hypo
21	16345182	16345574	26601948	26601969	1037748	22	393	17.8636	-60.4344	-2.2443	-0.12386	0.698813	0.822673	0.0492379	hypo
22	7465780	7466686	27469204	27469223	1087026	20	907	45.35	60.4297	4.47385	0.220606	0.857623	0.637017	0.0532874	hyper
3	78463058	78464494	4465611	4465634	1477525	24	1437	59.875	60.4046	3.05684	0.322773	0.81598	0.493207	0.0570004	hyper
1	42997379	42997810	465334	465363	43037	30	432	14.4	-60.3873	-1.79505	-0.109119	0.560594	0.669713	0.0803438	hypo
17	48309767	48310093	22988076	22988095	724216	20	327	16.35	-60.375	-2.08124	-0.156329	0.153672	0.310001	0.0575496	hypo
8	102915000	102915991	12225695	12225723	2033363	29	992	34.2069	60.3732	2.21302	0.161502	0.730384	0.568881	0.0508841	hyper
28	31332886	31333313	32609203	32609226	1350598	24	428	17.8333	-60.3653	-2.03862	-0.114552	0.668217	0.782768	0.0502811	hypo
22	35145831	35146697	27859771	27859796	1110379	26	867	33.3462	-60.3547	-1.89605	-0.116264	0.533843	0.650108	0.0485662	hypo
12	32760104	32761215	17033522	17033552	356572	31	1112	35.871	60.3424	2.27291	0.126852	0.699904	0.573052	0.0638076	hyper
27	32475077	32475848	31957830	31957853	1314281	24	772	32.1667	60.3374	3.20989	0.197676	0.714105	0.516429	0.0508433	hyper
22	36761408	36761917	27882313	27882336	1111789	24	510	21.25	-60.3339	-2.36559	-0.147656	0.0711119	0.218768	0.0658665	hypo
2	95466788	95467674	2975348	2975369	927589	22	887	40.3182	-60.3253	-1.85431	-0.173856	0.401033	0.574888	0.071781	hypo
9	12204692	12205335	12536821	12536848	2052291	28	644	23	-60.3177	-1.79227	-0.110424	0.51371	0.624134	0.0517576	hypo
19	40575285	40575603	25021331	25021354	818913	24	319	13.2917	-60.2946	-2.09989	-0.187019	0.180665	0.367684	0.0723718	hypo
16	43825569	43826004	21835640	21835660	651388	21	436	20.7619	-60.2938	-2.04313	-0.14355	0.333197	0.476747	0.0595495	hypo
13	5445195	5445901	17797644	17797663	409392	20	707	35.35	-60.2623	-1.99442	-0.146404	0.415315	0.561719	0.055017	hypo
29	49762079	49762556	33536135	33536160	1401470	26	478	18.3846	-60.2621	-1.81989	-0.143094	0.561662	0.704755	0.0759277	hypo
6	111297311	111298954	9437050	9437070	1835492	21	1644	78.2857	-60.2514	-1.79895	-0.113038	0.594853	0.70789	0.0524428	hypo
18	33464025	33465369	23919622	23919649	765339	28	1345	48.0357	60.2454	2.44958	0.159982	0.722521	0.562539	0.0507704	hyper
4	607773	608012	5081504	5081526	1511747	23	240	10.4348	-60.2194	-1.86539	-0.153272	0.163684	0.316957	0.0697936	hypo
17	40395140	40395726	22885161	22885180	717324	20	587	29.35	60.2194	3.40559	0.162114	0.72723	0.565117	0.0507138	hyper
13	38297599	38298537	18285880	18285900	435998	21	939	44.7143	60.1801	4.32805	0.168741	0.654243	0.485502	0.0503376	hyper
24	2510682	2511194	29135639	29135660	1169611	22	513	23.3182	60.1579	3.38238	0.185613	0.671386	0.485773	0.0517037	hyper
4	95278378	95278928	6216447	6216465	1602453	19	551	29	-60.1565	-2.37024	-0.146327	0.440823	0.58715	0.0553529	hypo
[truncated: 33,778 more rows]

## Sheet: SC vs. HC_DMRs
The information of DMRs among subclinical and healthy group
[truncated: 33,928 more rows]

## Sheet: DMGs
The information of DMGs among clinical, subclinical and healthy groups
[truncated: 4,338 more rows]

[truncated: 1 more sheets: PDMGs]
