# Supplementary material for: Genome-Wide DNA Methylation Profile in Jejunum Reveals the Potential Genes Associated With Paratuberculosis in Dairy Cattle
Source: Front Genet. 2021 Oct 15;12:735147. doi: 10.3389/fgene.2021.735147 (PMC8554095; doi:10.3389/fgene.2021.735147)
Supplement: Supplementary file 2 [file Table3.XLSX]

## Sheet: CC vs. SC GO Terms (DMGs)
The significant GO terms among clinical and subclinical group
ONTOLOGY	ID	Description	GeneRatio	BgRatio	pvalue	p.adjust	qvalue	geneID	Count
BP	GO:0022603	regulation of anatomical structure morphogenesis	76/1202	181/4493	4.24355e-06	4.24355e-06	0.0105195	280820/538314/508266/616246/280794/281573/338052/100141021/523206/535344/512660/281511/281139/512254/511691/280677/789618/327682/538474/281136/280939/327662/533746/527263/407238/281574/534894/541281/407216/539430/534027/282021/282091/505169/784675/504784/286849/615785/532663/505423/281126/280685/506110/100139484/282126/508062/282001/282173/317655/282170/445543/281296/511582/505242/281935/282178/6…	76
BP	GO:0032989	cellular component morphogenesis	69/1202	169/4493	3.60705e-05	3.60705e-05	0.039527	511034/282048/538314/508266/616246/280794/281573/338052/100141021/523206/512660/281601/281577/281511/280746/534475/512254/282029/511691/789618/509769/538474/281136/280939/327662/533746/527263/281574/533622/534894/281663/524770/512029/282378/534027/514886/504437/538602/615785/532663/536810/280685/506110/100139484/505840/533228/282126/508062/282173/317655/281515/282170/281296/505242/281935/613997/3…	69
BP	GO:0048858	cell projection morphogenesis	37/1202	78/4493	6.37803e-05	6.37803e-05	0.039527	511034/282048/508266/281573/100141021/523206/512660/281601/281577/281511/282029/511691/509769/538474/533746/527263/534894/512029/282378/534027/504437/538602/615785/532663/506110/100139484/282126/282173/281296/613997/617510/506612/520488/281555/515757/507389/505066	37
BP	GO:0120039	plasma membrane bounded cell projection morphogenesis	37/1202	78/4493	6.37803e-05	6.37803e-05	0.039527	511034/282048/508266/281573/100141021/523206/512660/281601/281577/281511/282029/511691/509769/538474/533746/527263/534894/512029/282378/534027/504437/538602/615785/532663/506110/100139484/282126/282173/281296/613997/617510/506612/520488/281555/515757/507389/505066	37
BP	GO:0000902	cell morphogenesis	61/1202	149/4493	9.29335e-05	9.29335e-05	0.039649	511034/282048/538314/508266/616246/280794/281573/338052/100141021/523206/512660/281601/281577/281511/512254/282029/511691/789618/509769/538474/281136/280939/327662/533746/527263/281574/534894/512029/282378/534027/514886/504437/538602/615785/532663/280685/506110/100139484/505840/533228/282126/508062/282173/317655/281515/282170/281296/505242/281935/613997/338049/617510/617525/506612/520488/281555/5…	61
BP	GO:0032990	cell part morphogenesis	38/1202	82/4493	9.59657e-05	9.59657e-05	0.039649	511034/282048/508266/281573/100141021/523206/512660/281601/281577/281511/282029/511691/509769/538474/533746/527263/533622/534894/512029/282378/534027/504437/538602/615785/532663/506110/100139484/282126/282173/281296/613997/617510/506612/520488/281555/515757/507389/505066	38
CC	GO:0044459	plasma membrane part	157/1224	438/4725	8.57622e-07	8.57622e-07	0.000324091	526133/511034/282147/281038/338037/281777/414922/517077/282644/338068/526088/281598/281753/338070/539387/282452/504974/513152/281135/282368/539935/281123/407209/281067/281052/281601/281511/509790/282348/280746/282239/282651/282360/534560/280834/281700/511956/788252/281973/281783/540657/538745/509080/511691/281276/789618/327682/516087/281136/280939/327662/281078/281781/535127/281574/519461/510026/…	157
CC	GO:0042995	cell projection	150/1224	446/4725	8.1759e-05	8.1759e-05	0.011325	280722/511034/282147/281038/338037/281047/281777/527583/613455/504482/517077/281573/536462/100141021/517552/540726/534169/513152/532836/407209/281478/509032/281052/281577/617147/327671/282348/618379/282651/280834/281225/281700/533223/788252/281973/281783/511691/789618/509769/327682/528315/538474/515437/280939/327662/281781/535127/527263/281958/281574/533622/534894/535311/524770/536359/767602/7676…	150
CC	GO:0098590	plasma membrane region	95/1224	262/4725	8.99063e-05	8.99063e-05	0.011325	511034/282147/338037/281777/414922/517077/526088/281753/338070/504974/513152/407209/281067/281052/281601/281511/509790/282348/282239/282360/280834/281700/788252/281973/540657/509080/281276/280939/327662/281781/535127/281574/519461/535311/281553/526585/281950/337925/508723/407230/281509/282021/540853/541217/281876/511839/511940/534816/281971/281881/281201/281198/282346/327672/532261/511832/444867/…	95
CC	GO:0120025	plasma membrane bounded cell projection	140/1224	421/4725	0.000259028	0.000259028	0.0244713	280722/511034/282147/281038/338037/281047/281777/527583/613455/504482/517077/281573/536462/100141021/517552/540726/534169/513152/532836/407209/509032/281052/281577/617147/327671/282348/618379/282651/280834/281225/281700/788252/281973/281783/511691/509769/327682/528315/538474/515437/280939/327662/281781/535127/527263/281958/281574/533622/534894/535311/524770/536359/767602/767615/512029/513228/5089…	140
CC	GO:1902495	transmembrane transporter complex	29/1224	63/4725	0.000409523	0.000409523	0.0283114	526133/526088/281123/281067/282348/282239/281700/281783/540657/510026/513316/514460/281884/535990/281881/541597/281198/767943/282179/781184/523515/282178/530577/281696/515646/538496/507899/282573/505563	29
CC	GO:0005887	integral component of plasma membrane	55/1224	142/4725	0.000449513	0.000449513	0.0283114	281038/414922/282644/338068/526088/338070/539387/282452/282368/281123/281067/281601/282348/282239/282651/534560/511956/281783/540657/516087/281136/510026/513316/407154/541217/281884/535990/534816/505423/281881/281346/281486/541597/281198/282346/338036/282363/515527/282365/282179/781184/507339/526766/282178/515911/530577/507783/281062/493988/538496/281588/281874/282573/505563/511435	55
CC	GO:1990351	transporter complex	29/1224	64/4725	0.000566714	0.000566714	0.0300204	526133/526088/281123/281067/282348/282239/281700/281783/540657/510026/513316/514460/281884/535990/281881/541597/281198/767943/282179/781184/523515/282178/530577/281696/515646/538496/507899/282573/505563	29
CC	GO:0034702	ion channel complex	27/1224	59/4725	0.000720393	0.000720393	0.0300204	526133/526088/281123/281067/282348/282239/281783/540657/513316/514460/281884/535990/281881/541597/281198/767943/282179/781184/523515/282178/530577/281696/515646/538496/507899/282573/505563	27
CC	GO:0030425	dendrite	30/1224	68/4725	0.000794411	0.000794411	0.0300204	511034/517077/407209/281783/327682/527263/281958/535311/767615/541217/535990/533250/281881/281662/281198/281792/515119/282002/522967/282173/531673/768225/281296/520956/540541/617293/506612/280678/507389/505563	30
CC	GO:0097447	dendritic tree	30/1224	68/4725	0.000794411	0.000794411	0.0300204	511034/517077/407209/281783/327682/527263/281958/535311/767615/541217/535990/533250/281881/281662/281198/281792/515119/282002/522967/282173/531673/768225/281296/520956/540541/617293/506612/280678/507389/505563	30
CC	GO:0030054	cell junction	91/1224	265/4725	0.00104951	0.00104951	0.036055	511034/281777/282184/414922/508268/517077/286798/282644/530941/100141021/338070/280765/524973/539935/281478/281511/509790/327708/617924/767820/282239/282651/533223/788252/617345/327685/281783/540657/538745/511691/505702/280939/513828/281781/514066/540554/613644/535311/524770/767615/281950/506545/508454/407154/281509/540853/512659/541217/281876/515498/280712/281881/541597/100139484/281198/338036/5…	91
CC	GO:0098797	plasma membrane protein complex	38/1224	94/4725	0.00133068	0.00133068	0.0419047	282644/338068/526088/281598/282452/539935/281123/538745/281078/510026/281203/529761/513316/508454/407154/512659/281884/535990/281637/281881/281346/541597/281201/281198/281674/282179/781184/507339/526766/282178/530577/615310/281439/538496/281874/282573/505563/515216	38
MF	GO:0022836	gated channel activity	30/1048	57/3851	3.72908e-05	3.72908e-05	0.00684974	526133/526088/338070/281067/282348/282239/281700/281783/540657/282119/281958/513316/540853/281884/535990/540925/281881/541597/281198/338036/282179/781184/282178/282181/282177/317697/281696/515646/282573/505563	30
MF	GO:0022839	ion gated channel activity	30/1048	57/3851	3.72908e-05	3.72908e-05	0.00684974	526133/526088/338070/281067/282348/282239/281700/281783/540657/282119/281958/513316/540853/281884/535990/540925/281881/541597/281198/338036/282179/781184/282178/282181/282177/317697/281696/515646/282573/505563	30
MF	GO:0016301	kinase activity	50/1048	121/3851	0.000455471	0.000455471	0.0374398	505369/508683/281802/338068/281598/511961/280716/613448/515723/788066/509080/615512/280939/282246/781227/282041/508132/280715/514886/504437/534611/287019/536925/282136/282309/505792/327672/286822/282002/282001/522810/282173/507204/286883/404181/282170/615447/526376/518488/281848/509246/618880/615215/282325/282004/281801/281854/512373/533729/282682	50
MF	GO:0046873	metal ion transmembrane transporter activity	29/1048	61/3851	0.00050126	0.00050126	0.0374398	526133/327663/280705/517077/526088/317654/282368/282348/282360/513324/327685/515437/281958/513316/337925/540853/281884/535990/540925/281881/541597/338036/282363/615681/781184/317697/615007/282573/505563	29
MF	GO:0005216	ion channel activity	32/1048	70/3851	0.000624323	0.000624323	0.0374398	526133/526088/338070/281067/282348/282239/281700/327685/281783/540657/282119/281958/407172/513316/326577/540853/281884/535990/540925/281881/541597/281198/338036/282179/781184/282178/282181/282177/317697/281696/282573/505563	32
MF	GO:0016772	transferase activity, transferring phosphorus-containing groups	62/1048	159/3851	0.000649146	0.000649146	0.0374398	505369/508683/281802/338068/281598/511961/280716/613448/505641/534063/515723/788066/509080/615512/280939/282246/781227/282041/613730/508132/280715/514886/614834/504437/539728/534611/287019/536925/282136/282309/505792/327672/286822/282002/282001/522810/282173/507204/286883/404181/282170/615447/538710/535126/526376/518488/281848/522909/509246/618880/514330/615215/282325/507533/282004/281801/511080/…	62
MF	GO:0004197	cysteine-type endopeptidase activity	12/1048	19/3851	0.00108273	0.00108273	0.0374398	100141289/538284/538409/281663/505839/525655/281662/510164/281281/510524/408016/282068	12
MF	GO:0005543	phospholipid binding	33/1048	75/3851	0.00117931	0.00117931	0.0374398	281573/532555/528055/281478/517259/617924/614112/327685/327662/533622/512029/539350/508157/517231/511223/287026/514547/404155/281637/281881/525072/505009/317656/534567/281935/317697/520488/613986/618684/518366/523124/530879/614406	33
MF	GO:0022838	substrate-specific channel activity	33/1048	75/3851	0.00117931	0.00117931	0.0374398	526133/526088/338070/281067/282348/282239/281700/327685/281783/540657/282119/281958/407172/513316/326577/540853/281884/535990/540925/281881/541597/281198/338036/282179/781184/282178/282181/282177/317697/281696/493988/282573/505563	33
MF	GO:0005509	calcium ion binding	68/1048	181/3851	0.00119544	0.00119544	0.0374398	534482/281038/616560/327663/768324/281428/504948/281573/540771/616818/528055/534182/281478/524622/281511/282651/513324/327685/282662/508555/281276/532684/327662/535077/613991/785916/281663/281154/524770/541281/281905/539277/513316/508157/337925/513870/407154/287026/281985/505080/514695/281940/532663/534816/280685/281662/525072/281486/514259/529375/522269/282173/534427/535185/280985/281070/617677/…	68
MF	GO:0005244	voltage-gated ion channel activity	16/1048	29/3851	0.0013049	0.0013049	0.0374398	526133/526088/282119/281958/513316/540853/281884/535990/540925/281881/541597/781184/281696/515646/282573/505563	16
MF	GO:0022832	voltage-gated channel activity	16/1048	29/3851	0.0013049	0.0013049	0.0374398	526133/526088/282119/281958/513316/540853/281884/535990/540925/281881/541597/781184/281696/515646/282573/505563	16
MF	GO:0022843	voltage-gated cation channel activity	11/1048	17/3851	0.00132487	0.00132487	0.0374398	526133/526088/281958/540853/281884/535990/281881/541597/781184/282573/505563	11
MF	GO:0038023	signaling receptor activity	57/1048	149/3851	0.00180719	0.00180719	0.0465203	282564/281038/100139476/527140/282644/338068/281598/338070/317756/282452/281135/533656/507598/282239/788252/281783/540657/327684/281136/281536/407238/281958/281849/281146/281553/526585/281172/540287/538123/281876/286849/281549/505423/281126/280685/528174/281749/281198/282346/281943/281674/282179/768225/281848/508717/282178/510524/282181/282177/515911/281993/282602/507783/504741/281299/281874/2807…	57
MF	GO:0016740	transferase activity	152/1048	460/3851	0.00189947	0.00189947	0.0465203	505369/539035/508683/517211/281134/281802/508051/614471/534349/338068/281598/511961/280716/510682/613448/508918/506551/616005/532204/505641/534063/768224/515723/790815/617083/788066/539313/281092/540194/280946/515361/504633/531382/515186/281225/519857/514580/513167/509080/281119/615512/407768/528315/784720/280939/281781/614165/515386/282246/527885/781227/505472/767615/515594/327686/282276/785768/…	152

## Sheet: CC vs. SC Pathways (DMGs)
The significant pathways among clinical and subclinical group
ID	Description	GeneRatio	BgRatio	pvalue	p.adjust	qvalue	geneID	Count
bta04724	Glutamatergic synapse	53/1768	113/8735	1.37e-10	1.37e-10	2.62e-08	533760/505740/514554/282100/526088/532553/523673/538360/281790/511812/281601/281878/537804/509936/618399/529618/282648/536654/100295209/533527/615226/540485/535311/788151/531209/281203/522866/287026/281985/281793/535017/526363/525072/281201/614283/282136/327672/281792/281603/537698/282002/282001/100137840/510811/535362/408013/317697/326576/526435/525482/282325/100125276/282682	53
bta04728	Dopaminergic synapse	55/1768	134/8735	2.48e-08	2.48e-08	2.1e-06	790875/505740/537043/529590/526088/538771/785086/281790/534129/511812/281878/537804/532713/537631/618399/529618/282648/509290/530719/513010/282320/536654/617708/533527/338445/281293/281203/539277/282410/287026/281985/281793/281637/530705/513105/281126/100137872/281201/614283/618278/281792/520277/282002/282001/505757/408013/317697/513928/100124520/282325/531593/282471/524361/282162/100125276	55
bta04510	Focal adhesion	73/1768	198/8735	3.28e-08	3.28e-08	2.1e-06	513673/282564/790875/338037/511422/317711/282644/280794/282882/286865/281450/282188/520030/768226/538606/280958/615414/616294/327708/506953/327671/282301/537631/617345/527165/783470/540664/527263/529670/524770/541281/533199/280894/520454/282041/282191/503620/281876/505964/506270/615430/100137872/526409/281662/517433/532572/327672/539742/540310/527550/522269/282002/282001/512841/505709/282642/5069…	73
bta04360	Axon guidance	67/1768	179/8735	6.14e-08	6.14e-08	2.64e-06	534731/536815/513673/537951/790875/282100/535137/286865/540756/537777/512660/281790/525767/407104/525946/518168/539452/537455/327671/508008/534164/532713/613794/530719/616742/516019/527349/445419/785942/533527/533746/527263/538797/407103/518458/100126171/282041/540876/523720/282102/539369/281876/540595/505964/539687/506270/519843/407770/286877/286866/327672/539742/282001/522767/615883/282307/5073…	67
bta04015	Rap1 signaling pathway	77/1768	216/8735	7.3e-08	7.3e-08	2.64e-06	505740/528478/537312/532839/532952/532829/286865/281094/281790/281601/538477/537804/509936/327708/327671/507598/282301/510434/617345/616742/532605/527165/536654/783470/281136/280939/788151/526585/533199/539277/280894/520454/538447/513723/503620/613731/287026/281985/281876/281793/539687/535017/282140/515187/281126/100137872/539767/286877/100139484/327672/281792/520277/527550/281603/282637/282002/2…	77
bta04611	Platelet activation	50/1768	121/8735	8.27e-08	8.27e-08	2.64e-06	505740/338037/528478/286865/282188/281790/509326/281601/538606/281878/280958/509936/327708/515515/536654/783470/527263/788151/531209/526585/533125/522866/522423/282041/282022/287026/281985/281876/281793/535017/534996/534816/280685/100137872/525072/286877/282433/327672/540310/281603/515621/282642/282307/513244/317697/338049/614055/525482/282004/525159	50
bta04730	Long-term depression	30/1768	60/8735	2.42e-07	2.42e-07	6.63e-06	281790/281878/510434/529618/282648/282320/536654/540485/531209/533199/522866/287026/281985/281793/534996/525072/614283/282433/327672/281792/100139857/282002/282001/281716/281848/317697/282325/515159/282004/524361	30
bta04925	Aldosterone synthesis and secretion	41/1768	96/8735	4.18e-07	4.18e-07	1e-05	505740/537960/785086/534129/281601/282641/281878/509936/532713/530719/281276/513010/536654/510026/788151/539277/507041/538447/287026/281985/281793/539586/535017/281971/513105/282146/511504/282346/520277/281603/282002/282001/408013/613800/317697/513928/281299/525482/282325/538021/282162	41
bta04971	Gastric acid secretion	34/1768	74/8735	5.14e-07	5.14e-07	1.09e-05	505740/338037/317654/537960/533343/281790/281067/404084/281601/281878/509936/532713/530719/536654/281574/510026/788151/539277/287026/281985/281793/535017/617196/520277/281603/521163/282002/282001/613890/317697/525482/282325/282162/784876	34
bta04928	Parathyroid hormone synthesis, secretion and action	43/1768	104/8735	6.48e-07	6.48e-07	1.24e-05	281038/505740/514554/100124505/100336730/785086/281790/534129/281601/281878/509936/533656/513312/512254/513010/282483/536654/788151/533199/513836/287026/281985/505169/281793/540080/282886/535017/281637/513105/327672/281603/282002/282001/505242/317697/338049/507783/513928/317779/281020/525482/282325/515159	43
bta04725	Cholinergic synapse	45/1768	114/8735	1.68e-06	1.68e-06	2.93e-05	505740/526088/286865/785086/281790/534129/511812/281601/281878/509936/532713/618399/282648/530719/513010/536654/527263/788151/281203/533199/282410/287026/281985/281884/535017/513105/100137872/281201/327672/281792/281603/282002/515621/282001/282307/282178/282181/408013/317697/281020/525482/282325/282162/100125276/784876	45
bta04022	cGMP-PKG signaling pathway	60/1768	169/8735	2.34e-06	2.34e-06	3.73e-05	505740/338037/534568/781956/537960/100336730/785086/281790/534129/281601/538606/282641/281878/509936/281700/510434/512254/513010/282119/407140/536654/327716/533527/510026/540307/788151/533199/539277/507041/337925/282041/287026/281985/505964/535017/281971/513105/100137872/282146/281749/282433/327672/520277/281603/515621/512313/408013/613800/317697/338049/533039/513928/511224/525482/534669/507792/5…	60
bta04072	Phospholipase D signaling pathway	55/1768	152/8735	3.15e-06	3.15e-06	4.65e-05	505740/514554/506607/537312/532829/617707/286865/513389/537171/538360/528204/281601/538477/509936/507598/282301/510434/511691/504545/527165/541008/515515/281136/527263/540485/788151/531209/526585/533199/522866/513723/287026/281985/281793/535017/519269/511887/280685/100137872/506315/525072/540085/327672/281603/515621/282001/535298/282307/617172/535362/338049/282137/525482/515159/505908	55
bta05017	Spinocerebellar ataxia	39/1768	96/8735	3.58e-06	3.58e-06	4.9e-05	524142/507414/535450/539739/286865/281450/281878/537804/767990/513049/767928/537631/529618/282648/536654/100295209/537380/540485/535597/615488/287026/281985/540059/539858/517263/507340/100137872/614283/286866/100139857/282002/282001/512313/282307/317697/515757/282325/768316/505619	39
bta04666	Fc gamma R-mediated phagocytosis	38/1768	93/8735	4.04e-06	4.04e-06	5.16e-05	514554/504482/614576/523797/617707/286865/507329/614722/281478/327671/617345/511691/504545/515515/535077/531209/533199/522866/507041/280814/327705/534996/100137872/407152/525072/327672/282002/282001/404181/512841/282307/617172/281935/505708/282325/535225/508402/533729	38
bta04010	MAPK signaling pathway	91/1768	292/8735	4.79e-06	4.79e-06	5.73e-05	513673/505369/539334/533491/519251/282161/533908/281094/525647/282608/536337/327708/327671/519958/616115/282301/537631/510434/282648/512254/616742/527165/280939/533527/537380/540203/526227/281855/100295732/531209/504408/533199/533125/522866/540616/280894/281995/282410/515640/503620/613731/514886/535622/282140/533815/281637/519269/524806/100137872/353113/525072/541175/100139484/327672/510245/52937…	91
bta04961	Endocrine and other factor-regulated calcium reabsorption	24/1768	50/8735	9.57e-06	9.57e-06	0.000107807	537960/282641/509936/533656/511691/536654/281078/407238/510026/540307/337925/287026/281985/281793/506315/282146/784636/282002/282001/613800/507783/525482/282325/515216	24
bta04921	Oxytocin signaling pathway	53/1768	152/8735	1.62e-05	1.62e-05	0.000172184	505740/338037/526088/282161/511961/282608/281790/281601/538606/281878/509936/532713/327677/510434/530719/512254/536654/533527/100295732/788151/531209/533199/539277/522866/282041/287026/281985/281793/505964/535017/525072/511504/282433/509084/327672/281792/520277/281603/100139857/282002/515621/282001/781184/519644/408013/317697/338049/511224/538496/521730/525482/282325/282162	53
bta04726	Serotonergic synapse	43/1768	116/8735	1.85e-05	1.85e-05	0.000185832	280722/505740/282100/526088/540416/281790/511812/281878/282211/282239/618399/282648/540657/536654/617708/338445/281293/404177/531209/281203/533199/522866/282410/282022/407230/287026/281985/281793/525072/281201/327672/281792/282002/282001/282365/408013/317697/282325/616593/282471/408016/100125276/404074	43
bta04071	Sphingolipid signaling pathway	44/1768	120/8735	2.04e-05	2.04e-05	0.000185832	514554/616901/781956/286865/281135/281790/327671/520954/616115/537631/510434/509290/517533/518021/282320/536654/614165/527263/537380/537972/533199/507041/282041/287026/281985/505097/100137872/286877/327672/282002/282001/282307/614354/505757/338049/281020/281588/282325/515159/533538/510620/524361/522515/508233	44
bta04721	Synaptic vesicle cycle	32/1768	78/8735	2.08e-05	2.08e-05	0.000185832	282147/523673/282368/518974/505224/281511/768228/282648/282029/511691/539786/530692/617708/281078/282410/282378/540853/511839/282657/513275/506315/338038/282363/282148/784636/282365/616071/407118/616684/282377/282471/515216	32
bta04911	Insulin secretion	34/1768	85/8735	2.2e-05	2.2e-05	0.000185832	505740/534568/537312/537960/785086/534129/281601/509936/532713/530719/282029/513010/536654/510026/404177/788151/287026/281985/540853/281793/535017/513105/538996/281603/282002/282001/408013/617510/513928/525482/282325/524144/282162/282573	34
bta05231	Choline metabolism in cancer	38/1768	99/8735	2.26e-05	2.26e-05	0.000185832	514554/100125779/504482/530146/507455/617707/286865/513389/537171/528204/327671/282301/537631/510434/617624/541266/508155/504545/527165/519461/531209/533199/522866/513723/511887/100137872/525072/327672/282002/282001/404181/535298/282307/617172/520625/282325/505908/509613	38
bta04261	Adrenergic signaling in cardiomyocytes	52/1768	150/8735	2.33e-05	2.33e-05	0.000185832	505740/537312/282161/317654/537960/497019/785086/282608/281790/534129/281601/282641/509936/532713/509290/530719/513010/282320/407140/536654/510026/540307/788151/504408/539277/337925/287026/281985/540605/281793/535017/513105/100137872/282146/327672/520277/281603/515621/282001/512313/781184/505757/519644/408013/613800/513928/281020/538496/525482/524361/282162/784876	52
bta04270	Vascular smooth muscle contraction	47/1768	133/8735	3.26e-05	3.26e-05	0.000249625	505740/338037/534568/527140/617017/281601/538606/281878/509936/527214/510434/407140/536654/788151/531209/518542/533199/539277/522866/507041/282041/287026/281985/281793/505964/535017/407218/514876/525072/281749/282433/327672/520277/281603/282002/282001/408013/317697/338049/505708/525482/282325/515159/282004/515610/524144/282573	47
bta04211	Longevity regulating pathway	35/1768	90/8735	3.41e-05	3.41e-05	0.000251157	505740/519920/511961/286865/785086/534129/528204/281601/513049/509936/616115/338446/513010/535530/281496/788151/535017/539858/513105/507340/100137872/407235/509084/281603/507056/404181/282307/281848/281993/513928/514062/525482/509613/613629/508233	35
bta04972	Pancreatic secretion	38/1768	102/8735	4.91e-05	4.91e-05	0.000348249	505740/282100/317654/537960/281067/404084/281601/282641/281878/509936/327708/282360/327677/527214/286845/536654/510026/788151/508222/287026/281985/281793/535017/282687/282146/281603/282002/282001/512313/613800/317697/338049/617510/525482/282325/515764/282573/784876	38
bta05032	Morphine addiction	35/1768	92/8735	5.84e-05	5.84e-05	0.000399481	505740/524446/526088/100124505/281790/511812/281601/509936/282239/615885/618399/282648/540657/539194/522509/281958/788151/281203/282410/281793/535017/281637/281971/281201/282136/281792/281603/282002/282001/523515/525482/282325/281801/100125276/282682	35
bta04750	Inflammatory mediator regulation of TRP channels	38/1768	103/8735	6.28e-05	6.28e-05	0.000415067	505740/539334/286865/281601/281878/509936/532713/537631/530719/536654/788151/531209/518542/282329/539277/522866/507041/515640/407230/287026/281985/281793/535017/525072/540259/520277/281603/282002/617930/282001/286883/282307/317697/505708/525482/282325/616593/282162	38
bta04713	Circadian entrainment	37/1768	100/8735	7.28e-05	7.28e-05	0.000464622	505740/526088/281790/511812/281601/537804/509936/532713/618399/529618/530719/536654/788151/281203/504408/539277/287026/281985/281793/535017/281201/614283/282433/327672/281792/520277/281603/100139857/282002/282001/408013/317697/525482/282325/282004/282162/100125276	37
bta04926	Relaxin signaling pathway	45/1768	130/8735	8.41e-05	8.41e-05	0.000519964	505740/317711/286865/785086/282188/281790/534129/511812/281601/509936/616115/537631/618399/510434/513010/532029/788151/281203/533199/282191/507053/287026/281985/281793/535017/281637/513105/100137872/286877/281201/327672/281792/281603/282001/282876/535298/282307/535376/513928/281572/525482/515610/282122/100125276/508233	45
bta04540	Gap junction	34/1768	90/8735	8.73e-05	8.73e-05	0.000522683	505740/777775/281790/281601/281878/509936/282301/510434/527165/536654/281136/540485/100295732/788151/533199/407230/287026/281985/281793/535017/281126/282433/327672/281603/282002/282001/523542/535298/317697/281555/525482/282325/505908/282004	34
bta05215	Prostate cancer	36/1768	98/8735	0.000107585	0.000107585	0.000624579	790875/535231/541166/511037/286865/785086/534129/535399/616115/282301/510434/513010/527165/281855/533199/534040/515700/527024/534712/513105/100137872/327672/505709/535298/282307/281848/281832/767874/541184/281020/505453/505908/540481/404193/281854/508233	36
bta04144	Endocytosis	74/1768	245/8735	0.000113458	0.000113458	0.000639299	525906/506187/514554/528478/281802/538505/538771/338052/614576/511199/523797/514465/614722/281577/511918/532778/613720/282301/506374/536671/511691/281276/509769/512450/281078/281849/510489/512029/404069/515125/532672/504750/511223/534027/508431/281861/617385/616164/539295/539687/327705/281022/281637/506315/286877/515444/282136/535566/614521/615866/538348/784636/534750/511582/100138545/281848/5326…	74
bta04670	Leukocyte transendothelial migration	40/1768	113/8735	0.000117861	0.000117861	0.000645132	282184/414922/508268/537312/282882/286865/281258/281790/327708/327671/768307/504782/617345/522311/541008/281574/509230/524770/527492/282041/506545/281876/505964/506270/515187/539767/281346/540310/527550/522269/282002/282001/282303/282307/512405/338049/614055/282325/281874/780777	40
bta04014	Ras signaling pathway	73/1768	242/8735	0.000131639	0.000131639	0.000700537	513673/514554/533491/281148/286865/281094/511812/538477/537804/327708/327671/616115/282301/537631/527214/618399/510434/616742/527165/280939/281855/531209/281203/533199/539277/533125/522866/280894/540876/504509/513723/503620/613731/282532/514886/282140/519269/100137872/539767/511845/522344/525072/281201/540085/617325/327672/539742/520277/529375/282002/282001/535298/282307/533929/281848/520039/3380…	73
bta05030	Cocaine addiction	21/1768	48/8735	0.00018373	0.00018373	0.000928592	505740/785086/281790/534129/537804/616115/513010/617708/100295209/338445/281293/281793/513105/281126/614283/282173/281453/100137840/513928/282471/508233	21
bta04912	GnRH signaling pathway	34/1768	93/8735	0.000184188	0.000184188	0.000928592	505740/514554/281601/281878/509936/532713/537631/510434/530719/541008/536654/788151/531209/533199/539277/522866/287026/281985/281793/535017/525072/327672/520277/281603/282001/286883/535298/523962/408013/317697/505708/525482/282325/282162	34
bta00514	Other types of O-glycan biosynthesis	20/1768	45/8735	0.000200699	0.000200699	0.000985891	533703/618078/532545/535458/444859/100125390/617031/505267/617596/513167/508488/281781/493992/360194/614203/789150/504951/508782/505622/616218	20
bta04720	Long-term potentiation	27/1768	69/8735	0.000231977	0.000231977	0.00111105	533908/281601/281878/537804/327708/532713/510434/529618/530719/536654/533527/540485/526227/533199/539277/287026/281985/535017/614283/327672/520277/282002/282001/317697/505453/282325/282162	27
bta04916	Melanogenesis	36/1768	102/8735	0.000270853	0.000270853	0.00123734	790875/505740/445420/785086/281790/281601/509936/508008/532713/535399/510434/530719/513010/445419/536654/788151/533199/539277/280761/287026/281985/281793/535017/513105/523325/327672/281792/520277/281603/282002/282001/505453/525482/282325/540481/282162	36
bta04727	GABAergic synapse	33/1768	91/8735	0.000271262	0.000271262	0.00123734	505740/537873/517552/523970/281790/511812/281601/509936/282239/615885/618399/282648/540657/539194/788151/281203/282410/512459/535017/281201/281792/281603/282002/282001/523515/408013/616071/326576/407118/525482/280969/282325/100125276	33
bta04935	Growth hormone synthesis, secretion and action	40/1768	118/8735	0.00033635	0.00033635	0.00149855	790875/505740/286865/785086/281790/534129/281601/281878/509936/537631/510434/513010/536654/788151/533199/287026/281985/281793/506270/535017/513105/100137872/327672/527550/281603/282002/282001/282376/286883/512841/282375/535298/282307/523962/408013/317697/513928/505453/525482/282325	40
bta04918	Thyroid hormone synthesis	28/1768	74/8735	0.000346345	0.000346345	0.00150801	505740/537960/531369/785086/534129/281601/281878/509936/513010/536654/534110/510026/788151/281553/287026/281985/281793/280706/535017/513105/281603/282002/282001/531519/317697/513928/525482/282325	28
bta04024	cAMP signaling pathway	68/1768	229/8735	0.000364031	0.000364031	0.00154979	505740/514554/537312/317654/100124505/286865/537960/785086/281790/281067/534129/790124/281601/538606/282641/537804/509936/327708/327671/281992/532713/616115/537631/281700/510434/529618/617345/530719/513010/100295209/407172/510026/788151/281553/526585/282329/533199/539277/281172/282041/281701/281793/505964/535017/519269/513105/281126/100137872/282146/614283/281749/540830/327672/520277/281603/51231…	68
bta04915	Estrogen signaling pathway	45/1768	138/8735	0.000396394	0.000396394	0.00165088	505740/526088/286865/785086/281790/534129/281601/281878/509936/510434/513010/536654/540485/407238/281958/788151/281146/533199/539277/287026/281985/281793/535017/100848466/513105/100137872/327672/281792/520277/281603/534280/281888/510914/788182/507464/535298/282307/281832/317697/505708/513928/535704/767874/281020/525482	45
bta04152	AMPK signaling pathway	41/1768	123/8735	0.000424685	0.000424685	0.00173108	508683/511961/286865/785086/281067/534129/528204/281052/617419/338446/282704/509290/513010/282320/513483/514066/535530/407159/509200/513105/100137872/287019/407235/509084/515338/281590/507056/404181/538710/515024/282307/281848/505757/281993/534928/521730/280924/524361/509613/613629/506812	41
bta05221	Acute myeloid leukemia	26/1768	68/8735	0.000460985	0.000460985	0.0018399	529631/286865/535399/616115/510434/281855/533199/538628/534401/507100/100137872/327672/282376/404181/534280/445543/282375/535298/282307/100138545/353106/281402/540481/509613/281854/508233	26
bta05132	Salmonella infection	66/1768	224/8735	0.000557844	0.000557844	0.00218104	531741/507215/100141021/507481/537690/613724/528654/781426/538477/281577/404108/519958/535399/616115/768307/537631/510434/518833/509080/511691/281536/535127/540203/506218/281855/511776/540619/533199/282041/540719/540815/513342/505964/100137872/407152/538050/783375/515552/510197/327672/519789/787862/317655/281338/286883/508999/537748/281832/613533/338049/510330/282602/513431/767874/504727/281020/6…	66
bta05412	Arrhythmogenic right ventricular cardiomyopathy (ARVC)	28/1768	76/8735	0.000573977	0.000573977	0.00219924	282564/282644/282161/282882/280765/404144/282608/506953/535399/517059/540307/527492/337925/281876/512313/445543/282642/506995/781184/519644/408013/532127/281439/281062/281128/538496/540481/780777	28
bta05163	Human cytomegalovirus infection	71/1768	245/8735	0.000591385	0.000591385	0.00220852	790875/505740/507481/286865/785086/511754/281790/534129/528204/511812/281601/281878/509936/327671/616115/282301/618399/510434/513010/541008/536654/533527/281855/788151/281203/282329/533199/539277/282041/515640/534712/287026/281985/281793/506270/535017/513105/100137872/281201/327672/281792/520277/527550/281603/282002/282001/286883/404181/282170/512841/282642/535298/282307/281803/317697/338049/5139…	71
bta05031	Amphetamine addiction	26/1768	69/8735	0.000599455	0.000599455	0.00220852	505740/785086/534129/537804/532713/529618/530719/513010/617708/100295209/533527/338445/281293/539277/281793/513105/614283/520277/282002/282001/408013/513928/282325/282471/282162/613629	26
bta04012	ErbB signaling pathway	30/1768	84/8735	0.000679589	0.000679589	0.00245651	525906/513673/790875/286865/532713/537631/510434/530719/533199/540876/506270/100137872/511845/540085/327672/539742/282002/282001/282376/404181/512841/505709/282375/535298/282307/282325/509613/539977/282162/533729	30
bta04922	Glucagon signaling pathway	35/1768	103/8735	0.000733487	0.000733487	0.00260223	508683/511961/785086/534129/281878/281992/532713/338446/530719/513010/536654/533527/513483/514066/505472/539277/512571/287026/281985/281793/539570/513105/100137872/515338/520277/520388/281590/538710/317697/505453/404148/282162/613629/281274/506812	35
bta04020	Calcium signaling pathway	60/1768	202/8735	0.000780992	0.000780992	0.00272039	338037/540771/528555/281601/282641/281878/532713/282301/327677/282648/530719/532029/282119/527165/407140/281789/541008/536654/533527/540485/540307/788151/526585/539277/337925/282410/407230/287026/281985/528416/281793/535017/286771/281549/534816/353113/282146/511504/281749/286814/338036/520277/281603/100139857/282002/282001/282876/512313/505709/282178/408013/613800/317697/100124520/525482/282325/5…	60
bta04929	GnRH secretion	24/1768	65/8735	0.00133628	0.00133628	0.00457148	282100/526088/286865/539578/281878/510434/536654/407103/404177/281146/533199/282102/287026/281985/281637/100137872/327672/282002/282001/538255/282307/408013/317697/282325	24
bta04810	Regulation of actin cytoskeleton	61/1768	211/8735	0.00148637	0.00148637	0.00499573	513673/282564/338037/504482/282644/537711/280794/317654/100141021/282882/286865/281478/281577/538606/506953/327671/507598/282301/510434/617345/518833/527165/512950/281136/535077/281574/533823/524770/533233/526585/533199/282041/525628/613731/533289/281876/505964/506270/519269/280685/327672/539742/540310/527550/522269/512841/282642/506995/282307/533929/532127/338049/614055/281874/514056/535225/5084…	61
bta04371	Apelin signaling pathway	43/1768	140/8735	0.00203478	0.00203478	0.00661602	505740/338037/507414/317654/511961/100336730/281790/511812/281601/281878/509936/338446/618399/510434/512254/536654/540307/788151/281203/533199/515125/539277/507041/337925/287026/281985/535017/519269/100137872/281201/327672/520277/281603/282637/100139857/515621/282876/404181/504242/317697/525482/515610/100125276	43
bta04970	Salivary secretion	31/1768	93/8735	0.00203752	0.00203752	0.00661602	505740/317654/537960/404084/281601/282641/281878/509936/327677/286845/407140/536654/510026/788151/539277/287026/281985/281793/535017/282146/282433/520277/281603/282002/282001/613800/317697/525482/282325/282004/282573	31
bta05146	Amoebiasis	37/1768	117/8735	0.00231376	0.00231376	0.00738779	317711/280794/527391/286865/282188/520030/281601/616115/532029/281789/536654/281536/529670/524770/518752/515700/515640/282191/287026/281985/281793/506270/532572/538050/281246/522269/282002/282001/282876/282307/526766/100124520/510205/282325/516099/408016/508233	37
bta04151	PI3K-Akt signaling pathway	98/1768	373/8735	0.00239375	0.00239375	0.0075179	282564/790875/511422/317711/282644/280794/519920/282882/532829/286865/281094/281450/785086/511754/282188/520030/534129/528204/511812/280958/615414/506953/507598/616115/282301/618399/510434/509290/616742/509080/513010/282320/527165/515515/281136/280939/540664/281536/529670/535530/281855/541281/281203/526585/533199/280894/282191/503620/613731/281861/281876/517909/280827/506270/282140/513105/1001378…	98
bta04066	HIF-1 signaling pathway	35/1768	110/8735	0.0026723	0.0026723	0.00825738	508683/280705/519920/286865/525647/526006/532713/616115/510434/530719/280939/281536/533199/503620/282140/100137872/327672/282002/282001/282876/404181/505709/282307/281848/535578/281572/281020/505453/282325/282141/509613/282162/280817/281274/508233	35
bta05135	Yersinia infection	40/1768	130/8735	0.00276053	0.00276053	0.00839458	790875/504482/280794/282882/508890/533908/286865/281577/327671/519958/616115/537631/510434/617345/509080/541008/281536/540203/526227/281855/533199/282041/504509/538486/281876/506270/100137872/281246/327672/527550/286883/512841/616969/282307/513244/338049/511224/535225/281854/508233	40
bta04660	T cell receptor signaling pathway	34/1768	107/8735	0.00312504	0.00312504	0.00917996	525906/513673/790875/281732/508890/286865/616115/537631/510434/617345/522311/533527/527263/281855/533199/533125/504509/281060/535622/100137872/407152/281246/327672/539742/508367/535298/282307/513244/338049/511224/515377/281854/533729/508233	34
bta04062	Chemokine signaling pathway	54/1768	188/8735	0.00313781	0.00313781	0.00917996	790875/505740/281802/286865/281790/509821/511812/281601/509936/327708/327671/616115/615986/618399/617345/522311/541008/535530/281855/788151/281203/533199/282041/287026/281985/280814/506270/535017/534996/281637/100137872/286877/281201/282136/327672/527550/281603/515621/282376/282170/512841/535298/282307/338049/505708/530951/525482/282325/281801/281854/100125276/533729/508233/282682	54
bta04927	Cortisol synthesis and secretion	23/1768	65/8735	0.00316255	0.00316255	0.00917996	505740/540688/785086/534129/281601/281878/509936/281276/513010/536654/788151/287026/281985/281793/535017/513105/282346/281603/408013/317697/513928/281299/525482	23
bta04934	Cushing syndrome	46/1768	156/8735	0.00354806	0.00354806	0.0101453	790875/505740/524446/540688/445420/785086/511754/281790/534129/281601/281878/509936/327708/508008/532713/535399/510434/530719/281276/513010/445419/536654/533233/788151/533199/534712/287026/281985/281793/535017/513105/523325/282346/327672/281603/281609/281716/408013/317697/513928/541184/281299/525482/504357/540481/282162	46
bta04310	Wnt signaling pathway	47/1768	161/8735	0.00400041	0.00400041	0.0112705	614346/790875/513056/445420/785152/615414/327671/508008/768234/532713/535399/541161/537631/530719/785924/445419/533527/534650/540179/515972/533233/513742/282041/287026/281985/536121/505423/523325/618428/510821/618586/282002/282001/507204/338049/511475/353106/511224/505453/282325/504357/540481/534072/281730/282069/282068/282162	47
bta04520	Adherens junction	24/1768	70/8735	0.00415718	0.00415718	0.0115424	504482/281577/327671/535399/536759/527263/524770/515125/527492/508658/515187/327672/282637/522269/507204/505709/281848/535376/338049/507632/505453/540481/504625/780777	24
bta00330	Arginine and proline metabolism	18/1768	48/8735	0.00425062	0.00425062	0.0116333	506961/100126042/537539/507327/338445/281293/615950/510525/518752/508629/286886/508542/286822/282876/513967/614200/281206/518288	18
bta00561	Glycerolipid metabolism	23/1768	67/8735	0.00487755	0.00487755	0.0129783	506607/617707/513389/537539/537171/514693/519739/504545/535192/537224/521637/511887/508629/513967/617172/505290/541284/282137/281283/529067/497202/515764/512373	23
bta05223	Non-small cell lung cancer	23/1768	67/8735	0.00487755	0.00487755	0.0129783	286865/511754/510434/535530/541218/533199/540187/534712/514886/519357/100137872/539767/327672/282002/282001/282376/505709/282375/535298/282307/692183/541184/282325	23
bta04931	Insulin resistance	34/1768	110/8735	0.00509678	0.00509678	0.0133758	790875/511961/533908/286865/785086/534129/281052/281992/616115/338446/537631/513010/537062/526227/505472/535727/507041/514460/534649/508658/513105/100137872/286877/783217/515338/404181/538710/282307/505708/282325/539466/281854/508233/506812	34
bta00270	Cysteine and methionine metabolism	18/1768	49/8735	0.00547208	0.00547208	0.0141667	514525/505103/505511/532836/280946/525563/281119/533044/615764/615950/359716/528582/516783/286886/512468/281206/280869/281274	18
bta04976	Bile secretion	27/1768	83/8735	0.00559138	0.00559138	0.0142826	505740/531150/317654/537960/281067/404084/281601/282472/509936/536203/282360/281276/519461/510026/404177/788151/407159/281793/535017/535293/282346/282361/281603/533151/407112/407224/525482	27
bta05165	Human papillomavirus infection	89/1768	345/8735	0.00634935	0.00634935	0.0159337	282564/282147/790875/528478/511422/317711/282644/280794/514561/282882/507481/536993/445420/286865/538609/281450/785086/511754/282188/520030/534129/528204/518974/505224/505267/280958/615414/506953/506402/508008/616115/767928/510434/509290/513010/789216/282320/527165/445419/540664/529670/281855/533233/541281/533199/512571/506238/282191/534712/281876/281793/540059/539687/511839/506270/282657/521194/…	89
bta05212	Pancreatic cancer	25/1768	76/8735	0.00640414	0.00640414	0.0159337	514554/286865/511754/538477/327671/616115/537631/533823/281855/541218/533199/515125/513723/534712/519357/100137872/327672/404181/505709/282307/535376/281572/541184/281854/508233	25
bta04218	Cellular senescence	47/1768	166/8735	0.00748206	0.00748206	0.018377	286865/512233/511754/528204/281878/615414/616115/510434/788127/282119/327716/533527/535530/616801/618104/533199/515125/539277/534712/510420/522943/519269/100137872/539767/281662/616597/540259/281420/518897/327672/520277/533294/282860/286883/282307/408013/535376/317697/520188/541184/511224/534072/509613/536656/613629/540313/508233	47
bta05214	Glioma	25/1768	77/8735	0.00770213	0.00770213	0.0186781	286865/511754/532713/282301/510434/530719/527165/541218/533199/539277/534712/519357/100137872/511504/327672/520277/282002/282001/535298/282307/281848/541184/282325/505908/282162	25
bta01200	Carbon metabolism	34/1768	113/8735	0.00802598	0.00802598	0.0192201	508683/281235/286840/505103/534599/280976/280682/526006/512995/533044/513483/514066/540985/781227/512571/511090/614302/535653/282873/516783/618400/286886/280808/327669/537713/507817/404148/281206/281748/280817/281785/512373/525813/338471	34
bta04722	Neurotrophin signaling pathway	36/1768	122/8735	0.00906975	0.00906975	0.0214515	790875/533908/286865/327708/532713/616115/537631/510434/530719/504668/535530/537380/526227/100295732/504408/533199/539277/520454/540876/100137872/540085/614726/327672/520277/512841/535298/282307/523962/539126/338049/505708/281020/506066/281854/282162/508233	36
bta04530	Tight junction	49/1768	177/8735	0.0100779	0.0100779	0.0235454	528478/511594/529631/508445/282184/414922/508268/511961/777775/536993/505940/281258/281067/404108/537631/509290/533531/282320/536863/407101/327716/537380/281574/535509/524770/507041/282041/538486/506545/281876/505964/539687/286877/100139484/533131/522269/317655/281338/505709/505242/523962/512405/408013/338049/515620/539292/614055/530050/524361	49
bta04390	Hippo signaling pathway	43/1768	152/8735	0.010359	0.010359	0.0236942	790875/528478/614786/510255/536993/445420/788948/615414/508008/768234/535399/515407/509290/282320/445419/535509/533233/530910/515125/407216/527492/540595/539687/533815/407175/520406/286877/523325/540488/282126/282637/100137840/523542/535376/617525/539292/504357/540481/534072/524361/535699/780777/404101	43
bta04142	Lysosome	36/1768	123/8735	0.010389	0.010389	0.0236942	531327/518974/512444/281909/533177/504310/281078/530164/281849/541272/536359/767602/538401/511839/282657/404155/505097/338038/529923/506192/515809/282148/513067/510539/281281/784163/510524/507188/536435/505554/504799/100125267/510620/509427/510967/509715	36
bta04933	AGE-RAGE signaling pathway in diabetic complications	31/1768	103/8735	0.0109758	0.0109758	0.0243138	317711/280794/540771/286865/282188/616115/537631/515125/507041/282191/287026/281985/100137872/286877/327672/282001/282376/282375/282307/535376/505708/281402/281572/511224/281020/282325/519037/282122/408016/378474/508233	31
bta04070	Phosphatidylinositol signaling system	30/1768	99/8735	0.0110414	0.0110414	0.0243138	281869/540771/286865/507329/513389/537171/281878/533622/539277/287026/281985/533289/614834/536810/511887/535099/282309/520277/282002/282001/782743/282307/518488/317697/530577/508236/521960/282325/519037/507860	30
bta05414	Dilated cardiomyopathy (DCM)	30/1768	99/8735	0.0110414	0.0110414	0.0243138	282564/505740/282644/282161/282882/280765/404144/497019/282608/281601/509936/506953/517059/540307/788151/337925/281876/281793/535017/281603/512313/282642/506995/781184/519644/408013/532127/281439/538496/525482	30
bta00564	Glycerophospholipid metabolism	31/1768	104/8735	0.0126851	0.0126851	0.0275103	514554/100125779/506607/504948/617707/513389/537171/515361/519739/527214/515186/504545/531209/522866/537224/614834/512761/521637/509819/511887/525072/541208/360197/524639/535126/617172/514456/541284/282137/529067/497202	31
bta04514	Cell adhesion molecules (CAMs)	44/1768	158/8735	0.0127802	0.0127802	0.0275103	530042/540003/407131/282184/414922/508268/618198/282882/281732/781106/539387/281258/531178/525767/281705/282662/533834/509230/614412/281950/281060/523720/506545/281876/286849/615785/281941/529873/407152/281486/281051/617434/281196/540576/522202/282637/539607/282303/512405/532127/281062/281874/783068/537808	44
bta04914	Progesterone-mediated oocyte maturation	27/1768	88/8735	0.012986	0.012986	0.0276427	505740/533908/286865/281790/281601/509936/537631/514572/526227/788151/533199/504437/535017/100848466/100137872/327672/281603/540660/526376/282307/281848/281832/520188/767874/525482/517837/537016	27
bta00620	Pyruvate metabolism	14/1768	38/8735	0.0131675	0.0131675	0.0277211	537539/540985/512571/767889/282873/508629/515338/281590/513967/507817/509274/525813/338471/281274	14
bta04710	Circadian rhythm	12/1768	31/8735	0.0138136	0.0138136	0.0287653	511961/535947/768234/528382/535597/614049/530705/509058/768225/523542/506945/534072	12
bta04140	Autophagy - animal	40/1768	142/8735	0.0140555	0.0140555	0.0289542	507414/531455/286865/509587/528204/513049/537631/510434/282320/540873/514919/533199/535820/534126/282691/539858/617606/517263/519269/614285/507340/100137872/538050/535099/519982/509084/327672/532261/508631/507056/782743/404181/282307/281848/787967/317697/505708/281020/524361/768316	40
bta00230	Purine metabolism	38/1768	134/8735	0.0146938	0.0146938	0.029947	505740/511200/524446/280716/613448/100124505/534402/524973/281601/509936/510949/506980/281973/528311/281363/522509/282246/781227/788151/512571/615606/280960/280715/280712/535017/281971/534611/282433/281603/616992/404189/615447/511269/692183/533000/525482/282223/783572	38
bta05100	Bacterial invasion of epithelial cells	23/1768	73/8735	0.0150905	0.0150905	0.0299796	531741/508445/504482/280794/286865/509821/281577/511691/281078/527492/281876/506270/506315/510704/540085/527550/282637/512841/282307/338049/615310/508402/780777	23
bta04512	ECM-receptor interaction	27/1768	89/8735	0.0151424	0.0151424	0.0299796	282564/511422/317711/282644/280794/282882/281450/282188/520030/281052/280958/506953/540664/529670/538430/541281/282191/281876/526409/517433/532572/282642/506995/527014/532127/281439/282654	27
bta05220	Chronic myeloid leukemia	24/1768	77/8735	0.0151792	0.0151792	0.0299796	529631/286865/511754/616115/510434/281855/541218/533199/515125/540876/534712/519357/100137872/327672/282376/512841/282375/535298/282307/535376/541184/281730/281854/508233	24
bta04668	TNF signaling pathway	34/1768	118/8735	0.0159242	0.0159242	0.0308157	507481/286865/281094/785086/534129/519958/616115/537631/513010/789216/521987/540944/537380/540203/281855/504408/533199/541268/508431/535622/513105/100137872/338033/327672/444867/286883/508367/282307/513928/504727/282122/408016/281854/508233	34
bta04919	Thyroid hormone signaling pathway	34/1768	118/8735	0.0159242	0.0159242	0.0308157	790875/538979/317654/540771/286865/537960/528204/510434/327716/541240/407238/510026/533199/407216/525389/534649/287026/281985/613879/100137872/287019/517336/327672/282002/282001/507663/512313/282642/282307/525636/536128/505453/282325/519037	34
bta01212	Fatty acid metabolism	19/1768	58/8735	0.0169838	0.0169838	0.0320707	100138312/353301/508918/617419/533333/614105/506059/100125237/789567/281590/515577/617293/615756/280924/281748/514159/504301/537161/506812	19
bta00061	Fatty acid biosynthesis	8/1768	18/8735	0.0173651	0.0173651	0.0320707	100138312/353301/506059/515338/281590/515577/514159/537161	8
bta01210	2-Oxocarboxylic acid metabolism	8/1768	18/8735	0.0173651	0.0173651	0.0320707	281235/280976/280682/512995/618400/286886/327669/281206	8
bta01522	Endocrine resistance	28/1768	94/8735	0.0174098	0.0174098	0.0320707	505740/531150/286865/281601/509936/537631/510434/407238/788151/281146/533199/534712/281793/506270/535017/100137872/327672/281603/507663/404181/505709/535298/282307/281848/536128/541184/281020/525482	28
bta05222	Small cell lung cancer	28/1768	94/8735	0.0174098	0.0174098	0.0320707	317711/280794/286865/615827/511754/520030/537782/616115/540944/529670/281855/541218/540616/282191/534712/281876/506270/519357/100137872/532572/282876/282307/692183/541184/281020/408016/281854/508233	28
bta04664	Fc epsilon RI signaling pathway	22/1768	70/8735	0.0177338	0.0177338	0.0323563	286865/507329/327671/537631/510434/617345/515515/527263/531209/533199/522866/613869/534996/100137872/525072/327672/282001/286883/535298/282307/513244/404074	22
bta05213	Endometrial cancer	19/1768	59/8735	0.0204278	0.0204278	0.0369202	790875/286865/535399/510434/535530/533233/541218/533199/527492/519357/100137872/327672/282637/505709/535298/282307/504357/540481/780777	19
bta04910	Insulin signaling pathway	38/1768	137/8735	0.0209023	0.0209023	0.0374247	525906/790875/528478/519920/511961/286865/525647/528204/338446/537631/510434/513483/514066/505472/533199/539277/520454/100139988/508658/100137872/286877/515338/327672/520277/281590/507056/404181/512841/538710/535298/282307/100139910/505370/504625/539466/509613/281854/280817	38
bta04146	Peroxisome	25/1768	84/8735	0.0239798	0.0239798	0.0425372	531027/512676/613679/281235/100138312/508918/505771/281092/506059/511716/281496/535727/281360/280960/505763/504360/525262/507393/505792/282876/509102/327669/514969/514159/537161	25
bta01521	EGFR tyrosine kinase inhibitor resistance	24/1768	80/8735	0.0242238	0.0242238	0.0425759	790875/519920/286865/282301/510434/527165/535530/533199/100137872/540085/327672/282002/282001/404181/505709/535298/282307/281848/281572/281020/282325/505908/404193/509613	24
bta00250	Alanine, aspartate and glutamate metabolism	13/1768	37/8735	0.025032	0.025032	0.0435964	517552/100126042/514209/510949/504261/512459/618400/286886/532724/280969/281206/281785/767970	13
bta04723	Retrograde endocannabinoid signaling	41/1768	152/8735	0.0265714	0.0265714	0.0458606	505740/526088/540007/338060/281790/541291/511812/281601/281878/509936/282239/615885/537631/618399/529618/282648/540657/539194/536654/540485/788151/281203/282410/287026/281985/535017/281201/614283/327672/281792/281603/282002/282001/523515/408013/505290/317697/525482/282325/538021/100125276	41
bta00020	Citrate cycle (TCA cycle)	11/1768	30/8735	0.0275932	0.0275932	0.0471989	281235/286840/534599/280976/280682/512995/511090/511135/327669/537713/338471	11
bta01230	Biosynthesis of amino acids	22/1768	73/8735	0.0286125	0.0286125	0.0485093	508683/514525/281235/505103/514209/280976/280682/510583/526006/512995/533044/781227/512571/518752/516783/618400/286886/327669/404148/281206/280869/338471	22
bta00515	Mannose type O-glycan biosynthesis	9/1768	23/8735	0.0292101	0.0292101	0.0489652	506551/444859/100125390/506466/281781/541595/282854/497030/618055	9
bta00051	Fructose and mannose metabolism	12/1768	34/8735	0.0296482	0.0296482	0.0489652	508683/513483/514066/508954/287019/513586/534928/617688/615106/510978/280817/512373	12
bta00410	beta-Alanine metabolism	12/1768	34/8735	0.0296482	0.0296482	0.0489652	517552/281124/537539/512459/509241/508629/504557/513967/614548/614200/280969/281748	12
bta04114	Oocyte meiosis	33/1768	119/8735	0.029916	0.029916	0.0489852	505740/533908/281601/506740/281878/509936/532713/514572/530719/282320/533527/526227/788151/533199/539277/504437/535017/100848466/282126/327672/520277/281603/540660/281848/505757/317697/525482/517837/515399/537016/534072/524361/282162	33

## Sheet: CC vs. HC GO Terms (DMGs)
The significant GO terms among clinical and healthy group
ONTOLOGY	ID	Description	GeneRatio	BgRatio	pvalue	p.adjust	qvalue	geneID	Count
CC	GO:0044459	plasma membrane part	165/1367	438/4725	2.13803e-05	2.13803e-05	0.00742684	282357/526133/511034/281614/281038/338037/281777/281875/508882/526088/281598/281753/281122/507026/281976/532712/505040/768006/513214/282452/504974/282709/282466/767922/282368/282356/281123/407209/281052/281601/528379/520189/281511/509790/281936/509969/282348/523784/100336102/282238/282360/534560/280834/281700/280832/615107/788252/281973/540657/509080/511691/281276/789618/327682/281605/516087/2823…	165
CC	GO:0045177	apical part of cell	39/1367	79/4725	8.91636e-05	8.91636e-05	0.0154863	282357/508882/286823/281122/532712/767922/282356/508836/281052/282348/100336102/281276/281605/282353/280939/281193/529405/281574/505797/616179/540426/535311/281625/511839/517111/281057/511097/282365/505242/518488/281696/520625/539635/281062/507667/617802/281407/282573/505563	39
CC	GO:0034703	cation channel complex	21/1367	36/4725	0.000209115	0.000209115	0.0173083	526133/526088/281123/282348/513316/785179/514460/327667/614795/281884/535990/538100/281880/281881/281883/530577/538730/788566/538496/282573/505563	21
CC	GO:0098590	plasma membrane region	102/1367	262/4725	0.000218562	0.000218562	0.0173083	282357/511034/338037/281777/508882/526088/281753/281122/281976/532712/768006/504974/282709/767922/282356/407209/281052/281601/528379/281511/509790/281936/509969/282348/100336102/282238/282360/280834/281700/788252/281973/540657/509080/281276/281605/282353/282134/280939/512981/281781/514327/535127/281193/529405/281574/519461/505797/537718/540426/535311/282689/281553/281125/526585/281625/337925/5087…	102
CC	GO:0070161	anchoring junction	29/1367	56/4725	0.000249134	0.000249134	0.0173083	280710/286798/281875/530941/521918/281873/526848/327685/282308/280939/281781/281193/540426/541164/613644/524770/512659/517111/281405/514902/281515/282365/532898/617525/532573/510159/281062/280979/511433	29
CC	GO:0005912	adherens junction	27/1367	52/4725	0.0003832	0.0003832	0.0219137	280710/286798/281875/530941/521918/281873/526848/327685/282308/280939/281193/540426/541164/613644/524770/512659/517111/514902/281515/282365/532898/617525/532573/510159/281062/280979/511433	27
CC	GO:0034705	potassium channel complex	12/1367	17/4725	0.000443108	0.000443108	0.0219137	526133/526088/281123/513316/281884/535990/281880/281881/281883/788566/282573/505563	12
CC	GO:0042995	cell projection	160/1367	446/4725	0.000504679	0.000504679	0.0219137	280722/511034/281614/281038/338037/281777/539679/527583/613455/613916/504482/508882/281573/536462/286823/100141021/505853/281122/281976/532712/768006/282323/534169/509823/407209/281512/509032/281052/281577/541099/528379/281885/281936/282348/286852/280834/281700/533223/788252/281973/100125881/511691/517994/540236/789618/327682/282684/528315/538474/515437/280939/512981/281781/535127/527263/281958/2…	160
CC	GO:0120025	plasma membrane bounded cell projection	151/1367	421/4725	0.000739851	0.000739851	0.027329	280722/511034/281614/281038/338037/281777/539679/527583/613455/613916/504482/508882/281573/536462/286823/100141021/505853/281122/281976/532712/768006/282323/534169/509823/407209/281512/509032/281052/281577/541099/528379/281885/281936/282348/286852/280834/281700/788252/281973/100125881/511691/517994/540236/327682/282684/528315/538474/515437/280939/512981/281781/535127/527263/281958/281574/508306/5…	151
CC	GO:0016324	apical plasma membrane	31/1367	65/4725	0.000978739	0.000978739	0.027329	282357/281122/767922/282356/281052/282348/100336102/281605/282353/280939/281193/529405/281574/505797/540426/281625/511839/517111/281057/511097/282365/505242/518488/281696/520625/539635/281062/507667/617802/282573/505563	31
CC	GO:0044463	cell projection part	99/1367	263/4725	0.00106625	0.00106625	0.027329	280722/511034/281614/281038/281777/539679/613916/508882/281573/536462/281122/281976/532712/768006/282323/534169/509823/407209/281052/282348/286852/280834/281700/788252/281973/100125881/511691/517994/540236/327682/282684/512981/281781/535127/527263/281958/281574/508306/540426/535311/536359/767602/282656/767615/281125/507311/509524/282022/508723/540853/541217/281884/535990/281057/768017/504523/5332…	99
CC	GO:0120038	plasma membrane bounded cell projection part	99/1367	263/4725	0.00106625	0.00106625	0.027329	280722/511034/281614/281038/281777/539679/613916/508882/281573/536462/281122/281976/532712/768006/282323/534169/509823/407209/281052/282348/286852/280834/281700/788252/281973/100125881/511691/517994/540236/327682/282684/512981/281781/535127/527263/281958/281574/508306/540426/535311/536359/767602/282656/767615/281125/507311/509524/282022/508723/540853/541217/281884/535990/281057/768017/504523/5332…	99
CC	GO:0044432	endoplasmic reticulum part	113/1367	306/4725	0.0010874	0.0010874	0.027329	511603/613886/510688/539035/280872/615627/506316/783831/615906/536181/317654/407225/767902/282299/508700/617707/506991/535344/525416/509326/528204/511899/514271/504832/525106/505855/509969/515361/100336102/617419/532713/614774/522186/520650/505233/513167/532775/281036/513010/767948/280750/286812/614165/616179/317706/527885/100125237/529761/617543/281125/281419/540868/514683/785179/282022/613869/6…	113
CC	GO:0008076	voltage-gated potassium channel complex	11/1367	16/4725	0.00110144	0.00110144	0.027329	526088/281123/513316/281884/535990/281880/281881/281883/788566/282573/505563	11
CC	GO:0042734	presynaptic membrane	10/1367	14/4725	0.00120121	0.00120121	0.0278176	526088/281511/788252/281125/508794/540853/281971/281881/281080/506612	10
CC	GO:0031252	cell leading edge	35/1367	78/4725	0.00184798	0.00184798	0.0381057	338037/504482/508882/281573/100141021/281122/532712/614212/407209/281577/281885/528315/515437/535127/281574/524770/512029/281595/353121/281987/533720/517111/281057/540207/514902/522967/281937/281296/507837/505242/281935/613997/520488/532573/539635	35
CC	GO:0034702	ion channel complex	28/1367	59/4725	0.00186487	0.00186487	0.0381057	526133/526088/286823/281123/282348/282238/540657/513316/785179/514460/327667/614795/281884/535990/538100/281880/281881/281198/282179/281883/282178/530577/281696/538730/788566/538496/282573/505563	28
CC	GO:0009986	cell surface	42/1367	98/4725	0.00205589	0.00205589	0.039675	280722/510688/286798/508882/281598/286823/281122/507026/280686/281873/280832/615107/281276/280677/516087/281136/280939/280843/281781/529405/281849/540426/613644/280733/282689/281625/535740/286849/281884/280685/282346/613357/444867/280846/532573/281062/507667/281874/282068/281407/282573/280745	42
CC	GO:0097458	neuron part	110/1367	303/4725	0.00247456	0.00247456	0.0452413	280722/511034/281614/281038/281777/539679/526088/534678/100141021/505853/281976/317659/767922/407174/509823/282368/407209/281512/281601/541099/528379/281511/533232/509969/286852/281700/788252/618546/414274/281973/511691/281276/540236/327682/538474/512981/527263/281958/508306/507648/537718/510998/535311/536359/767602/508410/282656/767615/281125/508794/535421/282022/508723/407230/540853/541217/2818…	110
CC	GO:1902495	transmembrane transporter complex	29/1367	63/4725	0.00277938	0.00277938	0.0482735	526133/526088/286823/281123/282348/282238/281700/540657/513316/785179/514460/327667/614795/281884/535990/538100/281880/281881/281198/282179/281883/282178/530577/281696/538730/788566/538496/282573/505563	29
MF	GO:0046873	metal ion transmembrane transporter activity	37/1148	61/3851	4.70968e-07	4.70968e-07	0.000177481	526133/327663/280705/526088/317654/407174/282368/282348/282360/327685/532775/282353/515437/281958/282689/282474/513316/337925/540853/281884/535990/538100/281880/281881/338036/282363/615681/327703/281883/317697/505064/281879/617802/518117/615007/282573/505563	37
MF	GO:0038024	cargo receptor activity	16/1148	22/3851	3.85014e-05	3.85014e-05	0.00507864	282009/338056/525399/327685/281276/516087/532684/529405/532663/509133/282346/531137/512517/281904/515216/280745	16
MF	GO:0005543	phospholipid binding	39/1148	75/3851	4.04305e-05	4.04305e-05	0.00507864	519597/281573/513214/280686/508836/517259/617924/281626/614112/327685/512029/282689/539350/514402/281625/508157/281948/511223/280787/287026/514547/404155/281637/281881/525072/506764/282139/534567/281883/281935/338050/317697/520488/613986/618684/518366/530879/281627/614406	39
MF	GO:0008324	cation transmembrane transporter activity	52/1148	111/3851	9.16768e-05	9.16768e-05	0.00863692	526133/327663/281640/280705/526088/317654/282709/407174/282368/282348/282360/281700/327685/532775/282353/515437/281958/511375/282689/282474/513316/337925/615757/540853/281884/282657/535990/407151/538100/281880/281881/338036/282363/615681/511097/282179/327703/281883/338075/282178/507686/317697/505064/281879/520625/617802/518117/511755/615007/282573/505563/281091	52
MF	GO:0022890	inorganic cation transmembrane transporter activity	47/1148	99/3851	0.000133104	0.000133104	0.0100319	526133/327663/281640/280705/526088/317654/407174/282368/282348/282360/281700/327685/532775/282353/515437/281958/282689/282474/513316/337925/615757/540853/281884/282657/535990/407151/538100/281880/281881/338036/282363/615681/511097/282179/327703/281883/338075/282178/317697/505064/281879/617802/518117/615007/282573/505563/281091	47
MF	GO:0005261	cation channel activity	27/1148	49/3851	0.000177871	0.000177871	0.0111716	526133/526088/282348/281700/327685/532775/281958/282689/513316/540853/281884/535990/407151/538100/281880/281881/338036/282179/327703/281883/282178/317697/505064/281879/617802/282573/505563	27
MF	GO:0005044	scavenger receptor activity	11/1148	15/3851	0.000617755	0.000617755	0.0332566	282009/338056/525399/516087/532684/529405/532663/531137/512517/281904/280745	11

## Sheet: CC vs. HC Pathways (DMGs)
The significant pathways among clinical and healthy group
ID	Description	GeneRatio	BgRatio	pvalue	p.adjust	qvalue	geneID	Count
bta04724	Glutamatergic synapse	56/1951	113/8735	1.52819e-10	1.52819e-10	2.89551e-08	533760/505740/525962/514554/526088/532553/286850/282323/523673/538360/541056/281790/281601/281878/537804/286852/618399/529618/282648/282353/536654/533527/615226/540485/534626/535311/281203/522866/282321/287026/281985/281793/535017/529904/526363/525072/281201/614283/282136/281792/537698/282001/100137840/535158/510811/535362/408013/317697/519904/326576/281879/526435/525482/282325/100125225/282682	56
bta05017	Spinocerebellar ataxia	45/1951	96/8735	8.27481e-08	8.27481e-08	6.40386e-06	524142/517948/507414/539739/506223/281450/281878/537804/767990/540741/767928/537631/529618/282648/282308/536654/282123/537380/540485/534626/535597/615488/287026/281985/404165/281385/540059/539858/517263/504531/614283/286866/526310/100139857/534923/282001/535158/282307/317697/281879/534815/282325/518117/768316/505619	45
bta04010	MAPK signaling pathway	104/1951	292/8735	1.01394e-07	1.01394e-07	6.40386e-06	513673/505369/539334/533491/540803/509827/519251/282161/533908/532712/286850/282323/281094/525647/536337/286800/281885/532393/519958/616115/286852/538751/537631/280832/407170/282648/512254/616742/317696/614453/281160/527165/280939/533527/537380/517953/529146/526227/281165/281855/786886/100295732/504408/533199/533125/522866/540616/281995/282410/515640/281250/282321/503620/514886/327667/535622/5058…	104
bta04728	Dopaminergic synapse	56/1951	134/8735	3.07858e-07	3.07858e-07	1.45828e-05	790875/505740/525962/537043/509827/526088/538771/286850/282323/785086/281790/534129/525416/281878/537804/532713/286852/537631/618399/529618/282648/509290/530719/513010/282320/536654/533527/508045/534626/338445/281203/533617/281125/539277/617095/282410/287026/281985/281793/529904/281637/530705/281201/614283/281792/534923/536561/282001/505757/408013/317697/281879/100124520/282325/282471/282162	56
bta04020	Calcium signaling pathway	76/1951	202/8735	4.73917e-07	4.73917e-07	1.79589e-05	338037/540771/282323/282330/528555/525416/281601/282641/281878/281970/532713/404136/286852/327677/506207/282648/317708/530719/281605/527165/281789/541008/536654/282134/533527/540485/515732/540307/281125/526585/539277/615813/617095/337925/282410/282321/407230/287026/281985/528416/281793/281987/535017/286771/534816/353113/511504/281749/541168/286814/338036/100139857/282001/282876/338035/514898/2824…	76
bta04713	Circadian entrainment	44/1951	100/8735	1.05187e-06	1.05187e-06	3.05256e-05	505740/525962/526088/286850/282323/512237/281790/525416/319095/281601/537804/532713/618399/529618/530719/536654/534626/281203/504408/539277/617095/287026/281985/281793/535017/613600/529904/281201/614283/281216/282433/281792/100139857/282001/282411/535158/408013/317697/281879/525482/282325/282004/282162/528665	44
bta04520	Adherens junction	34/1951	70/8735	1.12775e-06	1.12775e-06	3.05256e-05	504482/532712/507718/281577/505696/535399/536759/526848/782690/527263/529146/524770/515125/527492/504492/508658/533492/515187/282420/282637/522269/505709/507837/281848/535376/507632/540248/505453/280979/540481/504625/281768/780777/783645	34
bta04730	Long-term depression	30/1951	60/8735	2.23079e-06	2.23079e-06	5.28345e-05	281790/281878/529618/282648/282320/536654/540485/534626/533199/522866/287026/281985/281793/534996/613600/525072/614283/281216/282433/281792/100139857/282001/281716/281848/317697/521196/281879/282325/515159/282004	30
bta04072	Phospholipase D signaling pathway	59/1951	152/8735	2.82944e-06	2.82944e-06	5.95671e-05	505740/514554/517948/540803/537312/505238/532829/617707/513389/537171/538360/541056/528204/281601/281885/517887/280832/282308/511691/508819/527165/541008/515515/281136/527263/540485/507456/524734/526585/533199/522866/508794/513723/512112/287026/281985/281793/281987/535017/525931/511887/280685/506315/525072/504531/540085/534923/515621/282001/535298/282307/617172/535362/521196/519904/282137/525482/…	59
bta04510	Focal adhesion	72/1951	198/8735	4.04035e-06	4.04035e-06	7.6554e-05	513673/282564/790875/338037/517948/317711/281875/280794/282882/532712/506526/281450/282188/520030/280958/616294/281873/407142/506953/790892/537631/407170/617345/282308/527165/783470/540664/527263/529670/534526/281165/786886/524770/541281/524734/533199/520454/282191/503620/513432/505964/506270/525931/615430/540207/526409/281662/517433/504531/529939/540310/522269/534923/514902/282001/505709/515011/…	72
bta04611	Platelet activation	49/1951	121/8735	4.89385e-06	4.89385e-06	8.4296e-05	505740/338037/517948/510833/282323/282188/281790/509326/281601/281878/280958/282308/515515/536654/783470/527263/533459/526585/533125/522866/282022/287026/281985/533670/281793/535017/534996/613600/534816/280685/525072/504531/281216/282433/540310/534923/514902/515621/514898/515011/282642/282307/513244/317697/281879/614055/525482/280979/282004	49
bta04360	Axon guidance	66/1951	179/8735	5.9242e-06	5.9242e-06	9.354e-05	534731/536815/513673/790875/517948/512018/535137/532712/787473/510239/540756/512660/281790/525416/525767/407104/525946/518168/539452/534164/532713/286852/407128/613794/530719/616742/282308/614453/527349/445419/785942/533527/533746/527263/534526/100126171/540876/282321/523720/513432/539369/540595/505964/281987/506270/407151/540207/519843/407770/504531/286866/513539/282001/522767/617714/615883/2823…	66
bta04721	Synaptic vesicle cycle	35/1951	78/8735	7.6996e-06	7.6996e-06	0.000112221	523673/282368/518974/281511/523784/768228/282648/511691/282353/530692/508327/508794/282410/282378/540853/511839/282657/338089/513275/506315/338038/282363/282148/784636/282183/281080/282365/338075/616071/407118/616684/788566/282471/515216/100125225	35
bta04911	Insulin secretion	37/1951	85/8735	1.01037e-05	1.01037e-05	0.000132815	282357/505740/534568/509827/537312/282323/282356/785086/534129/525416/319095/281601/616576/520448/532713/506207/530719/513010/536654/404177/287026/281985/540853/281793/535017/538996/519758/534591/282001/408013/281879/788566/525482/282325/524144/282162/282573	37
bta04725	Cholinergic synapse	46/1951	114/8735	1.05932e-05	1.05932e-05	0.000132815	505740/525962/517948/526088/286850/282323/517519/785086/281790/534129/525416/281601/281878/532713/618399/282648/530719/282308/513010/536654/527263/281203/533199/282410/287026/281985/281884/535017/504531/281201/281792/534923/515621/282001/281883/282307/282178/408013/317697/281879/281020/525482/282325/282162/784876/281684	46
bta05412	Arrhythmogenic right ventricular cardiomyopathy (ARVC)	34/1951	76/8735	1.12155e-05	1.12155e-05	0.000132815	282564/281875/282161/282882/404144/506526/286800/281873/506953/535399/526848/517059/782690/281193/540307/527492/337925/506155/327667/327703/515011/282642/519644/408013/532127/514360/281062/538496/518117/280979/540481/780777/536607/539375	34
bta04916	Melanogenesis	42/1951	102/8735	1.40932e-05	1.40932e-05	0.000148753	790875/505740/505075/524255/537330/445420/282323/785086/281790/525416/281601/281885/532713/535399/280832/530719/513010/782690/445419/536654/533199/539277/617095/287026/281985/281793/535017/613288/281792/282001/540753/521196/533782/530005/281137/505453/525482/282325/540481/282162/280951/445416	42
bta04921	Oxytocin signaling pathway	57/1951	152/8735	1.41316e-05	1.41316e-05	0.000148753	505740/338037/526088/282161/282323/281790/525416/281601/286800/281878/515421/532713/286852/327677/530719/512254/536654/533527/786886/100295732/533199/539277/522866/617095/282321/287026/281985/327667/281793/505964/535017/613600/525072/282023/511504/281216/282433/534107/281792/100139857/515621/282001/327703/281883/519644/408013/317697/521196/281371/281879/511224/538496/521730/525482/282325/280979/2…	57
bta04070	Phosphatidylinositol signaling system	41/1951	99/8735	1.506e-05	1.506e-05	0.000150182	282087/517948/540771/507329/513389/537171/281878/513301/282308/508819/780855/535844/541155/539277/615813/617095/287026/281985/533289/614834/281987/616641/536810/511887/504531/535099/282001/539211/513057/282307/518488/317697/530577/508236/281879/534815/282325/519037/615135/507860/513986	41
bta04922	Glucagon signaling pathway	42/1951	103/8735	1.87278e-05	1.87278e-05	0.000177422	282357/508683/509827/282323/282356/785086/534129/525416/616576/281878/537451/281992/532713/286852/338446/530719/513010/536654/533527/513483/514066/515732/505472/539277/512571/617095/282321/287026/281985/507119/281793/539570/534107/515338/534923/317697/281879/505453/540682/282162/613629/506812	42
bta04720	Long-term potentiation	31/1951	69/8735	2.4447e-05	2.4447e-05	0.000203681	533908/282323/525416/281601/281878/537804/532713/286852/529618/530719/536654/533527/540485/517953/526227/533199/539277/617095/282321/287026/281985/535017/614283/282001/535158/317697/521196/281879/505453/282325/282162	31
bta05031	Amphetamine addiction	31/1951	69/8735	2.4447e-05	2.4447e-05	0.000203681	505740/509827/282323/785086/534129/525416/537804/532713/286852/529618/530719/513010/533527/534626/338445/281125/539277/617095/282321/281385/281793/529904/614283/282001/535158/408013/788566/282325/282471/282162/613629	31
bta04928	Parathyroid hormone synthesis, secretion and action	42/1951	104/8735	2.47246e-05	2.47246e-05	0.000203681	281038/505740/514554/509827/509500/282323/100124505/100336730/785086/281790/534129/281601/281878/540741/533656/282484/512254/524624/513010/407125/536654/533199/287026/281985/505169/281793/282886/535017/281637/281914/282887/282001/505242/317697/521196/507783/281879/281020/525482/282325/515159/281768	42
bta00534	Glycosaminoglycan biosynthesis - heparan sulfate / heparin	15/1951	24/8735	2.66108e-05	2.66108e-05	0.000210085	518563/511060/529260/524136/538691/514172/783970/540355/517768/538566/538602/281151/617069/521959/532099	15
bta04750	Inflammatory mediator regulation of TRP channels	41/1951	103/8735	4.58294e-05	4.58294e-05	0.000347339	505740/539334/517948/282323/541151/525416/281601/281878/532713/537631/530719/282308/536654/518542/539277/522866/617095/507041/515640/407230/287026/281985/281793/281987/535017/525072/504531/617930/282001/516039/286883/407169/507664/282307/317697/505708/281879/525482/282325/616593/282162	41
bta04012	ErbB signaling pathway	35/1951	84/8735	5.34924e-05	5.34924e-05	0.000384172	525906/513673/790875/517948/525416/532713/538751/537631/280737/530719/282308/534526/786886/524734/533199/540876/513432/281987/506270/511845/504531/540085/534923/282001/526469/282376/505709/535298/282307/521196/282325/281361/509613/539977/282162	35
bta04660	T cell receptor signaling pathway	42/1951	107/8735	5.47961e-05	5.47961e-05	0.000384172	525906/513673/790875/517948/281732/507026/532712/613842/281056/540824/407098/616115/286852/537631/617345/282308/533527/527263/529146/534526/281855/533199/533125/504509/282321/513432/535622/281987/281053/407152/281246/504531/534923/508367/535298/282307/513244/521196/511224/515377/281854/508233	42
bta04022	cGMP-PKG signaling pathway	60/1951	169/8735	5.67721e-05	5.67721e-05	0.000384172	505740/338037/534568/509827/781956/100336730/785086/281790/534129/281601/282641/281878/520448/282572/281972/286852/281700/512254/513010/281605/536654/282134/327716/533527/540307/533199/539277/617095/507041/337925/282321/287026/281985/505964/535017/613600/407151/281971/519758/281749/541168/281216/282433/534923/514902/515621/408013/613800/317697/521196/281879/511224/525482/518117/507792/515159/2820…	60
bta04390	Hippo signaling pathway	55/1951	152/8735	6.32705e-05	6.32705e-05	0.000413382	790875/614786/510255/505075/524255/537330/536993/445420/788948/768234/535399/538751/407128/526848/509290/282320/782690/281160/445419/508045/535935/509882/535509/533233/530910/515125/519937/527492/540595/286863/533815/407175/613288/520406/540488/282637/505059/100137840/540753/511619/535376/533782/530005/617525/507682/539292/535916/540248/280979/540481/534072/535699/780777/404101/445416	55
bta05215	Prostate cancer	39/1951	98/8735	7.01044e-05	7.01044e-05	0.000442764	790875/517948/535231/541166/511037/787068/785086/534129/540378/535399/616115/282308/513010/782690/527165/281855/533199/515700/527024/535183/525931/281309/504531/534923/505709/535298/282307/281848/281832/521196/541184/281020/505453/540481/404193/281768/281407/281854/508233	39
bta04310	Wnt signaling pathway	57/1951	161/8735	9.41721e-05	9.41721e-05	0.000560281	614346/790875/539639/505075/524255/537330/445420/282323/525416/407228/520189/785152/768234/532713/535399/541161/286852/537631/530719/782690/282684/785924/445419/529698/533527/529146/540179/515972/533233/513742/282321/287026/281985/530147/536121/505423/286794/613288/282420/282001/540753/511619/533782/530005/511475/353106/511224/540248/505453/282325/540481/534072/281730/282068/282162/445416/531389	57
bta04120	Ubiquitin mediated proteolysis	51/1951	140/8735	9.46252e-05	9.46252e-05	0.000560281	525906/614471/534349/514387/784986/505133/515376/617083/508513/407228/540378/510924/514572/530333/616156/537885/521975/530858/534604/528138/282869/509231/538029/534211/614512/535219/508431/514445/506962/515582/513789/509471/520833/506103/783986/787118/540537/512457/505512/613676/100138178/616275/523962/518857/100138545/616130/534072/784326/615599/533336/513868	51
bta04152	AMPK signaling pathway	46/1951	123/8735	9.98753e-05	9.98753e-05	0.000573447	517948/508683/511451/785086/534129/528204/281052/537451/617419/338446/282704/509290/282308/100125881/617316/513010/282320/282134/508045/513483/514066/539180/535530/529146/533617/407159/507119/508373/287019/504531/407235/526310/534107/515338/534923/507056/515024/282307/281848/505757/281993/534928/521730/509613/613629/506812	46
bta04912	GnRH signaling pathway	37/1951	93/8735	0.000107304	0.000107304	0.00059798	505740/514554/532712/282323/525416/281601/281878/532713/537631/530719/407125/541008/536654/786886/533199/539277/522866/617095/287026/281985/281793/535017/525072/282001/526469/516039/286883/535298/523962/408013/317697/521196/505708/281879/525482/282325/282162	37
bta04971	Gastric acid secretion	31/1951	74/8735	0.000124775	0.000124775	0.000675471	505740/338037/317654/282323/533343/281790/525416/281601/281878/532713/530719/536654/281574/539277/617095/614308/287026/281985/281793/535017/617196/519758/282001/281883/317697/281879/525482/282325/282162/539250/784876	31
bta04668	TNF signaling pathway	44/1951	118/8735	0.0001517	0.0001517	0.000798419	517948/509827/281094/785086/534129/519958/616115/537631/613667/615107/282308/281839/513010/521987/540944/537380/529146/508105/281855/504408/533199/541268/508431/783681/535622/281309/338033/504531/282023/444867/534923/526469/516039/286883/508367/282307/506182/281137/504727/282122/516353/281854/508233/493720	44
bta04961	Endocrine and other factor-regulated calcium reabsorption	23/1951	50/8735	0.000173805	0.000173805	0.000890041	282323/282641/533656/511691/536654/407238/540307/337925/508794/287026/281985/281793/506315/519758/784636/282183/282001/281080/613800/507783/525482/282325/515216	23
bta04150	mTOR signaling pathway	54/1951	154/8735	0.000189187	0.000189187	0.000943315	790875/517948/505075/511451/519920/524255/537330/509863/533908/445420/617367/407210/528204/505850/282308/445419/787914/517953/526227/533199/533861/508327/534917/282657/617606/338089/613288/504531/534624/526310/506974/526642/534923/282001/507056/526652/540753/515024/535298/282307/534045/527459/281848/521196/533782/530005/508487/512530/532704/282325/509613/281854/445416/507107	54
bta04015	Rap1 signaling pathway	71/1951	216/8735	0.000204314	0.000204314	0.000979731	505740/517948/540803/537312/505238/532712/532839/532952/532829/281094/281790/281601/537804/281885/280832/407170/617345/616742/282308/317696/614453/281160/527165/536654/783470/281136/280939/526585/533199/539277/617095/520454/513723/503620/287026/281985/533670/281793/617915/281987/535017/282140/525931/515187/539767/504531/281792/282637/534923/514902/282001/516039/286883/515011/282642/282307/535347/…	71
bta04014	Ras signaling pathway	78/1951	242/8735	0.000206832	0.000206832	0.000979731	513673/525962/514554/533491/517948/540803/281148/505238/614911/532712/286850/282323/281094/537804/281885/532393/616115/537631/527214/280832/407170/618399/616742/282308/540027/317696/614453/281160/527165/280939/534526/281855/786886/281203/524734/533199/539277/533125/522866/617095/540876/504509/513723/503620/514886/513432/617915/282152/281987/282140/525931/539767/511845/525072/504531/281201/540085/…	78
bta04925	Aldosterone synthesis and secretion	37/1951	96/8735	0.000230791	0.000230791	0.00106656	505740/509827/282323/785086/534129/525416/281601/282641/281878/532713/530719/281276/513010/536654/539277/617095/507041/287026/281985/281793/539586/535017/281971/519758/511504/282346/282001/282411/408013/613800/317697/281879/525482/282325/538021/282162/523665	37
bta04340	Hedgehog signaling pathway	23/1951	51/8735	0.00025037	0.00025037	0.00109995	790875/512018/510255/768006/282323/407228/768234/280834/282874/407190/506060/282684/527889/281637/540830/282136/530618/281020/616130/534072/535067/536011/282682	23
bta04666	Fc gamma R-mediated phagocytosis	36/1951	93/8735	0.000252305	0.000252305	0.00109995	514554/517948/504482/614576/523797/532712/617707/507329/614722/617345/282308/511691/508819/515515/535077/533199/522866/507041/280814/281987/327705/534996/407152/525072/504531/513539/534923/514902/282001/282307/617172/281935/521196/505708/282325/535225	36
bta05030	Cocaine addiction	22/1951	48/8735	0.000255432	0.000255432	0.00109995	505740/509827/282323/785086/541056/281790/534129/537804/616115/513010/338445/281125/281385/281793/614283/282173/281453/100137840/535158/519904/282471/508233	22
bta04934	Cushing syndrome	54/1951	156/8735	0.000274812	0.000274812	0.0011571	790875/505740/524446/509827/505075/524255/537330/540688/445420/282323/785086/511754/281790/521831/534129/525416/281601/281878/540741/532713/535399/530719/281276/513010/782690/445419/536654/533233/533199/281948/287026/281985/281793/535017/613288/281880/520260/282346/282411/540753/281716/511619/506787/408013/317697/533782/530005/281879/541184/525482/540481/282162/445416/360190	54
bta00030	Pentose phosphate pathway	15/1951	28/8735	0.000303188	0.000303188	0.00124883	508683/534402/534558/506980/616120/513483/514066/281179/781227/280910/613376/507119/514939/507949/513453	15
bta04261	Adrenergic signaling in cardiomyocytes	52/1951	150/8735	0.000339517	0.000339517	0.00136871	505740/509827/537312/282161/317654/282323/785086/281790/534129/525416/281601/282641/286800/532713/509290/530719/535277/513010/282320/281605/536654/282134/508045/540307/533617/504408/539277/281544/617095/337925/287026/281985/327667/281793/535017/538100/519758/534923/515621/282001/327703/505757/519644/408013/613800/282061/281020/538496/525482/518117/282162/784876	52
bta04270	Vascular smooth muscle contraction	47/1951	133/8735	0.000393217	0.000393217	0.00155217	505740/338037/534568/527140/614911/282323/617017/281601/281878/520448/515421/527214/536654/282134/518542/533199/539277/522866/617095/507041/281595/287026/281985/281793/505964/535017/613600/614663/407218/514876/525072/281749/281216/282433/282001/408013/317697/521196/505708/281879/281137/525482/282325/515159/282004/524144/282573	47
bta04726	Serotonergic synapse	42/1951	116/8735	0.000440287	0.000440287	0.00170251	280722/505740/525962/526088/286850/282323/540416/281790/281878/618399/282648/317708/540657/536654/338445/404177/281203/533199/522866/282410/282022/407230/287026/281985/281793/525072/281201/282023/281792/282001/282365/282139/407169/529593/408013/317697/521196/281879/282325/616593/282471/404074	42
bta05032	Morphine addiction	35/1951	92/8735	0.000449374	0.000449374	0.00170289	505740/525962/524446/526088/286850/282323/100124505/281790/281601/281970/615885/282238/618399/282648/540657/524624/281958/281203/281125/282410/281793/535017/281637/281971/281201/282136/281792/282001/529593/506787/513785/525482/282325/281801/282682	35
bta04625	C-type lectin receptor signaling pathway	39/1951	106/8735	0.000481214	0.000481214	0.00174237	525906/517948/281856/540803/510814/540824/504282/281878/540378/511023/511022/616115/286852/537631/282308/515515/533527/526233/281855/539277/509855/617095/282321/281246/504531/282023/536421/534923/508367/282307/317697/521196/505708/281879/511224/526392/281854/508233/508832	39
bta01200	Carbon metabolism	41/1951	113/8735	0.000487381	0.000487381	0.00174237	508683/281235/286840/505103/509481/533910/616576/280976/616120/512995/507688/533044/513483/514066/540985/281179/781227/280910/512571/613376/511090/614302/506459/282873/507119/613338/531682/520260/514939/516783/618400/327669/537713/507949/507817/533630/767880/280817/525813/338471/513453	41
bta04670	Leukocyte transendothelial migration	41/1951	113/8735	0.000487381	0.000487381	0.00174237	538846/517948/282184/537312/282882/532712/281790/768307/617345/526848/282308/281839/541008/281574/540426/509230/524770/527492/506545/505964/281987/506270/515187/539767/281346/504531/540310/522269/514902/282001/282303/282307/512405/614055/282325/281874/280979/780777/783645/513412/508234	41
bta04915	Estrogen signaling pathway	48/1951	138/8735	0.000518216	0.000518216	0.0018183	505740/517948/509827/526088/282323/785086/281790/534129/281601/281878/540741/282308/513010/536654/540485/407238/281958/524734/281146/533199/539277/617095/287026/281985/281793/535017/100848466/504531/281792/534923/534280/788424/788909/505214/618453/507464/281889/535298/282307/281832/317697/521196/505708/535704/281879/513785/281020/525482	48
bta04933	AGE-RAGE signaling pathway in diabetic complications	38/1951	103/8735	0.000531453	0.000531453	0.00183084	517948/317711/280794/510833/510814/540771/532712/280686/282188/616115/537631/282308/281839/407125/515125/507041/281250/282191/287026/281985/281987/504531/534923/282001/282376/513057/282307/535376/505708/281137/511224/281020/540248/282325/519037/282122/378474/508233	38
bta01521	EGFR tyrosine kinase inhibitor resistance	31/1951	80/8735	0.000647529	0.000647529	0.00219089	790875/517948/519920/507359/537201/407170/282308/527165/787914/535530/524734/533199/507390/282152/281987/525931/504531/540085/534923/282001/280877/505709/535298/282307/281848/521196/281020/282325/404193/281361/509613	31
bta04935	Growth hormone synthesis, secretion and action	42/1951	118/8735	0.000661966	0.000661966	0.00220044	790875/505740/517948/509827/510814/282323/785086/281790/534129/281601/281878/537631/282308/513010/536654/524734/533199/287026/281985/281793/281191/281987/506270/535017/504531/534923/282001/526469/516039/282376/286883/535298/282307/523962/280805/408013/317697/521196/281879/505453/525482/282325	42
bta00514	Other types of O-glycan biosynthesis	20/1951	45/8735	0.000787587	0.000787587	0.00257288	533703/282073/618078/532545/444859/506903/513167/508488/281781/526331/537054/540500/360194/614203/789150/504951/508782/282241/505622/616218	20
bta04114	Oocyte meiosis	42/1951	119/8735	0.000806131	0.000806131	0.00258882	505740/614056/533908/282323/515376/525416/407228/281601/506740/281878/532713/286852/514572/530719/282320/533527/517953/526227/282370/533617/533199/539277/617095/514777/282321/286863/535017/100848466/783986/540537/616275/281848/505757/317697/281879/525482/517837/537016/534072/535342/282162/281061	42
bta04926	Relaxin signaling pathway	45/1951	130/8735	0.000857342	0.000857342	0.0027074	505740/525962/517948/317711/509827/510833/286850/282323/785086/282188/281790/534129/281601/616115/537631/618399/282308/513010/281203/524734/533199/282191/507053/287026/281985/281793/535017/281637/281914/281308/504531/281201/281792/534923/282001/282876/526469/535298/282307/535376/521196/281137/525482/282122/508233	45
bta05221	Acute myeloid leukemia	27/1951	68/8735	0.000914716	0.000914716	0.00282541	517948/529631/512237/535399/616115/280832/282308/782690/281855/533199/538628/534401/507100/504531/534923/282376/511206/534280/535298/282307/100138545/521196/353106/540481/509613/281854/508233	27
bta00230	Purine metabolism	46/1951	134/8735	0.000924537	0.000924537	0.00282541	505740/511200/524446/281976/280716/613448/100124505/517063/534402/281601/281970/282244/510949/281972/504439/506980/281973/281217/524624/525937/768044/281363/529405/615535/282246/281229/781227/512571/615606/280960/614149/280712/535017/613600/281971/534611/281216/282433/506787/511269/692183/525482/536409/282223/281951/783572	46
bta04071	Sphingolipid signaling pathway	42/1951	120/8735	0.000977343	0.000977343	0.00293938	514554/517948/616901/781956/281790/616115/537631/615296/505233/509290/282308/540305/282320/539123/536654/540732/508045/614165/527263/537380/533617/537972/533199/507041/287026/281985/504531/534923/282001/282307/614354/540994/505757/521196/281020/281588/282325/515159/533538/510620/522515/508233	42
bta05213	Endometrial cancer	24/1951	59/8735	0.00116136	0.00116136	0.00343824	790875/517948/535399/526848/282308/782690/535530/786886/533233/541218/533199/527492/540207/504531/282637/534923/505709/535298/511619/282307/533652/521196/540481/780777	24
bta04211	Longevity regulating pathway	33/1951	90/8735	0.00135656	0.00135656	0.00389444	505740/517948/509827/519920/509863/282323/785086/534129/528204/281601/616115/338446/282308/513010/535530/281496/528606/535017/539858/531682/504531/407235/526310/534107/534923/507056/282307/281848/281993/525482/509613/613629/508233	33
bta04540	Gap junction	33/1951	90/8735	0.00135656	0.00135656	0.00389444	505740/282323/281790/281601/281878/540236/527165/536654/281136/281193/540485/100295732/281125/533199/407230/287026/281985/281793/535017/613600/525931/281216/282433/282001/535298/317697/521196/281879/534206/525482/282325/282004/281061	33
bta00561	Glycerolipid metabolism	26/1951	67/8735	0.00167465	0.00167465	0.00473585	407225/617707/513389/537171/519739/280843/507456/535192/537224/512112/282609/407226/614494/511887/508629/513967/617172/505290/507949/541284/282137/529067/497202/515764/530414/511614	26
bta05132	Salmonella infection	69/1951	224/8735	0.0018301	0.0018301	0.00509935	531741/539679/507215/526329/100141021/532712/282466/537690/613724/528654/781426/281577/513641/515421/404108/517887/519958/535399/616115/407237/768307/537631/518833/509080/511691/782690/280950/535127/506218/529146/534526/281165/281855/511866/282689/533199/512480/507311/540815/505964/407152/538050/515552/519789/787862/534923/505568/281338/526469/516039/286883/508999/537748/281832/613533/521196/5103…	69
bta05165	Human papillomavirus infection	100/1951	345/8735	0.00195916	0.00195916	0.00537983	282564/790875/517948/280872/317711/281875/280794/505075/514561/282882/510814/524255/537330/532712/536993/445420/282323/537201/506526/281450/785086/511754/282188/520030/534129/528204/518974/280958/281873/407142/540378/511023/506953/616115/767928/509290/282308/513010/282320/782690/282684/527165/445419/508045/540664/538619/529670/509882/533949/281855/533233/541281/533617/533199/512571/509855/508327/…	100
bta04151	PI3K-Akt signaling pathway	107/1951	373/8735	0.00202291	0.00202291	0.00547555	282564/790875/525962/517948/317711/281875/509827/280794/519920/282882/286850/507359/519754/532829/537201/506526/281094/281450/785086/511754/282188/520030/534129/528204/537451/280958/281885/281873/505850/407142/540378/506953/532393/616115/538751/280832/407170/618399/509290/616742/282308/509080/281144/513010/317696/614453/282320/281160/527165/515515/281136/280939/787914/508045/540664/529670/535530/…	107
bta05146	Amoebiasis	40/1951	117/8735	0.00210551	0.00210551	0.00561886	517948/281856/317711/280794/510833/282323/513217/282188/520030/281601/616115/613667/282308/281789/536654/529670/513608/524770/518752/515700/515640/282191/287026/281985/281793/506270/538050/281246/504531/529939/522269/282001/282876/282307/509970/524513/100124520/282325/783645/508233	40
bta04066	HIF-1 signaling pathway	38/1951	110/8735	0.00217784	0.00217784	0.00573115	517948/508683/280705/519920/507359/525647/282356/525416/532713/616115/530719/282308/280939/787914/533199/503620/535219/507119/617915/281987/282140/504531/534923/282001/282876/505709/282307/281848/535578/281137/281020/505453/282325/767880/509613/282162/280817/508233	38
bta04927	Cortisol synthesis and secretion	25/1951	65/8735	0.00235553	0.00235553	0.00611385	505740/509827/540688/282323/785086/534129/281601/281878/540741/281276/513010/536654/281948/287026/281985/281793/535017/281880/282346/282411/506787/408013/317697/281879/525482	25
bta04924	Renin secretion	27/1951	72/8735	0.00246962	0.00246962	0.00632334	505740/282323/281790/319095/281878/281970/286852/281605/536654/281105/533527/539277/617095/282321/287026/281985/281793/613600/281749/281216/282433/281883/408013/317697/281879/281137/282573	27
bta04722	Neurotrophin signaling pathway	41/1951	122/8735	0.00267809	0.00267809	0.0067657	790875/517948/533908/532712/525416/532393/532713/616115/537631/530719/282308/504668/535530/537380/517953/526227/100295732/524734/504408/533199/539277/617095/520454/540876/281987/504531/540085/614726/534923/534170/535298/282307/523962/539126/521196/515034/505708/281020/281854/282162/508233	41
bta05225	Hepatocellular carcinoma	55/1951	174/8735	0.00274127	0.00274127	0.00683418	790875/100125416/517948/505075/524255/537330/540181/445420/511754/533232/282388/535399/414274/282308/782690/282684/445419/540904/507648/786886/533233/541218/524734/533199/515125/282152/281987/613288/504531/540085/615552/537412/526153/534923/282001/540753/789613/535298/511619/282307/281848/506557/535376/521196/533782/530005/768055/541184/540248/282325/504476/280979/540481/613905/445416	55
bta05135	Yersinia infection	43/1951	130/8735	0.00300456	0.00300456	0.00739332	790875/517948/504482/280794/282882/540304/533908/532712/519754/281577/281873/519958/616115/537631/617345/282308/509080/508819/541008/517953/529146/526227/281855/533199/504509/524352/281987/506270/281246/504531/534923/526469/516039/286883/507837/282307/535347/513244/511224/535225/280979/281854/508233	43
bta00562	Inositol phosphate metabolism	27/1951	73/8735	0.00310063	0.00310063	0.00743655	282087/517948/540771/507329/513301/508819/534118/535844/541155/615813/523736/287026/281985/533289/281987/536810/504531/535099/539211/513057/518488/530577/534815/519037/615135/507860/513986	27
bta05100	Bacterial invasion of epithelial cells	27/1951	73/8735	0.00310063	0.00310063	0.00743655	531741/517948/504482/280794/532712/509821/281577/281873/526848/282308/511691/524734/527492/508794/508361/506270/540207/506315/504531/510704/540085/282637/281080/282307/280979/780777/783645	27
bta04380	Osteoclast differentiation	44/1951	134/8735	0.00316438	0.00316438	0.00749458	517948/510814/537201/281094/613317/511023/519958/616115/286852/537631/282308/515515/533527/527263/529146/533459/281855/533199/509855/510008/515640/281250/282321/509889/327666/507100/281346/504531/536421/534923/286883/508367/282642/535298/282307/513244/535376/281993/511224/510393/526392/281854/508233/531389	44
bta04659	Th17 cell differentiation	38/1951	113/8735	0.00371033	0.00371033	0.00867913	539334/529631/510814/509500/507359/537201/281056/507778/511022/407098/616115/286852/537631/533527/506053/281855/535597/515125/504509/515640/282321/505169/281861/281987/281053/282376/538933/534280/281832/535376/618722/506214/511224/540248/404154/617967/281854/508233	38
bta04914	Progesterone-mediated oocyte maturation	31/1951	88/8735	0.00381896	0.00381896	0.00878628	505740/517948/533908/282323/281790/281601/537631/514572/282308/530333/517953/526227/533199/514777/505847/535017/100848466/504531/783986/540537/534923/616275/526376/282307/281848/281832/521196/525482/517837/537016/281061	31
bta05166	Human T-cell leukemia virus 1 infection	70/1951	234/8735	0.00384888	0.00384888	0.00878628	505740/517948/281148/509827/282323/537201/281156/515376/282356/785086/534129/281601/506740/407098/281033/616115/286852/537631/514572/282308/281036/281839/508641/513010/407125/783470/533527/281855/786886/533199/515125/515700/515640/282321/539369/281861/282152/286849/535017/507100/286794/281053/504531/783986/541168/540537/534923/526469/282376/508367/616275/282307/523962/540230/535376/618722/506214/…	70
bta04810	Regulation of actin cytoskeleton	64/1951	211/8735	0.00392156	0.00392156	0.00884563	513673/282564/338037/517948/540803/504482/281875/280794/317654/100141021/282882/532712/286850/787068/506526/281577/513641/281873/506953/617345/518833/282308/508819/317696/281160/527165/281136/535077/281574/534526/540426/524770/533233/526585/533199/525628/524352/513432/533289/505964/506270/525931/517111/280685/504531/513539/540310/522269/539211/515011/282642/507837/282307/532127/521196/614055/2818…	64
bta04931	Insulin resistance	37/1951	110/8735	0.00413767	0.00413767	0.00922329	282357/790875/517948/533908/282356/785086/534129/281052/537451/281992/616115/338446/537631/513787/282308/513010/517953/526227/505472/507041/281779/514427/514460/534649/538465/508658/504531/783217/534107/515338/534923/282307/505708/282325/281854/508233/506812	37
bta04371	Apelin signaling pathway	45/1951	140/8735	0.00449922	0.00449922	0.00991261	505740/338037/525962/507414/540803/317654/286850/282323/100336730/281790/281601/281878/338446/618399/512254/407125/536654/787914/540307/281203/533199/515125/539277/617095/507041/337925/287026/281985/783681/535017/281201/534107/282637/100139857/534923/515621/282876/504242/317697/521196/281879/534815/540248/525482/281407	45
bta04919	Thyroid hormone signaling pathway	39/1951	118/8735	0.00464307	0.00464307	0.010112	790875/538979/517948/281875/317654/510814/540771/509500/282323/282356/528204/540378/282308/327716/541240/407238/533199/525389/534649/287026/281985/281987/287019/519758/504531/517336/534923/282001/507663/513057/282642/282307/521196/525636/505453/282325/518117/280979/519037	39
bta05205	Proteoglycans in cancer	62/1951	205/8735	0.00480977	0.00480977	0.010356	282564/517948/540803/281875/280794/505075/317654/524255/537330/532712/445420/282323/540060/282188/525416/282094/281878/281873/505850/540378/532713/407170/617345/530719/282308/445419/787914/407238/281574/615239/540426/281165/786886/533199/281987/506270/517111/281057/613288/504531/540085/534923/282001/505709/540753/282642/535298/282307/281848/317697/613533/521196/533782/530005/281879/282325/280979/…	62
bta04910	Insulin signaling pathway	44/1951	137/8735	0.00501247	0.00501247	0.0106711	525906/790875/517948/519920/282323/525647/282463/528204/616576/537451/338446/537631/282308/533171/787914/513483/514066/515732/786886/505472/524734/533199/539277/617095/520454/100139988/508658/504531/534107/515338/534923/505568/507056/615679/535298/282307/521196/532573/505370/540682/504625/509613/281854/280817	44
bta04923	Regulation of lipolysis in adipocytes	22/1951	58/8735	0.00510416	0.00510416	0.0107456	505740/517948/282323/282330/281790/504216/281601/504813/282308/281605/281553/282022/281793/535017/504531/282023/534923/282307/505290/535588/525482/282004	22
bta04929	GnRH secretion	24/1951	65/8735	0.00526347	0.00526347	0.0109592	517948/526088/281878/282308/536654/404177/281146/533199/287026/281985/281637/504531/534923/534591/282001/282411/538255/282307/408013/317697/521196/281879/513785/282325	24
bta04142	Lysosome	40/1951	123/8735	0.00571647	0.00571647	0.0117731	531327/512361/518974/521189/534634/281909/533177/504310/282272/505738/281105/281849/536359/767602/538401/533428/404187/511839/282657/404155/515944/338038/506192/282148/282271/513067/281080/789125/618267/784163/510524/507188/536435/505554/520564/100125267/510620/509427/281433/509715	40
bta04064	NF-kappa B signaling pathway	35/1951	105/8735	0.0061011	0.0061011	0.0124301	540824/519271/519958/616115/613667/281839/515515/540944/529146/508105/616179/533459/281855/539350/504509/515640/504507/282152/281987/286849/534996/282023/536421/282420/510923/508367/506182/504727/281020/282325/515377/510393/526392/281854/508233	35
bta01230	Biosynthesis of amino acids	26/1951	73/8735	0.00653118	0.00653118	0.0131647	508683/514525/281235/505103/514209/280976/510583/512995/533044/513608/280887/781227/512571/518752/613376/507119/613338/516783/618400/327669/533630/767880/280869/541078/338471/513453	26
bta00600	Sphingolipid metabolism	19/1951	49/8735	0.00681013	0.00681013	0.0135825	616901/617707/615296/505233/540732/614165/537972/533428/615110/514201/617172/614354/540994/507188/505554/505558/533538/510620/522515	19
bta04664	Fc epsilon RI signaling pathway	25/1951	70/8735	0.00727255	0.00727255	0.0143537	517948/507329/537631/617345/282308/515515/527263/533459/533199/522866/613869/281987/534996/525072/504531/534923/282001/526469/516039/286883/535298/282307/513244/521196/404074	25
bta04930	Type II diabetes mellitus	18/1951	46/8735	0.00747485	0.00747485	0.0146009	282357/517948/616576/537631/282648/282308/512571/507041/282410/538996/353113/504531/282411/282307/408013/505708/281854/280817	18
bta05231	Choline metabolism in cancer	33/1951	99/8735	0.00760358	0.00760358	0.0147008	514554/517948/504482/530146/507455/617707/513389/537171/528204/540741/537631/282308/508819/527165/519461/526175/533199/522866/513723/281987/525931/511887/525072/504531/534923/282001/535298/282307/617172/521196/520625/282325/509613	33
bta04512	ECM-receptor interaction	30/1951	89/8735	0.0089297	0.0089297	0.0170903	282564/317711/281875/280794/282882/506526/281450/282188/520030/281052/280958/281873/407142/506953/281227/508018/540664/529670/538430/541281/282191/281057/526409/517433/529939/515011/282642/527014/532127/282654	30
bta04140	Autophagy - animal	44/1951	142/8735	0.0101066	0.0101066	0.0191494	517948/507414/508571/540803/282323/509587/617367/528204/537631/787344/282308/100125881/282320/540873/281105/529146/408003/514919/533199/535820/539339/282152/539858/617606/517263/614285/538050/504531/535099/519982/526310/534923/508631/507056/282307/281848/787967/317697/521196/505708/509970/534815/281020/768316	44
bta04370	VEGF signaling pathway	21/1951	58/8735	0.011185	0.011185	0.0208046	517948/532712/530059/286852/407170/282308/533527/533199/522866/282321/281987/506270/525072/504531/282023/534923/282001/282307/521196/615215/282325	21
bta05222	Small cell lung cancer	31/1951	94/8735	0.0111998	0.0111998	0.0208046	517948/317711/281875/280794/509500/615827/511754/520030/616115/282308/540944/529670/281855/541218/540616/282191/282152/506270/504531/282023/529939/534923/282876/515011/282307/506182/692183/541184/281020/281854/508233	31
bta00512	Mucin type O-glycan biosynthesis	13/1951	31/8735	0.0113963	0.0113963	0.0209641	618078/532545/506903/508488/526331/404167/540500/282351/614203/504951/282241/505622/616218	13
bta05212	Pancreatic cancer	26/1951	76/8735	0.0116542	0.0116542	0.0212324	514554/517948/505238/510814/532712/537201/511754/616115/537631/282308/281855/541218/533199/515125/513723/282152/504531/534923/505709/282307/535376/521196/541184/540248/281854/508233	26
bta04144	Endocytosis	70/1951	245/8735	0.0122651	0.0122651	0.0219236	525906/506187/514554/519597/281802/538505/538771/338052/614576/540304/523797/532712/317659/514465/614722/281577/532778/510994/540378/517887/506374/536671/100125881/511691/281276/508819/317696/512450/281849/510489/512029/515125/508794/523736/511223/534027/512734/508431/281861/539295/327705/513789/281022/507572/281637/506315/282136/535566/614521/538348/784636/282183/281080/505336/100138545/281848/5…	70
bta05163	Human cytomegalovirus infection	70/1951	245/8735	0.0122651	0.0122651	0.0219236	790875/505740/525962/517948/767864/281875/509827/286850/507359/282323/282330/537201/785086/511754/281790/534129/528204/281601/281878/540741/540378/616115/286852/618399/282308/281036/513010/533661/541008/536654/533527/281855/786886/281203/533199/539277/617095/515640/282321/287026/281985/281793/506270/535017/513478/504531/281201/282023/281792/534923/282001/286883/282642/535298/282307/317697/521196/…	70
bta04727	GABAergic synapse	30/1951	91/8735	0.0125187	0.0125187	0.0221679	505740/525962/537873/523970/286850/282323/281790/281601/523784/615885/282238/618399/282648/540657/281203/282410/512459/535017/281201/281792/282001/529593/408013/616071/326576/407118/513785/525482/280969/282325	30
bta04146	Peroxisome	28/1951	84/8735	0.0132519	0.0132519	0.0232489	531027/512676/613679/317658/281235/526059/509481/281092/506631/514832/506059/511716/533077/281496/515178/280960/525262/531682/507393/505792/615334/282876/509102/327669/535508/505355/768256/514159	28
bta00500	Starch and sucrose metabolism	13/1951	32/8735	0.0153508	0.0153508	0.0263608	615745/280812/517397/534402/616576/537451/539625/506980/529405/615535/505472/522889/280817	13
bta00240	Pyrimidine metabolism	20/1951	56/8735	0.015406	0.015406	0.0263608	281568/534937/616377/281124/541028/506131/515029/768044/281363/529405/615535/767849/504261/509241/534611/504557/507631/282223/281951/784292	20
bta00270	Cysteine and methionine metabolism	18/1951	49/8735	0.015443	0.015443	0.0263608	514525/505103/508712/525563/281119/533044/615764/615950/514462/359716/528582/508158/508345/516783/521553/512468/280869/541078	18
bta00564	Glycerophospholipid metabolism	33/1951	104/8735	0.0166248	0.0166248	0.0281247	514554/504948/614911/617707/513389/537171/515361/519739/527214/507456/526175/522866/537224/512112/614834/512761/511887/525072/541208/514646/282271/504236/360197/535126/617172/788450/514456/541284/282137/529067/497202/530414/511614	33
bta04970	Salivary secretion	30/1951	93/8735	0.0171944	0.0171944	0.028578	505740/317654/282323/281601/282641/281878/327677/281605/536654/282134/539277/617095/287026/281985/281793/535017/613600/519758/281216/282433/534591/282001/280844/613800/317697/281879/525482/282325/282004/282573	30
bta05235	PD-L1 expression and PD-1 checkpoint pathway in cancer	30/1951	93/8735	0.0171944	0.0171944	0.028578	517948/510814/537201/613842/281056/407098/616115/286852/282308/533834/533527/281855/539350/533199/533125/617628/504509/282321/281987/281053/504531/282420/534923/516039/286883/282307/521196/511224/281854/508233	30
bta05211	Renal cell carcinoma	24/1951	71/8735	0.0174765	0.0174765	0.0287942	513673/517948/532712/282356/282308/534526/520800/533199/520454/282711/513432/535219/520260/504531/540085/534923/526652/535298/282307/533445/535578/521196/505453/540313	24
bta04024	cAMP signaling pathway	65/1951	229/8735	0.0177572	0.0177572	0.0290046	505740/514554/517948/537312/317654/282323/282330/100124505/785086/281790/534129/525416/790124/319095/504216/281601/282641/537804/281992/532713/616115/537631/504813/281700/529618/617345/317708/530719/282308/524624/513010/281605/534626/281553/281125/526585/533199/539277/617095/281793/505964/535017/529904/519758/504531/614283/281749/540830/534923/535158/282307/408013/613800/521196/281371/513785/2811…	65
bta04218	Cellular senescence	49/1951	166/8735	0.0179688	0.0179688	0.0290993	517948/540803/767940/512233/511754/528204/281878/540378/616115/286852/282308/327716/533527/535530/616801/618104/533199/515125/539277/617095/281250/282321/524870/538866/539767/281662/504531/541168/616597/281420/533294/534923/516039/286883/282307/408013/535376/317697/521196/281879/541184/511224/534072/509613/536656/281061/613629/540313/508233	49
bta04550	Signaling pathways regulating pluripotency of stem cells	42/1951	139/8735	0.0182944	0.0182944	0.0293755	790875/517948/527910/281598/505075/530430/524255/537330/445420/537201/507415/407128/530506/282308/317696/782690/445419/520842/533233/533199/515125/540806/510666/613288/504531/540488/534923/540753/535298/511619/282307/281848/521196/533782/530005/540248/528946/404193/281768/530748/404101/445416	42
bta04658	Th1 and Th2 cell differentiation	31/1951	98/8735	0.0207336	0.0207336	0.0330123	281856/617389/510814/515988/282452/537201/281056/407098/616115/286852/767928/537631/533527/281855/504509/282321/783681/505169/281861/281987/540059/521194/281053/282376/538933/618722/506214/511224/404154/281854/508233	31
bta05033	Nicotine addiction	15/1951	40/8735	0.021281	0.021281	0.0336016	517519/537804/615885/282238/529618/282648/540657/534626/282410/529904/614283/535158/529593/282178/100125225	15
bta04723	Retrograde endocannabinoid signaling	45/1951	152/8735	0.0215065	0.0215065	0.0336769	505740/525962/526088/286850/282323/281790/541291/281601/281878/613541/615885/282238/537631/618399/529618/282648/540657/338079/536654/540485/534626/404161/281203/282410/287026/281985/535017/529904/287327/281201/282023/614283/281792/282001/327691/529593/408013/505290/317697/281879/525482/282325/538021/100125225/523665	45
bta00020	Citrate cycle (TCA cycle)	12/1951	30/8735	0.0222761	0.0222761	0.0345961	281235/286840/533910/280976/512995/511090/613338/520260/511135/327669/537713/338471	12
bta05414	Dilated cardiomyopathy (DCM)	31/1951	99/8735	0.0239102	0.0239102	0.0368321	282564/505740/281875/282161/282882/282323/404144/506526/281601/286800/281873/506953/517059/535277/540307/281544/337925/506155/327667/281793/535017/327703/515011/282642/519644/408013/532127/538496/525482/518117/280979	31
bta04744	Phototransduction	11/1951	27/8735	0.0243894	0.0243894	0.0372673	281802/281700/281973/282246/282474/539277/617095/281201/281453/282243/286851	11
bta05214	Glioma	25/1951	77/8735	0.0258291	0.0258291	0.0388407	517948/511754/525416/540378/532713/530719/282308/527165/541218/524734/533199/539277/617095/281987/504531/511504/534923/282001/535298/282307/281848/521196/541184/282325/282162	25
bta05220	Chronic myeloid leukemia	25/1951	77/8735	0.0258291	0.0258291	0.0388407	517948/529631/511754/540378/616115/282308/281855/541218/524734/533199/515125/540876/282152/504531/534923/282376/535298/282307/535376/521196/541184/540248/281730/281854/508233	25
bta05230	Central carbon metabolism in cancer	22/1951	66/8735	0.0261632	0.0261632	0.0390333	282357/517948/508683/282356/616576/280832/282308/527165/281179/533199/512571/507119/504531/534923/505709/282307/539126/521196/404193/281768/515924/280817	22
bta00330	Arginine and proline metabolism	17/1951	48/8735	0.0265162	0.0265162	0.039251	506961/100126042/507327/513608/338445/615950/510525/518752/527211/414348/508629/615334/508542/286822/282876/513967/505323	17
bta04918	Thyroid hormone synthesis	24/1951	74/8735	0.0289498	0.0289498	0.0425211	505740/509827/282323/785086/534129/281601/281878/513010/536654/534110/281553/287026/281985/281793/280706/535017/519758/282001/509121/317697/281879/525482/282325/506406	24
bta04216	Ferroptosis	16/1951	45/8735	0.0297261	0.0297261	0.0433255	514194/280705/504235/527023/521189/515361/508193/506059/515437/514547/282139/787967/512468/514159/525329/507107	16
bta00620	Pyruvate metabolism	14/1951	38/8735	0.0299677	0.0299677	0.0433442	533910/525155/540985/512571/767889/506459/282873/520260/508629/515338/513967/507817/525813/338471	14

## Sheet: SC vs. HC GO Terms (DMGs)
The significant GO terms among subclinical and healthy group
ONTOLOGY	ID	Description	GeneRatio	BgRatio	pvalue	p.adjust	qvalue	geneID	Count
CC	GO:0044459	plasma membrane part	169/1266	438/4725	1.02314e-08	1.02314e-08	3.51097e-06	282357/526133/511034/281614/281038/338037/282258/519014/281777/282113/281875/526088/281598/281753/507026/508767/281976/282248/539387/768006/513214/539491/527708/282452/504974/539462/510399/515161/282709/767922/282368/282356/281123/407209/281067/281052/282653/281601/528379/520189/281511/509790/281936/509969/282348/523784/100336102/282238/280834/615107/513990/511956/788252/504593/281973/281783/5406…	169
CC	GO:0098590	plasma membrane region	100/1266	262/4725	2.31857e-05	2.31857e-05	0.00397818	282357/511034/338037/519014/281777/282113/526088/281753/508767/281976/768006/504974/510399/282709/767922/282356/407209/281067/281052/282653/281601/528379/281511/509790/281936/509969/282348/100336102/282238/280834/788252/504593/281973/540657/509080/281276/614425/780973/282353/282134/280939/327662/281781/535127/519461/505797/537718/514742/281553/526585/613490/281950/281625/337925/508723/407230/2815…	100
CC	GO:0005887	integral component of plasma membrane	59/1266	142/4725	7.7992e-05	7.7992e-05	0.00892119	281614/281038/282258/282113/281875/526088/507026/282248/539387/527708/282452/539462/515161/282368/282356/281123/281067/281601/520189/509969/282348/523784/100336102/511956/281783/540657/516087/282353/616179/513316/541217/507459/281884/535990/538100/534816/505423/281880/281881/281346/281486/541597/281198/282346/338036/493993/515527/507339/530577/509933/282366/538730/281062/538496/281588/281345/2818…	59
CC	GO:0030054	cell junction	98/1266	265/4725	0.000118591	0.000118591	0.0101738	282357/511034/281777/282184/508268/286798/281875/534678/530941/286823/100141021/506291/539491/282031/521918/524973/525416/407996/281478/528379/281511/540892/281873/509790/617924/282857/282238/788252/617345/510738/327685/281783/540657/538745/511691/614425/780973/280939/513828/281781/514066/777787/537718/514742/613644/404089/524770/767615/613490/281950/506545/281509/540853/512659/541217/513094/2818…	98
CC	GO:0034702	ion channel complex	29/1266	59/4725	0.000186366	0.000186366	0.0127906	526133/526088/286823/527708/519085/281123/281067/282348/282238/281783/540657/780973/513316/785179/327667/281884/535990/538100/281880/281881/541597/281198/523515/530577/281696/538730/538496/282573/505563	29
CC	GO:0031226	intrinsic component of plasma membrane	62/1266	156/4725	0.000236101	0.000236101	0.0135033	281614/281038/282258/282113/281875/526088/507026/508767/282248/539387/527708/282452/539462/515161/282709/282368/282356/281123/281067/281601/520189/509969/282348/523784/100336102/511956/281783/540657/516087/282353/616179/513316/337925/541217/507459/281884/535990/538100/534816/505423/281880/281881/281346/281486/541597/281198/282346/338036/493993/515527/507339/530577/509933/282366/538730/281062/5384…	62
CC	GO:1902495	transmembrane transporter complex	30/1266	63/4725	0.000295622	0.000295622	0.0144921	526133/526088/286823/527708/515161/519085/281123/281067/282348/282238/281783/540657/780973/513316/785179/327667/281884/535990/538100/281880/281881/541597/281198/523515/530577/281696/538730/538496/282573/505563	30
CC	GO:1990351	transporter complex	30/1266	64/4725	0.000416187	0.000416187	0.0178272	526133/526088/286823/527708/515161/519085/281123/281067/282348/282238/281783/540657/780973/513316/785179/327667/281884/535990/538100/281880/281881/541597/281198/523515/530577/281696/538730/538496/282573/505563	30
CC	GO:0030425	dendrite	31/1266	68/4725	0.000612638	0.000612638	0.0178272	511034/281614/509823/407209/286852/281783/614425/527263/281958/767615/541217/513094/535990/533250/281881/282133/281662/511387/281198/282044/281792/515119/535321/522967/282173/281296/617293/506612/506107/505563/281204	31
CC	GO:0097447	dendritic tree	31/1266	68/4725	0.000612638	0.000612638	0.0178272	511034/281614/509823/407209/286852/281783/614425/527263/281958/767615/541217/513094/535990/533250/281881/282133/281662/511387/281198/282044/281792/515119/535321/522967/282173/281296/617293/506612/506107/505563/281204	31
CC	GO:0042175	nuclear outer membrane-endoplasmic reticulum membrane network	99/1266	279/4725	0.000620312	0.000620312	0.0178272	613886/510688/780785/539035/280872/615627/783831/536181/317654/282851/407225/767902/282299/510682/507346/527708/617707/281824/535344/281067/525416/509326/528204/506910/509969/515361/100336102/617419/532713/535227/514394/505233/614105/513010/767948/519613/286812/614217/614165/539993/616179/281153/616694/100125237/529761/506415/785179/282022/415113/535190/617336/768242/326580/535071/286771/538602/5…	99
CC	GO:0098827	endoplasmic reticulum subcompartment	97/1266	273/4725	0.000667839	0.000667839	0.0178272	613886/510688/780785/539035/280872/615627/783831/536181/317654/282851/407225/767902/282299/510682/507346/527708/617707/281824/535344/281067/525416/509326/528204/506910/509969/515361/100336102/617419/532713/535227/514394/505233/614105/513010/767948/519613/286812/614217/614165/539993/616179/281153/616694/100125237/529761/617543/506415/785179/282022/415113/535190/617336/768242/326580/535071/286771/5…	97
CC	GO:0031234	extrinsic component of cytoplasmic side of plasma membrane	9/1266	12/4725	0.000675357	0.000675357	0.0178272	526133/281203/540853/514423/541597/281201/282139/524215/338049	9
CC	GO:0005789	endoplasmic reticulum membrane	96/1266	272/4725	0.000918864	0.000918864	0.0208646	613886/510688/780785/539035/280872/615627/783831/536181/317654/282851/407225/767902/282299/510682/507346/527708/617707/281824/535344/281067/525416/509326/528204/506910/509969/515361/100336102/617419/532713/535227/514394/505233/614105/513010/767948/519613/286812/614217/614165/539993/616179/281153/616694/100125237/529761/506415/785179/282022/415113/535190/617336/768242/326580/535071/286771/538602/5…	96
CC	GO:0014069	postsynaptic density	18/1266	34/4725	0.00103425	0.00103425	0.0208646	511034/281601/528379/509969/614425/527263/537718/613490/541217/281881/541597/521864/282173/515556/281296/506612/538496/281204	18
CC	GO:0032279	asymmetric synapse	18/1266	34/4725	0.00103425	0.00103425	0.0208646	511034/281601/528379/509969/614425/527263/537718/613490/541217/281881/541597/521864/282173/515556/281296/506612/538496/281204	18
CC	GO:0044432	endoplasmic reticulum part	106/1266	306/4725	0.00107005	0.00107005	0.0208646	511603/613886/510688/780785/539035/280872/615627/783831/536181/317654/282851/407225/767902/282299/510682/507346/527708/617707/281824/535344/281067/525416/509326/528204/506910/415110/509969/515361/100336102/617419/532713/535227/514394/520650/505233/513167/614105/281036/513010/767948/519613/286812/614217/614165/539993/616179/281153/616694/100125237/529761/617543/506415/785179/282022/415113/535190/6…	106
CC	GO:0097458	neuron part	105/1266	303/4725	0.00111274	0.00111274	0.0208646	280722/511034/281614/281038/281777/539764/526088/534678/100141021/506291/281976/282030/317659/767922/509823/282368/532836/407209/282653/281601/528379/281511/540892/538603/509969/286852/282857/788252/618546/414274/281973/281783/511691/281276/614425/538474/527263/281958/777787/507648/537718/510998/534894/536359/767602/282656/767615/613490/281950/535421/282022/508723/407230/540853/541217/513094/5154…	105
CC	GO:0034705	potassium channel complex	11/1266	17/4725	0.00115523	0.00115523	0.0208646	526133/526088/281123/513316/281884/535990/281880/281881/541597/282573/505563	11
CC	GO:0005769	early endosome	35/1266	82/4725	0.00123649	0.00123649	0.0212156	280722/511034/539764/534678/614729/513214/282031/528076/541291/281067/613720/281276/507936/327662/507031/512029/539350/508872/529972/541217/513094/514423/515498/404121/404155/536810/281881/510164/521864/522967/526538/532573/614344/615849/511908	35
CC	GO:0044456	synapse part	62/1266	165/4725	0.00133152	0.00133152	0.0217581	511034/281038/539764/526088/534678/506291/282030/317659/509823/282368/281601/528379/281511/540892/509790/509969/286852/282857/282238/788252/618546/540657/511691/614425/780973/527263/537718/514742/767615/526585/613490/281950/287026/540853/541217/513094/515498/281971/281881/282133/541597/281198/282044/338036/510256/509076/521864/513947/281080/282173/515556/281296/523515/282177/317697/506612/520488/…	62
CC	GO:0009986	cell surface	40/1266	98/4725	0.00162534	0.00162534	0.0253522	280722/510688/286798/281598/286823/507026/281873/615107/513990/281783/281276/516087/280939/327662/280843/281781/281849/514742/613644/281862/282132/281530/281625/415113/535740/281876/281884/282346/618037/444867/282089/540048/280846/497017/532573/281062/507667/281874/282068/282573	40
CC	GO:0042995	cell projection	146/1266	446/4725	0.0020259	0.0020259	0.0298718	280722/511034/281614/281038/338037/519014/281777/613455/539764/504482/100126272/281573/536462/286823/100141021/281976/768006/534169/510399/509823/532836/407209/281478/281052/282653/281577/528379/281936/538603/282348/618379/286852/282857/280834/788252/504593/510738/281973/281783/511691/517994/789618/614425/282684/528315/538474/515437/280939/327662/281781/535127/527263/281958/777787/532686/510998/5…	146
CC	GO:0031984	organelle subcompartment	134/1266	406/4725	0.00219841	0.00219841	0.0298718	613886/510688/780785/539035/280872/615627/281134/783831/526526/536181/317654/282851/407225/767902/282299/510682/507346/527708/617707/513599/281824/535344/541291/281067/538919/525416/509326/528204/506910/520189/506903/511291/532778/509969/515361/282527/100336102/617419/532713/535227/514394/505233/614105/338077/513010/767948/282684/407768/281778/519613/286812/281781/614217/614165/539993/282853/6161…	134
CC	GO:0034703	cation channel complex	18/1266	36/4725	0.00241462	0.00241462	0.0298718	526133/526088/281123/282348/513316/785179/327667/281884/535990/538100/281880/281881/541597/530577/538730/538496/282573/505563	18
CC	GO:0044463	cell projection part	91/1266	263/4725	0.00248371	0.00248371	0.0298718	280722/511034/281614/281038/519014/281777/539764/281573/536462/281976/768006/534169/510399/509823/407209/281052/282653/282348/286852/282857/280834/788252/504593/281973/281783/511691/517994/614425/282684/281781/535127/527263/281958/532686/534894/536359/767602/282656/767615/509524/282022/508723/540853/541217/513094/281876/507845/281884/535990/281366/281057/768017/533250/281881/282133/281662/541597/…	91
CC	GO:0120038	plasma membrane bounded cell projection part	91/1266	263/4725	0.00248371	0.00248371	0.0298718	280722/511034/281614/281038/519014/281777/539764/281573/536462/281976/768006/534169/510399/509823/407209/281052/282653/282348/286852/282857/280834/788252/504593/281973/281783/511691/517994/614425/282684/281781/535127/527263/281958/532686/534894/536359/767602/282656/767615/509524/282022/508723/540853/541217/513094/281876/507845/281884/535990/281366/281057/768017/533250/281881/282133/281662/541597/…	91
CC	GO:0098797	plasma membrane protein complex	38/1266	94/4725	0.00258012	0.00258012	0.0298718	281614/281875/526088/281598/539491/282452/515161/281123/538745/281078/281203/529761/513316/327667/512659/281884/535990/281637/538100/281880/281881/281346/541597/281201/281198/493993/281080/507339/530577/509933/532573/538730/538496/281345/281874/282573/505563/515216	38
CC	GO:0098793	presynapse	36/1266	88/4725	0.00260301	0.00260301	0.0298718	281038/539764/526088/534678/506291/282030/317659/282368/528379/281511/540892/282857/788252/618546/511691/767615/281950/540853/541217/513094/515498/281971/281881/541597/282044/510256/509076/521864/513947/281080/317697/506612/520488/282325/281730/282573	36
CC	GO:0030658	transport vesicle membrane	23/1266	50/4725	0.0026115	0.0026115	0.0298718	281134/534678/282030/281511/540892/281878/282857/281078/505797/529761/513094/281071/280753/282044/510256/509076/281080/617294/533994/281070/317697/506612/281879	23
CC	GO:0008076	voltage-gated potassium channel complex	10/1266	16/4725	0.00285381	0.00285381	0.0315906	526088/281123/513316/281884/535990/281880/281881/541597/282573/505563	10
CC	GO:0036477	somatodendritic compartment	39/1266	98/4725	0.00317925	0.00317925	0.0340933	280722/511034/281614/509823/407209/286852/282857/281783/281276/614425/527263/281958/777787/767615/540853/541217/513094/535990/533250/281881/282133/281662/511387/281198/282044/281792/521864/515119/535321/522967/282173/281296/281492/617293/506612/506107/538496/505563/281204	39
CC	GO:0098984	neuron to neuron synapse	18/1266	37/4725	0.00354314	0.00354314	0.0350606	511034/281601/528379/509969/614425/527263/537718/613490/541217/281881/541597/521864/282173/515556/281296/506612/538496/281204	18
CC	GO:0120025	plasma membrane bounded cell projection	137/1266	421/4725	0.00356868	0.00356868	0.0350606	280722/511034/281614/281038/338037/519014/281777/613455/539764/504482/100126272/281573/536462/286823/100141021/281976/768006/534169/510399/509823/532836/407209/281052/282653/281577/528379/281936/538603/282348/618379/286852/282857/280834/788252/504593/510738/281973/281783/511691/517994/614425/282684/528315/538474/515437/280939/327662/281781/535127/527263/281958/532686/510998/534894/524770/536359/7…	137
CC	GO:0042734	presynaptic membrane	9/1266	14/4725	0.00357596	0.00357596	0.0350606	526088/281511/788252/281950/540853/281971/281881/281080/506612	9
CC	GO:0098862	cluster of actin-based cell projections	13/1266	24/4725	0.00398589	0.00398589	0.0377627	282357/616560/281052/282653/540892/281936/281781/510998/535421/530709/522967/337926/539635	13
CC	GO:0030863	cortical cytoskeleton	11/1266	19/4725	0.00407166	0.00407166	0.0377627	616560/282356/281577/281936/511956/780784/524770/281754/507845/532573/281062	11
CC	GO:0099572	postsynaptic specialization	18/1266	38/4725	0.00507511	0.00507511	0.0446729	511034/281601/528379/509969/614425/527263/537718/613490/541217/281881/541597/521864/282173/515556/281296/506612/538496/281204	18
CC	GO:0005938	cell cortex	25/1266	58/4725	0.00507709	0.00507709	0.0446729	616560/100126272/281753/282356/281790/281478/281577/281936/282857/511956/780784/524770/281754/281644/507845/286771/493717/522967/532851/281935/338049/281696/532573/281062/281730	25
CC	GO:0009898	cytoplasmic side of plasma membrane	10/1266	17/4725	0.00528035	0.00528035	0.0452998	526133/281203/540853/514423/541597/281201/282139/445543/524215/338049	10
CC	GO:0045202	synapse	75/1266	217/4725	0.00596568	0.00596568	0.049931	511034/281038/539764/526088/534678/100141021/506291/282030/317659/509823/282368/525416/281601/528379/281511/540892/509790/509969/286852/282857/282238/788252/618546/281783/540657/511691/614425/780973/527263/493722/537718/514742/767602/767615/526585/613490/281950/513128/287026/540853/541217/513094/515498/281971/281881/282133/541597/281198/282044/338036/510256/509076/521864/513947/281080/282173/5155…	75
MF	GO:0005543	phospholipid binding	43/1088	75/3851	9.64561e-08	9.64561e-08	3.79733e-05	519014/281573/513214/528055/538919/508836/407996/281478/497026/517259/617924/282857/327685/327662/512029/539350/281625/508157/529972/517231/511223/280787/287026/514423/404155/281637/281881/505009/282044/317656/282139/281935/317697/520488/613986/618684/518366/281345/614344/523124/530879/281627/507751	43
MF	GO:0046873	metal ion transmembrane transporter activity	33/1088	61/3851	1.68091e-05	1.68091e-05	0.00222798	526133/280705/526088/317654/282368/282653/282348/327685/282353/515437/281958/513316/337925/540853/281884/535990/538100/540925/281880/281881/541597/338036/615681/538479/327703/317697/282366/505064/281879/518117/615007/282573/505563	33
MF	GO:0035091	phosphatidylinositol binding	25/1088	42/3851	2.03638e-05	2.03638e-05	0.00222798	281573/513214/538919/508836/407996/281478/497026/512029/529972/517231/511223/287026/514423/404155/281637/281881/282139/281935/317697/613986/518366/281345/614344/530879/507751	25
MF	GO:0005244	voltage-gated ion channel activity	19/1088	29/3851	3.09312e-05	3.09312e-05	0.00222798	526133/526088/286823/282119/281958/513316/540853/281884/535990/538100/540925/281880/281881/541597/538479/281696/513545/282573/505563	19
MF	GO:0022832	voltage-gated channel activity	19/1088	29/3851	3.09312e-05	3.09312e-05	0.00222798	526133/526088/286823/282119/281958/513316/540853/281884/535990/538100/540925/281880/281881/541597/538479/281696/513545/282573/505563	19
MF	GO:0005509	calcium ion binding	76/1088	181/3851	3.39559e-05	3.39559e-05	0.00222798	534482/281038/616560/768324/504948/281573/505679/528055/534742/281478/615376/281511/497026/506348/509969/282857/327685/282662/281088/281036/281276/532684/327662/280843/535077/613991/505687/785916/281663/281154/524770/541281/281905/539277/281530/513316/508157/337925/282124/513870/282321/280787/287026/281985/505080/514695/281940/532663/534816/281914/281662/281486/514259/282044/529375/522269/282173/…	76
MF	GO:0022836	gated channel activity	30/1088	57/3851	8.07919e-05	8.07919e-05	0.00397581	526133/526088/286823/281067/282653/282348/281783/540657/282119/780973/281958/513316/540853/281884/535990/538100/540925/281880/281881/541597/281198/338036/538479/282177/317697/281696/281879/513545/282573/505563	30
MF	GO:0022839	ion gated channel activity	30/1088	57/3851	8.07919e-05	8.07919e-05	0.00397581	526133/526088/286823/281067/282653/282348/281783/540657/282119/780973/281958/513316/540853/281884/535990/538100/540925/281880/281881/541597/281198/338036/538479/282177/317697/281696/281879/513545/282573/505563	30
MF	GO:0005249	voltage-gated potassium channel activity	11/1088	14/3851	0.000132036	0.000132036	0.00577562	526133/526088/540853/281884/535990/281880/281881/541597/538479/282573/505563	11
MF	GO:0005216	ion channel activity	34/1088	70/3851	0.000219648	0.000219648	0.0086472	526133/526088/527708/281067/282653/282348/327685/281783/540657/282119/780973/281958/513316/540853/281884/535990/407151/538100/540925/281880/281881/541597/281198/338036/538479/327703/282177/317697/505064/281696/281879/513545/282573/505563	34
MF	GO:0022843	voltage-gated cation channel activity	12/1088	17/3851	0.000345194	0.000345194	0.0123543	526133/526088/281958/540853/281884/535990/281880/281881/541597/538479/282573/505563	12
MF	GO:1901981	phosphatidylinositol phosphate binding	16/1088	26/3851	0.00038865	0.00038865	0.0127505	281573/513214/538919/407996/281478/497026/517231/511223/287026/404155/281637/281881/282139/281935/281345/530879	16
MF	GO:0005261	cation channel activity	25/1088	49/3851	0.000587477	0.000587477	0.0177908	526133/526088/282653/282348/327685/281958/513316/540853/281884/535990/407151/538100/540925/281880/281881/541597/338036/538479/327703/282177/317697/505064/281879/282573/505563	25
MF	GO:0005267	potassium channel activity	13/1088	20/3851	0.000661264	0.000661264	0.018595	526133/526088/282653/513316/540853/281884/535990/281880/281881/541597/538479/282573/505563	13
MF	GO:0022838	substrate-specific channel activity	34/1088	75/3851	0.00107735	0.00107735	0.0282756	526133/526088/527708/281067/282653/282348/327685/281783/540657/282119/780973/281958/513316/540853/281884/535990/407151/538100/540925/281880/281881/541597/281198/338036/538479/327703/282177/317697/505064/281696/281879/513545/282573/505563	34
MF	GO:0005539	glycosaminoglycan binding	26/1088	55/3851	0.0019602	0.0019602	0.0482313	534482/281019/512072/280760/615107/327685/282662/281088/281717/280843/281154/541281/535192/281905/281530/407216/281625/505329/444867/282880/281006/280985/280846/515783/281572/282068	26

## Sheet: SC vs. HC GO Pathways (DMGs)
The significant pathways among subclinical and healthy group
ID	Description	GeneRatio	BgRatio	pvalue	p.adjust	qvalue	geneID	Count
bta04724	Glutamatergic synapse	59/1869	113/8735	4.24711e-13	4.24711e-13	7.15303e-11	533760/505740/525962/514554/282100/526088/532553/286850/539521/538360/541056/281790/281601/281878/537804/286852/618399/529618/282648/282353/536654/100295209/533527/615226/540485/534626/788151/508888/281203/535365/522866/282321/535603/287026/281985/281793/535017/529904/526363/281201/281199/614283/282136/281792/537698/282001/535158/535362/408013/317697/519904/326576/281879/526435/525482/282325/5313…	59
bta04728	Dopaminergic synapse	65/1869	134/8735	2.26222e-12	2.26222e-12	1.90503e-10	790875/505740/525962/537043/526088/538771/286850/539521/785086/281790/534129/525416/281878/537804/532713/286852/537631/618399/529618/282648/509290/530719/534125/513010/536654/617708/533527/508045/534626/338445/508888/281203/535365/533617/539277/617095/282410/287026/281985/281793/529904/281637/530705/513105/100137872/281201/533788/614283/618278/281792/520277/536561/535321/282001/505757/408013/3176…	65
bta04022	cGMP-PKG signaling pathway	73/1869	169/8735	1.10551e-10	1.10551e-10	6.20639e-09	505740/338037/534568/781956/537960/515161/100336730/533048/539521/785086/281790/534129/281601/538606/282641/281878/520448/282572/286852/533330/510434/512254/100271851/513010/282119/407140/536654/282134/327716/533527/504353/540307/788151/508888/539277/788119/617095/507041/337925/282321/535603/287026/281985/533378/535017/613600/407151/281918/281971/513105/100137872/282133/282146/281216/540568/54112…	73
bta04261	Adrenergic signaling in cardiomyocytes	66/1869	150/8735	3.36387e-10	3.36387e-10	1.41636e-08	505740/528014/537312/282161/317654/537960/515161/539521/785086/282608/281790/534129/525416/281601/282641/535383/532713/509290/530719/535277/513010/407140/536654/282134/497015/508045/504353/540307/788151/508888/533617/504408/539277/617095/337925/535603/287026/281985/327667/281793/535017/538100/513105/100137872/282146/533788/540568/520277/535321/521616/515621/282001/512313/327703/505757/519644/4080…	66
bta04010	MAPK signaling pathway	106/1869	292/8735	2.07228e-09	2.07228e-09	6.98032e-08	513673/505369/539334/540803/519251/282161/533908/286850/282031/281094/282608/536337/785655/282527/532393/519958/616115/286852/538751/537631/510434/282648/512254/616742/534125/507245/317696/527165/280939/533527/537380/517953/281855/100295732/281994/504408/533125/522866/507624/281995/282410/515640/281250/281251/282321/503620/613731/514886/327667/535622/617915/282140/533815/281637/525931/519269/6177…	106
bta04713	Circadian entrainment	48/1869	100/8735	2.69085e-09	2.69085e-09	7.55326e-08	505740/525962/526088/286850/539521/281790/525416/319095/281601/537804/532713/533330/618399/529618/530719/536654/534626/788151/508888/281203/535365/504408/539277/617095/535603/287026/281985/281793/535017/613600/529904/281201/614283/281216/281792/520277/100139857/282001/535158/408013/317697/281879/525482/282325/531391/282004/100125276/281204	48
bta04921	Oxytocin signaling pathway	64/1869	152/8735	5.42614e-09	5.42614e-09	1.30554e-07	505740/338037/526088/282161/538954/533048/539521/282608/281790/525416/281601/538606/281878/515421/532713/286852/327677/510434/530719/512254/536654/533527/100295732/788151/508888/539277/788119/522866/617095/282321/535603/287026/281985/327667/281793/533378/535017/613600/282023/511504/281216/509084/281792/541127/520277/100139857/521616/515621/282001/538479/327703/519644/408013/317697/338049/521196/2…	64
bta04730	Long-term depression	33/1869	60/8735	1.16831e-08	1.16831e-08	2.45959e-07	539521/281790/281878/533330/510434/529618/282648/536654/540485/534626/508888/522866/287026/281985/281793/534996/613600/614283/281216/281792/100139857/535321/282001/281716/281848/317697/521196/281879/282325/531391/515159/282004/524361	33
bta04611	Platelet activation	53/1869	121/8735	2.24152e-08	2.24152e-08	4.19467e-07	505740/338037/528478/510833/282031/286865/539521/281790/509326/281601/538606/281878/280958/533330/515515/536654/527263/788151/508888/526585/533125/522866/535603/282022/287026/281985/533670/281876/281793/533378/535017/534996/613600/534816/100137872/504531/286877/281216/510522/540310/520278/515621/514898/515011/282642/282307/513244/317697/338049/281879/525482/531391/282004	53
bta04928	Parathyroid hormone synthesis, secretion and action	46/1869	104/8735	1.32739e-07	1.32739e-07	2.2356e-06	281038/505740/514554/100124505/100336730/539521/785086/281790/534129/281601/281878/533656/513312/282484/512254/513010/536654/788151/508888/281915/535603/513836/784635/287026/281985/281793/540080/282886/535017/281637/513105/281914/282001/282880/317697/338049/521196/281879/513497/317779/281020/525482/282325/531391/515159/281768	46
bta04725	Cholinergic synapse	49/1869	114/8735	1.5532e-07	1.5532e-07	2.35596e-06	505740/525962/526088/286850/286865/539521/785086/281790/534129/525416/281601/281878/532713/618399/282648/530719/513010/536654/527263/788151/508888/281203/535365/282410/512311/535603/287026/281985/281884/535017/513105/100137872/504531/281201/281792/515621/282001/538479/282307/408013/317697/281879/281020/525482/282325/531391/100125276/281204/784876	49
bta04015	Rap1 signaling pathway	79/1869	216/8735	1.67862e-07	1.67862e-07	2.35596e-06	505740/528478/540803/281877/537312/505238/532839/532952/282031/532829/286865/281094/539521/281790/407996/281601/537804/535383/510434/617345/616742/317696/532605/527165/536654/280939/788151/508888/526585/539277/281530/617095/520454/538447/535603/513723/503620/613731/287026/281985/533670/281876/281793/617915/539687/535017/282140/525931/515187/100137872/539767/504531/286877/281792/520277/282001/5160…	79
bta04360	Axon guidance	68/1869	179/8735	2.37579e-07	2.37579e-07	3.07794e-06	534731/536815/513673/537951/790875/512018/282100/535137/407127/528655/286865/539521/540756/281790/525416/525767/407104/518168/539452/537455/508008/534164/532713/286852/613794/530719/616742/516019/527349/785942/533527/533746/527263/538797/407103/518458/788119/540876/282321/523720/282102/513432/539369/281876/540595/539687/506270/407151/519843/407770/504531/286877/286866/541127/282001/522767/615883/…	68
bta04270	Vascular smooth muscle contraction	54/1869	133/8735	3.53917e-07	3.53917e-07	4.13451e-06	505740/338037/534568/527140/614911/511890/533048/281601/281660/538606/281878/520448/515421/510434/407140/536654/282134/788151/508888/518542/539277/522866/617095/507041/281595/535603/287026/281985/505901/513753/281793/533378/535017/613600/281918/407218/514876/281216/520277/520278/282001/529760/408013/317697/338049/521196/281879/281137/525482/282325/531391/515159/282004/282573	54
bta05163	Human cytomegalovirus infection	86/1869	245/8735	3.87137e-07	3.87137e-07	4.13451e-06	790875/505740/525962/281875/507481/286850/507359/282330/286865/539521/785086/511754/281790/534129/528204/281601/281878/282527/510373/616115/286852/618399/510434/281036/513010/533661/541008/536654/533527/281855/788151/508888/281203/535365/539277/788119/617095/515640/281251/282321/535603/534712/287026/281985/281793/506270/535017/513105/513478/100137872/504531/281201/282023/507234/281792/541127/5202…	86
bta05412	Arrhythmogenic right ventricular cardiomyopathy (ARVC)	36/1869	76/8735	3.92778e-07	3.92778e-07	4.13451e-06	282564/281875/282161/282882/282608/281873/514031/506953/535399/517059/540307/527492/337925/506155/327667/281876/540568/521616/512313/327703/445543/515011/282642/506995/519644/408013/532127/514360/281062/508151/281128/538496/518117/540481/780777/536607	36
bta04971	Gastric acid secretion	35/1869	74/8735	5.94877e-07	5.94877e-07	5.89352e-06	505740/338037/317654/537960/515161/539521/281790/281067/525416/281601/281878/532713/530719/536654/788151/508888/539277/617095/535603/614308/287026/281985/281793/533378/535017/617196/282590/520277/521163/282001/317697/281879/525482/282325/784876	35
bta04072	Phospholipase D signaling pathway	59/1869	152/8735	6.39561e-07	6.39561e-07	5.89735e-06	505740/514554/540803/506607/537312/505238/532829/617707/286865/513389/537171/538360/541056/528204/281601/535383/506348/517887/510434/511691/508819/527165/541008/515515/527263/540485/507456/788151/508888/524734/526585/522866/535603/513723/782518/287026/281985/281793/535017/525931/519269/511887/100137872/506315/504531/540085/515621/282001/535298/282307/617172/535362/338049/521196/519904/525482/5313…	59
bta04925	Aldosterone synthesis and secretion	42/1869	96/8735	6.65295e-07	6.65295e-07	5.89735e-06	505740/537960/515161/533048/281824/785086/534129/525416/281601/282641/281878/532713/530719/281276/513010/536654/504353/788151/508888/539277/617095/507041/538447/535603/287026/281985/281793/539586/535017/281971/513105/282146/511504/282346/520277/282001/408013/613800/317697/281879/525482/282325	42
bta04726	Serotonergic synapse	48/1869	116/8735	8.12714e-07	8.12714e-07	6.84391e-06	280722/505740/525962/282100/526088/286850/539521/540416/281790/281878/535383/618399/282648/317708/540657/536654/617708/338445/404177/508888/281203/535365/522866/282410/282022/407230/287026/281985/281793/617674/281201/282023/281792/282001/282139/529593/408013/317697/521196/281879/282325/531391/616593/282471/408016/100125276/404074/281204	48
bta04720	Long-term potentiation	33/1869	69/8735	9.05493e-07	9.05493e-07	7.2621e-06	533908/282031/525416/281601/281878/537804/535383/532713/286852/510434/529618/530719/536654/533527/540485/517953/508888/539277/617095/282321/287026/281985/535017/614283/520277/282001/535158/317697/521196/281879/505453/282325/531391	33
bta04071	Sphingolipid signaling pathway	49/1869	120/8735	1.00193e-06	1.00193e-06	7.67027e-06	514554/616901/781956/286865/539521/281790/282527/510373/616115/537631/510434/505233/509290/534125/518021/539123/536654/540732/508045/614165/527263/537380/508888/533617/507041/287026/281985/100137872/282133/504531/286877/533788/535321/282001/282307/540994/505757/338049/521196/281020/281588/282325/531391/515159/533538/510620/524361/522515/539941	49
bta05032	Morphine addiction	40/1869	92/8735	1.48459e-06	1.48459e-06	1.08712e-05	505740/525962/524446/281969/526088/286850/100124505/539521/281790/281601/281970/282238/618399/282648/540657/780973/281958/788151/281203/535365/282410/535603/281793/535017/281637/281971/282133/281201/282136/281792/282001/529593/523515/506787/513785/525482/282325/281801/100125276/281204	40
bta04020	Calcium signaling pathway	72/1869	202/8735	1.79726e-06	1.79726e-06	1.26123e-05	338037/281969/282330/508394/528555/525416/281601/282641/281878/497026/281970/785655/532713/404136/286852/327677/282648/317708/530719/282119/527165/407140/541008/536654/282134/533527/540485/515732/504353/540307/788151/508888/526585/539277/615813/617095/337925/282410/281900/282321/535603/407230/287026/281985/281793/533378/535017/286771/534816/353113/282146/511504/540568/338036/520277/100139857/2820…	72
bta05017	Spinocerebellar ataxia	41/1869	96/8735	1.93338e-06	1.93338e-06	1.30249e-05	524142/539739/286865/281450/281878/537804/767990/767928/537631/529618/282648/534125/536654/100295209/537380/540485/534626/535597/508888/615488/287026/281985/517263/100137872/504531/614283/286866/540568/100139857/282001/512313/535158/528410/282307/317697/281879/539584/282325/518117/538467/539941	41
bta04750	Inflammatory mediator regulation of TRP channels	43/1869	103/8735	2.27445e-06	2.27445e-06	1.47333e-05	505740/539334/511890/286865/541151/525416/281601/281878/532713/537631/530719/534125/536654/788151/508888/518542/539277/522866/617095/507041/515640/281251/535603/407230/287026/281985/505901/281793/535017/504531/520277/617930/282001/516039/286883/507664/282307/317697/281879/525482/282325/616593/539941	43
bta04926	Relaxin signaling pathway	51/1869	130/8735	2.51879e-06	2.51879e-06	1.57117e-05	505740/525962/317711/510833/286850/286865/539521/785086/281790/534129/281601/616115/537631/618399/510434/534125/281870/513010/788151/508888/281203/535365/524734/535603/282191/287026/281985/281793/535017/281637/513105/281914/100137872/504531/286877/281201/281792/282089/282001/526469/535298/282307/535376/521196/281572/281137/525482/531391/100125276/539941/281204	51
bta04380	Osteoclast differentiation	52/1869	134/8735	2.94854e-06	2.94854e-06	1.735e-05	282258/510814/508890/286865/282229/782652/281094/511023/507859/282527/519958/616115/286852/537631/534125/512484/515515/533527/527263/508619/281855/509855/510008/515640/281250/281251/282321/509889/513836/327666/507100/100137872/534069/281346/504531/282089/286883/508367/282642/535298/282307/513244/535376/281993/511224/281345/531391/510393/281073/281854/539941/531389	52
bta04924	Renin secretion	33/1869	72/8735	2.98746e-06	2.98746e-06	1.735e-05	505740/281969/533048/539521/507504/281790/319095/282653/281878/281970/286852/533330/536654/533527/508888/539277/617095/282321/287026/281985/513753/281793/613600/282133/280909/281216/520277/509484/408013/317697/281879/281137/282573	33
bta04935	Growth hormone synthesis, secretion and action	47/1869	118/8735	3.78515e-06	3.78515e-06	2.125e-05	790875/505740/510814/286865/539521/785086/281790/281782/534129/281601/281878/537631/510434/534125/513010/536654/788151/508888/524734/535603/287026/281985/281793/281191/506270/535017/513105/100137872/504531/282001/526469/516039/508541/286883/535298/282307/523962/280805/408013/317697/521196/281879/505453/525482/282325/531391/539941	47
bta04024	cAMP signaling pathway	78/1869	229/8735	4.99038e-06	4.99038e-06	2.71124e-05	505740/514554/537312/317654/282031/282330/100124505/286865/537960/515161/533048/539521/785086/281790/281067/534129/525416/790124/319095/504216/281601/538606/282641/537804/535383/281992/532713/616115/537631/510434/529618/617345/317708/530719/534125/513010/100295209/534626/504353/788151/281553/526585/539277/617095/281172/281701/281900/535603/513753/281793/535017/529904/519269/513105/617701/10013787…	78
bta04727	GABAergic synapse	38/1869	91/8735	8.65253e-06	8.65253e-06	4.55396e-05	505740/525962/537873/523970/286850/539521/281790/281601/514339/523784/282238/618399/282648/540657/780973/788151/281203/535365/282410/535603/512459/535017/281201/281199/281792/282001/529593/523515/408013/616071/326576/407118/513785/525482/280969/282325/100125276/281204	38
bta04911	Insulin secretion	36/1869	85/8735	1.01377e-05	1.01377e-05	5.17396e-05	282357/505740/534568/537312/537960/515161/282356/785086/534129/525416/319095/281601/616576/520448/532713/530719/513010/536654/404177/788151/508888/535603/287026/281985/540853/281793/535017/535674/513105/538996/282001/408013/281879/525482/282325/282573	36
bta04922	Glucagon signaling pathway	41/1869	103/8735	1.57742e-05	1.57742e-05	7.60751e-05	282357/538954/282356/785086/534129/525416/616576/281878/281275/281992/532713/286852/338446/530719/513010/536654/533527/513483/514066/515732/508888/505472/539277/512571/617095/282321/287026/281985/507119/281793/539570/513105/100137872/515338/520277/281590/317697/281879/505453/404148/537256	41
bta04912	GnRH signaling pathway	38/1869	93/8735	1.58093e-05	1.58093e-05	7.60751e-05	505740/514554/525416/281601/281878/532713/537631/510434/530719/534125/541008/536654/788151/508888/539277/281915/522866/617095/535603/287026/281985/281793/535017/520277/282001/526469/516039/286883/535298/523962/408013/317697/521196/281879/525482/282325/531391/539941	38
bta04141	Protein processing in endoplasmic reticulum	59/1869	166/8735	1.66959e-05	1.66959e-05	7.81096e-05	538938/497024/510682/532645/415110/537631/520650/534125/407129/281036/507936/790870/282392/530189/539754/530858/530027/541040/537380/533949/614959/535820/415113/286770/534231/614128/535071/525222/404121/281546/281719/281662/520833/519058/524459/507541/511682/512757/613676/508519/512276/533994/511801/615778/511008/512530/507939/505064/540190/506107/615027/529312/281020/511649/507880/615007/533736/…	59
bta04721	Synaptic vesicle cycle	33/1869	78/8735	2.41301e-05	2.41301e-05	0.000109838	282368/518974/505224/281511/514339/523784/768228/282648/511691/539786/282353/530692/617708/281078/100337128/508327/282410/282378/540853/511839/282657/338089/513275/506315/338038/281080/286768/616071/407118/616684/282377/282471/515216	33
bta04916	Melanogenesis	40/1869	102/8735	3.00885e-05	3.00885e-05	0.000129976	790875/505740/505075/537330/539521/785086/281790/525416/281601/508008/532713/535399/510434/530719/513010/536654/788151/508888/539277/617095/535603/280761/287026/281985/281793/535017/513105/613288/281792/520277/282001/540753/521196/533782/281137/505453/525482/282325/531391/540481	40
bta00640	Propanoate metabolism	18/1869	33/8735	3.00976e-05	3.00976e-05	0.000129976	515902/533910/531552/281275/282150/536284/509983/614302/506459/282873/511082/511222/515338/281590/537713/280969/281748/537256	18
bta04625	C-type lectin receptor signaling pathway	41/1869	106/8735	3.51708e-05	3.51708e-05	0.000148088	525906/540803/510814/507481/286865/504282/281878/511023/616115/286852/537631/534125/789216/515515/533527/281855/539277/788119/509855/617095/281251/282321/519269/100137872/533216/504531/282023/541127/520277/531942/508367/282307/317697/338049/521196/281879/511224/531391/281073/281854/539941	41
bta04659	Th17 cell differentiation	43/1869	113/8735	3.63276e-05	3.63276e-05	0.000149228	539334/529631/510814/508890/507359/614367/281056/616115/286852/537631/534125/514529/512484/533527/508619/506053/281855/281862/535597/515125/515640/281251/282321/505901/281861/541127/282089/508541/538933/534280/535376/618722/282498/282491/506214/506141/511224/404154/617967/531391/281073/281854/539941	43
bta05165	Human papillomavirus infection	105/1869	345/8735	3.82478e-05	3.82478e-05	0.000153375	282564/790875/528478/280872/282258/511422/282194/317711/281875/505075/514561/282882/510814/507481/537330/536993/286865/281450/785086/511754/520030/534129/528204/518974/505224/280958/615414/281873/514031/511023/506953/282527/508008/616115/767928/510434/509290/281088/512484/513010/789216/282684/527165/515680/508045/540664/538619/529670/533949/281855/541281/533617/512571/509855/281530/508327/282191/…	105
bta04668	TNF signaling pathway	44/1869	118/8735	5.25752e-05	5.25752e-05	0.000205925	507481/286865/281094/785086/534129/540892/282527/519958/616115/537631/615107/534125/513010/789216/521987/537380/281855/504408/281915/541268/281251/535622/513105/281309/100137872/504531/282023/507234/444867/531942/526469/516039/286883/327712/508367/282307/506182/281137/531391/281073/408016/516353/281854/539941	44
bta04510	Focal adhesion	66/1869	198/8735	5.63147e-05	5.63147e-05	0.000215559	513673/282564/790875/338037/511422/282194/317711/281875/282882/282031/286865/281450/520030/768226/538606/280958/615414/616294/281873/514031/506953/537631/617345/534125/281088/527165/540664/527263/529670/524770/541281/524734/281530/520454/282191/503620/513432/281876/533378/506270/525931/615430/100137872/526409/281662/504531/529939/540310/522269/282001/515011/282642/506995/535298/282307/281848/5200…	66
bta05231	Choline metabolism in cancer	38/1869	99/8735	8.15342e-05	8.15342e-05	0.000304117	514554/100125779/504482/530146/507455/617707/286865/513389/537171/528204/511291/506348/537631/510434/534125/617624/508819/541266/527165/519461/526175/522866/512311/513723/525931/511887/100137872/504531/282001/404181/535298/282307/617172/521196/282325/531391/509613/539941	38
bta04934	Cushing syndrome	54/1869	156/8735	8.52653e-05	8.52653e-05	0.000304117	790875/505740/524446/505075/537330/540688/281010/282031/281824/539521/785086/511754/281790/521831/534129/525416/281601/281878/508008/532713/535399/510434/530719/281276/513010/536654/788151/508888/535603/534712/287026/281985/281793/535017/513105/613288/281880/282590/520260/282346/540753/281716/511619/506787/408013/317697/533782/281879/513497/541184/525482/504357/531391/540481	54
bta04961	Endocrine and other factor-regulated calcium reabsorption	23/1869	50/8735	8.70531e-05	8.70531e-05	0.000304117	537960/515161/282641/533656/511691/536654/281078/504353/540307/508888/337925/784635/287026/281985/281793/506315/282146/282001/281080/613800/525482/282325/515216	23
bta00534	Glycosaminoglycan biosynthesis - heparan sulfate / heparin	14/1869	24/8735	8.80775e-05	8.80775e-05	0.000304117	518563/511060/529260/538691/514172/540355/517768/538566/538602/281151/617069/521959/532099/286838	14
bta00620	Pyruvate metabolism	19/1869	38/8735	8.84791e-05	8.84791e-05	0.000304117	533910/281275/525155/540985/512571/767889/506459/282873/511082/512723/520260/508629/515338/281590/513967/507817/509274/525813/537256	19
bta04066	HIF-1 signaling pathway	41/1869	110/8735	9.44943e-05	9.44943e-05	0.000318297	280705/528655/281010/507359/286865/282356/525416/281275/532713/616115/510434/530719/280939/508619/503620/407183/535219/507119/617915/282140/100137872/504531/282001/508541/404181/282307/281848/535578/513497/281572/281137/281020/505453/282325/531391/282141/509613/534075/614824/280817/537256	41
bta04514	Cell adhesion molecules (CAMs)	54/1869	158/8735	0.000124998	0.000124998	0.000412791	530042/538846/281614/282184/508268/281877/618198/281875/282882/281050/507026/781106/539387/539462/281258/531178/512072/534500/525767/514031/282662/281840/527275/533834/404089/614412/281950/523720/506545/281876/615785/281941/529873/533492/407152/281486/617434/281196/540576/281063/539607/512975/282303/512405/532127/618722/282498/282491/506214/281062/281874/514998/537808/513412	54
bta04012	ErbB signaling pathway	33/1869	84/8735	0.00013994	0.00013994	0.000453248	525906/513673/790875/286865/525416/785655/532713/538751/537631/280737/510434/530719/534125/524734/540876/513432/506270/100137872/504531/540085/282001/526469/404181/535298/282307/521196/513497/282325/531391/281361/509613/539977/539941	33
bta04014	Ras signaling pathway	76/1869	242/8735	0.000149133	0.000149133	0.000473907	513673/525962/514554/540803/281148/539764/505238/614911/286850/282031/286865/281094/537804/532393/616115/537631/618399/510434/616742/534125/317696/527165/280939/281855/281203/535365/524734/539277/533125/522866/617095/540876/513723/503620/613731/514886/513432/617915/282152/282140/525931/519269/617701/100137872/539767/522344/504531/281201/540085/617325/518844/520277/529375/282001/280877/535298/2823…	76
bta04972	Pancreatic secretion	38/1869	102/8735	0.000170036	0.000170036	0.000524454	505740/282100/523291/317654/614911/282031/537960/515161/507504/281067/281601/282641/281878/327677/100139105/536654/504353/788151/508888/535603/508222/287026/281985/281793/535017/282146/540568/282001/512313/613800/317697/338049/281879/525482/282325/518117/282573/784876	38
bta05418	Fluid shear stress and atherosclerosis	50/1869	145/8735	0.000171267	0.000171267	0.000524454	617236/281875/281598/407127/497024/507346/505940/538954/286865/281557/282527/616115/537631/512254/534125/280950/537380/281855/100295732/539277/407216/617095/515640/281250/281251/506270/615785/100137872/281346/504531/286877/520277/519632/526469/286883/515011/282642/282303/282307/338049/282131/281572/281805/281137/281020/281345/281073/505642/281854/539941	50
bta04070	Phosphatidylinositol signaling system	37/1869	99/8735	0.000191151	0.000191151	0.000564804	282087/286865/507329/513389/537171/281878/497026/513301/506348/508819/535844/508888/539277/615813/617095/287026/281985/533289/536810/511887/504531/282309/520277/282001/282307/518488/317697/530577/508236/281879/511124/282325/515135/519037/615135/507860/513986	37
bta05414	Dilated cardiomyopathy (DCM)	37/1869	99/8735	0.000191151	0.000191151	0.000564804	282564/505740/281875/282161/282882/282608/281601/281873/514031/506953/517059/535277/497015/540307/788151/337925/535603/506155/327667/281876/281793/535017/534069/540568/282089/521616/512313/327703/515011/282642/506995/519644/408013/532127/538496/525482/518117	37
bta04310	Wnt signaling pathway	54/1869	161/8735	0.000216612	0.000216612	0.000629001	790875/539639/505075/537330/513056/511675/525416/520189/785152/615414/508008/532713/535399/286852/537631/530719/534125/282684/785924/529698/533527/540179/508888/513742/788119/282321/287026/281985/536121/505423/286794/613288/618428/618586/541127/282001/507204/282880/784035/281386/540753/511619/338049/533782/353106/511224/505453/282325/504357/540481/281730/282068/539941/531389	54
bta05031	Amphetamine addiction	28/1869	69/8735	0.000231457	0.000231457	0.000660715	505740/785086/534129/525416/537804/532713/286852/529618/530719/513010/617708/100295209/533527/534626/338445/539277/617095/282321/281793/529904/513105/614283/520277/282001/535158/408013/282325/282471	28
bta04660	T cell receptor signaling pathway	39/1869	107/8735	0.000239011	0.000239011	0.0006659	525906/513673/790875/281050/507026/508890/286865/281056/522346/616115/286852/537631/510434/617345/534125/533527/527263/281855/533125/282321/513432/505901/535622/100137872/407152/504531/541127/508367/535298/282307/513244/338049/521196/511224/515377/531391/281073/281854/539941	39
bta04970	Salivary secretion	35/1869	93/8735	0.000241181	0.000241181	0.0006659	505740/317654/537960/515161/281601/614878/282641/281878/533330/327677/407140/536654/282134/504353/788151/508888/539277/617095/535603/287026/281985/281793/535017/613600/282146/281216/520277/282001/613800/317697/281879/525482/282325/282004/282573	35
bta05212	Pancreatic cancer	30/1869	76/8735	0.00025105	0.00025105	0.00068197	514554/505238/510814/286865/511754/616115/537631/534125/533823/281855/515125/513723/534712/282152/100137872/534069/504531/282089/508541/404181/282307/535376/521196/513497/281572/541184/531391/281073/281854/539941	30
bta04371	Apelin signaling pathway	48/1869	140/8735	0.000267071	0.000267071	0.000701309	505740/338037/525962/540803/317654/286850/538954/100336730/539521/281790/509232/281601/281878/338446/618399/510434/512254/100271851/536654/540307/788151/508888/281203/535365/515125/539277/617095/507041/337925/535603/287026/281985/533378/535017/519269/100137872/281201/520277/100139857/515621/404181/317697/521196/281879/525482/531391/100125276/281204	48
bta04151	PI3K-Akt signaling pathway	108/1869	373/8735	0.00026954	0.00026954	0.000701309	282564/790875/525962/282258/511422/282194/317711/281875/282882/286850/507359/532829/538954/286865/281094/281450/785086/511754/520030/534129/528204/280958/615414/281873/514031/785655/506953/532393/616115/538751/618399/510434/509290/616742/281088/509080/281144/513010/317696/527165/515515/280939/508045/540664/529670/535530/281855/281862/541281/281203/535365/533617/526585/281530/507390/282191/503620/…	108
bta04540	Gap junction	34/1869	90/8735	0.000270662	0.000270662	0.000701309	505740/535605/539521/281790/281601/281878/533330/510434/527165/536654/540485/100295732/788151/508888/535603/407230/287026/281985/281793/535017/613600/525931/281216/282001/523542/535298/317697/521196/281879/534206/525482/282325/531391/282004	34
bta04722	Neurotrophin signaling pathway	43/1869	122/8735	0.000277398	0.000277398	0.000707874	790875/533908/282031/286865/525416/532393/532713/616115/537631/510434/530719/534125/504668/535530/537380/517953/512562/100295732/524734/504408/539277/617095/520454/540876/617701/100137872/282010/504531/540085/614726/520277/534170/535298/282307/523962/539126/338049/521196/515034/281020/531391/281854/539941	43
bta04142	Lysosome	43/1869	123/8735	0.000339772	0.000339772	0.000837763	531327/512361/282470/518974/521189/512444/509610/281909/533177/504310/282272/281078/530164/281849/529148/536359/767602/538401/504468/511839/282657/404155/338038/529923/515809/513067/281080/286768/613527/789125/281281/784163/507188/536435/286772/508713/520564/504799/768053/100125267/510620/509427/281433	43
bta04152	AMPK signaling pathway	43/1869	123/8735	0.000339772	0.000339772	0.000837763	511451/538954/286865/785086/281067/534129/528204/281052/617419/338446/282704/509290/513010/282134/508045/513483/514066/535530/533617/407183/507119/509200/513105/100137872/287019/504531/533788/407235/509084/515338/535321/281590/507056/404181/515024/282307/281848/505757/281993/521730/280924/524361/509613	43
bta05215	Prostate cancer	36/1869	98/8735	0.000343221	0.000343221	0.000837763	790875/535231/541166/511037/286865/787068/785086/534129/535399/616115/510434/513010/527165/281855/527024/534712/535183/525931/513105/281309/100137872/504531/535298/282307/281848/521196/513497/541184/281020/505453/531391/540481/281073/404193/281768/281854	36
bta04918	Thyroid hormone synthesis	29/1869	74/8735	0.000365536	0.000365536	0.000879486	505740/537960/515161/785086/534129/281601/415110/281878/407129/513010/536654/788151/508888/281553/535603/415113/287026/281985/281793/280706/535017/513105/282001/531519/317697/281879/525482/282325/506406	29
bta05145	Toxoplasmosis	40/1869	113/8735	0.000403428	0.000403428	0.000956984	510814/507481/539521/281790/520030/282527/519958/616115/537631/534125/512484/281276/529670/508619/281855/281876/282152/513478/100137872/534069/529939/281792/282089/515621/516039/508541/286883/497017/540190/618722/282498/282491/506214/281020/531391/281073/408016/281854/539941/404074	40
bta05030	Cocaine addiction	21/1869	48/8735	0.000412379	0.000412379	0.00096463	505740/539521/785086/541056/281790/534129/537804/616115/513010/617708/100295209/338445/281793/513105/617701/614283/282173/281453/535158/519904/282471	21
bta04062	Chemokine signaling pathway	60/1869	188/8735	0.00045039	0.00045039	0.00102664	790875/505740/525962/281802/510814/286850/282031/286865/539521/281790/509821/281601/511023/616115/615107/513990/618399/617345/541008/535530/281855/788151/508888/281203/535365/524734/535603/287026/281985/280814/506270/535017/534996/281637/100137872/504531/286877/281201/282136/536561/515621/508541/327712/510668/535298/282307/338049/521196/497017/530951/525482/282325/281345/531391/508387/281073/2818…	60
bta04923	Regulation of lipolysis in adipocytes	24/1869	58/8735	0.000451082	0.000451082	0.00102664	505740/282330/286865/533048/539521/281790/504216/281601/533330/788151/281553/535603/282022/281793/535017/100137872/282133/504531/282023/282307/505290/535588/525482/282004	24
bta04927	Cortisol synthesis and secretion	26/1869	65/8735	0.000499395	0.000499395	0.00110669	505740/540688/281824/785086/534129/281601/281878/281276/513010/536654/788151/508888/535603/287026/281985/281793/535017/513105/281880/282590/282346/506787/408013/317697/281879/525482	26
bta04929	GnRH secretion	26/1869	65/8735	0.000499395	0.000499395	0.00110669	282100/526088/286865/281878/510434/536654/407103/404177/508888/281146/282102/287026/281985/281637/100137872/504531/282001/538255/282307/408013/317697/521196/281879/513785/282325/531391	26
bta04919	Thyroid hormone signaling pathway	41/1869	118/8735	0.000533567	0.000533567	0.00116706	790875/538979/281875/317654/510814/286865/537960/515161/282356/528204/497026/518047/510434/327716/541240/535872/520974/508888/407216/525389/534649/287026/281985/100137872/287019/504531/517336/540568/282001/507663/532621/512313/282642/282307/521196/525636/505453/282325/518117/531391/519037	41
bta04723	Retrograde endocannabinoid signaling	50/1869	152/8735	0.000607833	0.000607833	0.00131246	505740/525962/526088/286850/539521/281790/541291/281601/281878/404188/327670/282238/537631/618399/529618/282648/540657/534125/780973/536654/540485/534626/788151/508888/281203/535365/282410/535603/287026/281985/535017/529904/287327/281201/282023/614283/281792/282001/529593/523515/408013/505290/317697/281879/525482/282325/531391/100125276/539941/281204	50
bta04930	Type II diabetes mellitus	20/1869	46/8735	0.00062082	0.00062082	0.00132353	282357/286865/616576/537631/282648/534125/512571/507041/282410/538996/353113/504531/286877/282307/408013/531391/281854/614824/280817/539941	20
bta04144	Endocytosis	74/1869	245/8735	0.000660344	0.000660344	0.0013811	525906/506187/514554/528478/281802/539764/538771/338052/614576/540304/511199/523797/317659/514465/281577/511918/532778/613720/517887/506374/507199/511691/281276/508819/317696/512450/281078/506430/281849/520739/510489/281862/505206/512029/515125/523736/511223/281861/514423/616164/539295/539687/327705/513789/281022/507572/281637/506315/286877/282136/535566/521864/538348/281080/505336/510596/1001385…	74
bta05167	Kaposi sarcoma-associated herpesvirus infection	64/1869	206/8735	0.000664223	0.000664223	0.0013811	790875/525962/282258/510814/507481/286850/286865/511754/281878/511023/282527/510373/616115/286852/537631/618399/510434/534125/512484/515515/533527/508619/281855/281203/535365/539277/788119/509855/617095/282321/534712/280814/534996/100137872/533216/504531/281201/282023/541127/520277/515621/526469/508541/286883/282307/506182/317697/521196/497017/533051/281879/513497/281572/541184/511224/505453/5313…	64
bta00230	Purine metabolism	45/1869	134/8735	0.000681731	0.000681731	0.00140022	505740/511200/524446/281969/281976/280716/100124505/517063/534402/533048/524973/281601/281970/282244/506980/530642/281973/768044/528311/781227/788151/512571/615606/280960/535603/508167/100126045/614149/613653/535017/613600/281971/534611/281216/506787/511269/692183/533000/538583/525482/536409/282223/281951/783572/521103	45
bta04915	Estrogen signaling pathway	46/1869	138/8735	0.000716964	0.000716964	0.00145484	505740/526088/286865/539521/785086/281790/534129/281601/281878/510434/513010/536654/540485/281958/788151/508888/524734/281146/539277/617095/535603/287026/281985/281793/535017/100848466/513105/100137872/504531/281792/520277/534280/788424/788909/511540/510914/535298/282307/317697/521196/540190/281879/513785/281020/525482/531391	46
bta05166	Human T-cell leukemia virus 1 infection	71/1869	234/8735	0.000731733	0.000731733	0.00146713	505740/281877/281148/508890/286865/515376/282356/785086/534129/281601/506740/615414/282527/281033/616115/286852/537631/286872/510434/510465/534125/407129/281036/513010/282119/533527/281855/281862/788151/515125/788119/515640/282321/535603/534712/539369/281861/282152/535017/513105/507100/286794/100137872/534069/504531/541127/282089/526469/508367/282307/523962/540230/535376/618722/282498/282491/5134…	71
bta04520	Adherens junction	27/1869	70/8735	0.00077025	0.00077025	0.00152619	504482/507718/512072/281577/505696/535399/536759/280977/527263/524770/515125/527492/533492/515187/522269/507204/507837/281848/535376/338049/507632/505453/531391/540481/504625/281768/780777	27
bta01200	Carbon metabolism	39/1869	113/8735	0.00083662	0.00083662	0.00161959	515902/286840/505103/509481/534599/533910/616576/280976/280682/507688/533044/513483/514066/540985/781227/512571/613376/509983/614302/506459/282873/507119/511082/512723/531682/520260/511222/618400/282446/537713/507817/533630/404148/281206/281748/614824/280817/281785/525813	39
bta04670	Leukocyte transendothelial migration	39/1869	113/8735	0.00083662	0.00083662	0.00161959	538846/282184/508268/281877/537312/282882/282031/286865/281258/539521/281790/535383/507859/617345/541008/404089/524770/527492/506545/281876/506270/515187/539767/281346/504531/540310/522269/282001/512975/282303/282307/512405/338049/282325/281345/281874/514998/780777/513412	39
bta04218	Cellular senescence	53/1869	166/8735	0.000933996	0.000933996	0.00178755	540803/286865/512233/511754/510158/528204/281878/615414/616115/286852/100139053/510434/282119/327716/533527/535530/515125/539277/788119/617095/281250/282321/534712/524870/510420/525093/519269/538866/100137872/539767/534069/281662/504531/541127/520277/533294/282089/282860/516039/286883/282307/408013/535376/317697/521196/281879/513497/541184/511224/531391/509613/536656/540313	53
bta05410	Hypertrophic cardiomyopathy (HCM)	33/1869	92/8735	0.000965108	0.000965108	0.00182634	282564/281875/282161/282882/538954/282608/281873/514031/506953/517059/535277/497015/540307/337925/506155/327667/281876/534069/540568/282089/521616/512313/327703/515011/282642/509484/506995/519644/408013/532127/281137/538496/518117	33
bta05211	Renal cell carcinoma	27/1869	71/8735	0.000993561	0.000993561	0.0018593	513673/281010/282031/286865/282356/510434/520454/282711/513432/535219/100137872/534069/520260/504531/540085/282089/535298/282307/533445/535578/521196/513497/281572/505453/531391/534075/540313	27
bta05221	Acute myeloid leukemia	26/1869	68/8735	0.00111435	0.00111435	0.00206242	529631/286865/535399/616115/510434/281855/538628/534401/507100/100137872/504531/508541/511206/404181/534280/445543/535298/282307/100138545/521196/353106/531391/540481/281073/509613/281854	26
bta04666	Fc gamma R-mediated phagocytosis	33/1869	93/8735	0.00119423	0.00119423	0.00218623	514554/504482/614576/523797/617707/286865/507329/282229/281478/617345/511691/508819/515515/535077/522866/507041/280814/327705/534996/100137872/407152/504531/282001/404181/282307/617172/281935/521196/282325/281345/531391/535225/508402	33
bta04810	Regulation of actin cytoskeleton	64/1869	211/8735	0.00131792	0.00131792	0.00238672	513673/282564/338037/540803/281877/504482/281875/537711/317654/100141021/282882/286850/286865/787068/281478/281577/538606/513641/281873/514031/506953/510434/617345/518833/508819/317696/527165/512950/535077/533823/100124501/524770/526585/525628/613731/524352/513432/533289/281876/533378/506270/525931/519269/504531/540310/522269/513895/515011/282642/507837/506995/282307/533929/532127/338049/521196/5…	64
bta01521	EGFR tyrosine kinase inhibitor resistance	29/1869	80/8735	0.00158582	0.00158582	0.00284133	790875/507359/286865/785655/510434/527165/535530/524734/507390/282152/525931/100137872/504531/540085/282001/508541/404181/280877/535298/282307/281848/521196/281572/281020/282325/531391/404193/281361/509613	29
bta05230	Central carbon metabolism in cancer	25/1869	66/8735	0.00160816	0.00160816	0.00285103	282357/528655/286865/282356/616576/281275/510434/527165/512571/614027/507119/100137872/504531/282369/282307/539126/521196/531391/404193/404148/281768/515924/614824/280817/537256	25
bta01040	Biosynthesis of unsaturated fatty acids	14/1869	30/8735	0.00176998	0.00176998	0.00310523	613886/508918/617419/533333/493643/614105/532015/100125237/789567/514788/617293/615756/280924/521822	14
bta05160	Hepatitis C	51/1869	164/8735	0.00218544	0.00218544	0.00379458	790875/280872/282258/282184/508268/510814/507481/286865/511754/511023/537782/282527/510373/281992/616115/615107/510434/509290/512484/281276/508045/281855/404089/509231/509855/535820/506415/534712/506545/100137872/533216/504531/282346/654488/519922/535321/508541/512975/535298/282307/512405/506182/521196/513497/541184/531391/514998/281073/408016/524361/281854	51
bta05135	Yersinia infection	42/1869	130/8735	0.00235591	0.00235591	0.00404883	790875/504482/282882/540304/508890/533908/286865/616545/281577/281873/519958/616115/537631/510434/617345/534125/509080/508819/541008/517953/281855/281251/524352/281876/506270/281249/100137872/504531/541127/526469/516039/286883/507837/282307/513244/338049/511224/531391/535225/281073/281854/539941	42
bta05142	Chagas disease (American trypanosomiasis)	38/1869	115/8735	0.002385	0.002385	0.00405741	507481/286865/281056/539521/281790/281601/282527/616115/537631/509290/534125/281036/536654/508045/508619/281855/508888/281251/287026/281985/281793/100137872/534069/504531/281792/282089/535321/526469/327712/509484/282307/535376/100124520/531391/281073/524361/281854/539941	38
bta05235	PD-L1 expression and PD-1 checkpoint pathway in cancer	32/1869	93/8735	0.00248843	0.00248843	0.00419104	510814/281050/508890/286865/281056/616115/286852/510434/533834/533527/508619/281855/539350/533125/617628/282321/505901/100137872/504531/535008/541127/516039/508541/286883/404181/282307/521196/511224/531391/281073/281854/522469	32
bta04973	Carbohydrate digestion and absorption	18/1869	44/8735	0.00263722	0.00263722	0.00439766	282357/504366/514332/529847/286865/537960/515161/508888/287026/281985/100137872/504531/282361/282307/408013/282325/614824/280817	18
bta04211	Longevity regulating pathway	31/1869	90/8735	0.00283084	0.00283084	0.00467424	505740/538954/286865/785086/534129/528204/281601/616115/338446/513010/535530/532686/788151/535603/528606/784635/535017/513105/531682/100137872/504531/407235/509084/507056/404181/282307/281848/281993/514062/525482/509613	31
bta01212	Fatty acid metabolism	22/1869	58/8735	0.00293534	0.00293534	0.00479973	613886/614508/508918/617419/533333/493643/614105/532015/100125237/789567/511082/511222/509209/281590/282130/617293/615756/280924/281748/514159/537161/521822	22
bta05161	Hepatitis B	52/1869	171/8735	0.00336388	0.00336388	0.00544758	510814/515988/507481/286865/785086/534129/511023/537782/510373/519958/616115/537631/510434/534125/512484/513010/541008/281855/510093/539350/515125/788119/534712/513105/100137872/534069/533216/504531/541127/282089/282001/526469/516039/508541/286883/535298/282307/523962/506182/535376/521196/513497/541184/511224/281020/505453/282325/531391/281073/408016/281854/539941	52
bta00514	Other types of O-glycan biosynthesis	18/1869	45/8735	0.00353073	0.00353073	0.00566332	533703/282073/618078/444859/539417/506903/617596/513167/508488/281781/526331/540500/493992/614203/789150/504951/505622/616218	18
bta04933	AGE-RAGE signaling pathway in diabetic complications	34/1869	103/8735	0.0040034	0.0040034	0.00636092	317711/510833/510814/286865/616115/537631/534125/508888/515125/507041/281250/281251/282191/287026/281985/100137872/534069/504531/286877/282089/282001/508541/282307/535376/281572/281137/511224/281020/282325/531391/519037/408016/539941/378474	34
bta05321	Inflammatory bowel disease (IBD)	25/1869	70/8735	0.00406438	0.00406438	0.00639745	510814/515988/282452/614367/616115/508619/506053/281862/535597/515125/281250/281251/281249/534069/444867/282089/508541/538933/618722/282498/282491/506214/511224/404154/617967	25
bta00270	Cysteine and methionine metabolism	19/1869	49/8735	0.00416106	0.00416106	0.00648899	514525/505103/505511/532836/280946/281275/525563/533044/514462/497025/359716/528582/525059/508345/281643/521553/512468/281206/537256	19
bta00561	Glycerolipid metabolism	24/1869	67/8735	0.0046172	0.0046172	0.00713425	506607/407225/617707/513389/537171/514693/525193/506348/280843/507456/535192/537224/526739/282609/407226/614494/511887/508629/513967/617172/505290/529067/497202/530414	24
bta04512	ECM-receptor interaction	30/1869	89/8735	0.00471346	0.00471346	0.00715177	282564/282661/511422/282194/317711/281875/282882/281450/520030/281052/280958/281873/514031/506953/281088/540664/529670/538430/541281/281530/282191/281876/281057/526409/529939/515011/282642/506995/527014/532127	30
bta05210	Colorectal cancer	30/1869	89/8735	0.00471346	0.00471346	0.00715177	790875/505238/286865/535399/538751/537631/510434/534125/515125/533115/507390/513723/100137872/534069/504531/282089/404181/535298/511619/282307/535376/338049/521196/513497/281020/504357/531391/540481/408016/539941	30
bta04913	Ovarian steroidogenesis	21/1869	57/8735	0.00538237	0.00538237	0.00809379	505740/505212/281824/281601/281276/353351/788151/281740/522866/281172/511470/281900/535603/281793/535017/282023/282346/515710/281848/525482/404074	21
bta04390	Hippo signaling pathway	46/1869	152/8735	0.00616514	0.00616514	0.00911009	790875/528478/614786/281877/510255/407127/505075/537330/536993/788948/615414/508008/535399/538751/509290/508045/530910/515125/519937/516557/407216/527492/540595/539687/533815/407175/613288/534069/520406/286877/540488/505059/282089/535321/540753/523542/511619/535376/533782/617525/535916/504357/540481/524361/535699/780777	46
bta04658	Th1 and Th2 cell differentiation	32/1869	98/8735	0.00616639	0.00616639	0.00911009	617389/510814/515988/508890/282452/281056/616115/286852/767928/537631/534125/512484/533527/508619/281855/281862/282321/505901/281861/521194/541127/538933/618722/282498/282491/506214/511224/404154/531391/281073/281854/539941	32
bta04621	NOD-like receptor signaling pathway	54/1869	184/8735	0.006403	0.006403	0.00937739	281038/282258/510814/507481/506790/520472/540892/281878/511023/281557/519958/616115/510080/537631/534125/509080/512484/282119/533661/280950/532686/281855/508888/509855/616010/281251/287026/281985/504400/282152/513939/281249/533216/534574/507234/654488/519922/444867/522018/327712/507664/509111/513924/506182/317697/338049/281879/281020/531391/281073/281854/536656/539941/528169	54
bta04910	Insulin signaling pathway	42/1869	137/8735	0.00674526	0.00674526	0.00973413	525906/790875/528478/538954/286865/512072/528204/616576/338446/537631/510434/534125/513483/514066/515732/505472/524734/539277/617095/520454/100139988/100137872/504531/286877/515338/520277/281590/507056/404181/615679/535298/282307/100139910/521196/532573/531391/504625/509613/281854/614824/280817/539941	42
bta00730	Thiamine metabolism	9/1869	18/8735	0.00676218	0.00676218	0.00973413	280994/280716/517063/788066/280977/282090/615606/511269/521103	9
bta00280	Valine, leucine and isoleucine degradation	19/1869	51/8735	0.0069022	0.0069022	0.00985148	515902/338074/531699/317658/512002/533910/282150/614302/511082/508629/511222/509209/281643/513967/535804/407767/521553/280969/281748	19
bta00562	Inositol phosphate metabolism	25/1869	73/8735	0.00751423	0.00751423	0.0106349	282087/507329/497026/513301/508819/534118/535844/508888/615813/523736/287026/281985/533289/536810/504531/282309/518488/530577/511124/515135/519037/615135/541067/507860/513986	25
bta05170	Human immunodeficiency virus 1 infection	66/1869	234/8735	0.0075905	0.0075905	0.0106533	513673/525962/507481/286850/286865/281056/539521/281790/281878/282527/510373/519958/616115/286852/537631/618399/510434/504310/534125/281036/533661/541008/536654/533527/281855/281203/535365/539277/788119/617095/282321/513432/524683/282152/506270/540322/100137872/504531/281201/507234/281792/541127/520277/282001/516039/286883/404181/282307/317697/521196/497017/281586/504335/281879/511224/281020/2823…	66
bta04978	Mineral absorption	20/1869	55/8735	0.00769336	0.00769336	0.0107085	505569/280705/527023/534257/537960/515161/504616/614878/282641/521189/533656/282484/518976/504353/540307/337925/282146/282361/613800/510243	20
bta00601	Glycosphingolipid biosynthesis - lacto and neolacto series	12/1869	29/8735	0.0118826	0.0118826	0.0164039	767899/511328/444859/784997/338077/281781/282853/515340/515585/281780/281483/404163	12
bta04931	Insulin resistance	34/1869	110/8735	0.0121451	0.0121451	0.0166301	282357/790875/533908/538954/286865/512072/282356/785086/534129/281052/282527/281992/616115/338446/537631/534125/513010/517953/505472/507041/534649/505901/513105/100137872/504531/286877/783217/515338/508541/404181/282307/282325/281854/539941	34
bta05152	Tuberculosis	56/1869	198/8735	0.0124338	0.0124338	0.016888	281877/539764/317777/510814/507481/282229/782652/504282/534003/525416/518974/533656/537782/282527/510373/532713/616115/286852/537631/530719/534125/515515/533527/508619/529148/539277/617095/281250/281251/282321/512242/511839/282657/281249/513478/100137872/534069/338038/520277/444867/282089/286768/529049/338049/521196/515034/618722/282498/282491/539584/506214/281020/505453/531391/408016/539941	56
bta04145	Phagosome	49/1869	170/8735	0.0129488	0.0129488	0.0174468	282564/281877/539764/281875/526329/317777/535605/505538/282229/782652/613724/281052/518974/505224/281873/507859/614135/407129/281088/281036/613991/507031/529148/541281/281530/508327/614128/281876/511839/282657/338089/281346/282346/338038/286768/529049/511206/282642/537748/615778/505064/618722/282498/281586/282491/506214/504741/534206/281345	49
bta04150	mTOR signaling pathway	45/1869	154/8735	0.0130599	0.0130599	0.0174568	790875/505075/511451/537330/533908/538954/286865/407210/528204/282527/508008/788925/510434/517953/533861/508327/282657/617606/338089/613288/100137872/504531/534624/506974/526642/282369/282001/507056/404181/540753/515024/535298/282307/281848/338049/521196/533782/512530/282325/534485/531391/281073/509613/281854/507107	45
bta04213	Longevity regulating pathway - multiple species	21/1869	62/8735	0.015516	0.015516	0.0204202	505740/538954/286865/281601/535530/532686/788151/535603/535017/520639/281719/531682/100137872/504531/507056/404181/282307/281848/540190/525482/782397	21
bta05220	Chronic myeloid leukemia	25/1869	77/8735	0.0155194	0.0155194	0.0204202	529631/286865/511754/616115/510434/281855/524734/515125/540876/534712/282152/100137872/534069/504531/282089/535298/282307/535376/521196/513497/541184/531391/281073/281730/281854	25
bta00630	Glyoxylate and dicarboxylate metabolism	12/1869	30/8735	0.0160296	0.0160296	0.0209281	515902/509481/533910/280976/280682/507688/614302/506459/282873/511082/531682/281199	12
bta04664	Fc epsilon RI signaling pathway	23/1869	70/8735	0.0170804	0.0170804	0.0221284	286865/507329/537631/510434/617345/534125/515515/527263/522866/534996/100137872/504531/282001/526469/516039/286883/535298/282307/513244/521196/531391/539941/404074	23
bta05222	Small cell lung cancer	29/1869	94/8735	0.0200073	0.0200073	0.0257225	317711/281875/286865/511754/520030/537782/616115/529670/281855/282191/534712/281876/282152/506270/100137872/504531/282023/507234/529939/515011/282307/506182/692183/513497/541184/281020/281073/408016/281854	29
bta00512	Mucin type O-glycan biosynthesis	12/1869	31/8735	0.0211806	0.0211806	0.0270247	618078/539417/506903/281778/508488/526331/540500/282351/614203/504951/505622/616218	12
bta05014	Amyotrophic lateral sclerosis (ALS)	20/1869	60/8735	0.021427	0.021427	0.0271335	539764/537804/537782/282527/510373/286852/529618/533527/281347/537380/282321/282152/404121/531682/614283/516039/286883/535158/281020/408016	20
bta04917	Prolactin signaling pathway	26/1869	83/8735	0.0220014	0.0220014	0.0274482	282357/790875/510814/286865/616576/615414/616115/537631/510434/534125/789216/535530/524734/281146/514773/281900/513836/100137872/504531/508541/535298/282307/281422/521196/531391/539941	26
bta04976	Bile secretion	26/1869	83/8735	0.0220014	0.0220014	0.0274482	505740/523291/317654/537960/515161/282356/281067/282653/281601/282472/540528/536203/281276/519461/404177/788151/535603/281793/535017/535293/282346/282361/533560/533151/407224/525482	26
bta00010	Glycolysis / Gluconeogenesis	21/1869	64/8735	0.0223819	0.0223819	0.027566	534402/533910/616576/533785/281275/506980/513483/514066/512571/506459/282873/507119/512723/508629/513967/281617/541067/404148/614824/280817/537256	21
bta04662	B cell receptor signaling pathway	27/1869	87/8735	0.0224232	0.0224232	0.027566	790875/286865/507329/282229/616115/286852/533156/510434/617345/515515/533527/281855/282321/534996/100137872/504531/541127/535298/282307/521196/511224/282325/515377/531391/510393/281073/281854	27
bta05205	Proteoglycans in cancer	56/1869	205/8735	0.0247521	0.0247521	0.0302086	282564/540803/281875/505075/317654/537330/286865/540060/525416/538606/282094/281878/280760/281873/785655/508008/532713/510434/617345/530719/615239/281530/281876/506270/615785/519269/281057/613288/100137872/534069/504531/540085/282089/282001/508541/404181/540753/282642/535298/282307/281848/317697/613533/338049/521196/533782/281879/513497/281572/282325/531391/519037/506724/281768/408016/506939	56
bta04979	Cholesterol metabolism	17/1869	50/8735	0.0267605	0.0267605	0.032291	511199/281052/281033/281276/509963/282119/535379/280843/535192/326580/505640/282346/281006/541070/286772/516024/100125267	17
bta00564	Glycerophospholipid metabolism	31/1869	104/8735	0.0268419	0.0268419	0.032291	514554/100125779/506607/504948/614911/617707/513389/537171/511291/506348/515361/515186/767822/507456/526175/522866/537224/526739/509819/511887/541208/504236/524639/535126/617172/788450/514456/515135/529067/497202/530414	31
bta05214	Glioma	24/1869	77/8735	0.0286741	0.0286741	0.0342505	286865/511754/525416/532713/510434/530719/527165/524734/539277/617095/534712/100137872/504531/511504/520277/282001/535298/282307/281848/521196/513497/541184/282325/531391	24
bta04350	TGF-beta signaling pathway	28/1869	93/8735	0.0301299	0.0301299	0.0355575	281598/407127/788948/280760/506721/768050/281154/511279/515125/281530/407216/510559/524870/540595/407175/534069/540488/282089/535321/404181/535376/338049/282131/535916/505453/531391/524361/530748	28
bta05225	Hepatocellular carcinoma	48/1869	174/8735	0.0301905	0.0301905	0.0355575	790875/505075/497024/537330/540181/507346/286865/511754/282388/508008/535399/510434/414274/282684/540904/507648/524734/515125/534712/282152/613288/100137872/534069/504531/540085/282389/537412/519632/515409/282089/282001/404181/540753/535298/511619/282307/281848/535376/521196/533782/513497/281805/541184/282325/504357/531391/540481/505642	48
bta00062	Fatty acid elongation	11/1869	29/8735	0.0313141	0.0313141	0.0366247	613886/525765/533333/614105/532015/100125237/789567/514788/617293/615756/281748	11
bta04340	Hedgehog signaling pathway	17/1869	51/8735	0.0323768	0.0323768	0.0376064	790875/512018/510255/534325/768006/615414/280834/282874/506060/282684/527889/281637/282136/523542/281020/535067/536011	17
bta05033	Nicotine addiction	14/1869	40/8735	0.0331191	0.0331191	0.0382052	537804/282238/529618/282648/540657/780973/100295209/534626/282410/529904/614283/535158/529593/523515	14
bta01522	Endocrine resistance	28/1869	94/8735	0.0344244	0.0344244	0.0394408	505740/286865/281601/537631/510434/534125/788151/524734/281146/535603/534712/281793/506270/535017/100137872/504531/507663/404181/535298/282307/281848/521196/513497/541184/281020/525482/531391/539941	28
bta04114	Oocyte meiosis	34/1869	119/8735	0.0384507	0.0384507	0.0437561	505740/533908/515376/525416/281601/506740/281878/497026/532713/286852/530719/533527/517953/788151/533617/539277/617095/282321/535603/535017/100848466/533788/520277/535321/281848/505757/317697/281879/525482/517837/531391/515399/537016/524361	34
bta05164	Influenza A	49/1869	181/8735	0.0394082	0.0394082	0.0445448	280872/282258/511037/510814/507481/286865/511754/511023/537782/282527/510373/616115/615107/510434/512484/282119/507054/508619/280897/281855/509855/506415/281250/281251/286770/281249/100137872/533216/504531/654488/519922/282001/327712/281942/282307/100138545/506182/521196/618722/282498/282491/506214/505453/282325/531391/789280/281073/408016/281854	49
bta04530	Tight junction	48/1869	177/8735	0.0400059	0.0400059	0.0447967	538846/528478/511594/529631/282184/508268/535605/536993/505940/533725/282031/538954/281258/281067/515421/533297/537631/509290/533531/534125/407100/407101/327716/508045/537380/404089/524770/614242/507041/506545/281876/539687/286877/522269/535321/512975/788772/523962/512405/408013/338049/515620/530050/514998/524361/539941/513412/506939	48
bta00020	Citrate cycle (TCA cycle)	11/1869	30/8735	0.040163	0.040163	0.0447967	286840/534599/533910/280976/280682/509983/512723/520260/511135/282446/537713	11
bta03060	Protein export	9/1869	23/8735	0.0406199	0.0406199	0.0450082	538938/541040/415113/614128/538777/614017/615778/505064/504842	9
bta05132	Salmonella infection	59/1869	224/8735	0.042915	0.042915	0.0472405	531741/539764/526329/100141021/507481/537690/613724/528654/281577/513641/515421/281557/517887/282527/519958/535399/616115/537631/510434/518833/534125/509080/511691/280950/535127/506218/281855/539484/281251/540719/540815/513939/281249/100137872/407152/515552/510197/526469/516039/286883/513895/788772/536605/508999/511561/537748/613533/338049/521196/513431/281020/530050/531391/508402/540481/281073/4…	59
bta04920	Adipocytokine signaling pathway	22/1869	72/8735	0.0433857	0.0433857	0.0474485	538954/282356/281052/504216/282527/281992/616115/338446/537631/534125/281855/505901/100137872/407235/509084/515338/508541/281073/514159/537161/281854/539941	22
bta04215	Apoptosis - multiple species	12/1869	34/8735	0.0438727	0.0438727	0.0476715	507481/537782/282527/510373/537631/534125/534211/507390/282152/281020/408016/539941	12
bta04914	Progesterone-mediated oocyte maturation	26/1869	88/8735	0.0444069	0.0444069	0.0479092	505740/533908/286865/539521/281790/281601/537631/534125/530333/517953/788151/535603/535017/100848466/100137872/504531/526376/282307/281848/521196/525482/517837/531391/506294/537016/539941	26
bta00600	Sphingolipid metabolism	16/1869	49/8735	0.0446604	0.0446604	0.0479092	616901/617707/281566/505233/518021/540732/614165/615110/514201/617172/540994/507188/524460/533538/510620/522515	16
bta04744	Phototransduction	10/1869	27/8735	0.0461359	0.0461359	0.0491789	281802/281973/539277/617095/281201/520277/281453/509933/282243/286851	10

## Sheet: CC vs. SC Pathways (DPMGs)
ID	Description	GeneRatio	BgRatio	pvalue	p.adjust	qvalue	geneID	Count
bta05215	Prostate cancer	12/313	98/8988	0.000142598	0.000142598	0.037676	535231/511037/540378/512613/510434/280675/535298/513497/531391/404193/281806/525938	12
bta05225	Hepatocellular carcinoma	15/313	174/8988	0.00107721	0.00107721	0.097725	507196/327709/783879/540662/510434/532791/282382/516190/519632/535298/506557/513497/531391/281806/525938	15
bta00983	Drug metabolism - other enzymes	9/313	76/8988	0.00122816	0.00122816	0.097725	281568/327709/783879/509965/516190/504652/511644/281806/525938	9
bta01524	Platinum drug resistance	9/313	78/8988	0.0014795	0.0014795	0.097725	327709/783879/540378/540526/516190/513497/531391/281806/525938	9
bta04012	ErbB signaling pathway	9/313	84/8988	0.00249002	0.00249002	0.114176	536154/507196/512613/280737/510434/535298/513497/531391/282162	9
bta04072	Phospholipase D signaling pathway	13/313	153/8988	0.00259284	0.00259284	0.114176	507196/530001/538439/517887/510434/535603/513723/282861/515621/535298/531391/530414/527114	13
bta05220	Chronic myeloid leukemia	8/313	77/8988	0.00515842	0.00515842	0.194701	507196/540378/512613/510434/282382/535298/513497/531391	8

## Sheet: CC vs. HC Pathways (DPMGs)
ID	Description	GeneRatio	BgRatio	pvalue	p.adjust	qvalue	geneID	Count
bta04921	Oxytocin signaling pathway	20/402	153/8988	1.46259e-05	1.46259e-05	0.00329468	539521/281601/538606/281341/541140/281357/788151/282041/535603/281355/282318/327672/515621/282001/529382/408013/281879/282325/531391/282162	20
bta05164	Influenza A	21/402	188/8988	9.64781e-05	9.64781e-05	0.0088277	280872/282257/507215/280873/537201/510767/282527/532723/282119/347700/513080/539974/281249/533216/327672/282001/282497/282325/531391/282846/281854	21
bta04270	Vascular smooth muscle contraction	17/402	139/8988	0.000147734	0.000147734	0.0088277	281607/281601/538606/281341/281357/788151/282041/535603/282861/281355/282318/327672/282001/408013/281879/282325/531391	17
bta04720	Long-term potentiation	11/402	69/8988	0.000218895	0.000218895	0.0088277	281601/767949/541140/282318/327672/282001/535158/281879/282325/531391/282162	11
bta04935	Growth hormone synthesis, secretion and action	15/402	118/8988	0.000234258	0.000234258	0.0088277	509827/507196/539521/281782/281601/541140/788151/535603/327672/282001/516039/408013/281879/282325/531391	15
bta04912	GnRH signaling pathway	13/402	93/8988	0.00023513	0.00023513	0.0088277	514554/281601/541140/788151/535603/327672/282001/516039/408013/281879/282325/531391/282162	13
bta04611	Platelet activation	15/402	121/8988	0.000309417	0.000309417	0.00995718	281963/539521/281601/538606/788151/533125/282041/507309/535603/534996/282318/327672/515621/281879/531391	15
bta04725	Cholinergic synapse	14/402	114/8988	0.000536867	0.000536867	0.015117	539521/281601/541140/788151/512311/535603/327672/515621/282001/408013/281879/282325/531391/282162	14
bta04727	GABAergic synapse	12/402	91/8988	0.000696604	0.000696604	0.017334	539521/281601/338044/514339/282238/780973/788151/535603/282001/408013/616071/282325	12
bta04540	Gap junction	12/402	92/8988	0.0007695	0.0007695	0.017334	539521/281601/541140/768036/788151/282577/535603/327672/282001/281879/282325/531391	12
bta04724	Glutamatergic synapse	13/402	113/8988	0.00154945	0.00154945	0.0243442	514554/539521/281601/338044/788151/535603/327672/282001/535158/408013/281879/282325/531391	13
bta04022	cGMP-PKG signaling pathway	17/402	171/8988	0.0016451	0.0016451	0.0243442	281607/509827/539521/281601/538606/282119/281357/788151/282041/535603/281355/282318/327672/515621/408013/281879/531391	17
bta05145	Toxoplasmosis	13/402	114/8988	0.00167979	0.00167979	0.0243442	767864/537201/539521/510767/282527/286849/539124/327672/515621/516039/282497/531391/281854	13
bta04713	Circadian entrainment	12/402	101/8988	0.00176104	0.00176104	0.0243442	539521/281601/788151/535603/327672/282001/535158/408013/281879/282325/531391/282162	12
bta04934	Cushing syndrome	16/402	158/8988	0.00184482	0.00184482	0.0243442	281607/524446/509827/539521/281601/540662/512613/445419/788151/535603/520260/327672/408013/281879/531391/282162	16
bta04916	Melanogenesis	12/402	102/8988	0.00191737	0.00191737	0.0243442	539521/281601/540662/541140/445419/788151/535603/327672/282001/282325/531391/282162	12
bta05205	Proteoglycans in cancer	19/402	204/8988	0.00193687	0.00193687	0.0243442	493642/538606/540662/541140/407170/445419/282041/281057/281161/282318/327672/282001/505709/281879/282325/531391/281440/281768/282162	19
bta04971	Gastric acid secretion	10/402	76/8988	0.00194526	0.00194526	0.0243442	539521/281601/788151/535603/280740/282001/613890/281879/282325/282162	10
bta05017	Spinocerebellar ataxia	15/402	146/8988	0.00219867	0.00219867	0.0260673	539739/281450/510767/539141/282119/518637/515503/282001/535158/519961/507213/281879/515757/282325/768316	15
bta04928	Parathyroid hormone synthesis, secretion and action	12/402	105/8988	0.002456	0.002456	0.0276623	514554/509827/539521/281601/788151/535603/327672/282001/281879/282325/531391/281768	12
bta04261	Adrenergic signaling in cardiomyocytes	15/402	150/8988	0.00286235	0.00286235	0.0293251	281607/509827/539521/281601/767949/788151/535603/282318/327672/515621/282001/529382/408013/531391/282162	15
bta01521	EGFR tyrosine kinase inhibitor resistance	10/402	80/8988	0.002864	0.002864	0.0293251	537201/507196/541140/407170/281161/327672/282001/505709/282325/531391	10
bta04072	Phospholipase D signaling pathway	15/402	153/8988	0.00346192	0.00346192	0.0337589	514554/281607/507196/281601/517887/541140/508819/507456/788151/535603/282861/327672/515621/282001/531391	15
bta04925	Aldosterone synthesis and secretion	11/402	96/8988	0.00359675	0.00359675	0.0337589	281607/509827/281601/788151/535603/281355/282001/408013/281879/282325/282162	11
bta04911	Insulin secretion	10/402	85/8988	0.00446729	0.00446729	0.0402527	509827/281601/788151/535603/538927/282001/408013/281879/282325/282162	10
bta05417	Lipid and atherosclerosis	20/402	239/8988	0.00514854	0.00514854	0.0427488	507215/510767/541140/282527/535820/282041/286849/534996/281249/281631/539124/533216/327672/282001/516039/531391/282846/281440/281854/282162	20
bta04714	Thermogenesis	20/402	240/8988	0.0053914	0.0053914	0.0427488	338061/509827/282701/281601/541140/404188/414274/788151/615979/614794/504290/535603/100296470/281355/281561/282199/516039/539832/282394/281768	20
bta04730	Long-term depression	8/402	61/8988	0.00549926	0.00549926	0.0427488	539521/541140/534996/327672/282001/281879/282325/531391	8
bta04960	Aldosterone-regulated sodium reabsorption	6/402	37/8988	0.00551827	0.00551827	0.0427488	541140/327672/282001/282325/617802/531391	6
bta04914	Progesterone-mediated oocyte maturation	10/402	88/8988	0.00572485	0.00572485	0.0427488	539521/281601/541140/281667/788151/514777/535603/540537/327672/531391	10
bta04010	MAPK signaling pathway	23/402	292/8988	0.00588296	0.00588296	0.0427488	509827/541140/282527/533155/407170/536771/533125/282140/539124/535625/281161/327672/522002/282001/516039/505709/529382/408013/282325/531391/281440/281768/281854	23
bta04977	Vitamin digestion and absorption	5/402	27/8988	0.0062377	0.0062377	0.0439101	537669/281631/616252/281588/505865	5
bta05014	Amyotrophic lateral sclerosis	28/402	384/8988	0.00723183	0.00723183	0.0482703	338061/282701/505393/510767/539141/282527/404188/768036/505129/282119/507345/518637/785768/535820/511045/513080/515503/540111/282199/516039/535158/519961/507213/100125264/281879/282394/281440/768316	28
bta04071	Sphingolipid signaling pathway	12/402	120/8988	0.00728565	0.00728565	0.0482703	514554/539521/541140/282527/537972/282041/327672/282001/281588/282325/531391/281440	12
bta04723	Retrograde endocannabinoid signaling	14/402	152/8988	0.00804187	0.00804187	0.0517582	338061/539521/281601/404188/282238/780973/788151/535603/327672/282001/408013/281879/282325/531391	14
bta04015	Rap1 signaling pathway	18/402	217/8988	0.00845547	0.00845547	0.0529085	281963/539521/281601/541140/407170/536771/788151/535603/282140/281161/327672/282001/516039/539292/282325/531391/281440/281768	18
bta05166	Human T-cell leukemia virus 1 infection	19/402	235/8988	0.00901889	0.00901889	0.0549087	509827/537201/281601/614382/541140/282527/281667/508641/282119/788151/535603/286849/540537/327672/282497/280845/531391/281854/531389	19
bta04927	Cortisol synthesis and secretion	8/402	67/8988	0.00966105	0.00966105	0.0572705	281607/509827/281601/281949/788151/535603/408013/281879	8
bta04066	HIF-1 signaling pathway	11/402	110/8988	0.00997969	0.00997969	0.0576425	512613/507476/282140/281355/327672/536763/282001/505709/282325/531391/282162	11
bta05022	Pathways of neurodegeneration - multiple diseases	33/402	490/8988	0.0118124	0.0118124	0.0635451	338061/282701/505393/510767/539141/532626/540662/541140/282527/404188/768036/282119/445419/507345/518637/535820/511045/515503/282199/327672/282001/516039/535158/519961/507213/408013/281879/282394/282325/531391/281440/282162/768316	33
bta04621	NOD-like receptor signaling pathway	16/402	192/8988	0.012124	0.012124	0.0635451	282257/537201/520472/282119/767903/507427/539974/281249/539124/533216/327672/282164/281879/531391/282846/281854	16
bta04550	Signaling pathways regulating pluripotency of stem cells	13/402	144/8988	0.0122391	0.0122391	0.0635451	407127/537201/281867/507415/540662/530785/541140/445419/613877/281161/327672/531391/281768	13
bta04012	ErbB signaling pathway	9/402	84/8988	0.0124121	0.0124121	0.0635451	507196/541140/512613/327672/282001/505709/282325/531391/282162	9
bta04146	Peroxisome	9/402	84/8988	0.0124121	0.0124121	0.0635451	613679/508918/526059/281997/515178/112448521/540337/512677/525262	9
bta05231	Choline metabolism in cancer	10/402	99/8988	0.0128243	0.0128243	0.0641964	514554/541140/508819/519461/512311/327672/282001/282325/531391/281440	10
bta04370	VEGF signaling pathway	7/402	58/8988	0.0142811	0.0142811	0.0699347	541140/407170/327672/282001/282325/531391/281440	7
bta05020	Prion disease	21/402	282/8988	0.0150475	0.0150475	0.0721204	338061/509827/282701/493642/510767/539141/404188/768036/282119/518637/535820/515503/282199/327672/535158/507213/408013/281879/282394/531391/281440	21
bta05163	Human cytomegalovirus infection	19/402	251/8988	0.0172636	0.0172636	0.0799046	767864/509827/537201/539521/510767/281601/541140/282527/788151/282329/282041/535603/327672/282001/281879/282325/531391/281440/281854	19
bta04020	Calcium signaling pathway	19/402	252/8988	0.0179281	0.0179281	0.0799046	281607/281601/407170/536771/282119/788151/535603/282861/281161/527499/282001/505709/535158/408013/281879/282325/281768/282162/516679	19
bta04510	Focal adhesion	16/402	201/8988	0.0180778	0.0180778	0.0799046	507196/281450/493642/538606/407170/508819/541281/282041/282318/327672/522269/282001/505709/282325/531391/281440	16
bta05169	Epstein-Barr virus infection	18/402	235/8988	0.0180905	0.0180905	0.0799046	282257/537201/510767/512613/281667/518637/347700/280955/286849/534996/281057/539124/533216/407126/516039/282497/281440/281854	18
bta04918	Thyroid hormone synthesis	8/402	76/8988	0.019766	0.019766	0.0840106	509827/281601/788151/535603/282001/281879/282325/506406	8
bta05212	Pancreatic cancer	8/402	76/8988	0.019766	0.019766	0.0840106	514554/537201/541140/327672/505709/531391/281440/281854	8
bta01240	Biosynthesis of cofactors	13/402	154/8988	0.0204149	0.0204149	0.0851616	281568/280994/504889/509965/767849/533836/280715/525059/515614/281482/511042/519632/513400	13
bta05032	Morphine addiction	9/402	92/8988	0.0214801	0.0214801	0.0866556	524446/539521/281601/282238/780973/788151/535603/282001/282325	9
bta04141	Protein processing in endoplasmic reticulum	14/402	172/8988	0.0219271	0.0219271	0.0866556	538938/533668/504832/790870/507345/528862/535820/347700/525222/507541/511801/535287/615007/508358	14
bta05160	Hepatitis C	14/402	172/8988	0.0219271	0.0219271	0.0866556	280872/282257/280873/537201/510767/541140/282527/535820/347700/539124/533216/327672/531391/281854	14
bta01524	Platinum drug resistance	8/402	78/8988	0.0227681	0.0227681	0.0868745	510767/615552/506093/327672/505709/513606/521685/531391	8
bta05010	Alzheimer disease	26/402	385/8988	0.0232047	0.0232047	0.0868745	338061/282701/510767/539141/540662/541140/282527/404188/768036/282119/445419/518637/535820/347700/515503/282199/327672/535158/519961/507213/408013/281879/282394/531391/281854/768316	26
bta04979	Cholesterol metabolism	6/402	50/8988	0.023228	0.023228	0.0868745	505394/513554/282119/505640/281631/286772	6
bta04150	mTOR signaling pathway	13/402	157/8988	0.0235251	0.0235251	0.0868745	540662/541140/282527/533155/445419/506754/327672/282001/534045/527459/282325/531391/281854	13
bta05225	Hepatocellular carcinoma	14/402	174/8988	0.0239547	0.0239547	0.0870341	507196/540662/541140/414274/445419/615552/506093/327672/519632/282001/506557/521685/282325/531391	14
bta01522	Endocrine resistance	9/402	94/8988	0.0243434	0.0243434	0.0870424	507196/281601/541140/512613/788151/535603/327672/505709/531391	9
bta04750	Inflammatory mediator regulation of TRP channels	10/402	110/8988	0.0251176	0.0251176	0.0879657	281601/788151/282329/535603/282318/282001/516039/281879/282325/282162	10
bta04929	GnRH secretion	7/402	65/8988	0.0253826	0.0253826	0.0879657	541140/327672/282001/408013/281879/282325/531391	7
bta04950	Maturity onset diabetes of the young	4/402	26/8988	0.0270108	0.0270108	0.0915506	539487/616211/538927/503578	4
bta05161	Hepatitis B	14/402	177/8988	0.027254	0.027254	0.0915506	282257/509827/537201/510767/541140/281667/539124/533216/327672/282001/516039/282325/531391/281854	14
bta00510	N-Glycan biosynthesis	6/402	52/8988	0.0276363	0.0276363	0.0915506	526256/526844/504908/527449/507210/615007	6
bta04360	Axon guidance	14/402	179/8988	0.0296326	0.0296326	0.0967412	407127/787473/539521/541140/445419/282041/286859/327672/282001/539996/539292/531391/281440/282162	14
bta05215	Prostate cancer	9/402	98/8988	0.0308663	0.0308663	0.0993291	535231/541140/512613/527024/327672/505709/531391/281768/281854	9
bta05031	Amphetamine addiction	7/402	69/8988	0.0338441	0.0338441	0.107378	509827/282318/282001/535158/408013/282325/282162	7
bta00030	Pentose phosphate pathway	4/402	28/8988	0.0345072	0.0345072	0.107961	533764/534402/513483/445425	4
bta04662	B cell receptor signaling pathway	8/402	85/8988	0.0357852	0.0357852	0.110258	541140/534996/407126/327672/282325/531391/281440/281854	8
bta04664	Fc epsilon RI signaling pathway	7/402	70/8988	0.0362203	0.0362203	0.110258	541140/534996/327672/282001/516039/531391/281440	7
bta04024	cAMP signaling pathway	17/402	238/8988	0.0380908	0.0380908	0.112686	514554/539521/790124/281601/538606/788151/282329/282041/535603/281355/282318/327672/535158/408013/531391/281440/282162	17
bta03015	mRNA surveillance pathway	9/402	102/8988	0.0385186	0.0385186	0.112686	282588/511286/508491/282318/527436/518859/540191/532337/783569	9
bta04972	Pancreatic secretion	9/402	102/8988	0.0385186	0.0385186	0.112686	281601/788151/535603/280740/282001/281879/282325/281440/516679	9
bta00230	Purine metabolism	11/402	135/8988	0.0392135	0.0392135	0.113248	524446/534402/524973/281601/504305/281357/788151/535603/280715/692183/521103	11
bta04114	Oocyte meiosis	10/402	119/8988	0.0401708	0.0401708	0.114544	281601/788151/514777/535603/540537/282318/327672/281879/531391/282162	10
bta05152	Tuberculosis	15/402	205/8988	0.0414437	0.0414437	0.115819	767864/537201/510767/614382/282527/281897/281249/539124/327672/529049/282164/282497/531391/282162/508832	15
bta00513	Various types of N-glycan biosynthesis	5/402	43/8988	0.0416463	0.0416463	0.115819	526256/618571/527449/507210/615007	5
bta00730	Thiamine metabolism	3/402	18/8988	0.0439752	0.0439752	0.117376	280994/280715/521103	3
bta05223	Non-small cell lung cancer	7/402	73/8988	0.0440005	0.0440005	0.117376	541140/327672/282001/505709/692183/282325/531391	7
bta04726	Serotonergic synapse	10/402	121/8988	0.0442112	0.0442112	0.117376	539521/541140/785824/327672/282001/286820/408013/281879/282325/531391	10
bta05132	Salmonella infection	18/402	261/8988	0.0448056	0.0448056	0.117376	507215/510767/517887/282527/768036/535127/507427/531907/282041/511045/281249/539124/327672/516039/531391/282846/281440/281854	18
bta04915	Estrogen signaling pathway	11/402	138/8988	0.0448388	0.0448388	0.117376	509827/507196/539521/281601/541140/788151/535603/327672/514812/281879/531391	11
bta05143	African trypanosomiasis	5/402	44/8988	0.0453322	0.0453322	0.117376	281249/281631/281355/282001/282325	5
bta04062	Chemokine signaling pathway	14/402	191/8988	0.0471861	0.0471861	0.120787	507196/539521/281601/541140/788151/282041/535603/534996/327672/515621/282325/531391/281440/281854	14
bta04371	Apelin signaling pathway	11/402	140/8988	0.0488825	0.0488825	0.123724	281607/539521/281601/541140/788151/535603/281561/327672/515621/281879/531391	11

## Sheet: SC vs. HC GO Pathways (DPMGs)
ID	Description	GeneRatio	BgRatio	pvalue	p.adjust	qvalue	geneID	Count
bta04350	TGF-beta signaling pathway	11/338	93/8988	0.000697271	0.000697271	0.198172	530785/282320/527124/282382/286859/524870/530147/535632/512301/535321/404181	11
