# Supplementary material for: Genome-Wide DNA Methylation Profile in Jejunum Reveals the Potential Genes Associated With Paratuberculosis in Dairy Cattle
Source: Front Genet. 2021 Oct 15;12:735147. doi: 10.3389/fgene.2021.735147 (PMC8554095; doi:10.3389/fgene.2021.735147)
Supplement: Supplementary file 7 [file Table4.XLSX]

## Sheet: DMGs & DEGs in the CC vs. HC
The common genes of DMGs and DEGs among clinical and healthy group
gene_name	CC_FPKM	HC_FPKM	log2(foldchange)	qvalue	start	end	areaStat	direction	region	CC_methylation_level	HC_methylation_level
TNC	6.75	0	-	0.0259	104221341	104221719	12.94	hyper	intron(104221341-104221592)	0.697413	0.550822
									exon(104221593-104221719)
					104287950	104288169	11.31	hyper	intron	0.531088	0.375628
SNX10	128.11	11.52	3.47	0.016	69650228	69650715	16.83	hyper	intron	0.714968	0.582278
					69621363	69621528	-16.61	hypo	intron	0.520443	0.634965
ACBD7	41.43	0.45	6.52	0.0034	29659651	29659900	-14.68	hypo	intron	0.35363	0.464639
GATA4	0.04	11.9	-8.31	0.0005	7687648	7687996	23.55	hyper	intron	0.702406	0.456776
					7642901	7643127	-14.32	hypo	exon	0.309859	0.469935
SLC5A4	0.05	12.82	-8.12	0.0242	70648894	70649190	23.85	hyper	intron	0.653986	0.50302
MX2	44.99	3.62	3.63	0.0136	141649669	141650428	52.6	hyper	exon(141649669-141649788)	0.491606	0.32184
									intron( 141649789-141650007)
									exon(141650008-141650150)
									intron(141650151-141650428)
					141652806	141653175	-31.71	hypo	itron(141652806-141653046)	0.626275	0.779124
									exon(141653047-141653123)
									intron(141653124-141653175)
					141655037	141655153	-16.1	hypo	intron	0.611971	0.715744
SDSL	0.04	13.62	-8.38	0.0236	61010544	61011024	19.18	hyper	intron	0.559137	0.416099
CD44	15.64	0.89	4.14	0.0339	65670708	65671043	-58.04	hypo	intron	0.560292	0.706846
					65651667	65652103	-33.44	hypo	intron	0.232175	0.386171
					65651044	65651230	-33.04	hypo	intron	0.0798185	0.247615
					65661409	65661642	14.79	hyper	intron	0.722289	0.612198
					65722353	65722454	14.75	hyper	intron	0.933707	0.809884
MREG	27.31	2.61	3.39	0.0185	104028772	104029081	25.73	hyper	intron	0.74723	0.608874
					104007749	104008177	19.04	hyper	intron	0.806498	0.692548
					104005813	104006092	-9.65	hypo	intron	0.436761	0.569917
SLC27A4	5.87	143.6	-4.61	0.0197	98958549	98958747	8.82	hyper	intron	0.447169	0.338852
ENPP3	4.41	299.52	-6.08	0.0208	69648517	69648953	10.33	hyper	intron	0.636092	0.437138
CADM1	172.31	15.87	3.44	0.0188	26020556	26020992	-59.59	hypo	intron	0.631487	0.780762
					25869618	25870097	31.52	hyper	intron	0.793955	0.637851
					25905570	25906274	30.25	hyper	intron	0.786241	0.660414
					25737675	25738137	24.48	hyper	intron	0.824066	0.670296
DTNA	0	4.83	-	0.0137	22380061	22380218	17.12	hyper	intron	0.795405	0.66068
ME3	0	1.21	-	0.0018	8906618	8907483	-35.69	hypo	intron	0.604726	0.762244
					8959548	8960017	29.17	hyper	intron	0.676397	0.501264
					8921704	8922388	28.98	hyper	intron	0.749402	0.628979
					9084600	9085331	-23.21	hypo	intron	0.559348	0.681172
					9085724	9086168	-22.03	hypo	intron	0.683746	0.810768
					9102299	9102641	21.71	hyper	intron	0.686462	0.553212
					8899974	8900530	-21.61	hypo	intron	0.609755	0.803685
					8910793	8911115	-16.47	hypo	intron	0.463573	0.647313
					8892653	8892801	14.55	hyper	intron	0.843879	0.741137
					8970087	8970344	14.02	hyper	intron	0.732664	0.556704
					8986839	8987191	-12.29	hypo	intron	0.575618	0.678518
					8938450	8938708	12.02	hyper	intron	0.755469	0.588103
					8893212	8893325	10.94	hyper	intron	0.849031	0.743691
					8947156	8947215	8.49	hyper	intron	0.833166	0.69113
SLC2A2	0.06	10.55	-7.44	0.0181	96482288	96482733	-20.55	hypo	exon	0.548911	0.675094
					96480261	96480341	11.1	hyper	intron(96480261-96480312)	0.711402	0.600421
									exon(96480313-96480341)
PHLDB1	2.89	0	-	3e-07	29276319	29276695	26.54	hyper	intron	0.637227	0.470385
					29270482	29270971	12.03	hyper	intron	0.792723	0.671748
MFGE8	0	1.44	-	0.0013	20481713	20481837	-12.07	hypo	intron	0.120868	0.232491
DMGs: differentially methylated genes; DEGs: differentially expressed genes

## Sheet: DMGs & DEGs in the CC vs. SC
The common genes of DMGs and DEGs among clinical and subclinical group
gene_name	CC_FPKM	SC_FPKM	log2(foldchange)	qvalue	start	end	areaStat	direction	region	CC_methylation_level	SC_methylation_level
GATA4	0.04	8.68	-7.86	0.0414	7642740	7643127	-11.69	hypo	exon	0.315801	0.426686
ATP6V0D2	15.69	0.52	4.91	0.0384	76573350	76573702	16.98	hyper	intron	0.881708	0.77119
					76563515	76563540	10.76	hyper	intron	0.44063	0.321193
CUBN	35.24	2.11	4.06	0.0274	31414360	31415159	-65.4	hypo	intron	0.350585	0.466786
					31471179	31471234	11.3	hyper	intron	0.822339	0.690846
PPARG	7.33	0	-	0.00216	56743597	56743647	15.64	hyper	intron	0.820501	0.690766
TUFT1	0	1.37	-	0.0049	19235841	19236026	-16.86	hypo	intron	0.548181	0.656472
SVIL	0.2	5.13	-4.68	0.0142	34662543	34662718	-39.27	hypo	exon(34662543-34662665)	0.353773	0.491617
									intron(34662666-34662718)
					34634453	34634955	-33.94	hypo	intron(34634453-34634690)	0.379649	0.50485
									exon(34634691-34634955)
					34619608	34619832	24.02	hyper	intron	0.618243	0.486967
CALCRL	0	5.07	-11.28	0.00164	8943843	8944387	33.27	hyper	intron	0.694515	0.562495
DMGs: differentially methylated genes; DEGs: differentially expressed genes

## Sheet: DMGs & DEGs in the SC vs. HC
The common genes of DMGs and DEGs among subclinical and healthy group
gene_name	SC_FPKM	HC_FPKM	log2(foldchange)	qvalue	start	end	areaStat	direction	region	SC_methylation_level	HC_methylation_level
TNC	5	0	-	0.0379	104215759	104216013	16.93	hyper	intron	0.786664	0.640028
					104249405	104249631	14.24	hyper	intron	0.615243	0.467867
CXCL9	283.99	15.44	4.2	0.000851	90862603	90862713	-11.58	hypo	intron	0.490325	0.622479
TGM3	18.1	0.13	7.11	0.0457	52808699	52808977	10.32	hyper	intron	0.742487	0.615944
SCTR	0.13	10.36	-6.28	0.00232	71269067	71269729	-20.49	hypo	intron	0.602986	0.725078
					71251821	71252484	16	hyper	intron(71251821-71251835)	0.71861	0.535089
									exon(71251836-71251963)
									intron(71251964-71252484)
PSAT1	45.08	8.14	2.47	0.0269	54218008	54218595	-29.58	hypo	intron	0.248089	0.404856
					54219011	54219432	-17.9	hypo	intron	0.706424	0.827081
CUBN	2.11	43.3	-4.36	0.00253	31476615	31477329	22.56	hyper	intron	0.690388	0.575717
					31492538	31492819	-16.15	hypo	intron	0.438239	0.574761
CXCL10	130.53	13.08	3.32	0.00309	90882561	90883160	-35.77	hypo	exon(90882561-90882836)	0.531821	0.659675
									intron(90882837-90883160)
PLAC8	313.11	58.97	2.41	0.0371	97967455	97967878	-43.72	hypo	intron	0.565151	0.72405
					97948055	97948972	30.22	hyper	intron	0.819928	0.718523
					97912111	97912585	-21.79	hypo	intron	0.199045	0.410647
					97914207	97914252	-8.72	hypo	intron	0.13777	0.342309
LOC616323	1.59	35.02	-4.46	0.0139	49304568	49305474	25.56	hyper	intron(49304568-49305185)	0.677365	0.529795
									exon(49305186-49305279)
									intron(49305280-49305474)
SVIL	0	1.94	-	0.00595	34662239	34662718	47.82	hyper	intron(34662239-34662513)	0.499997	0.286803
									exon(34662514-34662665)
									intron(34662666-34662718)
					34607116	34607740	37.24	hyper	intron(34607116-34607305)	0.830792	0.657473
									exon(34607306-34607454)
									intron(34607455-34607740)
					34629033	34629424	17.09	hyper	intron	0.835322	0.703537
					34578860	34578960	9.53	hyper	intron	0.737428	0.599473
PLA2G5	22.11	1.12	4.3	0.00431	132657035	132657592	-29.29	hypo	intron	0.420978	0.523395
CALCRL	5.07	0	-	0.000126	8978388	8978626	17.8	hyper	intron	0.629872	0.500631
DMGs: differentially methylated genes; DEGs: differentially expressed genes
