# Supplementary material for: Genome-Wide DNA Methylation Profile in Jejunum Reveals the Potential Genes Associated With Paratuberculosis in Dairy Cattle
Source: Front Genet. 2021 Oct 15;12:735147. doi: 10.3389/fgene.2021.735147 (PMC8554095; doi:10.3389/fgene.2021.735147)
Supplement: Supplementary file 8 [file Table1.XLSX]

## Sheet: Alignment
The alignment of sequencing
Group	Total sequence pairs	No alignments	Sequence pairs with alignments	Unique alignments	Not unique alignments	Alignments rate	Unique alignments rate	Total count of deduplicated leftover sequences
CC1	340430824	40033132	300397692	277915067	22482625	0.882405	0.816	0.8047
CC2	308781676	41724048	267057628	248318694	18738934	0.864875	0.804	0.8302
CC3	306820478	36954527	269865951	248353671	21512280	0.879557	0.809	0.8032
HC1	331680081	43653639	288026442	264410863	23615579	0.868386	0.797	0.7876
HC2	309925022	39798489	270126533	250934706	19191827	0.871587	0.81	0.8148
HC3	317191992	42152985	275039007	253597290	21441717	0.867106	0.8	0.8141
SC1	308549149	35676935	272872214	250767300	22104914	0.884372	0.813	0.851
SC2	303974272	38566152	265408120	247360611	18047509	0.873127	0.814	0.7916
SC3	316195187	42478911	273716276	253000297	20715979	0.865656	0.8	0.7951
CC: clinical cow; HC: healthy cow; SC: subclinical cow

## Sheet: Duplicate
The duplicated of sequencing
HC1
Final Cytosine Methylation Report
=================================
Total number of C's analysed:	14910146136
Total methylated C's in CpG context:	425905406
Total methylated C's in CHG context:	12870355
Total methylated C's in CHH context:	41572960
Total methylated C's in Unknown context:	54946
Total unmethylated C's in CpG context:	218898257
Total unmethylated C's in CHG context:	3264846001
Total unmethylated C's in CHH context:	10946053157
Total unmethylated C's in Unknown context:	5116221
C methylated in CpG context:	0.661
C methylated in CHG context:	0.004
C methylated in CHH context:	0.004
C methylated in unknown context (CN or CHN):	0.011
HC2
Final Cytosine Methylation Report
=================================
Total number of C's analysed:	14065463163
Total methylated C's in CpG context:	404573274
Total methylated C's in CHG context:	12167545
Total methylated C's in CHH context:	39709442
Total methylated C's in Unknown context:	52355
Total unmethylated C's in CpG context:	195011334
Total unmethylated C's in CHG context:	3075054591
Total unmethylated C's in CHH context:	10338946977
Total unmethylated C's in Unknown context:	4558392
C methylated in CpG context:	0.675
C methylated in CHG context:	0.004
C methylated in CHH context:	0.004
C methylated in unknown context (CN or CHN):	0.011
SC1
Final Cytosine Methylation Report
=================================
Total number of C's analysed:	14157920647
Total methylated C's in CpG context:	418592199
Total methylated C's in CHG context:	12512081
Total methylated C's in CHH context:	40325533
Total methylated C's in Unknown context:	53645
Total unmethylated C's in CpG context:	194587118
Total unmethylated C's in CHG context:	3098020629
Total unmethylated C's in CHH context:	10393883087
Total unmethylated C's in Unknown context:	4601729
C methylated in CpG context:	0.683
C methylated in CHG context:	0.004
C methylated in CHH context:	0.004
C methylated in unknown context (CN or CHN):	0.012
HC3
Final Cytosine Methylation Report
=================================
Total number of C's analysed:	14268805777
Total methylated C's in CpG context:	432441355
Total methylated C's in CHG context:	12464692
Total methylated C's in CHH context:	40425403
Total methylated C's in Unknown context:	54902
Total unmethylated C's in CpG context:	181105275
Total unmethylated C's in CHG context:	3121497431
Total unmethylated C's in CHH context:	10480871621
Total unmethylated C's in Unknown context:	4740082
C methylated in CpG context:	0.705
C methylated in CHG context:	0.004
C methylated in CHH context:	0.004
C methylated in unknown context (CN or CHN):	0.011
CC1
Final Cytosine Methylation Report
=================================
Total number of C's analysed:	15641811001
Total methylated C's in CpG context:	471982772
Total methylated C's in CHG context:	13636325
Total methylated C's in CHH context:	44239257
Total methylated C's in Unknown context:	60488
Total unmethylated C's in CpG context:	196667971
Total unmethylated C's in CHG context:	3408913669
Total unmethylated C's in CHH context:	11506371007
Total unmethylated C's in Unknown context:	5112051
C methylated in CpG context:	0.706
C methylated in CHG context:	0.004
C methylated in CHH context:	0.004
C methylated in unknown context (CN or CHN):	0.012
CC2
Final Cytosine Methylation Report
=================================
Total number of C's analysed:	13963258163
Total methylated C's in CpG context:	411508613
Total methylated C's in CHG context:	12093412
Total methylated C's in CHH context:	39508669
Total methylated C's in Unknown context:	51744
Total unmethylated C's in CpG context:	180026805
Total unmethylated C's in CHG context:	3041385071
Total unmethylated C's in CHH context:	10278735593
Total unmethylated C's in Unknown context:	4420715
C methylated in CpG context:	0.696
C methylated in CHG context:	0.004
C methylated in CHH context:	0.004
C methylated in unknown context (CN or CHN):	0.012
SC2
Final Cytosine Methylation Report
=================================
Total number of C's analysed:	13830395659
Total methylated C's in CpG context:	411514225
Total methylated C's in CHG context:	11911019
Total methylated C's in CHH context:	38673974
Total methylated C's in Unknown context:	51966
Total unmethylated C's in CpG context:	174458540
Total unmethylated C's in CHG context:	3019713962
Total unmethylated C's in CHH context:	10174123939
Total unmethylated C's in Unknown context:	4467738
C methylated in CpG context:	0.702
C methylated in CHG context:	0.004
C methylated in CHH context:	0.004
C methylated in unknown context (CN or CHN):	0.011
CC3
Final Cytosine Methylation Report
=================================
Total number of C's analysed:	14007434437
Total methylated C's in CpG context:	432071784
Total methylated C's in CHG context:	12286401
Total methylated C's in CHH context:	39826125
Total methylated C's in Unknown context:	56063
Total unmethylated C's in CpG context:	174049271
Total unmethylated C's in CHG context:	3064177535
Total unmethylated C's in CHH context:	10285023321
Total unmethylated C's in Unknown context:	4841661
C methylated in CpG context:	0.713
C methylated in CHG context:	0.004
C methylated in CHH context:	0.004
C methylated in unknown context (CN or CHN):	0.011
SC3
Final Cytosine Methylation Report
=================================
Total number of C's analysed:	14240318946
Total methylated C's in CpG context:	427505436
Total methylated C's in CHG context:	12047079
Total methylated C's in CHH context:	39182993
Total methylated C's in Unknown context:	52921
Total unmethylated C's in CpG context:	180508064
Total unmethylated C's in CHG context:	3109908254
Total unmethylated C's in CHH context:	10471167120
Total unmethylated C's in Unknown context:	4671496
C methylated in CpG context:	0.703
C methylated in CHG context:	0.004
C methylated in CHH context:	0.004
C methylated in unknown context (CN or CHN):	0.011
CC: clinical cow; HC: healthy cow; SC: subclinical cow
