# Supplementary material for: Genome-Wide DNA Methylation Profile in Jejunum Reveals the Potential Genes Associated With Paratuberculosis in Dairy Cattle
Source: Front Genet. 2021 Oct 15;12:735147. doi: 10.3389/fgene.2021.735147 (PMC8554095; doi:10.3389/fgene.2021.735147)
Supplement: Supplementary file 9 [file Table5.XLSX]

## Sheet: Sheet1
The methylated CpG sites on promoter of 31 common gene
Sample	Gene_id	Chromosome	Methylated_site	Methylated_site	Pomoter_Methylated	FPKM	Correlation
	CXCL10	Chr6	90884479	90884356
CC1			0	0	0	132.658	-0.068196
CC2			0	0	0	15.9065
CC3			0	0	0	8.88364
HC1			0	1	1	8.23179
HC2			1	0	1	6.35186
HC3			0	0	0	24.6606
SC1			0	1	1	163.737
SC2			0	0	0	91.4967
SC3			0	0	0	136.362
Sample	Gene_id	Chromosome	Methylated_site	Methylated_site	Pomoter_Methylated	FPKM	Correlation
	CALCRL	Chr2	8890812	8890813
CC1			0	0	0	21.1012	-0.561953
CC2			0	0	0	15.2091
CC3			1	0	1	10.6375
HC1			1	1	1	8.68509
HC2			1	1	1	10.5924
HC3			1	0	1	13.7674
SC1			1	0	1	0
SC2			1	0	1	0
SC3			1	1	1	18.2204
0 means un-methylated, and 1 means methylated
